# Supplementary material for: Overexpression Levels of LbDREB6 Differentially Affect Growth, Drought, and Disease Tolerance in Poplar
Source: Front Plant Sci. 2020 Nov 11;11:528550. doi: 10.3389/fpls.2020.528550 (PMC7693672; doi:10.3389/fpls.2020.528550)
Supplement: Supplementary Data 3 — The differentially expressed genes in OE18 compared to the OE14 plant. [file Table_3.XLS]

Gene	OE181_count	OE182_count	OE183_count	baseMean	OE141_count	OE142_count	OE143_count	FoldChange	Log2FoldChange	pval	padj	Up/Down	Significant	GeneName	Biotype	Position	NR:Seq-id	NR:Score	NR:Evalue	NR:Description	NT:Seq-id	NT:Score	NT:Evalue	NT:Description	Uniprot:UniProtKB-AC	Uniprot:Score	Uniprot:Evalue	Uniprot:Description	COG:gene	COG:Score	COG:Eval	COG:num	Pfam:pfam_ID	Pfam:pfam_Name	Pfam:pfam_Description	GO:biological_process	GO:cellular_component	GO:molecular_function	KEGG:KO	KEGG:Description
Potri.T019800.v3.0	329	304	249	153.0150701	0	0	0	1766.3715	10.78657308	9.42E-20	5.27E-19	up	yes	Potri.T019800	protein_coding	chrscaffold_27:408630-409507:-	gi|566167329|ref|XP_006384606.1|	768	3.00E-102	hypothetical protein POPTR_0004s18960g [Populus trichocarpa]	gi|566167330|ref|XM_006384545.1|	482	0	Populus trichocarpa hypothetical protein (POPTR_0004s18970g) mRNA, complete cds	.	.	.	.	.	.	.	.	pfam00407	Bet_v_1	Pathogenesis-related protein Bet v I family. This family is named after Bet v 1, the major birch pollen allergen. This protein belongs to family 10 of plant pathogenesis-related proteins (PR-10), cytoplasmic proteins of 15-17 kd that are wide-spread among dicotyledonous plants. In recent years, a number of diverse plant proteins with low sequence similarity to Bet v 1 was identified. A classifica…	.	.	.	.	.
Potri.001G017700.v3.0	145	135	145	74.75524017	0	0	0	860.2535115	9.748618066	3.42E-16	1.65E-15	up	yes	Potri.001G017700	protein_coding	chrChr01:1276680-1279016:+	gi|566257233|ref|XP_006388494.1|	2210	0	hypothetical protein POPTR_0172s00210g [Populus trichocarpa]	gi|566257232|ref|XM_006388432.1|	1338	0	Populus trichocarpa hypothetical protein (POPTR_0172s00210g) mRNA, complete cds	Q9SD53	151	3.00E-38	UPF0481 protein At3g47200	.	.	.	.	pfam03140	DUF247	Plant protein of unknown function. The function of the plant proteins constituting this family is unknown.	.	GO:0016021|integral component of membrane;GO:0005886|plasma membrane;	.	.	.
Potri.013G141900.v3.0	3591	3522	2887	1742.516756	9	12	14	318.7593925	8.316324043	1.72E-241	2.27E-239	up	yes	Potri.013G141900	protein_coding	chrChr13:14855716-14856736:+	gi|566161176|ref|XP_002304136.2|	908	1.00E-119	germin-like family protein [Populus trichocarpa]	gi|168176844|gb|AC217588.1|	1009	0	Populus trichocarpa clone POP047-P10, complete sequence	Q9ZRA4	251	2.00E-80	Auxin-binding protein ABP19a	.	.	.	.	pfam00190	Cupin_1	Cupin. This family represents the conserved barrel domain of the 'cupin' superfamily ('cupa' is the Latin term for a small barrel). This family contains 11S and 7S plant seed storage proteins, and germins. Plant seed storage proteins provide the major nitrogen source for the developing plant.	GO:0009734|auxin-activated signaling pathway;	GO:0048046|apoplast;GO:0005618|cell wall;	GO:0030145|manganese ion binding;GO:0045735|nutrient reservoir activity;	.	.
Potri.005G028100.v3.0	55	57	38	25.83268849	0	0	0	298.7681737	8.222882663	1.61E-11	6.15E-11	up	yes	Potri.005G028100	protein_coding	chrChr05:2056952-2058865:+	gi|566169069|ref|XP_006382509.1|	2382	0	hypothetical protein POPTR_0005s02820g [Populus trichocarpa]	gi|566169068|ref|XM_006382447.1|	1335	0	Populus trichocarpa hypothetical protein (POPTR_0005s02820g) mRNA, complete cds	Q8GSM7	516	2.00E-179	Shikimate O-hydroxycinnamoyltransferase	.	.	.	.	pfam02458	Transferase	Transferase family. This family includes a number of transferase enzymes. These include anthranilate N-hydroxycinnamoyl/benzoyltransferase that catalyses the first committed reaction of phytoalexin biosynthesis. Deacetylvindoline 4-O-acetyltransferase EC:2.3.1.107 catalyses the last step in vindoline biosynthesis is also a member of this family. The motif HXXXD is probably part of the active site…	.	.	GO:0047172|shikimate O-hydroxycinnamoyltransferase activity;	.	.
Potri.015G057300.v3.0	1010	1019	889	510.7873451	4	4	5	251.0760983	7.971980885	1.53E-84	3.63E-83	up	yes	Potri.015G057300	protein_coding	chrChr15:7852915-7856442:+	gi|743924899|ref|XP_011006580.1|	3157	0	PREDICTED: replication protein A 70 kDa DNA-binding subunit B [Populus euphratica]	gi|743924898|ref|XM_011008278.1|	2104	0	PREDICTED: Populus euphratica replication protein A 70 kDa DNA-binding subunit B (LOC105112548), mRNA	Q9SD82	877	0	Replication protein A 70 kDa DNA-binding subunit B	SPBC660.13c	271	3.00E-79	COG1599	pfam08646	Rep_fac-A_C	Replication factor-A C terminal domain. This domain is found at the C terminal of replication factor A. Replication factor A (RPA) binds single-stranded DNA and is involved in replication, repair, and recombination of DNA.	GO:0006310|DNA recombination;GO:0006281|DNA repair;GO:0006260|DNA replication;GO:0010224|response to UV-B;	GO:0005634|nucleus;	GO:0003677|DNA binding;GO:0046872|metal ion binding;	K07466	RFA1, RPA1, rpa; replication factor A1
Potri.T119700.v3.0	20	17	25	11.06635483	0	0	0	126.8712814	6.987221728	4.93E-08	1.52E-07	up	yes	Potri.T119700	protein_coding	chrscaffold_200:42449-43368:-	gi|566257284|ref|XP_006388517.1|	839	2.00E-110	hypothetical protein POPTR_0167s00240g [Populus trichocarpa]	gi|566257283|ref|XM_006388455.1|	896	0	Populus trichocarpa hypothetical protein (POPTR_0167s00240g) mRNA, complete cds	.	.	.	.	.	.	.	.	pfam14897	EpsG	EpsG family. This family of proteins are related to the EpsG protein from B. subtilis. These proteins are likely glycosyl transferases belonging to the membrane protein GT-C clan.	.	.	.	.	.
Potri.013G120600.v3.0	334	308	250	156.0432613	2	5	2	110.501683	6.787924533	5.85E-42	6.22E-41	up	yes	Potri.013G120600	protein_coding	chrChr13:13393705-13394592:-	gi|566200927|ref|XP_006376379.1|	750	5.00E-96	hypothetical protein POPTR_0013s12490g [Populus trichocarpa]	gi|566200926|ref|XM_006376317.1|	888	0	Populus trichocarpa hypothetical protein (POPTR_0013s12490g) mRNA, complete cds	Q9FFH6	182	4.00E-54	Fasciclin-like arabinogalactan protein 13	.	.	.	.	pfam02469	Fasciclin	Fasciclin domain. This extracellular domain is found repeated four times in grasshopper fasciclin I as well as in proteins from mammals, sea urchins, plants, yeast and bacteria.	.	GO:0031225|anchored component of membrane;GO:0046658|anchored component of plasma membrane;GO:0005794|Golgi apparatus;GO:0009505|plant-type cell wall;GO:0005886|plasma membrane;GO:0009506|plasmodesma;	.	.	.
Potri.006G072100.v3.0	154	142	95	67.8665617	2	1	1	107.9450298	6.754153007	2.05E-19	1.13E-18	up	yes	Potri.006G072100	protein_coding	chrChr06:5352427-5355756:+	gi|566174960|ref|XP_002308098.2|	1928	0	hypothetical protein POPTR_0006s07140g [Populus trichocarpa]	gi|566174959|ref|XM_002308062.2|	1102	0	Populus trichocarpa hypothetical protein (POPTR_0006s07140g) mRNA, complete cds	P27450	311	4.00E-99	Probable serine/threonine-protein kinase Cx32, chloroplastic	BH2504_1	97.4	2.00E-21	COG0515	pfam00069	Pkinase	Protein kinase domain.	.	GO:0009507|chloroplast;	GO:0005524|ATP binding;GO:0004674|protein serine/threonine kinase activity;	K00924	E2.7.1.-
Potri.013G144200.v3.0	2245	2086	1826	1081.583955	16	29	19	107.5927784	6.749437438	1.12E-266	1.84E-264	up	yes	Potri.013G144200	protein_coding	chrChr13:15002061-15003186:+	gi|224124580|ref|XP_002319367.1|	250	2.00E-23	hypothetical protein POPTR_0013s14040g [Populus trichocarpa]	gi|224124579|ref|XM_002319331.1|	404	0	Populus trichocarpa hypothetical protein (POPTR_0013s14040g) mRNA, complete cds	.	.	.	.	.	.	.	.	pfam07771	TSGP1	Tick salivary peptide group 1. This contains a group of peptides derived from a salivary gland cDNA library of the tick Ixodes scapularis. Also present are peptides from a related tick species, Ixodes ricinus. They are characterized by a putative signal peptide indicative of secretion and conserved cysteine residues.	.	.	.	.	.
Potri.019G073800.v3.0	30	45	28	17.93910957	0	0	1	105.5535048	6.721830672	5.96E-08	1.82E-07	up	yes	Potri.019G073800	protein_coding	chrChr19:10774545-10775567:-	gi|566239478|ref|XP_006371427.1|	1472	0	hypothetical protein POPTR_0019s10270g [Populus trichocarpa]	gi|158534104|gb|AC213088.1|	936	0	Populus trichocarpa clone POP086-B14, complete sequence	O04529	214	3.00E-64	Metalloendoproteinase 2-MMP	.	.	.	.	pfam00413	Peptidase_M10	Matrixin. The members of this family are enzymes that cleave peptides. These proteases require zinc for catalysis.	GO:0080186|developmental vegetative growth;GO:0007275|multicellular organismal development;GO:1900056|negative regulation of leaf senescence;GO:2000028|regulation of photoperiodism, flowering;GO:0046686|response to cadmium ion;GO:0009753|response to jasmonic acid;GO:0009651|response to salt stress;	GO:0031225|anchored component of membrane;GO:0031012|extracellular matrix;GO:0005886|plasma membrane;	GO:0004222|metalloendopeptidase activity;GO:0008270|zinc ion binding;	.	.
Potri.011G004000.v3.0	37	33	25	16.55697269	0	0	1	97.36653804	6.605354141	1.06E-07	3.20E-07	up	yes	Potri.011G004000	protein_coding	chrChr11:291686-295703:-	gi|743909035|ref|XP_011047986.1|	2812	0	PREDICTED: G-type lectin S-receptor-like serine/threonine-protein kinase SD2-5 [Populus euphratica]	gi|566260128|ref|XM_006389556.1|	1208	0	Populus trichocarpa hypothetical protein (POPTR_0021s00680g) mRNA, complete cds	Q8RWZ5	278	9.00E-80	G-type lectin S-receptor-like serine/threonine-protein kinase SD2-5	.	.	.	.	pfam00069	Pkinase	Protein kinase domain.	GO:0046777|protein autophosphorylation;	GO:0016021|integral component of membrane;GO:0005886|plasma membrane;	GO:0005524|ATP binding;GO:0005516|calmodulin binding;GO:0030246|carbohydrate binding;GO:0004672|protein kinase activity;GO:0004674|protein serine/threonine kinase activity;GO:0031625|ubiquitin protein ligase binding;	.	.
Potri.019G024600.v3.0	6163	6111	5194	3071.944852	57	88	58	96.2114999	6.588137441	0	0	up	yes	Potri.019G024600	protein_coding	chrChr19:2823618-2826073:+	gi|224144643|ref|XP_002325360.1|	1927	0	hypothetical protein POPTR_0019s04130g [Populus trichocarpa]	gi|566229578|ref|XM_002325324.2|	1423	0	Populus trichocarpa hypothetical protein (POPTR_0019s04130g) mRNA, complete cds	Q8LB81	568	0	GDSL esterase/lipase At5g33370	all3634	63.9	3.00E-10	COG3240	pfam00657	Lipase_GDSL	GDSL-like Lipase/Acylhydrolase.	GO:0016042|lipid catabolic process;	GO:0005576|extracellular region;	GO:0016788|hydrolase activity, acting on ester bonds;	.	.
Potri.017G085300.v3.0	745	703	580	355.8873527	7	6	11	94.17274077	6.557237613	1.88E-99	5.55E-98	up	yes	Potri.017G085300	protein_coding	chrChr17:10268894-10270584:-	gi|224141413|ref|XP_002324067.1|	1232	1.00E-165	expansin S1 precursor family protein [Populus trichocarpa]	gi|566212868|ref|XM_002324031.2|	1323	0	Populus trichocarpa expansin S1 precursor family protein (POPTR_0017s12150g) mRNA, complete cds	Q38864	349	4.00E-116	Expansin-A5	.	.	.	.	pfam01357	Pollen_allerg_1	Pollen allergen. This family contains allergens lol PI, PII and PIII from Lolium perenne.	GO:0009664|plant-type cell wall organization;GO:0080022|primary root development;GO:0009826|unidimensional cell growth;	GO:0005618|cell wall;GO:0005576|extracellular region;GO:0016020|membrane;	.	.	.
Potri.014G143900.v3.0	51	47	42	24.7169656	1	1	0	78.11266926	6.287484656	4.16E-09	1.37E-08	up	yes	Potri.014G143900	protein_coding	chrChr14:10982338-11000212:-	gi|743871082|ref|XP_011033763.1|	3085	0	PREDICTED: histone-lysine N-methyltransferase, H3 lysine-9 specific SUVH4 isoform X1 [Populus euphratica]	gi|743871085|ref|XM_011035463.1|	2195	0	PREDICTED: Populus euphratica histone-lysine N-methyltransferase, H3 lysine-9 specific SUVH4 (LOC105132136), transcript variant X2, mRNA	Q8GZB6	706	0	Histone-lysine N-methyltransferase, H3 lysine-9 specific SUVH4	SPBC428.08c	107	2.00E-23	COG2940	pfam02182	SAD_SRA	SAD/SRA domain. The domain goes by several names including SAD, SRA and YDG. It adopts a beta barrel, modified PUA-like, fold that is widely present in eukaryotic chromatin proteins and in bacteria. Versions of this domain are known to bind hemi-methylated CpG dinucleotides and also other 5mC containing dinucleotides. The domain binds DNA by flipping out the methylated cytosine base from the DNA …	GO:0051567|histone H3-K9 methylation;GO:0016571|histone methylation;GO:0010216|maintenance of DNA methylation;GO:0018022|peptidyl-lysine methylation;	GO:0000775|chromosome, centromeric region;GO:0005634|nucleus;	GO:0010385|double-stranded methylated DNA binding;GO:0046974|histone methyltransferase activity (H3-K9 specific);GO:0008327|methyl-CpG binding;GO:0010428|methyl-CpNpG binding;GO:0010429|methyl-CpNpN binding;GO:0008270|zinc ion binding;	K11420	EHMT; euchromatic histone-lysine N-methyltransferase [EC:2.1.1.43]
Potri.006G256100.v3.0	3589	3377	2641	1690.06854	38	62	72	62.23796948	5.959723088	0	0	up	yes	Potri.006G256100	protein_coding	chrChr06:26068735-26069411:-	gi|224092504|ref|XP_002309638.1|	396	2.00E-45	hypothetical protein POPTR_0006s27220g [Populus trichocarpa]	gi|224092503|ref|XM_002309602.1|	677	0	Populus trichocarpa hypothetical protein (POPTR_0006s27220g) mRNA, complete cds	P14009	106	3.00E-27	14 kDa proline-rich protein DC2.15	.	.	.	.	pfam14547	Hydrophob_seed	Hydrophobic seed protein. This domain has a four-helix bundle structure. It contains four disulfide bonds, of which three function to keep the C- and N-terminal parts of the molecule in place.	.	GO:0016021|integral component of membrane;	.	.	.
Potri.001G019400.v3.0	421	362	320	194.7381174	2	7	11	61.71644219	5.947582991	1.58E-65	2.74E-64	up	yes	Potri.001G019400	protein_coding	chrChr01:1414854-1417838:+	gi|224057451|ref|XP_002299232.1|	1819	0	hypothetical protein POPTR_0001s05690g [Populus trichocarpa]	gi|566147392|ref|XM_002299196.2|	1544	0	Populus trichocarpa hypothetical protein (POPTR_0001s05690g) mRNA, complete cds	P25083	588	0	ADP,ATP carrier protein, mitochondrial	.	.	.	.	pfam00153	Mito_carr	Mitochondrial carrier protein.	GO:0055085|transmembrane transport;	GO:0016021|integral component of membrane;GO:0005743|mitochondrial inner membrane;	GO:0005215|transporter activity;	.	.
Potri.013G154700.v3.0	858	887	660	423.0509886	7	18	20	59.5722746	5.89656914	5.31E-141	2.78E-139	up	yes	Potri.013G154700	protein_coding	chrChr13:15771135-15773143:+	gi|224124736|ref|XP_002319409.1|	1133	4.00E-151	expansin S1 precursor family protein [Populus trichocarpa]	gi|566201424|ref|XM_002319373.2|	1355	0	Populus trichocarpa expansin S1 precursor family protein (POPTR_0013s15080g) mRNA, complete cds	O22874	351	2.00E-117	Expansin-A8	.	.	.	.	pfam01357	Pollen_allerg_1	Pollen allergen. This family contains allergens lol PI, PII and PIII from Lolium perenne.	GO:0009664|plant-type cell wall organization;GO:0006949|syncytium formation;	GO:0005618|cell wall;GO:0005576|extracellular region;GO:0016020|membrane;	.	.	.
Potri.004G010100.v3.0	1511	1567	1238	761.8521631	16	34	33	58.08066803	5.859986142	8.90E-249	1.24E-246	up	yes	Potri.004G010100	protein_coding	chrChr04:656691-660989:-	gi|566164295|ref|XP_006383902.1|	2756	0	multi-copper oxidase type 1 family protein [Populus trichocarpa]	gi|566164294|ref|XM_006383840.1|	2031	0	Populus trichocarpa multi-copper oxidase type 1 family protein (POPTR_0004s01070g) mRNA, complete cds	Q00624	557	0	L-ascorbate oxidase homolog	SPAC1F7.08	87.8	4.00E-17	COG2132	pfam00394	Cu-oxidase	Multicopper oxidase. Many of the proteins in this family contain multiple similar copies of this plastocyanin-like domain.	.	GO:0005576|extracellular region;	GO:0005507|copper ion binding;GO:0016491|oxidoreductase activity;	.	.
Potri.002G046400.v3.0	2205	1960	1522	1001.351655	37	39	38	55.33337891	5.790078119	6.76E-304	1.41E-301	up	yes	Potri.002G046400	protein_coding	chrChr02:2966130-2968595:+	gi|224085557|ref|XP_002307619.1|	561	1.00E-67	hypothetical protein POPTR_0005s23810g [Populus trichocarpa]	gi|118482023|gb|EF144724.1|	658	0	Populus trichocarpa clone WS01117_H02 unknown mRNA	O23628	209	1.00E-64	Histone H2A variant 1	SPBC11B10.10c	160	8.00E-46	COG5262	pfam00125	Histone	Core histone H2A/H2B/H3/H4.	GO:0006342|chromatin silencing;GO:0042742|defense response to bacterium;GO:0016048|detection of temperature stimulus;GO:0009908|flower development;	GO:0000790|nuclear chromatin;GO:0000786|nucleosome;	GO:0003677|DNA binding;	K11251	H2A; histone H2A
Potri.008G182200.v3.0	581	615	513	303.4364387	12	12	13	51.56380458	5.68828681	1.47E-107	4.85E-106	up	yes	Potri.008G182200	protein_coding	chrChr08:12412731-12414811:+	gi|566184654|ref|XP_002311747.2|	1702	0	pectate lyase 5 precursor family protein [Populus trichocarpa]	gi|118484986|gb|EF146272.1|	1013	0	Populus trichocarpa clone WS0116_L18 unknown mRNA	Q9FXD8	583	0	Probable pectate lyase 5	TM0433	82.8	3.00E-16	COG3866	pfam00544	Pec_lyase_C	Pectate lyase. This enzyme forms a right handed beta helix structure. Pectate lyase is an enzyme involved in the maceration and soft rotting of plant tissue.	GO:0045490|pectin catabolic process;	.	GO:0046872|metal ion binding;GO:0030570|pectate lyase activity;	K01728	pel; pectate lyase [EC:4.2.2.2]
Potri.017G094200.v3.0	414	429	311	203.6127128	11	4	10	51.10622661	5.67542717	2.01E-73	4.00E-72	up	yes	Potri.017G094200	protein_coding	chrChr17:11118837-11120016:+	gi|224141075|ref|XP_002323900.1|	607	1.00E-75	hypothetical protein POPTR_0017s12970g [Populus trichocarpa]	gi|566213053|ref|XM_002323864.2|	891	0	Populus trichocarpa hypothetical protein (POPTR_0017s12970g) mRNA, complete cds	.	.	.	.	.	.	.	.	pfam10050	DUF2284	Predicted metal-binding protein (DUF2284). Members of this family of metal-binding hypothetical bacterial proteins have no known function.	.	.	.	.	.
Potri.001G070500.v3.0	964	1100	873	522.1512462	29	16	24	47.32087045	5.564404707	7.01E-179	5.26E-177	up	yes	Potri.001G070500	protein_coding	chrChr01:5615322-5621391:+	gi|566148627|ref|XP_006368844.1|	4572	0	hypothetical protein POPTR_0001s12700g [Populus trichocarpa]	gi|566148626|ref|XM_006368782.1|	3161	0	Populus trichocarpa hypothetical protein (POPTR_0001s12700g) mRNA, complete cds	B8BKI8	1377	0	DNA replication licensing factor MCM2	SPBC4.04c	750	0	COG1241	pfam00493	MCM	MCM2/3/5 family.	GO:0007049|cell cycle;GO:0006270|DNA replication initiation;GO:0009793|embryo development ending in seed dormancy;GO:0042127|regulation of cell proliferation;GO:0010082|regulation of root meristem growth;	GO:0005829|cytosol;GO:0042555|MCM complex;GO:0000347|THO complex;	GO:0005524|ATP binding;GO:0003677|DNA binding;GO:0003678|DNA helicase activity;GO:0046872|metal ion binding;	.	.
Potri.019G024400.v3.0	1114	1111	938	562.831021	31	26	20	45.74407686	5.515513044	5.09E-198	4.65E-196	up	yes	Potri.019G024400	protein_coding	chrChr19:2800499-2803623:+	gi|566229503|ref|XP_002325359.2|	1480	0	hypothetical protein POPTR_0019s04110g [Populus trichocarpa]	gi|566229502|ref|XM_002325323.2|	1053	0	Populus trichocarpa hypothetical protein (POPTR_0019s04110g) mRNA, complete cds	Q9M8Y5	382	7.00E-136	GDSL esterase/lipase LTL1	.	.	.	.	pfam00657	Lipase_GDSL	GDSL-like Lipase/Acylhydrolase.	GO:0042538|hyperosmotic salinity response;GO:0016042|lipid catabolic process;GO:0010226|response to lithium ion;GO:0009751|response to salicylic acid;	GO:0005576|extracellular region;	GO:0016788|hydrolase activity, acting on ester bonds;	.	.
Potri.018G069700.v3.0	800	754	547	370.6302494	16	15	20	45.65022811	5.512550164	2.87E-132	1.34E-130	up	yes	Potri.018G069700	protein_coding	chrChr18:8854024-8856355:+	gi|566214588|ref|XP_006371960.1|	1383	0	hypothetical protein POPTR_0018s06700g [Populus trichocarpa]	gi|566214587|ref|XM_006371898.1|	941	0	Populus trichocarpa hypothetical protein (POPTR_0018s06700g) mRNA, complete cds	Q8H1S0	405	6.00E-138	Inositol oxygenase 4	.	.	.	.	pfam05153	DUF706	Family of unknown function (DUF706). Family of uncharacterized eukaryotic function. Some members have a described putative function, but a common theme is not evident.	GO:0019310|inositol catabolic process;GO:0019853|L-ascorbic acid biosynthetic process;	GO:0005737|cytoplasm;	GO:0050113|inositol oxygenase activity;GO:0005506|iron ion binding;	K00469	MIOX; inositol oxygenase [EC:1.13.99.1]
Potri.009G152100.v3.0	38	27	17	14.28573637	0	0	2	45.24769759	5.499772478	8.10E-07	2.28E-06	up	yes	Potri.009G152100	protein_coding	chrChr09:11935137-11935954:+	gi|566188144|ref|XP_006379332.1|	518	1.00E-64	hypothetical protein POPTR_0009s15420g [Populus trichocarpa]	gi|566188143|ref|XM_006379270.1|	519	0	Populus trichocarpa hypothetical protein (POPTR_0009s15420g) mRNA, complete cds	.	.	.	.	.	.	.	.	pfam02906	Fe_hyd_lg_C	Iron only hydrogenase large subunit, C-terminal domain.	.	.	.	.	.
Potri.007G088000.v3.0	41	77	43	28.31882532	0	3	1	44.96542571	5.490744222	5.50E-12	2.15E-11	up	yes	Potri.007G088000	protein_coding	chrChr07:11376713-11382467:-	gi|566179831|ref|XP_002309993.2|	2396	0	hypothetical protein POPTR_0007s05960g [Populus trichocarpa]	gi|566179830|ref|XM_002309957.2|	1396	0	Populus trichocarpa hypothetical protein (POPTR_0007s05960g) mRNA, complete cds	Q42602	549	0	Cytochrome P450 89A2	all1361	78.6	2.00E-14	COG2124	pfam00067	p450	Cytochrome P450. Cytochrome P450s are haem-thiolate proteins involved in the oxidative degradation of various compounds. They are particularly well known for their role in the degradation of environmental toxins and mutagens. They can be divided into 4 classes, according to the method by which electrons from NAD(P)H are delivered to the catalytic site. Sequence conservation is relatively low with…	GO:0044550|secondary metabolite biosynthetic process;	GO:0016021|integral component of membrane;GO:0016020|membrane;	GO:0020037|heme binding;GO:0005506|iron ion binding;GO:0016709|oxidoreductase activity, acting on paired donors, with incorporation or reduction of molecular oxygen, NAD(P)H as one donor, and incorporation of one atom of oxygen;	.	.
Potri.005G012000.v3.0	89	86	63	42.01151737	1	3	2	44.16868833	5.464952085	1.46E-17	7.46E-17	up	yes	Potri.005G012000	protein_coding	chrChr05:897017-897857:+	gi|566168783|ref|XP_006382368.1|	429	5.00E-50	hypothetical protein POPTR_0005s01490g [Populus trichocarpa]	gi|566168782|ref|XM_006382306.1|	750	0	Populus trichocarpa hypothetical protein (POPTR_0005s01490g) mRNA, complete cds	.	.	.	.	.	.	.	.	pfam00520	Ion_trans	Ion transport protein. This family contains Sodium, Potassium, Calcium ion channels. This family is 6 transmembrane helices in which the last two helices flank a loop which determines ion selectivity. In some sub-families (e.g. Na channels) the domain is repeated four times, whereas in others (e.g. K channels) the protein forms as a tetramer in the membrane. A bacterial structure of the protein i…	.	.	.	.	.
Potri.013G127900.v3.0	2173	1925	1537	997.8279101	41	59	43	43.83331143	5.453955768	0	0	up	yes	Potri.013G127900	protein_coding	chrChr13:14038902-14040718:-	gi|566201069|ref|XP_006376450.1|	896	1.00E-114	hypothetical protein POPTR_0013s13160g [Populus trichocarpa]	gi|566201068|ref|XM_006376388.1|	786	0	Populus trichocarpa hypothetical protein (POPTR_0013s13160g) mRNA, complete cds	.	.	.	.	.	.	.	.	pfam13962	PGG	Domain of unknown function. The PGG domain is named for the highly conserved sequence motif found at the startt of the domain. The function is not known.	.	.	.	.	.
Potri.005G014900.v3.0	44	32	38	20.46772777	0	1	2	42.95322833	5.424694662	2.70E-09	9.01E-09	up	yes	Potri.005G014900	protein_coding	chrChr05:1171567-1177448:+	gi|566168847|ref|XP_006382400.1|	3392	0	hypothetical protein POPTR_0005s01780g [Populus trichocarpa]	gi|566258318|ref|XM_006388688.1|	1745	0	Populus trichocarpa hypothetical protein (POPTR_0107s002402g) mRNA, partial cds	O81906	653	0	G-type lectin S-receptor-like serine/threonine-protein kinase B120	.	.	.	.	pfam00069	Pkinase	Protein kinase domain.	GO:0006952|defense response;GO:0006468|protein phosphorylation;GO:0048544|recognition of pollen;	GO:0016021|integral component of membrane;GO:0005886|plasma membrane;GO:0009506|plasmodesma;	GO:0005524|ATP binding;GO:0005516|calmodulin binding;GO:0030246|carbohydrate binding;GO:0004674|protein serine/threonine kinase activity;	.	.
Potri.009G104600.v3.0	3862	4252	3144	1995.853773	79	116	98	42.78560803	5.419053688	0	0	up	yes	Potri.009G104600	protein_coding	chrChr09:9157154-9158411:-	gi|224103551|ref|XP_002313101.1|	1606	0	hypothetical protein POPTR_0009s10750g [Populus trichocarpa]	gi|566187360|ref|XM_002313065.2|	1255	0	Populus trichocarpa hypothetical protein (POPTR_0009s10750g) mRNA, complete cds	Q5NUF4	248	8.00E-77	2-hydroxyisoflavanone dehydratase	AF1716	75.5	2.00E-14	COG0657	pfam07859	Abhydrolase_3	alpha/beta hydrolase fold. This catalytic domain is found in a very wide range of enzymes.	GO:0009813|flavonoid biosynthetic process;GO:0009717|isoflavonoid biosynthetic process;GO:0046287|isoflavonoid metabolic process;	.	GO:0033987|2-hydroxyisoflavanone dehydratase activity;GO:0052689|carboxylic ester hydrolase activity;	.	.
Potri.001G367600.v3.0	2448	2524	1981	1234.833543	49	77	57	42.37444388	5.405122529	0	0	up	yes	Potri.001G367600	protein_coding	chrChr01:38028508-38029821:+	gi|566153316|ref|XP_006370005.1|	719	1.00E-88	hypothetical protein POPTR_0001s37630g, partial [Populus trichocarpa]	gi|159459641|gb|AC214028.1|	1279	0	Populus trichocarpa clone POP025-N21, complete sequence	.	.	.	.	.	.	.	.	pfam12233	p12I	Human adult T cell leukemia/lymphoma virus protein. This family of proteins is found in viruses. Proteins in this family are approximately 100 amino acids in length. p12I binds to the immature beta and gamma-c chains of the interleukin-2 receptor retarding their translocation to the plasma membrane. p12I forms dimers which bind to these chains.	.	.	.	.	.
Potri.005G209400.v3.0	461	429	364	223.1689662	10	8	15	42.35122034	5.404331636	1.07E-84	2.55E-83	up	yes	Potri.005G209400	protein_coding	chrChr05:22335323-22337261:-	gi|743867397|ref|XP_011032718.1|	1641	0	PREDICTED: uncharacterized protein LOC105131440 [Populus euphratica]	gi|743867396|ref|XM_011034416.1|	1072	0	PREDICTED: Populus euphratica uncharacterized LOC105131440 (LOC105131440), mRNA	.	.	.	.	.	.	.	.	pfam07888	CALCOCO1	Calcium binding and coiled-coil domain (CALCOCO1) like. Proteins found in this family are similar to the coiled-coil transcriptional coactivator protein coexpressed by Mus musculus (CoCoA/CALCOCO1). This protein binds to a highly conserved N-terminal domain of p160 coactivators, such as GRIP1, and thus enhances transcriptional activation by a number of nuclear receptors. CALCOCO1 has a central co…	.	.	.	.	.
Potri.008G078000.v3.0	829	804	653	406.266983	17	30	14	41.81228317	5.385854919	3.66E-150	2.06E-148	up	yes	Potri.008G078000	protein_coding	chrChr08:4849673-4850783:-	gi|224101255|ref|XP_002312204.1|	927	3.00E-122	hypothetical protein POPTR_0008s07760g [Populus trichocarpa]	gi|566182874|ref|XM_002312168.2|	861	0	Populus trichocarpa hypothetical protein (POPTR_0008s07760g) mRNA, complete cds	.	.	.	.	.	.	.	.	pfam12067	Sox_C_TAD	Sox C-terminal transactivation domain. This domain is found at the C-terminus of the Sox family of transcription factors. It is found associated with pfam00505. It binds to the Armadillo repeats (pfam00514) in Catenin beta-1 (CTNNB1), which is involved in transcriptional regulation. It functions as a transactivating domain (TAD).	.	.	.	.	.
Potri.001G254500.v3.0	658	625	483	313.6843579	15	19	17	38.50651994	5.267030839	2.92E-120	1.15E-118	up	yes	Potri.001G254500	protein_coding	chrChr01:26431472-26434063:+	gi|224059258|ref|XP_002299793.1|	907	3.00E-117	ubiquitin-conjugating enzyme 19 family protein [Populus trichocarpa]	gi|566151071|ref|XM_002299757.2|	1058	0	Populus trichocarpa ubiquitin-conjugating enzyme 19 family protein (POPTR_0001s26150g) mRNA, complete cds	Q9LJZ5	295	7.00E-96	Ubiquitin-conjugating enzyme E2 19	.	.	.	.	pfam00179	UQ_con	Ubiquitin-conjugating enzyme. Proteins destined for proteasome-mediated degradation may be ubiquitinated. Ubiquitination follows conjugation of ubiquitin to a conserved cysteine residue of UBC homologues. TSG101 is one of several UBC homologues that lacks this active site cysteine.	GO:0031145|anaphase-promoting complex-dependent proteasomal ubiquitin-dependent protein catabolic process;GO:0008283|cell proliferation;GO:0000209|protein polyubiquitination;GO:0030071|regulation of mitotic metaphase/anaphase transition;GO:0006511|ubiquitin-dependent protein catabolic process;	GO:0005737|cytoplasm;GO:0005634|nucleus;	GO:0005524|ATP binding;GO:0061630|ubiquitin protein ligase activity;GO:0031625|ubiquitin protein ligase binding;GO:0004842|ubiquitin-protein transferase activity;	K06688	UBE2C, UBC11; ubiquitin-conjugating enzyme E2 C [EC:2.3.2.23]
Potri.001G041200.v3.0	56	64	50	30.36239114	2	1	2	37.82064276	5.241101977	1.30E-13	5.51E-13	up	yes	Potri.001G041200	protein_coding	chrChr01:2996152-2998748:-	gi|566146966|ref|XP_006368482.1|	1476	0	hypothetical protein POPTR_0001s03250g [Populus trichocarpa]	gi|566163349|ref|XM_006385877.1|	785	0	Populus trichocarpa hypothetical protein (POPTR_0003s18370g) mRNA, complete cds	.	.	.	.	.	.	.	.	pfam08546	ApbA_C	Ketopantoate reductase PanE/ApbA C terminal. This is a family of 2-dehydropantoate 2-reductases also known as ketopantoate reductases, EC:1.1.1.169. The reaction catalysed by this enzyme is: (R)-pantoate + NADP(+) <=> 2-dehydropantoate + NADPH. AbpA catalyses the NADPH reduction of ketopantoic acid to pantoic acid in the alternative pyrimidine biosynthetic (APB) pathway. ApbA and PanE are allelic…	.	.	.	.	.
Potri.005G181400.v3.0	653	653	522	326.054832	24	20	10	37.58256888	5.231991777	3.87E-124	1.63E-122	up	yes	Potri.005G181400	protein_coding	chrChr05:19782145-19786003:+	gi|224082330|ref|XP_002306649.1|	2433	0	cyclin family protein [Populus trichocarpa]	gi|566172337|ref|XM_002306613.2|	1906	0	Populus trichocarpa cyclin family protein (POPTR_0005s20380g) mRNA, complete cds	Q9C6Y3	589	0	Cyclin-A1-1	SPBC582.03	184	7.00E-50	COG5024	pfam00134	Cyclin_N	Cyclin, N-terminal domain. Cyclins regulate cyclin dependent kinases (CDKs). Human cyclin-O is a Uracil-DNA glycosylase that is related to other cyclins. Cyclins contain two domains of similar all-alpha fold, of which this family corresponds with the N-terminal domain.	GO:0007049|cell cycle;GO:0051301|cell division;	GO:0005737|cytoplasm;GO:0005634|nucleus;	.	K06627	CCNA; cyclin A
Potri.012G131500.v3.0	512	534	376	252.4247637	13	16	15	35.86470971	5.164493049	2.79E-99	8.24E-98	up	yes	Potri.012G131500	protein_coding	chrChr12:14798333-14801364:+	gi|224122532|ref|XP_002318860.1|	3950	0	hypothetical protein POPTR_0012s14140g [Populus trichocarpa]	gi|743856789|ref|XM_011031705.1|	2667	0	PREDICTED: Populus euphratica subtilisin-like protease (LOC105129585), mRNA	Q9FLI4	1090	0	Subtilisin-like protease SBT1.3	BH0831	122	2.00E-27	COG1404	pfam00082	Peptidase_S8	Subtilase family. Subtilases are a family of serine proteases. They appear to have independently and convergently evolved an Asp/Ser/His catalytic triad, like that found in the trypsin serine proteases (see pfam00089). Structure is an alpha/beta fold containing a 7-stranded parallel beta sheet, order 2314567.	.	GO:0005618|cell wall;GO:0005576|extracellular region;	GO:0004252|serine-type endopeptidase activity;	.	.
Potri.016G033000.v3.0	667	704	520	336.4127953	15	27	17	35.69428436	5.157621172	6.23E-131	2.85E-129	up	yes	Potri.016G033000	protein_coding	chrChr16:1877506-1880786:-	gi|224139678|ref|XP_002323225.1|	1960	0	hypothetical protein POPTR_0016s03280g [Populus trichocarpa]	gi|566208445|ref|XM_002323189.2|	1524	0	Populus trichocarpa hypothetical protein (POPTR_0016s03280g) mRNA, complete cds	P25011	507	7.00E-173	G2/mitotic-specific cyclin S13-6	SPBC582.03	181	9.00E-49	COG5024	pfam00134	Cyclin_N	Cyclin, N-terminal domain. Cyclins regulate cyclin dependent kinases (CDKs). Human cyclin-O is a Uracil-DNA glycosylase that is related to other cyclins. Cyclins contain two domains of similar all-alpha fold, of which this family corresponds with the N-terminal domain.	GO:0051301|cell division;GO:0007067|mitotic nuclear division;	GO:0005634|nucleus;	.	.	.
Potri.017G081000.v3.0	5850	6020	4788	2972.591548	119	217	188	35.57693604	5.152870363	0	0	up	yes	Potri.017G081000	protein_coding	chrChr17:9465634-9467783:-	gi|743929404|ref|XP_011008936.1|	2234	0	PREDICTED: tubulin alpha chain [Populus euphratica]	gi|566212789|ref|XM_002324011.2|	1678	0	Populus trichocarpa hypothetical protein (POPTR_0017s11740g) mRNA, complete cds	P46259	858	0	Tubulin alpha-1 chain	SPBC800.05c	657	0	COG5023	pfam03953	Tubulin_C	Tubulin C-terminal domain. This family includes the tubulin alpha, beta and gamma chains. Members of this family are involved in polymer formation. Tubulins are GTPases. FtsZ can polymerize into tubes, sheets, and rings in vitro and is ubiquitous in eubacteria and archaea. Tubulin is the major component of microtubules. (The FtsZ GTPases have been split into their won family).	GO:0007017|microtubule-based process;	GO:0005737|cytoplasm;GO:0005874|microtubule;	GO:0005525|GTP binding;GO:0003924|GTPase activity;GO:0005200|structural constituent of cytoskeleton;	.	.
Potri.013G057500.v3.0	1988	1828	1394	926.3050394	48	53	62	35.4670347	5.148406811	0	0	up	yes	Potri.013G057500	protein_coding	chrChr13:4295661-4296463:-	gi|566199597|ref|XP_002319690.2|	219	2.00E-19	hypothetical protein POPTR_0013s05400g, partial [Populus trichocarpa]	gi|118481298|gb|EF144349.1|	531	0	Populus trichocarpa clone PX0015_O12 unknown mRNA	.	.	.	.	.	.	.	.	pfam14093	DUF4271	Domain of unknown function (DUF4271). This family of integral membrane proteins is functionally uncharacterized. This family of proteins is found in bacteria. Proteins in this family are typically between 221 and 326 amino acids in length.	.	.	.	.	.
Potri.002G007300.v3.0	552	572	433	277.5129069	15	24	11	34.66933955	5.115588448	1.60E-109	5.45E-108	up	yes	Potri.002G007300	protein_coding	chrChr02:392742-395240:+	gi|566155580|ref|XP_002300634.2|	2300	0	hypothetical protein POPTR_0002s00860g [Populus trichocarpa]	gi|566155579|ref|XM_002300598.2|	1907	0	Populus trichocarpa hypothetical protein (POPTR_0002s00860g) mRNA, complete cds	Q8VYE5	347	4.00E-109	Glucan endo-1,3-beta-glucosidase 12	.	.	.	.	pfam00332	Glyco_hydro_17	Glycosyl hydrolases family 17.	GO:0005975|carbohydrate metabolic process;GO:0071555|cell wall organization;GO:0006952|defense response;	GO:0031225|anchored component of membrane;GO:0046658|anchored component of plasma membrane;GO:0005618|cell wall;GO:0005576|extracellular region;	GO:0042973|glucan endo-1,3-beta-D-glucosidase activity;GO:0004553|hydrolase activity, hydrolyzing O-glycosyl compounds;GO:0030247|polysaccharide binding;	.	.
Potri.016G126800.v3.0	28	37	27	16.50561725	2	0	1	33.85310733	5.081216358	3.40E-08	1.06E-07	up	yes	Potri.016G126800	protein_coding	chrChr16:12940489-12942214:-	gi|566210104|ref|XP_006374026.1|	521	3.00E-63	hypothetical protein POPTR_0016s13450g [Populus trichocarpa]	gi|566258821|ref|XM_006388922.1|	465	0	Populus trichocarpa hypothetical protein (POPTR_0064s00280g) mRNA, complete cds	P91850	78.6	9.00E-17	Macrophage migration inhibitory factor homolog	.	.	.	.	pfam01187	MIF	Macrophage migration inhibitory factor (MIF).	.	GO:0005615|extracellular space;	GO:0004167|dopachrome isomerase activity;GO:0050178|phenylpyruvate tautomerase activity;	K07253	MIF; phenylpyruvate tautomerase [EC:5.3.2.1]
Potri.009G058900.v3.0	844	1011	728	460.8182348	23	33	29	33.84196489	5.08074143	1.70E-172	1.21E-170	up	yes	Potri.009G058900	protein_coding	chrChr09:6144261-6151144:+	gi|566186612|ref|XP_002314046.2|	7211	0	DNA topoisomerase family protein [Populus trichocarpa]	gi|566186611|ref|XM_002314010.2|	4429	0	Populus trichocarpa DNA topoisomerase family protein (POPTR_0009s06380g) mRNA, complete cds	P30182	1683	0	DNA topoisomerase 2	SPBC1A4.03c_1	772	0	COG0187	pfam00521	DNA_topoisoIV	DNA gyrase/topoisomerase IV, subunit A.	GO:0006265|DNA topological change;GO:0006268|DNA unwinding involved in DNA replication;GO:0044774|mitotic DNA integrity checkpoint;GO:0006312|mitotic recombination;GO:0000712|resolution of meiotic recombination intermediates;GO:0000819|sister chromatid segregation;	GO:0009330|DNA topoisomerase complex (ATP-hydrolyzing);GO:0005634|nucleus;	GO:0005524|ATP binding;GO:0003677|DNA binding;GO:0003916|DNA topoisomerase activity;GO:0003918|DNA topoisomerase type II (ATP-hydrolyzing) activity;GO:0046872|metal ion binding;	K03164	TOP2; DNA topoisomerase II [EC:5.99.1.3]
Potri.005G240900.v3.0	332	345	284	171.9263479	4	15	13	33.67380121	5.073554681	6.23E-70	1.17E-68	up	yes	Potri.005G240900	protein_coding	chrChr05:24695218-24697839:+	gi|566173327|ref|XP_002306938.2|	1616	0	pathogenesis-related thaumatin family protein [Populus trichocarpa]	gi|743903437|ref|XM_011046767.1|	1372	0	PREDICTED: Populus euphratica thaumatin-like protein 1b (LOC105140084), mRNA	P83332	268	2.00E-83	Thaumatin-like protein 1	.	.	.	.	pfam00314	Thaumatin	Thaumatin family.	GO:0006952|defense response;	GO:0005576|extracellular region;	.	.	.
Potri.013G053200.v3.0	758	799	563	377.1475343	15	28	29	32.76185761	5.033945256	1.49E-146	8.10E-145	up	yes	Potri.013G053200	protein_coding	chrChr13:3975371-3977045:-	gi|224125800|ref|XP_002319678.1|	1557	0	Syntaxin-related protein KNOLLE [Populus trichocarpa]	gi|566199514|ref|XM_002319642.2|	1351	0	Populus trichocarpa Syntaxin-related protein KNOLLE (POPTR_0013s05010g) mRNA, complete cds	Q42374	430	2.00E-147	Syntaxin-related protein KNOLLE	SPCC825.03c	70.1	1.00E-12	COG5074	pfam05739	SNARE	SNARE domain. Most if not all vesicular membrane fusion events in eukaryotic cells are believed to be mediated by a conserved fusion machinery, the SNARE [soluble N-ethylmaleimide-sensitive factor (NSF) attachment protein (SNAP) receptors] machinery. The SNARE domain is thought to act as a protein-protein interaction module in the assembly of a SNARE protein complex.	GO:0007049|cell cycle;GO:0051301|cell division;GO:0006887|exocytosis;GO:0006886|intracellular protein transport;GO:0048278|vesicle docking;GO:0006906|vesicle fusion;	GO:0009504|cell plate;GO:0012505|endomembrane system;GO:0016021|integral component of membrane;GO:0009524|phragmoplast;GO:0005886|plasma membrane;GO:0009506|plasmodesma;GO:0031201|SNARE complex;	GO:0000149|SNARE binding;	K08486	STX1B_2_3; syntaxin 1B/2/3
Potri.016G126300.v3.0	1061	1210	948	576.8645704	33	39	38	32.63378415	5.028294384	8.42E-216	9.16E-214	up	yes	Potri.016G126300	protein_coding	chrChr16:12916315-12919632:-	gi|566210097|ref|XP_002323617.2|	4005	0	LRR-kinase family protein [Populus trichocarpa]	gi|566210096|ref|XM_002323581.2|	2651	0	Populus trichocarpa LRR-kinase family protein (POPTR_0016s13400g) mRNA, complete cds	Q9SCT4	1038	0	Probably inactive leucine-rich repeat receptor-like protein kinase IMK2	alr0124_1	111	5.00E-25	COG4886	pfam00069	Pkinase	Protein kinase domain.	.	GO:0005618|cell wall;GO:0016021|integral component of membrane;GO:0009505|plant-type cell wall;GO:0005886|plasma membrane;GO:0009506|plasmodesma;	GO:0005524|ATP binding;GO:0004672|protein kinase activity;	.	.
Potri.001G093700.v3.0	1216	1274	947	613.7419071	43	36	38	32.56551981	5.02527335	2.13E-230	2.56E-228	up	yes	Potri.001G093700	protein_coding	chrChr01:7370956-7373711:-	gi|224058355|ref|XP_002299486.1|	1697	0	high mobility group family protein [Populus trichocarpa]	gi|224058354|ref|XM_002299450.1|	1728	0	Populus trichocarpa high mobility group family protein (POPTR_0001s10410g) mRNA, complete cds	Q9T012	325	3.00E-102	High mobility group B protein 13	YBR089c-a	59.3	1.00E-09	COG5648	pfam00505	HMG_box	HMG (high mobility group) box.	.	GO:0005634|nucleus;	GO:0003677|DNA binding;GO:0003700|transcription factor activity, sequence-specific DNA binding;	K09273	UBTF; upstream-binding transcription factor
Potri.006G264600.v3.0	678	623	453	312.0321538	18	16	26	32.37379649	5.016754656	1.27E-119	4.97E-118	up	yes	Potri.006G264600	protein_coding	chrChr06:26754833-26755600:+	gi|224089370|ref|XP_002308708.1|	863	4.00E-115	Early nodulin-like protein 1 precursor [Populus trichocarpa]	gi|566178537|ref|XM_002308672.2|	682	0	Populus trichocarpa Early nodulin-like protein 1 precursor (POPTR_0006s28040g) mRNA, complete cds	Q9SK27	184	2.00E-56	Early nodulin-like protein 1	.	.	.	.	pfam02298	Cu_bind_like	Plastocyanin-like domain. This family represents a domain found in flowering plants related to the copper binding protein plastocyanin. Some members of this family may not bind copper due to the lack of key residues.	.	GO:0031225|anchored component of membrane;GO:0046658|anchored component of plasma membrane;GO:0005886|plasma membrane;GO:0009506|plasmodesma;	GO:0009055|electron carrier activity;	.	.
Potri.016G015500.v3.0	20984	21802	16469	10582.8764	578	756	706	32.28929616	5.012984089	0	0	up	yes	Potri.016G015500	protein_coding	chrChr16:840589-842654:-	gi|566208158|ref|XP_002323166.2|	484	8.00E-51	hypothetical protein POPTR_0016s01720g [Populus trichocarpa]	gi|566208157|ref|XM_002323130.2|	1417	0	Populus trichocarpa hypothetical protein (POPTR_0016s01720g) mRNA, complete cds	Q00451	112	2.00E-25	36.4 kDa proline-rich protein	.	.	.	.	pfam14547	Hydrophob_seed	Hydrophobic seed protein. This domain has a four-helix bundle structure. It contains four disulfide bonds, of which three function to keep the C- and N-terminal parts of the molecule in place.	GO:0006511|ubiquitin-dependent protein catabolic process;	GO:0005737|cytoplasm;GO:0005634|nucleus;GO:0019773|proteasome core complex, alpha-subunit complex;	GO:0004298|threonine-type endopeptidase activity;	.	.
Potri.T046200.v3.0	179	173	137	87.34069297	3	8	6	32.13057352	5.005874828	2.52E-37	2.40E-36	up	yes	Potri.T046200	protein_coding	chrscaffold_42:293450-298164:-	gi|743911718|ref|XP_010999722.1|	3414	0	PREDICTED: chloride channel protein CLC-c-like [Populus euphratica]	gi|743911717|ref|XM_011001420.1|	2493	0	PREDICTED: Populus euphratica chloride channel protein CLC-c-like (LOC105107480), transcript variant X1, mRNA	Q96282	945	0	Chloride channel protein CLC-c	YJR040w_1	65.1	7.00E-10	COG0038	pfam00654	Voltage_CLC	Voltage gated chloride channel. This family of ion channels contains 10 or 12 transmembrane helices. Each protein forms a single pore. It has been shown that some members of this family form homodimers. In terms of primary structure, they are unrelated to known cation channels or other types of anion channels. Three ClC subfamilies are found in animals. ClC-1 is involved in setting and restoring …	.	GO:0034707|chloride channel complex;GO:0009705|plant-type vacuole membrane;GO:0005774|vacuolar membrane;	GO:0005247|voltage-gated chloride channel activity;	K05016	CLCN7; chloride channel 7
Potri.007G056500.v3.0	381	464	385	221.6522766	16	8	19	31.88485153	4.994799258	2.12E-85	5.14E-84	up	yes	Potri.007G056500	protein_coding	chrChr07:5978584-5981095:+	gi|566180419|ref|XP_006380601.1|	2633	0	hypothetical protein POPTR_0007s09700g [Populus trichocarpa]	gi|566180418|ref|XM_006380539.1|	1881	0	Populus trichocarpa hypothetical protein (POPTR_0007s09700g) mRNA, complete cds	Q9SD20	602	0	Protein POLLENLESS 3-LIKE 2	.	.	.	.	pfam14559	TPR_19	Tetratricopeptide repeat.	GO:0007049|cell cycle;GO:0051301|cell division;	GO:0005634|nucleus;	.	.	.
Potri.008G192300.v3.0	432	474	376	229.9269674	14	15	16	31.75650196	4.988980101	2.03E-93	5.51E-92	up	yes	Potri.008G192300	protein_coding	chrChr08:13388472-13391264:+	gi|743872555|ref|XP_011034170.1|	3065	0	PREDICTED: uncharacterized protein LOC105132389 isoform X1 [Populus euphratica]	gi|743872558|ref|XM_011035869.1|	1951	0	PREDICTED: Populus euphratica uncharacterized LOC105132389 (LOC105132389), transcript variant X2, mRNA	.	.	.	.	.	.	.	.	pfam06075	DUF936	Plant protein of unknown function (DUF936). This family consists of several hypothetical proteins from Arabidopsis thaliana and Oryza sativa. The function of this family is unknown.	.	.	.	.	.
Potri.019G101900.v3.0	1704	1716	1369	857.4463714	44	64	61	31.60875333	4.98225223	0	0	up	yes	Potri.019G101900	protein_coding	chrChr19:13104292-13107165:+	gi|566243669|ref|XP_006371575.1|	1124	1.00E-147	hypothetical protein POPTR_0019s13300g [Populus trichocarpa]	gi|566243668|ref|XM_006371513.1|	1036	0	Populus trichocarpa hypothetical protein (POPTR_0019s13300g) mRNA, complete cds	Q9M0I2	366	3.00E-121	Expansin-B3	.	.	.	.	pfam01357	Pollen_allerg_1	Pollen allergen. This family contains allergens lol PI, PII and PIII from Lolium perenne.	GO:0071555|cell wall organization;GO:0019953|sexual reproduction;GO:0006949|syncytium formation;	GO:0005618|cell wall;GO:0005576|extracellular region;GO:0016020|membrane;GO:0009506|plasmodesma;	.	.	.
Potri.002G044800.v3.0	301	350	261	163.5709092	14	11	8	30.66961442	4.938738124	3.51E-67	6.29E-66	up	yes	Potri.002G044800	protein_coding	chrChr02:2848700-2853770:+	gi|224062247|ref|XP_002300803.1|	2534	0	F-box family protein [Populus trichocarpa]	gi|566156227|ref|XM_002300767.2|	2044	0	Populus trichocarpa F-box family protein (POPTR_0002s04570g) mRNA, complete cds	Q8W104	560	0	F-box/LRR-repeat protein 17	.	.	.	.	pfam00606	Glycoprotein_B	Herpesvirus Glycoprotein B. This family of proteins contains a transmembrane region.	GO:0009793|embryo development ending in seed dormancy;GO:0055047|generative cell mitosis;GO:0009555|pollen development;GO:0016567|protein ubiquitination;GO:0031146|SCF-dependent proteasomal ubiquitin-dependent protein catabolic process;GO:0048316|seed development;	GO:0001673|male germ cell nucleus;GO:0019005|SCF ubiquitin ligase complex;	.	.	.
Potri.001G287800.v3.0	216	245	138	105.8125038	3	13	6	30.21032245	4.916969678	3.46E-43	3.79E-42	up	yes	Potri.001G287800	protein_coding	chrChr01:29363146-29367855:+	gi|743857733|ref|XP_011030263.1|	3528	0	PREDICTED: uncharacterized protein LOC105129756 isoform X3 [Populus euphratica]	gi|743857732|ref|XM_011031961.1|	2145	0	PREDICTED: Populus euphratica uncharacterized LOC105129756 (LOC105129756), transcript variant X3, mRNA	.	.	.	.	.	.	.	.	pfam09847	DUF2074	Predicted permease (DUF2074). This domain, found in various archaeal hypothetical proteins, has no known function.	.	.	.	.	.
Potri.001G461400.v3.0	927	999	716	472.0221591	22	56	22	29.84709006	4.899518378	2.07E-51	2.71E-50	up	yes	Potri.001G461400	protein_coding	chrChr01:49512635-49515163:+	gi|224056779|ref|XP_002299019.1|	2073	0	hypothetical protein POPTR_0001s46570g [Populus trichocarpa]	gi|566155235|ref|XM_002298983.2|	1924	0	Populus trichocarpa hypothetical protein (POPTR_0001s46570g) mRNA, complete cds	Q94C59	496	6.00E-167	Patellin-4	.	.	.	.	pfam00650	CRAL_TRIO	CRAL/TRIO domain.	GO:0007049|cell cycle;GO:0051301|cell division;	GO:0005829|cytosol;GO:0016021|integral component of membrane;GO:0005634|nucleus;GO:0005886|plasma membrane;	GO:0008289|lipid binding;GO:0005215|transporter activity;	.	.
Potri.019G094000.v3.0	1656	1631	1437	851.3185793	45	63	71	29.5519928	4.885183515	1.74E-306	3.71E-304	up	yes	Potri.019G094000	protein_coding	chrChr19:12401201-12402456:-	gi|566242213|ref|XP_002326041.2|	1270	2.00E-173	hypothetical protein POPTR_0019s12380g [Populus trichocarpa]	gi|566242212|ref|XM_002326005.2|	1051	0	Populus trichocarpa hypothetical protein (POPTR_0019s12380g) mRNA, complete cds	P27054	342	2.00E-115	Endochitinase PR4	.	.	.	.	pfam00182	Glyco_hydro_19	Chitinase class I.	GO:0016998|cell wall macromolecule catabolic process;GO:0006032|chitin catabolic process;GO:0006952|defense response;GO:0000272|polysaccharide catabolic process;	.	GO:0008061|chitin binding;GO:0004568|chitinase activity;	.	.
Potri.009G049600.v3.0	881	900	660	436.9864569	31	32	31	28.80724389	4.848359733	1.58E-172	1.12E-170	up	yes	Potri.009G049600	protein_coding	chrChr09:5462356-5464345:+	gi|224106219|ref|XP_002314089.1|	958	1.00E-127	ubiquitin-conjugating enzyme 19 family protein [Populus trichocarpa]	gi|224106218|ref|XM_002314053.1|	971	0	Populus trichocarpa ubiquitin-conjugating enzyme 19 family protein (POPTR_0009s05420g) mRNA, complete cds	Q9LJZ5	296	6.00E-99	Ubiquitin-conjugating enzyme E2 19	.	.	.	.	pfam00179	UQ_con	Ubiquitin-conjugating enzyme. Proteins destined for proteasome-mediated degradation may be ubiquitinated. Ubiquitination follows conjugation of ubiquitin to a conserved cysteine residue of UBC homologues. TSG101 is one of several UBC homologues that lacks this active site cysteine.	GO:0031145|anaphase-promoting complex-dependent proteasomal ubiquitin-dependent protein catabolic process;GO:0008283|cell proliferation;GO:0000209|protein polyubiquitination;GO:0030071|regulation of mitotic metaphase/anaphase transition;GO:0006511|ubiquitin-dependent protein catabolic process;	GO:0005737|cytoplasm;GO:0005634|nucleus;	GO:0005524|ATP binding;GO:0061630|ubiquitin protein ligase activity;GO:0031625|ubiquitin protein ligase binding;GO:0004842|ubiquitin-protein transferase activity;	K06688	UBE2C, UBC11; ubiquitin-conjugating enzyme E2 C [EC:2.3.2.23]
Potri.018G025900.v3.0	9529	8994	7107	4596.373566	264	385	354	28.48098183	4.831926977	0	0	up	yes	Potri.018G025900	protein_coding	chrChr18:2065664-2069015:+	gi|566213743|ref|XP_002324869.2|	494	4.00E-59	hypothetical protein POPTR_0018s01890g [Populus trichocarpa]	gi|566213742|ref|XM_002324833.2|	631	0	Populus trichocarpa hypothetical protein (POPTR_0018s01890g) mRNA, complete cds	P14009	111	2.00E-28	14 kDa proline-rich protein DC2.15	.	.	.	.	pfam14547	Hydrophob_seed	Hydrophobic seed protein. This domain has a four-helix bundle structure. It contains four disulfide bonds, of which three function to keep the C- and N-terminal parts of the molecule in place.	.	GO:0016021|integral component of membrane;	.	.	.
Potri.014G024000.v3.0	745	765	594	377.7841321	23	32	28	28.24165883	4.819752926	3.08E-153	1.78E-151	up	yes	Potri.014G024000	protein_coding	chrChr14:2053622-2056247:+	gi|566202013|ref|XP_006374885.1|	1659	0	hypothetical protein POPTR_0014s02400g [Populus trichocarpa]	gi|566202012|ref|XM_006374823.1|	1672	0	Populus trichocarpa hypothetical protein (POPTR_0014s02400g) mRNA, complete cds	Q58G01	78.6	1.00E-13	Transcription factor bHLH155	.	.	.	.	pfam14215	bHLH-MYC_N	bHLH-MYC and R2R3-MYB transcription factors N-terminal. This is the N-terminal region of a family of MYB and MYC transcription factors. The DNA-binding HLH domain is further downstream, pfam00010. Members of the MYB and MYC family regulate the biosynthesis of phenylpropanoids in several plant species (DOI:10.1007/s11295-009-0232-y).	GO:0006355|regulation of transcription, DNA-templated;GO:0048364|root development;GO:0006351|transcription, DNA-templated;	GO:0005634|nucleus;	GO:0003677|DNA binding;	.	.
Potri.015G039200.v3.0	2729	2635	2050	1329.504007	67	120	108	28.04873854	4.809863984	0	0	up	yes	Potri.015G039200	protein_coding	chrChr15:3592986-3594214:+	gi|224135541|ref|XP_002322099.1|	1142	1.00E-154	hypothetical protein POPTR_0015s04510g [Populus trichocarpa]	gi|566205802|ref|XM_002322063.2|	964	0	Populus trichocarpa hypothetical protein (POPTR_0015s04510g) mRNA, complete cds	P50699	349	8.00E-119	Thaumatin-like protein	.	.	.	.	pfam00314	Thaumatin	Thaumatin family.	GO:0006351|transcription, DNA-templated;	GO:0005829|cytosol;GO:0005634|nucleus;	GO:0003677|DNA binding;GO:0003700|transcription factor activity, sequence-specific DNA binding;	.	.
Potri.009G112500.v3.0	1163	1164	893	578.6684959	40	46	47	26.91706461	4.750449183	3.38E-227	3.98E-225	up	yes	Potri.009G112500	protein_coding	chrChr09:9594032-9594787:+	gi|566187492|ref|XP_002313813.2|	492	1.00E-59	hypothetical protein POPTR_0009s11560g [Populus trichocarpa]	gi|566187491|ref|XM_002313777.2|	684	0	Populus trichocarpa hypothetical protein (POPTR_0009s11560g) mRNA, complete cds	Q8W453	61.6	6.00E-11	Putative lipid-transfer protein DIR1	.	.	.	.	pfam14368	LTP_2	Probable lipid transfer. The members of this family are probably involved in lipid transfer. The family has several highly conserved cysteines, paired in various ways.	GO:0006869|lipid transport;GO:0009862|systemic acquired resistance, salicylic acid mediated signaling pathway;	GO:0048046|apoplast;GO:0005783|endoplasmic reticulum;GO:0009506|plasmodesma;	GO:0005504|fatty acid binding;GO:0043621|protein self-association;GO:0008270|zinc ion binding;	.	.
Potri.001G336300.v3.0	735	828	601	388.619898	21	46	24	26.53999055	4.730095952	7.66E-152	4.37E-150	up	yes	Potri.001G336300	protein_coding	chrChr01:33941873-33945762:-	gi|224055665|ref|XP_002298592.1|	2467	0	hypothetical protein POPTR_0001s36260g [Populus trichocarpa]	gi|566153071|ref|XM_002298556.2|	1865	0	Populus trichocarpa hypothetical protein (POPTR_0001s36260g) mRNA, complete cds	Q67Y69	83.2	3.00E-15	Protein WVD2-like 7	.	.	.	.	pfam06886	TPX2	Targeting protein for Xklp2 (TPX2). This family represents a conserved region approximately 60 residues long within the eukaryotic targeting protein for Xklp2 (TPX2). Xklp2 is a kinesin-like protein localized on centrosomes throughout the cell cycle and on spindle pole microtubules during metaphase. In Xenopus, it has been shown that Xklp2 protein is required for centrosome separation and mainten…	.	GO:0005737|cytoplasm;GO:0005874|microtubule;	.	.	.
Potri.018G072500.v3.0	464	554	397	254.7602548	23	20	17	26.14731623	4.70859097	7.17E-103	2.21E-101	up	yes	Potri.018G072500	protein_coding	chrChr18:9395417-9398841:+	gi|566214484|ref|XP_002324965.2|	3400	0	hypothetical protein POPTR_0018s06270g [Populus trichocarpa]	gi|566214483|ref|XM_002324929.2|	2251	0	Populus trichocarpa hypothetical protein (POPTR_0018s06270g) mRNA, complete cds	.	.	.	.	.	.	.	.	pfam06075	DUF936	Plant protein of unknown function (DUF936). This family consists of several hypothetical proteins from Arabidopsis thaliana and Oryza sativa. The function of this family is unknown.	.	.	.	.	.
Potri.005G257500.v3.0	931	826	668	436.1372905	26	43	35	25.99035757	4.699904577	3.28E-169	2.26E-167	up	yes	Potri.005G257500	protein_coding	chrChr05:25710738-25713014:-	gi|224086116|ref|XP_002307822.1|	1212	8.00E-172	cyclin-dependent kinase family protein [Populus trichocarpa]	gi|566173635|ref|XM_002307786.2|	753	0	Populus trichocarpa cyclin-dependent kinase family protein (POPTR_0005s27890g) mRNA, complete cds	Q8LF80	426	4.00E-150	Cyclin-dependent kinase B2-1	.	.	.	.	pfam00069	Pkinase	Protein kinase domain.	GO:0000086|G2/M transition of mitotic cell cycle;GO:0016572|histone phosphorylation;GO:0009755|hormone-mediated signaling pathway;GO:0010389|regulation of G2/M transition of mitotic cell cycle;GO:0009934|regulation of meristem structural organization;	GO:0000307|cyclin-dependent protein kinase holoenzyme complex;	GO:0005524|ATP binding;GO:0004693|cyclin-dependent protein serine/threonine kinase activity;GO:0008353|RNA polymerase II carboxy-terminal domain kinase activity;	K07760	CDK; cyclin-dependent kinase [EC:2.7.11.22]
Potri.005G144900.v3.0	2113	2238	1734	1097.142037	84	102	77	25.73802215	4.685829288	0	0	up	yes	Potri.005G144900	protein_coding	chrChr05:12436106-12437898:-	.	.	.	.	gi|566172091|ref|XM_006383482.1|	958	0	Populus trichocarpa hypothetical protein (POPTR_0005s18840g) mRNA, complete cds	.	.	.	.	.	.	.	.	pfam12725	DUF3810	Protein of unknown function (DUF3810). This family of proteins is functionally uncharacterized. This family of proteins is found in bacteria. Proteins in this family are typically between 333 and 377 amino acids in length. There is a conserved HEXXH sequence motif that is characteristic of metallopeptidases. This family may therefore belong to an as yet uncharacterized family of peptidase enzymes.	.	.	.	.	.
Potri.017G014300.v3.0	312	347	266	166.8932895	13	12	15	25.72748518	4.685238537	5.55E-71	1.06E-69	up	yes	Potri.017G014300	protein_coding	chrChr17:1179393-1181741:+	gi|566211376|ref|XP_006372740.1|	1657	0	reticulon family protein [Populus trichocarpa]	gi|566211375|ref|XM_006372678.1|	1448	0	Populus trichocarpa reticulon family protein (POPTR_0017s04610g) mRNA, complete cds	Q6DR04	283	2.00E-87	Reticulon-like protein B17	.	.	.	.	pfam02453	Reticulon	Reticulon. Reticulon, also know as neuroendocrine-specific protein (NSP), is a protein of unknown function which associates with the endoplasmic reticulum. This family represents the C-terminal domain of the three reticulon isoforms and their homologues.	.	GO:0012505|endomembrane system;GO:0005789|endoplasmic reticulum membrane;GO:0016021|integral component of membrane;	.	.	.
Potri.001G109400.v3.0	620	786	595	361.5406146	24	29	34	25.66660436	4.681820538	8.63E-138	4.34E-136	up	yes	Potri.001G109400	protein_coding	chrChr01:8694950-8697986:-	gi|224058599|ref|XP_002299559.1|	3366	0	hypothetical protein POPTR_0001s08850g [Populus trichocarpa]	gi|743852214|ref|XM_011030895.1|	2714	0	PREDICTED: Populus euphratica scarecrow-like protein 28 (LOC105129009), mRNA	Q9CAN3	711	0	Scarecrow-like protein 28	.	.	.	.	pfam03514	GRAS	GRAS domain family. Proteins in the GRAS (GAI, RGA, SCR) family are known as major players in gibberellin (GA) signaling, which regulates various aspects of plant growth and development. Mutation of the SCARECROW (SCR) gene results in a radial pattern defect, loss of a ground tissue layer, in the root. The PAT1 protein is involved in phytochrome A signal transduction. A sequence, structure and ev…	GO:0006355|regulation of transcription, DNA-templated;GO:0006351|transcription, DNA-templated;	GO:0005634|nucleus;	GO:0043565|sequence-specific DNA binding;GO:0003700|transcription factor activity, sequence-specific DNA binding;	.	.
Potri.011G094400.v3.0	915	993	777	484.3463572	29	48	40	25.62852912	4.679678776	4.28E-193	3.78E-191	up	yes	Potri.011G094400	protein_coding	chrChr11:11477082-11479851:+	gi|566194626|ref|XP_002316783.2|	2231	0	glycosyl hydrolase family 17 family protein [Populus trichocarpa]	gi|566194625|ref|XM_002316747.2|	1838	0	Populus trichocarpa glycosyl hydrolase family 17 family protein (POPTR_0011s09660g) mRNA, complete cds	Q9FJU9	335	2.00E-105	Glucan endo-1,3-beta-glucosidase 13	.	.	.	.	pfam00332	Glyco_hydro_17	Glycosyl hydrolases family 17.	GO:0005975|carbohydrate metabolic process;GO:0071555|cell wall organization;GO:0006952|defense response;	GO:0031225|anchored component of membrane;GO:0046658|anchored component of plasma membrane;GO:0005576|extracellular region;GO:0009505|plant-type cell wall;GO:0005886|plasma membrane;	GO:0042973|glucan endo-1,3-beta-D-glucosidase activity;GO:0004553|hydrolase activity, hydrolyzing O-glycosyl compounds;GO:0030247|polysaccharide binding;	.	.
Potri.010G179300.v3.0	864	799	630	412.7551676	25	32	44	25.27435206	4.659602202	1.84E-162	1.17E-160	up	yes	Potri.010G179300	protein_coding	chrChr10:17809228-17810726:+	gi|566191522|ref|XP_002315113.2|	1156	1.00E-155	hypothetical protein POPTR_0010s18640g [Populus trichocarpa]	gi|566191521|ref|XM_002315077.2|	963	0	Populus trichocarpa hypothetical protein (POPTR_0010s18640g) mRNA, complete cds	.	.	.	.	.	.	.	.	pfam04973	NMN_transporter	Nicotinamide mononucleotide transporter. Members of this family are integral membrane proteins that are involved in transport of nicotinamide mononucleotide.	.	.	.	.	.
Potri.010G007700.v3.0	27	23	17	11.96548098	0	3	0	25.09072777	4.649082412	1.40E-06	3.89E-06	up	yes	Potri.010G007700	protein_coding	chrChr10:834358-835212:-	gi|566188572|ref|XP_002315495.2|	1070	3.00E-145	hypothetical protein POPTR_0010s01150g [Populus trichocarpa]	gi|566188571|ref|XM_002315459.2|	855	0	Populus trichocarpa hypothetical protein (POPTR_0010s01150g) mRNA, complete cds	P16335	252	5.00E-82	Wound-responsive protein GWIN3	.	.	.	.	pfam00197	Kunitz_legume	Trypsin and protease inhibitor.	.	.	GO:0004866|endopeptidase inhibitor activity;	.	.
Potri.010G183400.v3.0	127	163	110	71.94651903	4	7	7	24.74906256	4.629301975	6.41E-32	5.35E-31	up	yes	Potri.010G183400	protein_coding	chrChr10:18066606-18069486:+	gi|743801701|ref|XP_011015296.1|	3523	0	PREDICTED: probably inactive leucine-rich repeat receptor-like protein kinase IMK2 [Populus euphratica]	gi|566191599|ref|XM_002315093.2|	2521	0	Populus trichocarpa leucine-rich repeat transmembrane protein kinase (POPTR_0010s19070g) mRNA, complete cds	C0LGP9	926	0	Probable leucine-rich repeat receptor-like protein kinase IMK3	ECU01g0630	90.9	3.00E-18	COG0515	pfam00069	Pkinase	Protein kinase domain.	.	GO:0016021|integral component of membrane;GO:0005886|plasma membrane;	GO:0005524|ATP binding;GO:0004674|protein serine/threonine kinase activity;	.	.
Potri.004G189000.v3.0	415	489	376	231.5912588	12	25	23	23.87737002	4.577572034	1.09E-95	3.05E-94	up	yes	Potri.004G189000	protein_coding	chrChr04:20392803-20397818:-	gi|566167493|ref|XP_006384673.1|	2887	0	glycosyl transferase family 2 family protein [Populus trichocarpa]	gi|566167492|ref|XM_006384611.1|	2485	0	Populus trichocarpa glycosyl transferase family 2 family protein (POPTR_0004s20040g) mRNA, complete cds	Q9FNI7	930	0	Glucomannan 4-beta-mannosyltransferase 2	AGl3021	109	9.00E-24	COG1215	pfam13641	Glyco_tranf_2_3	Glycosyltransferase like family 2. Members of this family of prokaryotic proteins include putative glucosyltransferase, which are involved in bacterial capsule biosynthesis.	GO:0071555|cell wall organization;GO:0010192|mucilage biosynthetic process;GO:0048359|mucilage metabolic process involved in seed coat development;	GO:0005794|Golgi apparatus;GO:0000139|Golgi membrane;GO:0016021|integral component of membrane;	GO:0047259|glucomannan 4-beta-mannosyltransferase activity;GO:0051753|mannan synthase activity;	K13680	CSLA; beta-mannan synthase [EC:2.4.1.32]
Potri.006G190400.v3.0	336	311	231	158.0865876	14	19	8	23.74980392	4.569843697	2.30E-66	4.04E-65	up	yes	Potri.006G190400	protein_coding	chrChr06:20507576-20510096:+	gi|566177266|ref|XP_002309313.2|	3041	0	hypothetical protein POPTR_0006s20480g [Populus trichocarpa]	gi|566177265|ref|XM_002309277.2|	1737	0	Populus trichocarpa hypothetical protein (POPTR_0006s20480g) mRNA, complete cds	.	.	.	.	.	.	.	.	pfam03646	FlaG	FlaG protein. Although important for flagella the exact function of this protein is unknown.	.	.	.	.	.
Potri.004G101600.v3.0	268	244	170	122.4209706	10	13	9	23.58909099	4.56004792	3.19E-52	4.24E-51	up	yes	Potri.004G101600	protein_coding	chrChr04:8905599-8908026:+	gi|566165850|ref|XP_006384205.1|	1025	9.00E-137	hypothetical protein POPTR_0004s10110g [Populus trichocarpa]	gi|566165849|ref|XM_006384143.1|	916	0	Populus trichocarpa hypothetical protein (POPTR_0004s10110g) mRNA, complete cds	.	.	.	.	.	.	.	.	pfam08326	ACC_central	Acetyl-CoA carboxylase, central region. The region featured in this family is found in various eukaryotic acetyl-CoA carboxylases, N-terminal to the catalytic domain (pfam01039). This enzyme (EC:6.4.1.2) is involved in the synthesis of long-chain fatty acids, as it catalyses the rate-limiting step in this process.	.	.	.	.	.
Potri.007G122100.v3.0	1555	1477	1070	738.5045719	59	75	61	23.31178626	4.54298765	3.08E-264	4.97E-262	up	yes	Potri.007G122100	protein_coding	chrChr07:14042329-14044168:-	gi|224093204|ref|XP_002309832.1|	1680	0	peroxidase precursor family protein [Populus trichocarpa]	gi|566179250|ref|XM_002309796.2|	1458	0	Populus trichocarpa peroxidase precursor family protein (POPTR_0007s02580g) mRNA, complete cds	O23044	496	2.00E-172	Peroxidase 3	.	.	.	.	pfam00141	peroxidase	Peroxidase.	GO:0042744|hydrogen peroxide catabolic process;GO:0042538|hyperosmotic salinity response;GO:0009664|plant-type cell wall organization;GO:0009409|response to cold;GO:0009269|response to desiccation;GO:0006979|response to oxidative stress;	GO:0005783|endoplasmic reticulum;GO:0005576|extracellular region;GO:0009505|plant-type cell wall;	GO:0020037|heme binding;GO:0046872|metal ion binding;GO:0004601|peroxidase activity;	K00430	E1.11.1.7; peroxidase [EC:1.11.1.7]
Potri.001G360200.v3.0	864	1005	715	466.6994674	36	43	45	23.15900507	4.53350137	2.31E-182	1.80E-180	up	yes	Potri.001G360200	protein_coding	chrChr01:37089334-37095363:+	gi|566153212|ref|XP_002298848.2|	5493	0	kinesin motor family protein [Populus trichocarpa]	gi|566153211|ref|XM_002298812.2|	3846	0	Populus trichocarpa kinesin motor family protein (POPTR_0001s37120g) mRNA, complete cds	F4JDI6	800	0	Kinesin-like protein KIN-12F	SPAC1834.07	204	9.00E-55	COG5059	pfam06548	Kinesin-related	Kinesin-related. This family represents a region within kinesin-related proteins from higher plants. Many family members also contain the pfam00225 domain. Kinesins are ATP-driven microtubule motor proteins that produce directed force. Some family members are associated with the phragmoplast, a structure composed mainly of microtubules that executes cytokinesis in higher plants.	GO:0007018|microtubule-based movement;	GO:0005871|kinesin complex;GO:0005874|microtubule;	GO:0005524|ATP binding;GO:0008574|ATP-dependent microtubule motor activity, plus-end-directed;	K10400	KIF15; kinesin family member 15
Potri.010G076800.v3.0	1221	1295	1016	639.7207184	40	60	72	22.93092833	4.519222857	1.05E-247	1.46E-245	up	yes	Potri.010G076800	protein_coding	chrChr10:10267733-10268745:-	gi|118482152|gb|ABK93006.1|	297	4.00E-29	unknown [Populus trichocarpa]	gi|566189827|ref|XM_002315691.2|	894	0	Populus trichocarpa hypothetical protein (POPTR_0010s08740g) mRNA, complete cds	P08283	81.6	8.00E-17	Histone H1	.	.	.	.	pfam00538	Linker_histone	linker histone H1 and H5 family. Linker histone H1 is an essential component of chromatin structure. H1 links nucleosomes into higher order structures Histone H1 is replaced by histone H5 in some cell types.	GO:0006334|nucleosome assembly;	GO:0000786|nucleosome;GO:0005634|nucleus;	GO:0003677|DNA binding;	.	.
Potri.006G210700.v3.0	466	486	404	246.3617686	20	24	22	22.92879935	4.519088906	8.21E-104	2.57E-102	up	yes	Potri.006G210700	protein_coding	chrChr06:22522052-22530620:-	gi|224091967|ref|XP_002309420.1|	5135	0	hypothetical protein POPTR_0006s22720g [Populus trichocarpa]	gi|566177637|ref|XM_002309384.2|	3431	0	Populus trichocarpa hypothetical protein (POPTR_0006s22720g) mRNA, complete cds	O23826	1476	0	Kinesin-like protein KIN-5C	SPAC25G10.07c	371	6.00E-109	COG5059	pfam00225	Kinesin	Kinesin motor domain.	GO:0007018|microtubule-based movement;	GO:0005737|cytoplasm;GO:0005874|microtubule;GO:0005819|spindle;	GO:0005524|ATP binding;GO:0020037|heme binding;GO:0005506|iron ion binding;GO:0003777|microtubule motor activity;GO:0016705|oxidoreductase activity, acting on paired donors, with incorporation or reduction of molecular oxygen;	.	.
Potri.011G021400.v3.0	230	236	198	120.6193681	7	14	12	22.53292387	4.493962625	5.88E-53	7.96E-52	up	yes	Potri.011G021400	protein_coding	chrChr11:1820782-1824503:-	gi|566192993|ref|XP_002316546.2|	3682	0	hypothetical protein POPTR_0011s00920g [Populus trichocarpa]	gi|743913461|ref|XM_011002341.1|	2261	0	PREDICTED: Populus euphratica receptor-like protein 12 (LOC105108147), transcript variant X1, mRNA	Q9C9H7	346	5.00E-102	Receptor-like protein 12	alr0124_1	83.2	1.00E-15	COG4886	pfam13855	LRR_8	Leucine rich repeat.	.	GO:0016021|integral component of membrane;GO:0005886|plasma membrane;	.	.	.
Potri.019G043600.v3.0	1984	2099	1721	1054.279603	70	119	100	22.48397101	4.490824955	0	0	up	yes	Potri.019G043600	protein_coding	chrChr19:5098387-5100725:+	gi|566233484|ref|XP_002325454.2|	2434	0	transferase family protein [Populus trichocarpa]	gi|566233483|ref|XM_002325418.2|	1660	0	Populus trichocarpa transferase family protein (POPTR_0019s06040g) mRNA, complete cds	Q8GT20	729	0	Benzyl alcohol O-benzoyltransferase	.	.	.	.	pfam02458	Transferase	Transferase family. This family includes a number of transferase enzymes. These include anthranilate N-hydroxycinnamoyl/benzoyltransferase that catalyses the first committed reaction of phytoalexin biosynthesis. Deacetylvindoline 4-O-acetyltransferase EC:2.3.1.107 catalyses the last step in vindoline biosynthesis is also a member of this family. The motif HXXXD is probably part of the active site…	.	.	GO:0016747|transferase activity, transferring acyl groups other than amino-acyl groups;	.	.
Potri.018G018200.v3.0	1438	1427	1065	711.3421023	64	68	68	21.79040312	4.445620981	5.83E-269	9.95E-267	up	yes	Potri.018G018200	protein_coding	chrChr18:1393715-1394619:-	gi|566213880|ref|XP_002324335.2|	1011	2.00E-136	hypothetical protein POPTR_0018s02630g [Populus trichocarpa]	gi|566213879|ref|XM_002324299.2|	739	0	Populus trichocarpa hypothetical protein (POPTR_0018s02630g) mRNA, complete cds	Q9SK27	176	1.00E-52	Early nodulin-like protein 1	.	.	.	.	pfam02298	Cu_bind_like	Plastocyanin-like domain. This family represents a domain found in flowering plants related to the copper binding protein plastocyanin. Some members of this family may not bind copper due to the lack of key residues.	.	GO:0031225|anchored component of membrane;GO:0046658|anchored component of plasma membrane;GO:0005886|plasma membrane;GO:0009506|plasmodesma;	GO:0009055|electron carrier activity;	.	.
Potri.001G141100.v3.0	288	292	223	145.7411751	17	13	11	21.6896851	4.438937202	7.22E-63	1.19E-61	up	yes	Potri.001G141100	protein_coding	chrChr01:11342732-11345630:+	gi|566146769|ref|XP_006368389.1|	1462	0	hypothetical protein POPTR_0001s02350g [Populus trichocarpa]	gi|566146768|ref|XM_006368327.1|	1531	0	Populus trichocarpa hypothetical protein (POPTR_0001s02350g) mRNA, complete cds	Q56XR0	222	5.00E-65	Transcription factor bHLH71	.	.	.	.	pfam00010	HLH	Helix-loop-helix DNA-binding domain.	GO:0007275|multicellular organismal development;GO:0006355|regulation of transcription, DNA-templated;GO:0006351|transcription, DNA-templated;	GO:0005634|nucleus;	GO:0003677|DNA binding;GO:0003700|transcription factor activity, sequence-specific DNA binding;	.	.
Potri.018G114600.v3.0	293	310	216	148.0310536	12	22	9	21.17342219	4.404182561	4.70E-63	7.75E-62	up	yes	Potri.018G114600	protein_coding	chrChr18:13957497-13960072:+	gi|224142455|ref|XP_002324573.1|	2844	0	hypothetical protein POPTR_0018s12250g [Populus trichocarpa]	gi|566215451|ref|XM_002324537.2|	1974	0	Populus trichocarpa hypothetical protein (POPTR_0018s12250g) mRNA, complete cds	.	.	.	.	.	.	.	.	pfam15089	DUF4552	Domain of unknown function (DUF4552). This family of proteins is functionally uncharacterized. This family of proteins is found in vertebrates. Proteins in this family are typically between 425 and 649 amino acids in length.	.	.	.	.	.
Potri.006G228200.v3.0	2204	2389	1883	1178.286597	83	128	134	20.98243004	4.391109866	0	0	up	yes	Potri.006G228200	protein_coding	chrChr06:23930645-23932849:+	gi|224088826|ref|XP_002308556.1|	2348	0	hypothetical protein POPTR_0006s24460g [Populus trichocarpa]	gi|566177928|ref|XM_002308520.2|	2003	0	Populus trichocarpa hypothetical protein (POPTR_0006s24460g) mRNA, complete cds	O04353	659	0	Acyl-lipid (9-3)-desaturase	Rv3229c	68.9	2.00E-11	COG3239	pfam00487	FA_desaturase	Fatty acid desaturase.	GO:0006636|unsaturated fatty acid biosynthetic process;	GO:0005789|endoplasmic reticulum membrane;GO:0016021|integral component of membrane;	GO:0046872|metal ion binding;GO:0016491|oxidoreductase activity;	.	.
Potri.009G084400.v3.0	528	577	475	288.303678	22	31	32	20.78405498	4.377405247	1.23E-119	4.80E-118	up	yes	Potri.009G084400	protein_coding	chrChr09:7907741-7911472:+	gi|566187043|ref|XP_002313930.2|	3867	0	hypothetical protein POPTR_0009s08770g [Populus trichocarpa]	gi|566187042|ref|XM_002313894.2|	2712	0	Populus trichocarpa hypothetical protein (POPTR_0009s08770g) mRNA, complete cds	.	.	.	.	.	.	.	.	pfam05045	RgpF	Rhamnan synthesis protein F. This family consists of a group of proteins which are related to the Streptococcus rhamnose-glucose polysaccharide assembly protein (RgpF). Rhamnan backbones are found in several O polysaccharides of phytopathogenic bacteria and are regarded as pathogenic factors.	.	.	.	.	.
Potri.010G167200.v3.0	4495	4778	3741	2368.197185	189	267	245	20.71185062	4.37238456	0	0	up	yes	Potri.010G167200	protein_coding	chrChr10:17010039-17012320:+	gi|224108996|ref|XP_002315043.1|	1017	8.00E-133	expansin 4 family protein [Populus trichocarpa]	gi|566191312|ref|XM_006378529.1|	1323	0	Populus trichocarpa hypothetical protein (POPTR_0010s17440g) mRNA, complete cds	Q9C554	334	7.00E-110	Expansin-A1	.	.	.	.	pfam01357	Pollen_allerg_1	Pollen allergen. This family contains allergens lol PI, PII and PIII from Lolium perenne.	GO:0009664|plant-type cell wall organization;	GO:0005618|cell wall;GO:0005576|extracellular region;GO:0016020|membrane;	.	.	.
Potri.001G278300.v3.0	310	275	226	147.3435378	11	23	10	20.58271222	4.363361196	1.84E-62	3.00E-61	up	yes	Potri.001G278300	protein_coding	chrChr01:28440132-28443743:+	gi|566151481|ref|XP_002298483.2|	2026	0	hypothetical protein POPTR_0001s28490g [Populus trichocarpa]	gi|566151480|ref|XM_002298447.2|	1422	0	Populus trichocarpa hypothetical protein (POPTR_0001s28490g) mRNA, complete cds	Q9LUZ6	525	0	Protein PMR5	.	.	.	.	pfam13839	PC-Esterase	GDSL/SGNH-like Acyl-Esterase family found in Pmr5 and Cas1p. The PC-Esterase family is comprised of Cas1p, the Homo sapiens C7orf58, Arabidopsis thaliana PMR5 and a group of plant freezing resistance/coldacclimatization proteins typified by Arabidopsis thaliana ESKIMO1. animal FAM55D proteins, and animal FAM113 proteins. The PC-Esterase family has features that are both similar and different from…	GO:0071554|cell wall organization or biogenesis;GO:0006952|defense response;GO:0009620|response to fungus;	GO:0005783|endoplasmic reticulum;GO:0005794|Golgi apparatus;GO:0016021|integral component of membrane;	GO:0016413|O-acetyltransferase activity;	.	.
Potri.006G034100.v3.0	2139	2390	1857	1164.906579	97	140	121	19.91050291	4.315457757	0	0	up	yes	Potri.006G034100	protein_coding	chrChr06:2311361-2312652:+	gi|566174241|ref|XP_002307955.2|	1770	0	hypothetical protein POPTR_0006s03260g [Populus trichocarpa]	gi|566174240|ref|XM_002307919.2|	1067	0	Populus trichocarpa hypothetical protein (POPTR_0006s03260g) mRNA, complete cds	O64988	182	7.00E-51	Acetyl-CoA-benzylalcohol acetyltransferase	.	.	.	.	pfam02458	Transferase	Transferase family. This family includes a number of transferase enzymes. These include anthranilate N-hydroxycinnamoyl/benzoyltransferase that catalyses the first committed reaction of phytoalexin biosynthesis. Deacetylvindoline 4-O-acetyltransferase EC:2.3.1.107 catalyses the last step in vindoline biosynthesis is also a member of this family. The motif HXXXD is probably part of the active site…	.	.	GO:0016747|transferase activity, transferring acyl groups other than amino-acyl groups;	.	.
Potri.006G226600.v3.0	377	373	302	191.8239329	14	15	30	19.88570115	4.313659526	1.74E-80	3.88E-79	up	yes	Potri.006G226600	protein_coding	chrChr06:23817184-23820667:+	gi|566177902|ref|XP_006382010.1|	1842	0	hypothetical protein POPTR_0006s24310g [Populus trichocarpa]	gi|566177901|ref|XM_006381948.1|	1864	0	Populus trichocarpa hypothetical protein (POPTR_0006s24310g) mRNA, complete cds	Q9SF32	86.7	2.00E-16	Protein IQ-DOMAIN 1	.	.	.	.	pfam13178	DUF4005	Protein of unknown function (DUF4005). This is a C-terminal region of plant IQ-containing putative calmodulin-binding proteins.	.	GO:0005634|nucleus;	.	.	.
Potri.011G150700.v3.0	494	435	322	226.899259	20	23	28	19.5303809	4.287648181	5.54E-92	1.47E-90	up	yes	Potri.011G150700	protein_coding	chrChr11:16910126-16914040:-	gi|743894715|ref|XP_011040613.1|	911	2.00E-118	PREDICTED: 50S ribosomal protein L11, chloroplastic [Populus euphratica]	gi|743894714|ref|XM_011042311.1|	776	0	PREDICTED: Populus euphratica 50S ribosomal protein L11, chloroplastic (LOC105136822), mRNA	Q9MAP3	293	1.00E-95	50S ribosomal protein L11, chloroplastic	sll1743	196	2.00E-59	COG0080	pfam00298	Ribosomal_L11	Ribosomal protein L11, RNA binding domain.	GO:0000027|ribosomal large subunit assembly;GO:0006412|translation;	GO:0009507|chloroplast;GO:0009941|chloroplast envelope;GO:0009570|chloroplast stroma;GO:0022626|cytosolic ribosome;GO:0016020|membrane;GO:0005762|mitochondrial large ribosomal subunit;	GO:0019843|rRNA binding;GO:0003735|structural constituent of ribosome;	K02867	RP-L11, MRPL11, rplK; large subunit ribosomal protein L11
Potri.001G272000.v3.0	570	600	483	302.3738349	29	33	34	19.1888633	4.262197347	1.73E-126	7.49E-125	up	yes	Potri.001G272000	protein_coding	chrChr01:27938069-27941461:+	gi|566151371|ref|XP_002298451.2|	1996	0	hypothetical protein POPTR_0001s27890g [Populus trichocarpa]	gi|743835445|ref|XM_011026716.1|	1460	0	PREDICTED: Populus euphratica G2/mitotic-specific cyclin S13-7-like (LOC105126013), transcript variant X1, mRNA	O48790	435	7.00E-146	Cyclin-B1-4	SPBC582.03	189	1.00E-51	COG5024	pfam00134	Cyclin_N	Cyclin, N-terminal domain. Cyclins regulate cyclin dependent kinases (CDKs). Human cyclin-O is a Uracil-DNA glycosylase that is related to other cyclins. Cyclins contain two domains of similar all-alpha fold, of which this family corresponds with the N-terminal domain.	GO:0007049|cell cycle;GO:0051301|cell division;	GO:0005634|nucleus;	.	K05868	CCNB; cyclin B
Potri.006G050400.v3.0	31	33	36	18.59051106	2	4	0	18.83885476	4.235639359	1.94E-09	6.53E-09	up	yes	Potri.006G050400	protein_coding	chrChr06:3648880-3650533:-	gi|566174520|ref|XP_002308942.2|	1993	0	hypothetical protein POPTR_0006s04890g [Populus trichocarpa]	gi|743909164|ref|XM_011049753.1|	1202	0	PREDICTED: Populus euphratica uncharacterized LOC105142230 (LOC105142230), mRNA	.	.	.	.	.	.	.	.	pfam04862	DUF642	Protein of unknown function (DUF642). This family represents a duplicated conserved region found in a number of uncharacterized plant proteins, potentially in the stem. There is a conserved CGP sequence motif.	.	.	.	.	.
Potri.019G031200.v3.0	4447	4706	3672	2343.637386	185	305	274	18.77462378	4.230712093	0	0	up	yes	Potri.019G031200	protein_coding	chrChr19:3509185-3513455:+	gi|224144743|ref|XP_002325398.1|	2096	0	putative apyrase family protein [Populus trichocarpa]	gi|566231020|ref|XM_002325362.2|	1561	0	Populus trichocarpa putative apyrase family protein (POPTR_0019s04670g) mRNA, complete cds	Q9SPM5	419	3.00E-139	Apyrase 2	SPAC824.08	149	7.00E-38	COG5371	pfam01150	GDA1_CD39	GDA1/CD39 (nucleoside phosphatase) family.	.	GO:0000139|Golgi membrane;GO:0016021|integral component of membrane;	GO:0005524|ATP binding;GO:0016787|hydrolase activity;	K14641	APY1_2; apyrase [EC:3.6.1.5]
Potri.006G137800.v3.0	1694	1704	1319	861.157767	75	109	97	18.7038689	4.225264818	0	0	up	yes	Potri.006G137800	protein_coding	chrChr06:11466239-11467284:+	gi|566176295|ref|XP_006381574.1|	965	3.00E-129	hypothetical protein POPTR_0006s14010g [Populus trichocarpa]	gi|566176294|ref|XM_006381512.1|	770	0	Populus trichocarpa hypothetical protein (POPTR_0006s14010g) mRNA, complete cds	P17407	128	3.00E-34	21 kDa protein	.	.	.	.	pfam04043	PMEI	Plant invertase/pectin methylesterase inhibitor. This domain inhibits pectin methylesterases (PMEs) and invertases through formation of a non-covalent 1:1 complex. It has been implicated in the regulation of fruit development, carbohydrate metabolizm and cell wall extension. It may also be involved in inhibiting microbial pathogen PMEs. It has been observed that it is often expressed as a large i…	.	.	GO:0004857|enzyme inhibitor activity;	.	.
Potri.018G014800.v3.0	2659	2837	2038	1373.104116	118	164	172	18.45410444	4.205869822	0	0	up	yes	Potri.018G014800	protein_coding	chrChr18:1193775-1196907:+	gi|566213941|ref|XP_002324933.2|	2445	0	hypothetical protein POPTR_0018s03000g [Populus trichocarpa]	gi|566213940|ref|XM_002324897.2|	1515	0	Populus trichocarpa hypothetical protein (POPTR_0018s03000g) mRNA, complete cds	Q8S9J6	312	2.00E-98	Aspartyl protease family protein At5g10770	.	.	.	.	pfam14543	TAXi_N	Xylanase inhibitor N-terminal. The N- and C-termini of the members of this family are jointly necessary for creating the catalytic pocket necessary for cleaving xylanase. Phytopathogens produce xylanase that destroys plant cells, so its destruction through proteolysis is vital for plant-survival.	GO:0030163|protein catabolic process;GO:0006508|proteolysis;	GO:0031225|anchored component of membrane;GO:0005886|plasma membrane;	GO:0004190|aspartic-type endopeptidase activity;	.	.
Potri.013G103800.v3.0	272	305	221	145.8404031	14	15	20	18.10022624	4.177935825	3.46E-63	5.73E-62	up	yes	Potri.013G103800	protein_coding	chrChr13:11750656-11755168:+	gi|566200421|ref|XP_006376132.1|	1622	0	hypothetical protein POPTR_0013s10080g [Populus trichocarpa]	gi|566200420|ref|XM_006376070.1|	1002	0	Populus trichocarpa hypothetical protein (POPTR_0013s10080g) mRNA, complete cds	Q15GI4	400	3.00E-136	Eugenol synthase 1	BH0305	51.6	1.00E-06	COG0702	pfam05368	NmrA	NmrA-like family. NmrA is a negative transcriptional regulator involved in the post-translational modification of the transcription factor AreA. NmrA is part of a system controlling nitrogen metabolite repression in fungi. This family only contains a few sequences as iteration results in significant matches to other Rossmann fold families.	GO:0009699|phenylpropanoid biosynthetic process;	.	GO:0016491|oxidoreductase activity;	K17055	EGS1; eugenol synthase [EC:1.1.1.318]
Potri.004G037100.v3.0	295	239	212	136.8993592	17	15	14	18.00445246	4.170281821	1.82E-57	2.68E-56	up	yes	Potri.004G037100	protein_coding	chrChr04:2791335-2792981:+	gi|566164769|ref|XP_002305008.2|	1375	0	hypothetical protein POPTR_0004s03730g [Populus trichocarpa]	gi|566164768|ref|XM_002304972.2|	1374	0	Populus trichocarpa hypothetical protein (POPTR_0004s03730g) mRNA, complete cds	.	.	.	.	.	.	.	.	pfam02516	STT3	Oligosaccharyl transferase STT3 subunit. This family consists of the oligosaccharyl transferase STT3 subunit and related proteins. The STT3 subunit is part of the oligosaccharyl transferase (OTase) complex of proteins and is required for its activity. In eukaryotes, OTase transfers a lipid-linked core-oligosaccharide to selected asparagine residues in the ER. In the archaea STT3 occurs alone, rat…	.	.	.	.	.
Potri.006G221800.v3.0	272	282	247	147.5045039	12	15	23	17.93954412	4.165071324	4.64E-63	7.67E-62	up	yes	Potri.006G221800	protein_coding	chrChr06:23443226-23444720:+	gi|224088758|ref|XP_002308528.1|	958	4.00E-151	hypothetical protein POPTR_0006s23840g [Populus trichocarpa]	gi|566177825|ref|XM_002308492.2|	898	0	Populus trichocarpa hypothetical protein (POPTR_0006s23840g) mRNA, complete cds	P10290	152	8.00E-47	Anthocyanin regulatory C1 protein	ECU11g1690	57.4	1.00E-15	COG5147	pfam00249	Myb_DNA-binding	Myb-like DNA-binding domain. This family contains the DNA binding domains from Myb proteins, as well as the SANT domain family.	GO:0006355|regulation of transcription, DNA-templated;GO:0006351|transcription, DNA-templated;	GO:0005634|nucleus;	GO:0003677|DNA binding;	K09422	MYBP; myb proto-oncogene protein, plant
Potri.011G162000.v3.0	247	185	150	106.1506342	12	14	10	17.90463545	4.162261239	2.96E-44	3.32E-43	up	yes	Potri.011G162000	protein_coding	chrChr11:18000814-18004181:-	gi|566195836|ref|XP_006377936.1|	1256	7.00E-171	FATTY ACID HYDROXYLASE 1 family protein [Populus trichocarpa]	gi|566195835|ref|XM_006377874.1|	1134	0	Populus trichocarpa FATTY ACID HYDROXYLASE 1 family protein (POPTR_0011s16470g) mRNA, complete cds	O48916	374	2.00E-127	Dihydroceramide fatty acyl 2-hydroxylase FAH1	YMR272c_2	128	4.00E-34	COG3000	pfam04116	FA_hydroxylase	Fatty acid hydroxylase superfamily. This superfamily includes fatty acid and carotene hydroxylases and sterol desaturases. Beta-carotene hydroxylase is involved in zeaxanthin synthesis by hydroxylating beta-carotene, but the enzyme may be involved in other pathways. This family includes C-5 sterol desaturase and C-4 sterol methyl oxidase. Members of this family are involved in cholesterol biosynt…	GO:0006633|fatty acid biosynthetic process;GO:0000038|very long-chain fatty acid metabolic process;	GO:0005783|endoplasmic reticulum;GO:0005789|endoplasmic reticulum membrane;GO:0016021|integral component of membrane;	GO:0005506|iron ion binding;GO:0016491|oxidoreductase activity;	.	.
Potri.006G048600.v3.0	171	183	172	97.51560354	14	11	8	17.78083929	4.152251518	8.26E-42	8.72E-41	up	yes	Potri.006G048600	protein_coding	chrChr06:3479534-3487214:-	gi|743909223|ref|XP_011048086.1|	4891	0	PREDICTED: kinesin-4 [Populus euphratica]	gi|743909222|ref|XM_011049784.1|	1792	0	PREDICTED: Populus euphratica kinesin-4 (LOC105142249), mRNA	F4J2M6	877	0	Kinesin-like protein KIN-14L	SPAC664.10	253	8.00E-70	COG5059	pfam00225	Kinesin	Kinesin motor domain.	GO:0007018|microtubule-based movement;	GO:0005871|kinesin complex;	GO:0005524|ATP binding;GO:0016887|ATPase activity;GO:0003777|microtubule motor activity;	K10406	KIFC2_3; kinesin family member C2/C3
Potri.007G136100.v3.0	5	3	1	1.501389216	0	0	0	17.50193256	4.129442328	0.021810264	0.037844054	up	yes	Potri.007G136100	protein_coding	chrChr07:14874618-14875127:-	gi|224092934|ref|XP_002309761.1|	567	2.00E-72	DNAJ chaperone C-terminal domain-containing family protein [Populus trichocarpa]	gi|156447069|gb|AC209002.1|	464	0	Populus trichocarpa clone POP040-E22, complete sequence	P59910	98.6	1.00E-23	DnaJ homolog subfamily B member 13	.	.	.	.	pfam01556	CTDII	DnaJ C terminal domain. This family consists of the C terminal region form the DnaJ protein. It is always found associated with pfam00226 and pfam00684. DnaJ is a chaperone associated with the Hsp70 heat-shock system involved in protein folding and renaturation after stress. The two C-terminal domains CTDI and this, CTDII, are necessary for maintaining the J-domains in their specific relative pos…	GO:0006457|protein folding;	GO:0005930|axoneme;GO:0005737|cytoplasm;GO:0036126|sperm flagellum;	.	K09519	DNAJB13; DnaJ homolog subfamily B member 13
Potri.001G339500.v3.0	21	34	25	14.84122127	4	1	0	17.49537876	4.128901993	1.10E-07	3.31E-07	up	yes	Potri.001G339500	protein_coding	chrChr01:34316929-34319080:+	gi|224060175|ref|XP_002300069.1|	1990	0	pectate lyase family protein [Populus trichocarpa]	gi|566153023|ref|XM_002300033.2|	1610	0	Populus trichocarpa pectate lyase family protein (POPTR_0001s35960g) mRNA, complete cds	O24554	634	0	Pectate lyase	TM0433	90.1	1.00E-18	COG3866	pfam00544	Pec_lyase_C	Pectate lyase. This enzyme forms a right handed beta helix structure. Pectate lyase is an enzyme involved in the maceration and soft rotting of plant tissue.	GO:0045490|pectin catabolic process;	.	GO:0046872|metal ion binding;GO:0030570|pectate lyase activity;	.	.
Potri.011G108300.v3.0	658	690	520	342.0671752	33	53	33	17.48857439	4.128340785	5.82E-139	2.96E-137	up	yes	Potri.011G108300	protein_coding	chrChr11:13259159-13261171:+	gi|224114768|ref|XP_002316852.1|	2862	0	hypothetical protein POPTR_0011s10950g [Populus trichocarpa]	gi|160421806|gb|AC214595.1|	2013	0	Populus trichocarpa clone POP016-E18, complete sequence	P43309	588	0	Polyphenol oxidase, chloroplastic	.	.	.	.	pfam00264	Tyrosinase	Common central domain of tyrosinase. This family also contains polyphenol oxidases and some hemocyanins. Binds two copper ions via two sets of three histidines. This family is related to pfam00372.	GO:0046148|pigment biosynthetic process;	GO:0009543|chloroplast thylakoid lumen;	GO:0004097|catechol oxidase activity;GO:0046872|metal ion binding;	K00422	E1.10.3.1; polyphenol oxidase [EC:1.10.3.1]
Potri.002G252200.v3.0	378	361	292	189.2119311	13	28	27	16.96457626	4.08445349	2.74E-80	6.09E-79	up	yes	Potri.002G252200	protein_coding	chrChr02:24159887-24160582:+	gi|224065474|ref|XP_002301826.1|	190	2.00E-15	glycine-rich family protein [Populus trichocarpa]	gi|566159918|ref|XM_002301790.2|	387	0	Populus trichocarpa glycine-rich family protein (POPTR_0002s25350g) mRNA, complete cds	.	.	.	.	.	.	.	.	pfam08394	Arc_trans_TRASH	Archaeal TRASH domain. This region is found in the C-terminus of a number of archaeal transcriptional regulators. It is thought to function as a metal-sensing regulatory module.	.	.	.	.	.
Potri.007G015700.v3.0	493	482	380	249.1945183	31	32	27	16.71614174	4.063169992	6.55E-104	2.05E-102	up	yes	Potri.007G015700	protein_coding	chrChr07:1160229-1165274:+	gi|743839318|ref|XP_011025911.1|	1837	0	PREDICTED: probable pectinesterase 53 [Populus euphratica]	gi|743839317|ref|XM_011027609.1|	1567	0	PREDICTED: Populus euphratica probable pectinesterase 53 (LOC105126674), mRNA	Q8VYZ3	472	2.00E-159	Probable pectinesterase 53	CAC3373	158	4.00E-42	COG4677	pfam01095	Pectinesterase	Pectinesterase.	GO:0042545|cell wall modification;GO:0045490|pectin catabolic process;	GO:0005618|cell wall;GO:0005737|cytoplasm;GO:0005576|extracellular region;	GO:0045330|aspartyl esterase activity;GO:0030599|pectinesterase activity;	K01051	E3.1.1.11; pectinesterase [EC:3.1.1.11]
Potri.004G020100.v3.0	115	122	80	57.90122714	7	7	7	16.6831717	4.060321686	1.76E-26	1.25E-25	up	yes	Potri.004G020100	protein_coding	chrChr04:1351318-1352421:-	gi|224078668|ref|XP_002305600.1|	928	2.00E-123	hypothetical protein POPTR_0004s01950g [Populus trichocarpa]	gi|224078667|ref|XM_002305564.1|	924	0	Populus trichocarpa hypothetical protein (POPTR_0004s01950g) mRNA, complete cds	Q9SSK5	54.7	8.00E-08	MLP-like protein 43	.	.	.	.	pfam00407	Bet_v_1	Pathogenesis-related protein Bet v I family. This family is named after Bet v 1, the major birch pollen allergen. This protein belongs to family 10 of plant pathogenesis-related proteins (PR-10), cytoplasmic proteins of 15-17 kd that are wide-spread among dicotyledonous plants. In recent years, a number of diverse plant proteins with low sequence similarity to Bet v 1 was identified. A classifica…	GO:0006952|defense response;GO:0009607|response to biotic stimulus;	GO:0009507|chloroplast;	.	.	.
Potri.002G106000.v3.0	501	592	419	277.5000392	30	43	28	16.64868699	4.057336497	3.77E-111	1.32E-109	up	yes	Potri.002G106000	protein_coding	chrChr02:7736759-7745350:+	gi|224063323|ref|XP_002301096.1|	6845	0	hypothetical protein POPTR_0002s10620g [Populus trichocarpa]	gi|566157310|ref|XM_002301060.2|	4135	0	Populus trichocarpa hypothetical protein (POPTR_0002s10620g) mRNA, complete cds	F4K0J3	1548	0	Kinesin-like protein KIN-4C	ECU05g0060_1	241	1.00E-67	COG5059	pfam00225	Kinesin	Kinesin motor domain.	GO:0071555|cell wall organization;GO:0007018|microtubule-based movement;	GO:0005871|kinesin complex;GO:0005874|microtubule;GO:0009506|plasmodesma;	GO:0005524|ATP binding;GO:0016887|ATPase activity;GO:0003777|microtubule motor activity;	K10395	KIF4_21_27; kinesin family member 4/21/27
Potri.008G190000.v3.0	1793	1966	1491	965.164829	83	124	147	16.56075928	4.049696914	0	0	up	yes	Potri.008G190000	protein_coding	chrChr08:13182816-13185604:+	gi|566184883|ref|XP_002311777.2|	3266	0	hypothetical protein POPTR_0008s19430g [Populus trichocarpa]	gi|566184882|ref|XM_002311741.2|	2638	0	Populus trichocarpa hypothetical protein (POPTR_0008s19430g) mRNA, complete cds	P92990	842	0	Polygalacturonase 1 beta-like protein 3	.	.	.	.	pfam03181	BURP	BURP domain. The BURP domain is found at the C-terminus of several different plant proteins. It was named after the proteins in which it was first identified: the BNM2 clone-derived protein from Brassica napus; USPs and USP-like proteins; RD22 from Arabidopsis thaliana; and PG1beta from Lycopersicon esculentum. This domain is around 230 amino acid residues long. It possesses the following conserv…	.	GO:0048046|apoplast;GO:0005618|cell wall;	.	.	.
Potri.T051100.v3.0	139	138	95	67.93592936	5	8	12	16.53996133	4.047883956	1.54E-30	1.23E-29	up	yes	Potri.T051100	protein_coding	chrscaffold_48:79703-83682:+	gi|566258642|ref|XP_006388900.1|	2112	0	hypothetical protein POPTR_0078s00200g [Populus trichocarpa]	gi|566258641|ref|XM_006388838.1|	1738	0	Populus trichocarpa hypothetical protein (POPTR_0078s00200g) mRNA, complete cds	B8AQW7	225	2.00E-65	Patatin-like protein 1	all2302	82.4	4.00E-16	COG3621	pfam01734	Patatin	Patatin-like phospholipase. This family consists of various patatin glycoproteins from plants. The patatin protein accounts for up to 40% of the total soluble protein in potato tubers. Patatin is a storage protein but it also has the enzymatic activity of lipid acyl hydrolase, catalyzing the cleavage of fatty acids from membrane lipids. Members of this family have been found also in vertebrates.	GO:0006952|defense response;GO:0016042|lipid catabolic process;	.	GO:0016787|hydrolase activity;	.	.
Potri.009G126000.v3.0	419	385	329	208.7239409	16	28	33	16.46891218	4.041673359	7.41E-87	1.83E-85	up	yes	Potri.009G126000	protein_coding	chrChr09:10449403-10450241:-	gi|566187719|ref|XP_002313002.2|	698	1.00E-89	hypothetical protein POPTR_0009s12890g [Populus trichocarpa]	gi|566187718|ref|XM_002312966.2|	803	0	Populus trichocarpa hypothetical protein (POPTR_0009s12890g) mRNA, complete cds	O65695	180	2.00E-55	Auxin-responsive protein SAUR50	.	.	.	.	pfam02519	Auxin_inducible	Auxin responsive protein. This family consists of the protein products of the ARG7 auxin responsive genes family none of which have any identified functional role.	GO:0009733|response to auxin;	.	.	K14488	SAUR; SAUR family protein
Potri.005G061000.v3.0	63	69	57	34.91276813	2	1	10	16.27418081	4.024513019	5.37E-16	2.56E-15	up	yes	Potri.005G061000	protein_coding	chrChr05:4279029-4283064:+	gi|566169795|ref|XP_002306239.2|	2150	0	transducin family protein [Populus trichocarpa]	gi|566169794|ref|XM_002306203.2|	1880	0	Populus trichocarpa transducin family protein (POPTR_0005s06230g) mRNA, complete cds	Q3MKM6	512	2.00E-174	U3 snoRNP-associated protein-like EMB2271	.	.	.	.	pfam00400	WD40	WD domain, G-beta repeat.	GO:0006364|rRNA processing;	GO:0080008|Cul4-RING E3 ubiquitin ligase complex;GO:0005730|nucleolus;GO:0032040|small-subunit processome;	GO:0030515|snoRNA binding;	K14793	RRP9; ribosomal RNA-processing protein 9
Potri.007G076700.v3.0	718	735	603	379.5427589	43	58	40	16.26295583	4.023517589	3.46E-152	1.98E-150	up	yes	Potri.007G076700	protein_coding	chrChr07:10062960-10068965:+	gi|224096482|ref|XP_002310626.1|	4081	0	ribonucleotide reductase large subunit B family protein [Populus trichocarpa]	gi|566180011|ref|XM_002310590.2|	2530	0	Populus trichocarpa ribonucleotide reductase large subunit B family protein (POPTR_0007s07100g) mRNA, complete cds	Q9SJ20	1415	0	Ribonucleoside-diphosphate reductase large subunit	SPAC1F7.05	1070	0	COG0209	pfam02867	Ribonuc_red_lgC	Ribonucleotide reductase, barrel domain.	GO:0009202|deoxyribonucleoside triphosphate biosynthetic process;GO:0009263|deoxyribonucleotide biosynthetic process;GO:0006260|DNA replication;GO:0046686|response to cadmium ion;	GO:0005971|ribonucleoside-diphosphate reductase complex;	GO:0005524|ATP binding;GO:0004748|ribonucleoside-diphosphate reductase activity, thioredoxin disulfide as acceptor;	K10807	RRM1; ribonucleoside-diphosphate reductase subunit M1 [EC:1.17.4.1]
Potri.015G074600.v3.0	1473	1583	1301	804.8918037	75	113	113	16.19967547	4.017893006	1.83E-290	3.50E-288	up	yes	Potri.015G074600	protein_coding	chrChr15:9950835-9953779:+	gi|566206628|ref|XP_002321586.2|	2313	0	hypothetical protein POPTR_0015s08590g [Populus trichocarpa]	gi|566206627|ref|XM_002321550.2|	1279	0	Populus trichocarpa hypothetical protein (POPTR_0015s08590g) mRNA, complete cds	O64411	438	1.00E-144	Polyamine oxidase	Rv3170	55.5	4.00E-07	COG1231	pfam01593	Amino_oxidase	Flavin containing amine oxidoreductase. This family consists of various amine oxidases, including maze polyamine oxidase (PAO) and various flavin containing monoamine oxidases (MAO). The aligned region includes the flavin binding site of these enzymes. The family also contains phytoene dehydrogenases and related enzymes. In vertebrates MAO plays an important role regulating the intracellular leve…	.	.	GO:0052898|N1-acetylspermidine:oxygen oxidoreductase (propane-1,3-diamine-forming) activity;GO:0052893|N1-acetylspermine:oxygen oxidoreductase (propane-1,3-diamine-forming) activity;GO:0052897|N8-acetylspermidine:oxygen oxidoreductase (propane-1,3-diamine-forming) activity;GO:0052896|spermidine oxidase (propane-1,3-diamine-forming) activity;GO:0052900|spermine oxidase (propane-1,3-diamine-forming…	K13366	MPAO, PAO1; polyamine oxidase [EC:1.5.3.14 1.5.3.16 1.5.3.-]
Potri.003G195500.v3.0	4252	4310	3452	2216.784587	254	314	266	16.02544639	4.002292639	0	0	up	yes	Potri.003G195500	protein_coding	chrChr03:19863596-19866445:-	gi|566163557|ref|XP_002303933.2|	2247	0	hypothetical protein POPTR_0003s19490g [Populus trichocarpa]	gi|566163556|ref|XM_002303897.2|	1825	0	Populus trichocarpa hypothetical protein (POPTR_0003s19490g) mRNA, complete cds	O04496	384	5.00E-125	Aspartyl protease AED3	.	.	.	.	pfam14541	TAXi_C	Xylanase inhibitor C-terminal. The N- and C-termini of the members of this family are jointly necessary for creating the catalytic pocket necessary for cleaving xylasnase. Phytopathogens produce xylanase that destroys plant cells, so its destruction through proteolysis is vital for plant-survival.	GO:0030163|protein catabolic process;GO:0006508|proteolysis;GO:0009627|systemic acquired resistance;	GO:0048046|apoplast;GO:0005618|cell wall;GO:0009505|plant-type cell wall;	GO:0004190|aspartic-type endopeptidase activity;GO:0000166|nucleotide binding;	.	.
Potri.002G235500.v3.0	436	510	371	242.4102078	24	45	23	15.97757008	3.997976111	2.91E-96	8.23E-95	up	yes	Potri.002G235500	protein_coding	chrChr02:22906417-22916538:-	gi|224069597|ref|XP_002303008.1|	6143	0	PHRAGMOPLAST-ASSOCIATED KINESIN-RELATED protein 1 [Populus trichocarpa]	gi|743933569|ref|XM_011012803.1|	3579	0	PREDICTED: Populus euphratica kinesin-like protein KIN12B (LOC105115785), transcript variant X1, mRNA	Q8L7Y8	1386	0	Kinesin-like protein KIN-12B	SPAC1834.07	241	3.00E-67	COG5059	pfam06548	Kinesin-related	Kinesin-related. This family represents a region within kinesin-related proteins from higher plants. Many family members also contain the pfam00225 domain. Kinesins are ATP-driven microtubule motor proteins that produce directed force. Some family members are associated with the phragmoplast, a structure composed mainly of microtubules that executes cytokinesis in higher plants.	GO:0055046|microgametogenesis;GO:0007018|microtubule-based movement;GO:0080175|phragmoplast microtubule organization;	GO:0005871|kinesin complex;GO:0005874|microtubule;GO:0009524|phragmoplast;	GO:0005524|ATP binding;GO:0003777|microtubule motor activity;	K10400	KIF15; kinesin family member 15
Potri.004G086000.v3.0	86	92	75	46.65813905	2	11	5	15.84793085	3.986222585	2.11E-21	1.25E-20	up	yes	Potri.004G086000	protein_coding	chrChr04:7144357-7146203:+	gi|566165583|ref|XP_002305881.2|	1249	9.00E-167	hypothetical protein POPTR_0004s08440g [Populus trichocarpa]	gi|566165582|ref|XM_002305845.2|	1099	0	Populus trichocarpa hypothetical protein (POPTR_0004s08440g) mRNA, complete cds	Q0WPN8	300	9.00E-96	Cysteine-rich repeat secretory protein 60	.	.	.	.	pfam01657	Stress-antifung	Salt stress response/antifungal. This domain is often found in association with the kinase domains pfam00069 or pfam07714. In many proteins it is duplicated. It contains six conserved cysteines which are involved in disulphide bridges. It has a role in salt stress response and has antifungal activity.	GO:0006810|transport;GO:0016032|viral process;	GO:0016021|integral component of membrane;GO:0009506|plasmodesma;	.	.	.
Potri.001G028200.v3.0	5340	5372	4413	2795.839166	278	442	359	15.69111253	3.971875741	0	0	up	yes	Potri.001G028200	protein_coding	chrChr01:2103048-2105762:+	gi|224057272|ref|XP_002299201.1|	2015	0	aspartyl protease family protein [Populus trichocarpa]	gi|224057271|ref|XM_002299165.1|	1663	0	Populus trichocarpa aspartyl protease family protein (POPTR_0001s06560g) mRNA, complete cds	O04496	360	3.00E-116	Aspartyl protease AED3	.	.	.	.	pfam14541	TAXi_C	Xylanase inhibitor C-terminal. The N- and C-termini of the members of this family are jointly necessary for creating the catalytic pocket necessary for cleaving xylasnase. Phytopathogens produce xylanase that destroys plant cells, so its destruction through proteolysis is vital for plant-survival.	GO:0030163|protein catabolic process;GO:0006508|proteolysis;GO:0009627|systemic acquired resistance;	GO:0048046|apoplast;GO:0005618|cell wall;GO:0009505|plant-type cell wall;	GO:0004190|aspartic-type endopeptidase activity;GO:0000166|nucleotide binding;	.	.
Potri.008G089500.v3.0	134	135	123	72.88000554	7	4	17	15.65596745	3.968640757	5.01E-31	4.08E-30	up	yes	Potri.008G089500	protein_coding	chrChr08:5607470-5609237:-	gi|224101385|ref|XP_002312257.1|	2805	0	SET domain-containing family protein [Populus trichocarpa]	gi|566183043|ref|XM_002312221.2|	1713	0	Populus trichocarpa SET domain-containing family protein (POPTR_0008s08900g) mRNA, complete cds	Q54D67	70.9	6.00E-12	SET and MYND domain-containing protein DDB_G0292454	YPL165c	64.3	3.00E-10	COG2940	pfam00856	SET	SET domain. SET domains are protein lysine methyltransferase enzymes. SET domains appear to be protein-protein interaction domains. It has been demonstrated that SET domains mediate interactions with a family of proteins that display similarity with dual-specificity phosphatases (dsPTPases). A subset of SET domains have been called PR domains. These domains are divergent in sequence from other SE…	.	.	GO:0046872|metal ion binding;GO:0008168|methyltransferase activity;	.	.
Potri.005G067000.v3.0	433	428	346	222.9424819	21	37	29	15.50309264	3.954484136	9.08E-94	2.48E-92	up	yes	Potri.005G067000	protein_coding	chrChr05:4809893-4814274:-	gi|566169903|ref|XP_002307046.2|	3482	0	hypothetical protein POPTR_0005s06800g [Populus trichocarpa]	gi|566169902|ref|XM_002307010.2|	2599	0	Populus trichocarpa hypothetical protein (POPTR_0005s06800g) mRNA, complete cds	Q9ZUE0	265	2.00E-74	Proline-rich receptor-like protein kinase PERK12	.	.	.	.	pfam00069	Pkinase	Protein kinase domain.	GO:0032502|developmental process;	GO:0016021|integral component of membrane;GO:0005886|plasma membrane;	GO:0005524|ATP binding;GO:0004674|protein serine/threonine kinase activity;	.	.
Potri.T124900.v3.0	169	198	145	94.58046414	11	11	15	15.38389397	3.943348819	1.73E-41	1.82E-40	up	yes	Potri.T124900	protein_coding	chrscaffold_219:63391-64187:-	gi|566211638|ref|XP_006372871.1|	785	4.00E-102	hypothetical protein POPTR_0017s05860g [Populus trichocarpa]	gi|160688510|gb|AC214628.1|	770	0	Populus trichocarpa clone POP040-F15, complete sequence	Q9SRR7	188	6.00E-58	Calmodulin-like protein 3	SPAC3A12.14	65.1	2.00E-12	COG5126	pfam13499	EF-hand_7	EF-hand domain pair.	.	GO:0005777|peroxisome;	GO:0005509|calcium ion binding;	K13448	CML; calcium-binding protein CML
Potri.006G046600.v3.0	365	341	301	186.9662154	18	26	31	15.0256095	3.909351609	5.26E-78	1.13E-76	up	yes	Potri.006G046600	protein_coding	chrChr06:3301120-3304000:-	gi|224090051|ref|XP_002308922.1|	1482	0	phosphate translocator-related family protein [Populus trichocarpa]	gi|566174451|ref|XM_002308886.2|	1254	0	Populus trichocarpa phosphate translocator-related family protein (POPTR_0006s04520g) mRNA, complete cds	Q9SS40	507	1.00E-177	Probable sugar phosphate/phosphate translocator At3g10290	.	.	.	.	pfam03151	TPT	Triose-phosphate Transporter family. This family includes transporters with a specificity for triose phosphate.	GO:0008643|carbohydrate transport;	GO:0016021|integral component of membrane;	.	.	.
Potri.004G123200.v3.0	263	246	193	129.7268011	16	20	16	15.00587166	3.90745522	6.12E-56	8.80E-55	up	yes	Potri.004G123200	protein_coding	chrChr04:11774723-11776391:-	gi|224080161|ref|XP_002306037.1|	1014	1.00E-133	expansin S1 precursor family protein [Populus trichocarpa]	gi|566166226|ref|XM_002306001.2|	1170	0	Populus trichocarpa expansin S1 precursor family protein (POPTR_0004s12200g) mRNA, complete cds	Q9C554	333	1.00E-110	Expansin-A1	.	.	.	.	pfam01357	Pollen_allerg_1	Pollen allergen. This family contains allergens lol PI, PII and PIII from Lolium perenne.	GO:0009664|plant-type cell wall organization;	GO:0005618|cell wall;GO:0005576|extracellular region;GO:0016020|membrane;	.	.	.
Potri.001G028500.v3.0	385	394	260	190.748258	20	29	28	14.95704171	3.902752954	5.23E-78	1.13E-76	up	yes	Potri.001G028500	protein_coding	chrChr01:2123330-2126458:+	gi|566147580|ref|XP_002299198.2|	676	4.00E-85	hypothetical protein POPTR_0001s06590g [Populus trichocarpa]	gi|156564451|gb|AC209106.1|	606	0	Populus trichocarpa clone POP088-K11, complete sequence	Q9M7X9	175	1.00E-51	Thioredoxin-like protein CITRX, chloroplastic	BB0061	60.5	1.00E-10	COG0526	pfam00085	Thioredoxin	Thioredoxin. Thioredoxins are small enzymes that participate in redox reactions, via the reversible oxidation of an active centre disulfide bond. Some members with only the active site are not separated from the noise.	GO:0006915|apoptotic process;GO:0008219|cell death;GO:0045454|cell redox homeostasis;GO:0034599|cellular response to oxidative stress;GO:0006952|defense response;GO:0006662|glycerol ether metabolic process;GO:0034051|negative regulation of plant-type hypersensitive response;GO:0009657|plastid organization;GO:0006457|protein folding;GO:0031347|regulation of defense response;GO:0000103|sulfate assi…	GO:0009507|chloroplast;GO:0009295|nucleoid;GO:0009579|thylakoid;	GO:0016671|oxidoreductase activity, acting on a sulfur group of donors, disulfide as acceptor;GO:0015035|protein disulfide oxidoreductase activity;GO:0047134|protein-disulfide reductase activity;	.	.
Potri.001G169000.v3.0	6972	6906	5613	3612.151485	410	568	480	14.90937197	3.898147583	0	0	up	yes	Potri.001G169000	protein_coding	chrChr01:14219811-14221127:-	gi|566149485|ref|XP_002299591.2|	1010	1.00E-133	germin-like family protein [Populus trichocarpa]	gi|566149484|ref|XM_002299555.2|	1314	0	Populus trichocarpa germin-like family protein (POPTR_0001s16910g) mRNA, complete cds	Q9ZRA4	263	5.00E-84	Auxin-binding protein ABP19a	.	.	.	.	pfam00190	Cupin_1	Cupin. This family represents the conserved barrel domain of the 'cupin' superfamily ('cupa' is the Latin term for a small barrel). This family contains 11S and 7S plant seed storage proteins, and germins. Plant seed storage proteins provide the major nitrogen source for the developing plant.	GO:0009734|auxin-activated signaling pathway;	GO:0048046|apoplast;GO:0005618|cell wall;	GO:0030145|manganese ion binding;GO:0045735|nutrient reservoir activity;	.	.
Potri.012G145200.v3.0	654	794	578	374.795808	39	69	44	14.88604336	3.895888438	3.26E-138	1.65E-136	up	yes	Potri.012G145200	protein_coding	chrChr12:15720594-15723878:+	gi|566198199|ref|XP_002318801.2|	2959	0	hypothetical protein POPTR_0012s12820g [Populus trichocarpa]	gi|566198198|ref|XM_002318765.2|	2536	0	Populus trichocarpa hypothetical protein (POPTR_0012s12820g) mRNA, complete cds	Q5XVH5	99	2.00E-20	Uncharacterized protein At1g65710	.	.	.	.	pfam05287	PMG	PMG protein. This family consists of several mouse anagen-specific protein mKAP13 (PMG1 and PMG2). PMG1 and 2 contain characteristic repeats reminiscent of the keratin-associated proteins (KAPs). Both genes are expressed in growing hair follicles in skin as well as in sebaceous and eccrine sweat glands. Interestingly, expression is also detected in the mammary epithelium where it is limited to th…	GO:0042981|regulation of apoptotic process;GO:2000772|regulation of cellular senescence;	GO:0005730|nucleolus;	GO:0003723|RNA binding;	.	.
Potri.013G018200.v3.0	747	688	480	352.049306	41	56	46	14.82820394	3.890271957	5.71E-130	2.59E-128	up	yes	Potri.013G018200	protein_coding	chrChr13:1192789-1193978:+	gi|566198902|ref|XP_002318994.2|	441	5.00E-51	hypothetical protein POPTR_0013s01890g [Populus trichocarpa]	gi|566198901|ref|XM_002318958.2|	779	0	Populus trichocarpa hypothetical protein (POPTR_0013s01890g) mRNA, complete cds	P25469	157	8.00E-46	Histone H2A.1	SPCC622.08c	126	1.00E-34	COG5262	pfam00125	Histone	Core histone H2A/H2B/H3/H4.	GO:0006342|chromatin silencing;	GO:0000790|nuclear chromatin;GO:0000786|nucleosome;	GO:0003677|DNA binding;	K11251	H2A; histone H2A
Potri.005G018800.v3.0	289	276	231	147.7481913	18	21	21	14.78330603	3.885897034	2.14E-63	3.56E-62	up	yes	Potri.005G018800	protein_coding	chrChr05:1493501-1497120:+	gi|566168859|ref|XP_006382406.1|	1649	0	calreticulin family protein [Populus trichocarpa]	gi|743883126|ref|XM_011038643.1|	1341	0	PREDICTED: Populus euphratica calreticulin-like (LOC105134292), mRNA	P93508	588	0	Calreticulin	.	.	.	.	pfam00262	Calreticulin	Calreticulin family.	GO:0006457|protein folding;	GO:0005788|endoplasmic reticulum lumen;	GO:0005509|calcium ion binding;GO:0030246|carbohydrate binding;	K08057	CALR; calreticulin
Potri.009G165800.v3.0	298	245	253	148.6845101	16	33	12	14.6977963	3.877527957	1.99E-56	2.88E-55	up	yes	Potri.009G165800	protein_coding	chrChr09:12650485-12654072:-	gi|566188358|ref|XP_002312806.2|	2139	0	hypothetical protein POPTR_0009s16730g [Populus trichocarpa]	gi|566188357|ref|XM_002312770.2|	1579	0	Populus trichocarpa hypothetical protein (POPTR_0009s16730g) mRNA, complete cds	Q9SFW6	488	1.00E-167	Cyclin-B2-4	SPBC582.03	199	4.00E-56	COG5024	pfam00134	Cyclin_N	Cyclin, N-terminal domain. Cyclins regulate cyclin dependent kinases (CDKs). Human cyclin-O is a Uracil-DNA glycosylase that is related to other cyclins. Cyclins contain two domains of similar all-alpha fold, of which this family corresponds with the N-terminal domain.	GO:0007049|cell cycle;GO:0051301|cell division;	GO:0005634|nucleus;	.	K05868	CCNB; cyclin B
Potri.001G237600.v3.0	2115	2199	1584	1089.448895	120	170	161	14.53857033	3.861813502	0	0	up	yes	Potri.001G237600	protein_coding	chrChr01:24879592-24880755:-	gi|224054799|ref|XP_002298366.1|	1322	0	osmotin-like family protein [Populus trichocarpa]	gi|566150760|ref|XM_002298330.2|	1073	0	Populus trichocarpa osmotin-like family protein (POPTR_0001s24430g) mRNA, complete cds	Q41350	377	1.00E-128	Osmotin-like protein	.	.	.	.	pfam00314	Thaumatin	Thaumatin family.	.	GO:0005618|cell wall;GO:0005576|extracellular region;	.	.	.
Potri.013G009600.v3.0	283	307	211	147.8821606	19	18	24	14.53743253	3.861700591	3.53E-62	5.74E-61	up	yes	Potri.013G009600	protein_coding	chrChr13:618175-619114:+	.	.	.	.	gi|566198746|ref|XM_002318921.2|	564	0	Populus trichocarpa calreticulin family protein (POPTR_0013s01090g) mRNA, complete cds	.	.	.	.	.	.	.	.	pfam07787	DUF1625	Protein of unknown function (DUF1625). Sequences making up this family are derived from hypothetical proteins expressed by both prokaryotic and eukaryotic species. The region in question is approximately 250 residues long.	.	.	.	.	.
Potri.018G135300.v3.0	158	140	111	75.87245999	14	7	10	14.52884501	3.860848113	1.14E-32	9.73E-32	up	yes	Potri.018G135300	protein_coding	chrChr18:15496965-15500101:+	gi|224142665|ref|XP_002324675.1|	1886	0	hypothetical protein POPTR_0018s13510g [Populus trichocarpa]	gi|566215678|ref|XM_002324639.2|	1066	0	Populus trichocarpa hypothetical protein (POPTR_0018s13510g) mRNA, complete cds	P43293	313	5.00E-102	Probable serine/threonine-protein kinase NAK	L138452_1	98.6	5.00E-22	COG0515	pfam00069	Pkinase	Protein kinase domain.	.	GO:0005886|plasma membrane;	GO:0005524|ATP binding;GO:0004674|protein serine/threonine kinase activity;	.	.
Potri.012G105500.v3.0	335	317	233	163.5427555	22	26	20	14.42254499	3.850253859	3.74E-68	6.82E-67	up	yes	Potri.012G105500	protein_coding	chrChr12:12946311-12949727:+	gi|566197828|ref|XP_002318164.2|	2495	0	hypothetical protein POPTR_0012s10730g [Populus trichocarpa]	gi|743899328|ref|XM_011044646.1|	1814	0	PREDICTED: Populus euphratica serine carboxypeptidase-like 45 (LOC105138541), mRNA	Q93Y09	751	0	Serine carboxypeptidase-like 45	YBR139w	170	8.00E-45	COG2939	pfam00450	Peptidase_S10	Serine carboxypeptidase.	GO:0019748|secondary metabolic process;	GO:0005576|extracellular region;GO:0009505|plant-type cell wall;GO:0009506|plasmodesma;	GO:0004180|carboxypeptidase activity;GO:0016747|transferase activity, transferring acyl groups other than amino-acyl groups;	K16297	SCPL-II; serine carboxypeptidase-like clade II [EC:3.4.16.-]
Potri.009G139800.v3.0	56	53	35	26.54062447	5	4	2	14.37627642	3.845618148	8.51E-13	3.47E-12	up	yes	Potri.009G139800	protein_coding	chrChr09:11165587-11167674:-	gi|566187931|ref|XP_002312933.2|	1862	0	hypothetical protein POPTR_0009s14170g [Populus trichocarpa]	gi|566187930|ref|XM_002312897.2|	1420	0	Populus trichocarpa hypothetical protein (POPTR_0009s14170g) mRNA, complete cds	Q7XB10	293	5.00E-92	3'-hydroxy-N-methyl-(S)-coclaurine 4'-O-methyltransferase 2	.	.	.	.	pfam00891	Methyltransf_2	O-methyltransferase. This family includes a range of O-methyltransferases. These enzymes utilize S-adenosyl methionine.	GO:0009820|alkaloid metabolic process;	.	GO:0030784|3'-hydroxy-N-methyl-(S)-coclaurine 4'-O-methyltransferase activity;GO:0008171|O-methyltransferase activity;	.	.
Potri.019G103500.v3.0	335	401	308	194.5910458	27	29	27	13.99836412	3.807186335	5.95E-79	1.29E-77	up	yes	Potri.019G103500	protein_coding	chrChr19:13232661-13236215:+	gi|566243818|ref|XP_006371590.1|	3192	0	DWARF IN LIGHT 2 family protein [Populus trichocarpa]	gi|566243817|ref|XM_006371528.1|	1807	0	Populus trichocarpa DWARF IN LIGHT 2 family protein (POPTR_0019s13450g) mRNA, complete cds	Q6I581	598	0	Jasmonic acid-amido synthetase JAR1	.	.	.	.	pfam03321	GH3	GH3 auxin-responsive promoter.	GO:0009864|induced systemic resistance, jasmonic acid mediated signaling pathway;GO:0009694|jasmonic acid metabolic process;GO:0007275|multicellular organismal development;GO:0040008|regulation of growth;GO:0009733|response to auxin;GO:0009416|response to light stimulus;GO:0009611|response to wounding;	.	GO:0080123|jasmonate-amino synthetase activity;	K14506	JAR1; jasmonic acid-amino synthetase
Potri.002G202400.v3.0	247	236	237	135.1754607	13	23	22	13.99042527	3.806367912	2.82E-55	4.01E-54	up	yes	Potri.002G202400	protein_coding	chrChr02:16423855-16426202:-	gi|224064460|ref|XP_002301487.1|	2627	0	hypothetical protein POPTR_0002s20350g [Populus trichocarpa]	gi|224064459|ref|XM_002301451.1|	1563	0	Populus trichocarpa hypothetical protein (POPTR_0002s20350g) mRNA, complete cds	O81416	817	0	Endoglucanase 17	.	.	.	.	pfam00759	Glyco_hydro_9	Glycosyl hydrolase family 9.	GO:0071555|cell wall organization;GO:0030245|cellulose catabolic process;	GO:0005576|extracellular region;	GO:0008810|cellulase activity;	.	.
Potri.017G099100.v3.0	3485	3704	2902	1876.931378	214	297	294	13.98718768	3.806034013	0	0	up	yes	Potri.017G099100	protein_coding	chrChr17:11685143-11688497:+	gi|566213126|ref|XP_006373391.1|	1958	0	type IIIa membrane protein cp-wap13 [Populus trichocarpa]	gi|566213125|ref|XM_006373329.1|	1696	0	Populus trichocarpa type IIIa membrane protein cp-wap13 (POPTR_0017s13350g) mRNA, complete cds	Q9LFW1	673	0	UDP-arabinopyranose mutase 2	.	.	.	.	pfam03214	RGP	Reversibly glycosylated polypeptide.	GO:0019567|arabinose biosynthetic process;GO:0071555|cell wall organization;GO:0030244|cellulose biosynthetic process;GO:0009832|plant-type cell wall biogenesis;GO:0071669|plant-type cell wall organization or biogenesis;GO:0009555|pollen development;GO:0046686|response to cadmium ion;GO:0009651|response to salt stress;GO:0033356|UDP-L-arabinose metabolic process;	GO:0005618|cell wall;GO:0005829|cytosol;GO:0022626|cytosolic ribosome;GO:0005794|Golgi apparatus;GO:0016020|membrane;	GO:0016866|intramolecular transferase activity;GO:0052691|UDP-arabinopyranose mutase activity;	K13379	RGP, UTM; reversibly glycosylated polypeptide / UDP-arabinopyranose mutase [EC:2.4.1.- 5.4.99.30]
Potri.004G097100.v3.0	40	50	23	20.54018246	1	5	3	13.92540945	3.799647842	4.56E-10	1.59E-09	up	yes	Potri.004G097100	protein_coding	chrChr04:8360765-8364004:+	gi|566165772|ref|XP_002305830.2|	3241	0	hypothetical protein POPTR_0004s09640g [Populus trichocarpa]	gi|743876048|ref|XM_011036793.1|	1742	0	PREDICTED: Populus euphratica probable serine/threonine-protein kinase At1g18390 (LOC105133019), mRNA	Q8VYG0	524	2.00E-175	LEAF RUST 10 DISEASE-RESISTANCE LOCUS RECEPTOR-LIKE PROTEIN KINASE-like 1.3	.	.	.	.	pfam00069	Pkinase	Protein kinase domain.	GO:0007166|cell surface receptor signaling pathway;GO:0046777|protein autophosphorylation;	GO:0016021|integral component of membrane;GO:0005886|plasma membrane;	GO:0005524|ATP binding;GO:0004674|protein serine/threonine kinase activity;	.	.
Potri.013G040800.v3.0	68	60	48	32.70683873	5	4	5	13.92511969	3.799617823	1.66E-15	7.74E-15	up	yes	Potri.013G040800	protein_coding	chrChr13:2846577-2849394:-	gi|566199298|ref|XP_002319640.2|	2133	0	hypothetical protein POPTR_0013s03810g [Populus trichocarpa]	gi|743888877|ref|XM_011040275.1|	1395	0	PREDICTED: Populus euphratica uncharacterized LOC105135412 (LOC105135412), transcript variant X2, mRNA	.	.	.	.	.	.	.	.	pfam02455	Hex_IIIa	Hexon-associated protein (IIIa). The major capsid protein of the adenovirus strain is also known as a hexon. This is a family of hexon-associated proteins (protein IIIa).	.	.	.	.	.
Potri.004G054600.v3.0	264	285	193	137.5325218	21	18	21	13.65651339	3.771517295	3.29E-57	4.81E-56	up	yes	Potri.004G054600	protein_coding	chrChr04:4297668-4299655:-	gi|566165064|ref|XP_002305084.2|	2096	0	hypothetical protein POPTR_0004s05380g [Populus trichocarpa]	gi|566165063|ref|XM_002305048.2|	1581	0	Populus trichocarpa hypothetical protein (POPTR_0004s05380g) mRNA, complete cds	O49523	384	1.00E-126	Phospholipase A1-IIgamma	.	.	.	.	pfam01764	Lipase_3	Lipase (class 3).	GO:0046340|diacylglycerol catabolic process;GO:0019915|lipid storage;GO:0052651|monoacylglycerol catabolic process;GO:0010187|negative regulation of seed germination;	GO:0005737|cytoplasm;	GO:0047372|acylglycerol lipase activity;GO:0008970|phosphatidylcholine 1-acylhydrolase activity;	.	.
Potri.001G289100.v3.0	488	497	445	268.1196511	37	41	39	13.65365908	3.77121573	7.23E-106	2.34E-104	up	yes	Potri.001G289100	protein_coding	chrChr01:29461356-29464948:+	gi|224060931|ref|XP_002300289.1|	4239	0	hypothetical protein POPTR_0001s29610g [Populus trichocarpa]	gi|566151705|ref|XM_002300253.2|	2752	0	Populus trichocarpa hypothetical protein (POPTR_0001s29610g) mRNA, complete cds	.	.	.	.	.	.	.	.	pfam15402	Spc7_N	N-terminus of kinetochore NMS complex subunit Spc7.	.	.	.	.	.
Potri.002G224600.v3.0	567	591	429	294.2332837	26	51	53	13.62890793	3.76859806	2.26E-115	8.43E-114	up	yes	Potri.002G224600	protein_coding	chrChr02:21319641-21322436:-	gi|566159290|ref|XP_002302861.2|	2501	0	glycosyl hydrolase family 17 family protein [Populus trichocarpa]	gi|566159289|ref|XM_002302825.2|	1951	0	Populus trichocarpa glycosyl hydrolase family 17 family protein (POPTR_0002s21700g) mRNA, complete cds	Q8VYE5	357	1.00E-112	Glucan endo-1,3-beta-glucosidase 12	.	.	.	.	pfam00332	Glyco_hydro_17	Glycosyl hydrolases family 17.	GO:0005975|carbohydrate metabolic process;GO:0071555|cell wall organization;GO:0006952|defense response;	GO:0031225|anchored component of membrane;GO:0046658|anchored component of plasma membrane;GO:0005618|cell wall;GO:0005576|extracellular region;	GO:0042973|glucan endo-1,3-beta-D-glucosidase activity;GO:0004553|hydrolase activity, hydrolyzing O-glycosyl compounds;GO:0030247|polysaccharide binding;	.	.
Potri.005G015100.v3.0	908	834	642	443.092307	56	71	70	13.44326347	3.748811502	7.87E-165	5.15E-163	up	yes	Potri.005G015100	protein_coding	chrChr05:1187278-1190862:+	gi|566168859|ref|XP_006382406.1|	1672	0	calreticulin family protein [Populus trichocarpa]	gi|566168858|ref|XM_006382344.1|	1403	0	Populus trichocarpa calreticulin family protein (POPTR_0005s01850g) mRNA, complete cds	P93508	587	0	Calreticulin	.	.	.	.	pfam00262	Calreticulin	Calreticulin family.	GO:0006457|protein folding;	GO:0005788|endoplasmic reticulum lumen;	GO:0005509|calcium ion binding;GO:0030246|carbohydrate binding;	K08057	CALR; calreticulin
Potri.014G071700.v3.0	9849	10250	7972	5232.819241	613	904	826	13.37966276	3.741969847	0	0	up	yes	Potri.014G071700	protein_coding	chrChr14:5793578-5795660:-	gi|224130034|ref|XP_002320736.1|	1773	0	Fasciclin-like arabinogalactan protein 8 precursor [Populus trichocarpa]	gi|566202962|ref|XM_002320700.2|	1637	0	Populus trichocarpa Fasciclin-like arabinogalactan protein 8 precursor (POPTR_0014s06740g) mRNA, complete cds	O22126	494	4.00E-168	Fasciclin-like arabinogalactan protein 8	.	.	.	.	pfam02469	Fasciclin	Fasciclin domain. This extracellular domain is found repeated four times in grasshopper fasciclin I as well as in proteins from mammals, sea urchins, plants, yeast and bacteria.	.	GO:0031225|anchored component of membrane;GO:0046658|anchored component of plasma membrane;GO:0048046|apoplast;GO:0009505|plant-type cell wall;GO:0005886|plasma membrane;	.	.	.
Potri.002G226800.v3.0	280	307	244	155.4976827	26	24	19	13.36896937	3.740816346	5.48E-64	9.22E-63	up	yes	Potri.002G226800	protein_coding	chrChr02:21609893-21615367:+	gi|566159250|ref|XP_002301612.2|	3623	0	early-responsive to dehydration family protein [Populus trichocarpa]	gi|743926074|ref|XM_011008889.1|	2594	0	PREDICTED: Populus euphratica CSC1-like protein At3g21620 (LOC105112955), transcript variant X2, mRNA	Q9LVE4	1103	0	CSC1-like protein At3g21620	SPAC2G11.09	132	6.00E-31	COG5594	pfam02714	DUF221	Domain of unknown function DUF221. This family consists of hypothetical transmembrane proteins none of which have any function, the aligned region is at 538 residues at maximum length.	GO:0006811|ion transport;	GO:0016021|integral component of membrane;GO:0005886|plasma membrane;	.	.	.
Potri.002G052600.v3.0	125	149	116	73.16122841	13	9	11	13.10214941	3.711731601	1.69E-31	1.39E-30	up	yes	Potri.002G052600	protein_coding	chrChr02:3483467-3485264:+	gi|224062505|ref|XP_002300844.1|	1636	0	patatin-related family protein [Populus trichocarpa]	gi|566156363|ref|XM_002300808.2|	1397	0	Populus trichocarpa patatin-related family protein (POPTR_0002s05350g) mRNA, complete cds	Q93ZQ3	514	8.00E-178	Probable inactive patatin-like protein 9	RP602	58.5	3.00E-08	COG3621	pfam01734	Patatin	Patatin-like phospholipase. This family consists of various patatin glycoproteins from plants. The patatin protein accounts for up to 40% of the total soluble protein in potato tubers. Patatin is a storage protein but it also has the enzymatic activity of lipid acyl hydrolase, catalyzing the cleavage of fatty acids from membrane lipids. Members of this family have been found also in vertebrates.	GO:0016042|lipid catabolic process;	.	GO:0016787|hydrolase activity;	.	.
Potri.014G122400.v3.0	104	119	100	60.49875621	3	13	12	13.03342742	3.704144616	3.01E-26	2.12E-25	up	yes	Potri.014G122400	protein_coding	chrChr14:9479979-9486632:-	gi|743791477|ref|XP_011041441.1|	5688	0	PREDICTED: BRCT domain-containing protein At4g02110-like [Populus euphratica]	gi|566203831|ref|XM_002320944.2|	1658	0	Populus trichocarpa BRCT domain-containing family protein (POPTR_0014s117501g) mRNA, partial cds	O04251	380	6.00E-109	BRCT domain-containing protein At4g02110	.	.	.	.	pfam12738	PTCB-BRCT	twin BRCT domain. This is a BRCT domain that appears in duplicate in most member sequences. BRCT domains are peptide- and phosphopeptide-binding modules. BRCT domains are present in a number of proteins involved in DNA checkpoint controls and DNA repair.	GO:0006270|DNA replication initiation;GO:0033314|mitotic DNA replication checkpoint;GO:0007095|mitotic G2 DNA damage checkpoint;	.	.	K10728	TOPBP1; topoisomerase (DNA) II binding protein 1
Potri.006G221500.v3.0	276	259	178	132.3551801	17	10	34	12.80232858	3.678334337	3.43E-16	1.65E-15	up	yes	Potri.006G221500	protein_coding	chrChr06:23402403-23404057:-	gi|566177819|ref|XP_006381997.1|	1282	3.00E-173	hypothetical protein POPTR_0006s23810g [Populus trichocarpa]	gi|566177818|ref|XM_006381935.1|	1524	0	Populus trichocarpa hypothetical protein (POPTR_0006s23810g) mRNA, complete cds	Q9SEI0	137	7.00E-36	Transcription factor WER	ECU11g1690	87	1.00E-18	COG5147	pfam00249	Myb_DNA-binding	Myb-like DNA-binding domain. This family contains the DNA binding domains from Myb proteins, as well as the SANT domain family.	GO:0045165|cell fate commitment;GO:0045893|positive regulation of transcription, DNA-templated;GO:0048765|root hair cell differentiation;GO:0006351|transcription, DNA-templated;	GO:0005634|nucleus;	GO:0003677|DNA binding;GO:0003700|transcription factor activity, sequence-specific DNA binding;	K09422	MYBP; myb proto-oncogene protein, plant
Potri.009G069100.v3.0	241	293	224	142.3763533	22	22	23	12.58347869	3.653458904	6.95E-58	1.03E-56	up	yes	Potri.009G069100	protein_coding	chrChr09:6835754-6837827:+	gi|224105987|ref|XP_002314004.1|	2724	0	hypothetical protein POPTR_0009s07320g [Populus trichocarpa]	gi|566186766|ref|XM_002313968.2|	1587	0	Populus trichocarpa hypothetical protein (POPTR_0009s07320g) mRNA, complete cds	P48419	820	0	Flavonoid 3',5'-hydroxylase 2	alr1450	126	2.00E-30	COG2124	pfam00067	p450	Cytochrome P450. Cytochrome P450s are haem-thiolate proteins involved in the oxidative degradation of various compounds. They are particularly well known for their role in the degradation of environmental toxins and mutagens. They can be divided into 4 classes, according to the method by which electrons from NAD(P)H are delivered to the catalytic site. Sequence conservation is relatively low with…	GO:0009718|anthocyanin-containing compound biosynthetic process;	GO:0005783|endoplasmic reticulum;	GO:0033772|flavonoid 3',5'-hydroxylase activity;GO:0020037|heme binding;GO:0005506|iron ion binding;	.	.
Potri.001G106100.v3.0	736	840	545	394.6293441	51	60	76	12.55876999	3.650623268	1.77E-137	8.87E-136	up	yes	Potri.001G106100	protein_coding	chrChr01:8438189-8441060:-	gi|567858482|ref|XP_006421924.1|	2243	0	hypothetical protein CICLE_v10004755mg [Citrus clementina]	gi|566148035|ref|XM_002299505.2|	1629	0	Populus trichocarpa hypothetical protein (POPTR_0001s09180g) mRNA, complete cds	P29516	858	0	Tubulin beta-8 chain	ECU03g0820i	701	0	COG5023	pfam03953	Tubulin_C	Tubulin C-terminal domain. This family includes the tubulin alpha, beta and gamma chains. Members of this family are involved in polymer formation. Tubulins are GTPases. FtsZ can polymerize into tubes, sheets, and rings in vitro and is ubiquitous in eubacteria and archaea. Tubulin is the major component of microtubules. (The FtsZ GTPases have been split into their won family).	GO:0007017|microtubule-based process;GO:0009651|response to salt stress;	GO:0005794|Golgi apparatus;GO:0016020|membrane;GO:0005874|microtubule;GO:0045298|tubulin complex;	GO:0005525|GTP binding;GO:0003924|GTPase activity;GO:0005200|structural constituent of cytoskeleton;	K07375	TUBB; tubulin beta
Potri.004G224600.v3.0	232	213	189	118.9463658	9	28	20	12.53172378	3.647512971	1.95E-48	2.39E-47	up	yes	Potri.004G224600	protein_coding	chrChr04:23077274-23078180:+	gi|566168230|ref|XP_006385041.1|	813	2.00E-106	hypothetical protein POPTR_0004s23330g [Populus trichocarpa]	gi|743848973|ref|XM_011030055.1|	573	0	PREDICTED: Populus euphratica uncharacterized LOC105128404 (LOC105128404), mRNA	.	.	.	.	.	.	.	.	pfam15449	Retinal	Retinal protein. This family of proteins is found in the photoreceptor cells of the retina. Mutations of the gene encoding this protein have been associated with retinal disorders such as retinitis pigmentosa and late-onset progressive retinal atrophy. The function of this family of proteins is unknown, but it is likely to be important in the development and function of the retina.	.	.	.	.	.
Potri.003G173900.v3.0	1086	1058	847	560.6412958	69	109	92	12.36676295	3.628396013	2.14E-206	2.12E-204	up	yes	Potri.003G173900	protein_coding	chrChr03:18305437-18310287:+	gi|566163157|ref|XP_006385911.1|	2563	0	hypothetical protein POPTR_0003s17250g [Populus trichocarpa]	gi|566163156|ref|XM_006385849.1|	2459	0	Populus trichocarpa hypothetical protein (POPTR_0003s17250g) mRNA, complete cds	Q05046	879	0	Chaperonin CPN60-2, mitochondrial	SMb21566	582	0	COG0459	pfam00118	Cpn60_TCP1	TCP-1/cpn60 chaperonin family. This family includes members from the HSP60 chaperone family and the TCP-1 (T-complex protein) family.	GO:0042026|protein refolding;	GO:0005739|mitochondrion;	GO:0005524|ATP binding;	.	.
Potri.004G197500.v3.0	201	223	187	115.0429923	11	23	22	12.25959877	3.615839859	1.13E-47	1.36E-46	up	yes	Potri.004G197500	protein_coding	chrChr04:21010551-21015599:+	gi|566167665|ref|XP_006384759.1|	4749	0	leucine-rich repeat transmembrane protein kinase [Populus trichocarpa]	gi|743796849|ref|XM_011008215.1|	3302	0	PREDICTED: Populus euphratica probable inactive receptor kinase At5g10020 (LOC105112495), mRNA	C0LGQ9	682	0	Probable LRR receptor-like serine/threonine-protein kinase At4g20940	SPy1625_1	77.4	4.00E-14	COG0515	pfam00069	Pkinase	Protein kinase domain.	.	GO:0016021|integral component of membrane;GO:0005886|plasma membrane;	GO:0005524|ATP binding;GO:0004674|protein serine/threonine kinase activity;	.	.
Potri.003G087400.v3.0	189	164	140	92.49643161	9	12	24	12.24521957	3.614146738	1.61E-37	1.54E-36	up	yes	Potri.003G087400	protein_coding	chrChr03:11473427-11476814:+	gi|566161609|ref|XP_006385607.1|	4824	0	hypothetical protein POPTR_0003s08570g [Populus trichocarpa]	gi|566161608|ref|XM_006385545.1|	2918	0	Populus trichocarpa hypothetical protein (POPTR_0003s08570g) mRNA, complete cds	.	.	.	.	.	.	.	.	pfam11145	DUF2921	Protein of unknown function (DUF2921). This eukaryotic family of proteins has no known function.	.	.	.	.	.
Potri.001G387700.v3.0	242	252	223	135.2505054	13	24	29	12.21327945	3.610378733	8.77E-55	1.23E-53	up	yes	Potri.001G387700	protein_coding	chrChr01:40395335-40397341:+	gi|566153716|ref|XP_006370113.1|	2478	0	hypothetical protein POPTR_0001s39610g [Populus trichocarpa]	gi|566153715|ref|XM_006370051.1|	1987	0	Populus trichocarpa hypothetical protein (POPTR_0001s39610g) mRNA, complete cds	Q9LXU9	55.1	2.00E-06	IRK-interacting protein	.	.	.	.	pfam04859	DUF641	Plant protein of unknown function (DUF641). Plant protein of unknown function.	GO:0031204|posttranslational protein targeting to membrane, translocation;	GO:0005783|endoplasmic reticulum;GO:0005789|endoplasmic reticulum membrane;GO:0016021|integral component of membrane;	GO:0015450|P-P-bond-hydrolysis-driven protein transmembrane transporter activity;	.	.
Potri.016G033600.v3.0	285	258	196	138.5780328	22	24	23	11.86812254	3.569019823	3.68E-56	5.30E-55	up	yes	Potri.016G033600	protein_coding	chrChr16:1947684-1950614:-	gi|566256386|ref|XP_006388149.1|	4081	0	hypothetical protein POPTR_0311s00200g, partial [Populus trichocarpa]	gi|566256385|ref|XM_006388087.1|	2460	0	Populus trichocarpa hypothetical protein (POPTR_0311s00200g) mRNA, partial cds	Q9FF61	674	0	Putative SWI/SNF-related matrix-associated actin-dependent regulator of chromatin subfamily A member 3-like 1	.	.	.	.	pfam00176	SNF2_N	SNF2 family N-terminal domain. This domain is found in proteins involved in a variety of processes including transcription regulation (e.g., SNF2, STH1, brahma, MOT1), DNA repair (e.g., ERCC6, RAD16, RAD5), DNA recombination (e.g., RAD54), and chromatin unwinding (e.g., ISWI) as well as a variety of other proteins with little functional information (e.g., lodestar, ETL1).	GO:0016569|covalent chromatin modification;GO:0006351|transcription, DNA-templated;	GO:0005634|nucleus;	GO:0005524|ATP binding;GO:0004386|helicase activity;GO:0003676|nucleic acid binding;GO:0008270|zinc ion binding;	K15711	SMARCA3, HLTF; SWI/SNF-related matrix-associated actin-dependent regulator of chromatin subfamily A3 [EC:3.6.4.- 2.3.2.27]
Potri.002G011700.v3.0	323	347	250	172.7535554	23	34	31	11.63476651	3.540370353	4.61E-70	8.66E-69	up	yes	Potri.002G011700	protein_coding	chrChr02:688364-691550:+	gi|566155660|ref|XP_002300656.2|	3204	0	hypothetical protein POPTR_0002s01300g [Populus trichocarpa]	gi|566155659|ref|XM_002300620.2|	2541	0	Populus trichocarpa hypothetical protein (POPTR_0002s01300g) mRNA, complete cds	.	.	.	.	.	.	.	.	pfam04782	DUF632	Protein of unknown function (DUF632). This plant protein may be a leucine zipper, but there is no experimental evidence for this.	.	.	.	.	.
Potri.008G097700.v3.0	106	109	79	55.35520615	12	10	6	11.5752344	3.532969503	9.48E-24	6.13E-23	up	yes	Potri.008G097700	protein_coding	chrChr08:6099779-6108287:-	gi|224101459|ref|XP_002312290.1|	6800	0	hypothetical protein POPTR_0008s09730g [Populus trichocarpa]	gi|743783136|ref|XM_011020587.1|	3845	0	PREDICTED: Populus euphratica uncharacterized LOC105121790 (LOC105121790), transcript variant X1, mRNA	.	.	.	.	.	.	.	.	pfam05965	FYRC	F/Y rich C-terminus. This region is normally found in the trithorax/ALL1 family proteins. It is similar to SMART:SM00542.	.	.	.	.	.
Potri.011G140400.v3.0	1705	1813	1466	941.3706586	127	201	155	11.54284965	3.528927529	2.02E-298	4.08E-296	up	yes	Potri.011G140400	protein_coding	chrChr11:16247963-16249237:-	gi|118486098|gb|ABK94892.1|	602	1.00E-119	unknown [Populus trichocarpa]	gi|118486097|gb|EF146849.1|	1054	0	Populus trichocarpa clone WS01214_P11 unknown mRNA	Q03666	168	1.00E-82	Probable glutathione S-transferase	.	.	.	.	pfam13417	GST_N_3	Glutathione S-transferase, N-terminal domain.	GO:0009734|auxin-activated signaling pathway;	.	GO:0004364|glutathione transferase activity;	.	.
Potri.001G440300.v3.0	746	867	655	427.8901243	56	71	93	11.49938322	3.523484578	2.11E-147	1.17E-145	up	yes	Potri.001G440300	protein_coding	chrChr01:47215988-47222578:+	gi|566154481|ref|XP_006370478.1|	4106	0	hypothetical protein POPTR_0001s43080g [Populus trichocarpa]	gi|566154480|ref|XM_006370416.1|	3365	0	Populus trichocarpa hypothetical protein (POPTR_0001s43080g) mRNA, complete cds	Q9SUN6	1107	0	Subtilisin-like protease SBT2.2	BS_vpr	62	9.00E-09	COG1404	pfam00082	Peptidase_S8	Subtilase family. Subtilases are a family of serine proteases. They appear to have independently and convergently evolved an Asp/Ser/His catalytic triad, like that found in the trypsin serine proteases (see pfam00089). Structure is an alpha/beta fold containing a 7-stranded parallel beta sheet, order 2314567.	.	GO:0005618|cell wall;GO:0005576|extracellular region;	GO:0004252|serine-type endopeptidase activity;	.	.
Potri.013G061800.v3.0	7688	7453	6069	4009.420555	551	820	740	11.23106885	3.489423329	0	0	up	yes	Potri.013G061800	protein_coding	chrChr13:4661922-4666800:-	gi|224125928|ref|XP_002319710.1|	3432	0	hypothetical protein POPTR_0013s05850g [Populus trichocarpa]	gi|566199666|ref|XM_006375845.1|	1978	0	Populus trichocarpa 5-methyltetrahydropteroyltriglutamate--homocysteine methyltransferase family protein (POPTR_0013s05850g) mRNA, complete cds	O50008	1193	0	5-methyltetrahydropteroyltriglutamate--homocysteine methyltransferase 1	XF2272	645	0	COG0620	pfam08267	Meth_synt_1	Cobalamin-independent synthase, N-terminal domain. The N-terminal domain and C-terminal domains of cobalamin-independent synthases together define a catalytic cleft in the enzyme. The N-terminal domain is thought to bind the substrate, in particular, the negatively charged polyglutamate chain. The N-terminal domain is also thought to stabilize a loop from the C-terminal domain.	GO:0050667|homocysteine metabolic process;GO:0046686|response to cadmium ion;GO:0009651|response to salt stress;GO:0010043|response to zinc ion;	GO:0048046|apoplast;GO:0009507|chloroplast;GO:0009570|chloroplast stroma;GO:0005829|cytosol;GO:0016020|membrane;GO:0005777|peroxisome;GO:0005886|plasma membrane;GO:0009506|plasmodesma;GO:0005774|vacuolar membrane;	GO:0003871|5-methyltetrahydropteroyltriglutamate-homocysteine S-methyltransferase activity;GO:0005507|copper ion binding;GO:0008705|methionine synthase activity;GO:0008270|zinc ion binding;	K00549	metE; 5-methyltetrahydropteroyltriglutamate--homocysteine methyltransferase [EC:2.1.1.14]
Potri.019G001400.v3.0	453	451	369	240.6680832	29	52	46	11.219361	3.487918604	4.97E-94	1.36E-92	up	yes	Potri.019G001400	protein_coding	chrChr19:187941-189491:-	gi|566222237|ref|XP_006370899.1|	2348	0	hypothetical protein POPTR_0019s01540g [Populus trichocarpa]	gi|566222236|ref|XM_006370837.1|	1542	0	Populus trichocarpa hypothetical protein (POPTR_0019s01540g) mRNA, complete cds	O64988	236	6.00E-70	Acetyl-CoA-benzylalcohol acetyltransferase	.	.	.	.	pfam02458	Transferase	Transferase family. This family includes a number of transferase enzymes. These include anthranilate N-hydroxycinnamoyl/benzoyltransferase that catalyses the first committed reaction of phytoalexin biosynthesis. Deacetylvindoline 4-O-acetyltransferase EC:2.3.1.107 catalyses the last step in vindoline biosynthesis is also a member of this family. The motif HXXXD is probably part of the active site…	.	.	GO:0016747|transferase activity, transferring acyl groups other than amino-acyl groups;	.	.
Potri.001G206800.v3.0	3315	3628	2786	1839.405734	236	383	361	11.11235584	3.474092797	0	0	up	yes	Potri.001G206800	protein_coding	chrChr01:20699464-20704399:-	gi|566150181|ref|XP_002298197.2|	3883	0	beta-glucosidase family protein [Populus trichocarpa]	gi|566150180|ref|XM_002298161.2|	2909	0	Populus trichocarpa beta-glucosidase family protein (POPTR_0001s21430g) mRNA, complete cds	Q9FLG1	1166	0	Beta-D-xylosidase 4	XF0845	289	3.00E-82	COG1472	pfam00933	Glyco_hydro_3	Glycosyl hydrolase family 3 N terminal domain.	GO:0031222|arabinan catabolic process;GO:0009627|systemic acquired resistance;GO:0045493|xylan catabolic process;	GO:0048046|apoplast;GO:0005618|cell wall;GO:0009505|plant-type cell wall;GO:0005578|proteinaceous extracellular matrix;	GO:0046556|alpha-L-arabinofuranosidase activity;GO:0009044|xylan 1,4-beta-xylosidase activity;	K15920	XYL4; beta-D-xylosidase 4 [EC:3.2.1.37]
Potri.013G047700.v3.0	92	91	87	51.51632397	5	11	12	10.87759589	3.44328783	5.38E-22	3.28E-21	up	yes	Potri.013G047700	protein_coding	chrChr13:3460326-3462373:+	gi|743888571|ref|XP_011038483.1|	1694	0	PREDICTED: uncharacterized protein LOC105135344 isoform X1 [Populus euphratica]	gi|566199422|ref|XM_002319077.2|	1356	0	Populus trichocarpa hypothetical protein (POPTR_0013s04490g) mRNA, complete cds	.	.	.	.	.	.	.	.	pfam00214	Calc_CGRP_IAPP	Calcitonin / CGRP / IAPP family.	.	.	.	.	.
Potri.006G261900.v3.0	54	76	53	34.65177442	4	8	7	10.77928546	3.430189642	2.59E-15	1.20E-14	up	yes	Potri.006G261900	protein_coding	chrChr06:26505124-26508812:+	gi|566178482|ref|XP_002308696.2|	4564	0	hypothetical protein POPTR_0006s27780g [Populus trichocarpa]	gi|566178481|ref|XM_002308660.2|	3132	0	Populus trichocarpa hypothetical protein (POPTR_0006s27780g) mRNA, complete cds	Q8VZG8	695	0	MDIS1-interacting receptor like kinase 2	.	.	.	.	pfam00069	Pkinase	Protein kinase domain.	.	GO:0016021|integral component of membrane;GO:0016020|membrane;GO:0005886|plasma membrane;GO:0009506|plasmodesma;GO:0090406|pollen tube;	GO:0005524|ATP binding;GO:0004674|protein serine/threonine kinase activity;	.	.
Potri.012G118600.v3.0	73	80	57	39.60862982	3	9	10	10.69748814	3.419200174	2.27E-17	1.15E-16	up	yes	Potri.012G118600	protein_coding	chrChr12:13895205-13899411:+	gi|566198053|ref|XP_006376995.1|	4687	0	hypothetical protein POPTR_0012s11910g [Populus trichocarpa]	gi|743914751|ref|XM_011003010.1|	2864	0	PREDICTED: Populus euphratica putative E3 ubiquitin-protein ligase LIN-2 (LOC105108628), transcript variant X3, mRNA	D1FP57	158	7.00E-38	Putative E3 ubiquitin-protein ligase LIN-2	.	.	.	.	pfam11353	DUF3153	Protein of unknown function (DUF3153). This family of proteins with unknown function appear to be restricted to Cyanobacteria. Some members are annotated as membrane proteins however this cannot be confirmed.	GO:0009877|nodulation;	.	GO:0016874|ligase activity;GO:0004842|ubiquitin-protein transferase activity;	.	.
Potri.015G087800.v3.0	1309	1476	1124	742.1040306	113	143	152	10.67412181	3.416045475	1.57E-240	2.05E-238	up	yes	Potri.015G087800	protein_coding	chrChr15:11042950-11049516:-	gi|224136005|ref|XP_002322215.1|	1945	0	pectate lyase 22 precursor family protein [Populus trichocarpa]	gi|224136004|ref|XM_002322179.1|	1644	0	Populus trichocarpa pectate lyase 22 precursor family protein (POPTR_0015s09930g) mRNA, complete cds	Q93Z25	657	0	Probable pectate lyase 22	TM0433	80.1	2.00E-15	COG3866	pfam00544	Pec_lyase_C	Pectate lyase. This enzyme forms a right handed beta helix structure. Pectate lyase is an enzyme involved in the maceration and soft rotting of plant tissue.	GO:0045490|pectin catabolic process;	.	GO:0046872|metal ion binding;GO:0030570|pectate lyase activity;	K01728	pel; pectate lyase [EC:4.2.2.2]
Potri.013G017900.v3.0	187	232	141	105.5022355	19	20	19	10.65269831	3.413147004	3.55E-41	3.70E-40	up	yes	Potri.013G017900	protein_coding	chrChr13:1172957-1176779:+	gi|743830026|ref|XP_011023676.1|	3388	0	PREDICTED: formin-like protein 11 [Populus euphratica]	gi|566198895|ref|XM_002318956.2|	1598	0	Populus trichocarpa formin homology 2 domain-containing family protein (POPTR_0013s01860g) mRNA, complete cds	Q9MA60	650	0	Formin-like protein 11	.	.	.	.	pfam02181	FH2	Formin Homology 2 Domain.	.	GO:0016021|integral component of membrane;	GO:0003779|actin binding;	.	.
Potri.002G207500.v3.0	121	86	104	59.86772911	8	17	9	10.34806275	3.371288802	3.35E-23	2.13E-22	up	yes	Potri.002G207500	protein_coding	chrChr02:17377306-17378162:+	gi|118481873|gb|ABK92873.1|	404	1.00E-45	unknown [Populus trichocarpa]	gi|743933386|ref|XM_011012709.1|	752	0	PREDICTED: Populus euphratica classical arabinogalactan protein 26-like (LOC105115720), mRNA	.	.	.	.	.	.	.	.	pfam14995	TMEM107	Transmembrane protein. This family of proteins is found in eukaryotes. Proteins in this family are typically between 138 and 164 amino acids in length. There are two completely conserved residues (H and E) that may be functionally important and four transmembrane helices. The domains in this family vary in length from 124 to 126 amino acids. The precise function of the protein family is still unk…	.	.	.	.	.
Potri.010G086100.v3.0	123	131	90	65.39181347	16	9	12	10.20193257	3.350770565	2.74E-26	1.94E-25	up	yes	Potri.010G086100	protein_coding	chrChr10:11102870-11104568:+	gi|224108021|ref|XP_002314691.1|	1694	0	hypothetical protein POPTR_0010s09610g [Populus trichocarpa]	gi|566189985|ref|XM_002314655.2|	1409	0	Populus trichocarpa hypothetical protein (POPTR_0010s09610g) mRNA, complete cds	O55242	53.9	6.00E-07	Sigma non-opioid intracellular receptor 1	.	.	.	.	pfam04622	ERG2_Sigma1R	ERG2 and Sigma1 receptor like protein. This family consists of the fungal C-8 sterol isomerase and mammalian sigma1 receptor. C-8 sterol isomerase (delta-8--delta-7 sterol isomerase), catalyses a reaction in ergosterol biosynthesis, which results in unsaturation at C-7 in the B ring of sterols. Sigma 1 receptor is a low molecular mass mammalian protein located in the endoplasmic reticulum, which …	GO:0006869|lipid transport;GO:0007399|nervous system development;GO:0070207|protein homotrimerization;GO:0043523|regulation of neuron apoptotic process;	GO:0030054|cell junction;GO:0016023|cytoplasmic membrane-bounded vesicle;GO:0005783|endoplasmic reticulum;GO:0005789|endoplasmic reticulum membrane;GO:0030426|growth cone;GO:0016021|integral component of membrane;GO:0005811|lipid particle;GO:0005635|nuclear envelope;GO:0005637|nuclear inner membrane;GO:0005640|nuclear outer membrane;GO:0014069|postsynaptic density;GO:0045211|postsynaptic membrane;	GO:0004985|opioid receptor activity;GO:0004872|receptor activity;	.	.
Potri.003G059800.v3.0	64	48	50	31.02597195	4	11	3	10.15612737	3.344278488	3.19E-13	1.33E-12	up	yes	Potri.003G059800	protein_coding	chrChr03:8754444-8756739:-	gi|224070849|ref|XP_002303263.1|	1998	0	hypothetical protein POPTR_0003s05850g [Populus trichocarpa]	gi|566161064|ref|XM_002303227.2|	1280	0	Populus trichocarpa hypothetical protein (POPTR_0003s05850g) mRNA, complete cds	.	.	.	.	.	.	.	.	pfam04862	DUF642	Protein of unknown function (DUF642). This family represents a duplicated conserved region found in a number of uncharacterized plant proteins, potentially in the stem. There is a conserved CGP sequence motif.	.	.	.	.	.
Potri.006G275700.v3.0	610	545	413	297.6333027	45	69	59	10.08229318	3.333751906	3.14E-104	9.88E-103	up	yes	Potri.006G275700	protein_coding	chrChr06:27560483-27563808:+	gi|566178728|ref|XP_006382174.1|	1320	9.00E-180	replication family protein [Populus trichocarpa]	gi|566178727|ref|XM_006382112.1|	1044	0	Populus trichocarpa replication family protein (POPTR_0006s29060g) mRNA, complete cds	Q9ZQ19	240	1.00E-74	Replication protein A 32 kDa subunit A	SPCC1753.01c	80.1	3.00E-16	COG5235	pfam08784	RPA_C	Replication protein A C terminal. This domain corresponds to the C terminal of the single stranded DNA binding protein RPA (replication protein A). RPA is involved in many DNA metabolic pathways including DNA replication, DNA repair, recombination, cell cycle and DNA damage checkpoints.	GO:0006310|DNA recombination;GO:0006281|DNA repair;GO:0006260|DNA replication;GO:0016458|gene silencing;	GO:0005634|nucleus;	GO:0003677|DNA binding;	K10739	RFA2, RPA2; replication factor A2
Potri.014G146100.v3.0	1585	1403	1176	794.5539191	129	154	178	10.05336827	3.329607036	3.50E-226	4.09E-224	up	yes	Potri.014G146100	protein_coding	chrChr14:11145591-11147370:-	gi|224131448|ref|XP_002321087.1|	1531	0	brassinosteroid-regulated family protein [Populus trichocarpa]	gi|566204246|ref|XM_002321051.2|	1254	0	Populus trichocarpa brassinosteroid-regulated family protein (POPTR_0014s14310g) mRNA, complete cds	P35694	462	8.00E-161	Xyloglucan endotransglucosylase/hydrolase 2	YLR213c	73.6	2.00E-13	COG2273	pfam00722	Glyco_hydro_16	Glycosyl hydrolases family 16.	GO:0042546|cell wall biogenesis;GO:0010411|xyloglucan metabolic process;	GO:0048046|apoplast;GO:0005618|cell wall;	GO:0004553|hydrolase activity, hydrolyzing O-glycosyl compounds;GO:0016762|xyloglucan:xyloglucosyl transferase activity;	K08235	E2.4.1.207; xyloglucan:xyloglucosyl transferase [EC:2.4.1.207]
Potri.002G098100.v3.0	303	274	237	155.8956213	26	32	34	9.867453751	3.302677852	6.60E-60	1.02E-58	up	yes	Potri.002G098100	protein_coding	chrChr02:7075164-7080697:+	gi|743805031|ref|XP_011017519.1|	988	2.00E-125	PREDICTED: RNA-binding protein 38, partial [Populus euphratica]	gi|566157176|ref|XM_002301022.2|	1172	0	Populus trichocarpa hypothetical protein (POPTR_0002s09830g) mRNA, complete cds	Q9M1S3	120	1.00E-28	Probable RNA-binding protein ARP1	.	.	.	.	pfam00076	RRM_1	RNA recognition motif. (a.k.a. RRM, RBD, or RNP domain). The RRM motif is probably diagnostic of an RNA binding protein. RRMs are found in a variety of RNA binding proteins, including various hnRNP proteins, proteins implicated in regulation of alternative splicing, and protein components of snRNPs. The motif also appears in a few single stranded DNA binding proteins. The RRM structure consists o…	GO:0010029|regulation of seed germination;GO:0009737|response to abscisic acid;GO:0009651|response to salt stress;GO:0009414|response to water deprivation;	GO:0005634|nucleus;	GO:0000166|nucleotide binding;GO:0003723|RNA binding;	.	.
Potri.001G303000.v3.0	470	576	384	271.7559301	35	69	58	9.856847761	3.301126344	8.05E-92	2.13E-90	up	yes	Potri.001G303000	protein_coding	chrChr01:30651928-30653762:-	gi|566151949|ref|XP_006369755.1|	2598	0	hypothetical protein POPTR_0001s31040g [Populus trichocarpa]	gi|566151948|ref|XM_006369693.1|	1835	0	Populus trichocarpa hypothetical protein (POPTR_0001s31040g) mRNA, complete cds	Q9AT54	616	0	Scopoletin glucosyltransferase	.	.	.	.	pfam00201	UDPGT	UDP-glucoronosyl and UDP-glucosyl transferase.	GO:0008152|metabolic process;	.	GO:0042802|identical protein binding;GO:0050275|scopoletin glucosyltransferase activity;	.	.
Potri.010G007800.v3.0	45	41	43	25.0757675	6	4	5	9.582707797	3.260433378	3.95E-11	1.47E-10	up	yes	Potri.010G007800	protein_coding	chrChr10:884114-884951:+	gi|566188574|ref|XP_006378047.1|	1066	1.00E-144	hypothetical protein POPTR_0010s01160g [Populus trichocarpa]	gi|566188573|ref|XM_006377985.1|	838	0	Populus trichocarpa hypothetical protein (POPTR_0010s01160g) mRNA, complete cds	P16335	251	1.00E-81	Wound-responsive protein GWIN3	.	.	.	.	pfam00197	Kunitz_legume	Trypsin and protease inhibitor.	.	.	GO:0004866|endopeptidase inhibitor activity;	.	.
Potri.005G028500.v3.0	215	215	225	127.7462249	23	29	28	9.213056414	3.203679847	1.99E-45	2.28E-44	up	yes	Potri.005G028500	protein_coding	chrChr05:2096094-2097799:+	gi|743882694|ref|XP_011036822.1|	1247	1.00E-168	PREDICTED: acetyl-CoA-benzylalcohol acetyltransferase-like [Populus euphratica]	gi|743882693|ref|XM_011038520.1|	1060	0	PREDICTED: Populus euphratica acetyl-CoA-benzylalcohol acetyltransferase-like (LOC105134196), mRNA	O64988	234	8.00E-70	Acetyl-CoA-benzylalcohol acetyltransferase	.	.	.	.	pfam02458	Transferase	Transferase family. This family includes a number of transferase enzymes. These include anthranilate N-hydroxycinnamoyl/benzoyltransferase that catalyses the first committed reaction of phytoalexin biosynthesis. Deacetylvindoline 4-O-acetyltransferase EC:2.3.1.107 catalyses the last step in vindoline biosynthesis is also a member of this family. The motif HXXXD is probably part of the active site…	.	.	GO:0016747|transferase activity, transferring acyl groups other than amino-acyl groups;	.	.
Potri.018G015500.v3.0	277	297	239	156.5968435	24	41	34	9.191524823	3.200304216	3.99E-59	6.06E-58	up	yes	Potri.018G015500	protein_coding	chrChr18:1242621-1245126:+	gi|224143363|ref|XP_002324930.1|	1596	0	hypothetical protein POPTR_0018s02910g [Populus trichocarpa]	gi|566213928|ref|XM_002324894.2|	1372	0	Populus trichocarpa hypothetical protein (POPTR_0018s02910g) mRNA, complete cds	Q9SK52	416	2.00E-140	Peroxidase 18	.	.	.	.	pfam00141	peroxidase	Peroxidase.	GO:0042744|hydrogen peroxide catabolic process;GO:0009664|plant-type cell wall organization;GO:0006979|response to oxidative stress;	GO:0005576|extracellular region;GO:0009505|plant-type cell wall;	GO:0020037|heme binding;GO:0046872|metal ion binding;GO:0004601|peroxidase activity;	K00430	E1.11.1.7; peroxidase [EC:1.11.1.7]
Potri.010G038600.v3.0	231	228	197	126.6905314	23	37	20	9.173231888	3.19743011	6.16E-47	7.32E-46	up	yes	Potri.010G038600	protein_coding	chrChr10:6558223-6560664:-	gi|566189096|ref|XP_006378206.1|	3147	0	hypothetical protein POPTR_0010s04810g [Populus trichocarpa]	gi|566189095|ref|XM_006378144.1|	1898	0	Populus trichocarpa hypothetical protein (POPTR_0010s04810g) mRNA, complete cds	.	.	.	.	.	.	.	.	pfam06075	DUF936	Plant protein of unknown function (DUF936). This family consists of several hypothetical proteins from Arabidopsis thaliana and Oryza sativa. The function of this family is unknown.	.	.	.	.	.
Potri.001G092200.v3.0	981	1151	959	598.7240229	91	167	129	8.993810586	3.1689325	1.59E-158	9.68E-157	up	yes	Potri.001G092200	protein_coding	chrChr01:7243597-7248494:-	gi|347466587|gb|AEO97206.1|	2921	0	endo-1,4-beta-glucanase [Populus trichocarpa]	gi|566148251|ref|XM_002299442.2|	1771	0	Populus trichocarpa endo-glucanase 2 family protein (POPTR_0001s10560g) mRNA, complete cds	Q42059	936	0	Endoglucanase 6	.	.	.	.	pfam00759	Glyco_hydro_9	Glycosyl hydrolase family 9.	GO:0071555|cell wall organization;GO:0030245|cellulose catabolic process;	GO:0005576|extracellular region;	GO:0030246|carbohydrate binding;GO:0008810|cellulase activity;	.	.
Potri.009G016600.v3.0	81	84	66	44.57231733	7	10	12	8.892494552	3.152588185	1.91E-18	1.02E-17	up	yes	Potri.009G016600	protein_coding	chrChr09:2791448-2793886:+	gi|566185888|ref|XP_002314255.2|	2107	0	hypothetical protein POPTR_0009s02170g [Populus trichocarpa]	gi|566185887|ref|XM_002314219.2|	2413	0	Populus trichocarpa hypothetical protein (POPTR_0009s02170g) mRNA, complete cds	Q0V865	195	7.00E-53	Protein FAF-like, chloroplastic	.	.	.	.	pfam11250	DUF3049	Protein of unknown function (DUF3049). This eukaryotic family of proteins has no known function.	.	GO:0009507|chloroplast;	.	.	.
Potri.011G158300.v3.0	2120	2280	1778	1193.885668	231	293	251	8.870273815	3.148978639	0	0	up	yes	Potri.011G158300	protein_coding	chrChr11:17547741-17549522:+	gi|566195776|ref|XP_006377911.1|	2648	0	hypothetical protein POPTR_0011s16160g [Populus trichocarpa]	gi|566195775|ref|XM_006377849.1|	1720	0	Populus trichocarpa hypothetical protein (POPTR_0011s16160g) mRNA, complete cds	Q9SA85	617	0	Berberine bridge enzyme-like 8	mlr6875	106	1.00E-23	COG0277	pfam01565	FAD_binding_4	FAD binding domain. This family consists of various enzymes that use FAD as a co-factor, most of the enzymes are similar to oxygen oxidoreductase. One of the enzymes Vanillyl-alcohol oxidase (VAO) has a solved structure, the alignment includes the FAD binding site, called the PP-loop, between residues 99-110. The FAD molecule is covalently bound in the known structure, however the residue that li…	.	.	GO:0050660|flavin adenine dinucleotide binding;GO:0016614|oxidoreductase activity, acting on CH-OH group of donors;	.	.
Potri.003G125400.v3.0	734	781	539	394.4794267	64	98	97	8.821521832	3.141027562	1.19E-128	5.34E-127	up	yes	Potri.003G125400	protein_coding	chrChr03:14642224-14645355:-	gi|567858482|ref|XP_006421924.1|	2253	0	hypothetical protein CICLE_v10004755mg [Citrus clementina]	gi|566162328|ref|XM_002304452.2|	1687	0	Populus trichocarpa hypothetical protein (POPTR_0003s12540g) mRNA, complete cds	P37392	859	0	Tubulin beta-1 chain	ECU03g0820i	702	0	COG5023	pfam03953	Tubulin_C	Tubulin C-terminal domain. This family includes the tubulin alpha, beta and gamma chains. Members of this family are involved in polymer formation. Tubulins are GTPases. FtsZ can polymerize into tubes, sheets, and rings in vitro and is ubiquitous in eubacteria and archaea. Tubulin is the major component of microtubules. (The FtsZ GTPases have been split into their won family).	GO:0007017|microtubule-based process;	GO:0005737|cytoplasm;GO:0005874|microtubule;	GO:0005525|GTP binding;GO:0003924|GTPase activity;GO:0005200|structural constituent of cytoskeleton;	.	.
Potri.002G020500.v3.0	245	246	218	137.8628535	29	35	26	8.791198889	3.136059925	1.37E-50	1.76E-49	up	yes	Potri.002G020500	protein_coding	chrChr02:1217315-1220147:-	gi|566155811|ref|XP_002301968.2|	1624	0	hypothetical protein POPTR_0002s02200g [Populus trichocarpa]	gi|566155810|ref|XM_002301932.2|	1644	0	Populus trichocarpa hypothetical protein (POPTR_0002s02200g) mRNA, complete cds	P83332	269	8.00E-84	Thaumatin-like protein 1	.	.	.	.	pfam00314	Thaumatin	Thaumatin family.	GO:0006952|defense response;	GO:0005576|extracellular region;	.	.	.
Potri.002G223300.v3.0	29	36	24	17.26768491	7	2	2	8.752144542	3.129636564	1.27E-07	3.81E-07	up	yes	Potri.002G223300	protein_coding	chrChr02:21076590-21078318:+	gi|224064866|ref|XP_002301590.1|	970	1.00E-127	fasciclin-like AGP 12 family protein [Populus trichocarpa]	gi|566159343|ref|XM_002301554.2|	1000	0	Populus trichocarpa fasciclin-like AGP 12 family protein (POPTR_0002s22020g) mRNA, complete cds	Q9SJ81	227	4.00E-70	Fasciclin-like arabinogalactan protein 7	.	.	.	.	pfam02469	Fasciclin	Fasciclin domain. This extracellular domain is found repeated four times in grasshopper fasciclin I as well as in proteins from mammals, sea urchins, plants, yeast and bacteria.	.	GO:0031225|anchored component of membrane;GO:0046658|anchored component of plasma membrane;GO:0016020|membrane;GO:0005886|plasma membrane;	.	.	.
Potri.012G038000.v3.0	144	124	88	68.33487613	14	17	14	8.745193866	3.128490367	3.99E-26	2.81E-25	up	yes	Potri.012G038000	protein_coding	chrChr12:3362323-3363573:-	gi|566196615|ref|XP_002317725.2|	1127	1.00E-150	hypothetical protein POPTR_0012s03500g [Populus trichocarpa]	gi|566196614|ref|XM_002317689.2|	597	0	Populus trichocarpa hypothetical protein (POPTR_0012s03500g) mRNA, complete cds	Q9SX73	54.7	5.00E-07	Kinase-interacting family protein	.	.	.	.	pfam07765	KIP1	KIP1-like protein. This is a family of sequences found exclusively in plants. They are similar to kinase interacting protein 1 (KIP1), which has been found to interact with the kinase domain of PRK1, a receptor-like kinase. This particular region contains two coiled-coils, which are described as motifs involved in protein-protein interactions. It has also been suggested that the protein's coiled-…	.	GO:0005737|cytoplasm;	.	.	.
Potri.017G050300.v3.0	528	522	365	271.7799046	45	74	61	8.74308984	3.128143224	7.01E-92	1.86E-90	up	yes	Potri.017G050300	protein_coding	chrChr17:4192267-4195547:-	gi|566172621|ref|XP_002306721.2|	167	2.00E-10	hypothetical protein POPTR_0005s21920g [Populus trichocarpa]	gi|566212056|ref|XM_002323931.2|	619	0	Populus trichocarpa hypothetical protein (POPTR_0017s07700g) mRNA, complete cds	.	.	.	.	.	.	.	.	pfam08808	RES	RES domain. This presumed domain contains 3 highly conserved polar groups that could form an active site. These are an arginine, glutamate and serine, hence the RES domain. The domain is found widely distributed in bacteria. The domain is about 150 residues in length.	.	.	.	.	.
Potri.010G129400.v3.0	283	313	230	159.5809024	33	39	33	8.733924185	3.126630008	1.22E-58	1.84E-57	up	yes	Potri.010G129400	protein_coding	chrChr10:14463092-14464803:+	gi|224108539|ref|XP_002314884.1|	1831	0	hypothetical protein POPTR_0010s13960g [Populus trichocarpa]	gi|743797625|ref|XM_011010243.1|	1288	0	PREDICTED: Populus euphratica probable galacturonosyltransferase-like 3 (LOC105113888), mRNA	Q0V7R1	521	0	Probable galacturonosyltransferase-like 3	BS_gspA	61.2	2.00E-09	COG1442	pfam01501	Glyco_transf_8	Glycosyl transferase family 8. This family includes enzymes that transfer sugar residues to donor molecules. Members of this family are involved in lipopolysaccharide biosynthesis and glycogen synthesis. This family includes Lipopolysaccharide galactosyltransferase, lipopolysaccharide glucosyltransferase 1, and glycogenin glucosyltransferase.	GO:0071555|cell wall organization;GO:0045489|pectin biosynthetic process;GO:0000271|polysaccharide biosynthetic process;	GO:0005794|Golgi apparatus;GO:0000139|Golgi membrane;GO:0016021|integral component of membrane;	GO:0047262|polygalacturonate 4-alpha-galacturonosyltransferase activity;GO:0016757|transferase activity, transferring glycosyl groups;	.	.
Potri.004G001000.v3.0	313	333	223	167.128636	35	35	40	8.724901743	3.125138884	2.61E-59	3.98E-58	up	yes	Potri.004G001000	protein_coding	chrChr04:106683-108477:-	gi|566164124|ref|XP_006383823.1|	1892	0	leucine-rich repeat family protein [Populus trichocarpa]	gi|743943759|ref|XM_011018091.1|	1468	0	PREDICTED: Populus euphratica probable LRR receptor-like serine/threonine-protein kinase At4g08850 (LOC105119900), mRNA	Q6XAT2	98.6	4.00E-20	LRR receptor-like serine/threonine-protein kinase ERL2	.	.	.	.	pfam13855	LRR_8	Leucine rich repeat.	GO:0009553|embryo sac development;GO:0048481|ovule development;GO:0010103|stomatal complex morphogenesis;	GO:0016021|integral component of membrane;	GO:0005524|ATP binding;GO:0004674|protein serine/threonine kinase activity;	.	.
Potri.015G057800.v3.0	2005	2102	1445	1067.613549	168	324	225	8.685565383	3.118619764	4.14E-83	9.59E-82	up	yes	Potri.015G057800	protein_coding	chrChr15:7914635-7918947:-	gi|566206289|ref|XP_006374403.1|	689	2.00E-85	hypothetical protein POPTR_0015s06880g [Populus trichocarpa]	gi|566206288|ref|XM_006374341.1|	1015	0	Populus trichocarpa hypothetical protein (POPTR_0015s06880g) mRNA, complete cds	Q9FZ86	151	1.00E-41	PLASMODESMATA CALLOSE-BINDING PROTEIN 3	.	.	.	.	pfam07983	X8	X8 domain. The X8 domain domain contains at least 6 conserved cysteine residues that presumably form three disulphide bridges. The domain is found in an Olive pollen allergen as well as at the C-terminus of several families of glycosyl hydrolases. This domain may be involved in carbohydrate binding. This domain is characteristic of GPI-anchored domains.	GO:0052543|callose deposition in cell wall;GO:0009408|response to heat;	GO:0031225|anchored component of membrane;GO:0046658|anchored component of plasma membrane;GO:0009505|plant-type cell wall;GO:0009506|plasmodesma;	GO:0001872|(1->3)-beta-D-glucan binding;GO:0004553|hydrolase activity, hydrolyzing O-glycosyl compounds;GO:0030247|polysaccharide binding;	.	.
Potri.004G018000.v3.0	242	268	196	136.1231227	18	36	37	8.682383887	3.118091212	1.19E-49	1.51E-48	up	yes	Potri.004G018000	protein_coding	chrChr04:1187812-1189421:-	gi|743885864|ref|XP_011037679.1|	1932	0	PREDICTED: pentatricopeptide repeat-containing protein At1g61870, mitochondrial [Populus euphratica]	gi|743885863|ref|XM_011039377.1|	1357	0	PREDICTED: Populus euphratica pentatricopeptide repeat-containing protein At1g61870, mitochondrial (LOC105134824), mRNA	Q8LE47	421	2.00E-141	Pentatricopeptide repeat-containing protein At1g61870, mitochondrial	.	.	.	.	pfam13041	PPR_2	PPR repeat family. This repeat has no known function. It is about 35 amino acids long and is found in up to 18 copies in some proteins. The family appears to be greatly expanded in plants and fungi. The repeat has been called PPR.	.	GO:0016020|membrane;GO:0005743|mitochondrial inner membrane;GO:0005739|mitochondrion;	GO:0000166|nucleotide binding;GO:0003723|RNA binding;	.	.
Potri.003G175900.v3.0	1322	1430	1054	735.5351949	133	200	160	8.600887922	3.104485606	2.14E-218	2.42E-216	up	yes	Potri.003G175900	protein_coding	chrChr03:18423236-18428254:-	gi|224075595|ref|XP_002304700.1|	2351	0	pectate lyase family protein [Populus trichocarpa]	gi|566163192|ref|XM_002304664.2|	2150	0	Populus trichocarpa pectate lyase family protein (POPTR_0003s17450g) mRNA, complete cds	Q944R1	681	0	Probable pectate lyase 15	TM0433	82.4	6.00E-16	COG3866	pfam00544	Pec_lyase_C	Pectate lyase. This enzyme forms a right handed beta helix structure. Pectate lyase is an enzyme involved in the maceration and soft rotting of plant tissue.	GO:0045490|pectin catabolic process;	.	GO:0046872|metal ion binding;GO:0030570|pectate lyase activity;	K01728	pel; pectate lyase [EC:4.2.2.2]
Potri.007G128600.v3.0	147	135	97	73.08427765	16	17	16	8.548996431	3.095755072	6.24E-28	4.67E-27	up	yes	Potri.007G128600	protein_coding	chrChr07:14456363-14458527:+	gi|566179142|ref|XP_002310432.2|	844	1.00E-107	hypothetical protein POPTR_0007s01960g [Populus trichocarpa]	gi|566179141|ref|XM_002310396.2|	1190	0	Populus trichocarpa hypothetical protein (POPTR_0007s01960g) mRNA, complete cds	O22845	222	2.00E-67	Calmodulin-like protein 5	SPAC3A12.14	87.8	2.00E-19	COG5126	pfam13499	EF-hand_7	EF-hand domain pair.	.	GO:0012505|endomembrane system;GO:0031303|integral component of endosome membrane;	GO:0005509|calcium ion binding;	K13448	CML; calcium-binding protein CML
Potri.011G045700.v3.0	256	249	209	138.767205	28	30	35	8.547852857	3.095562074	3.71E-51	4.84E-50	up	yes	Potri.011G045700	protein_coding	chrChr11:3885378-3887399:+	gi|566193691|ref|XP_002317233.2|	1640	0	hypothetical protein POPTR_0011s04550g [Populus trichocarpa]	gi|566193690|ref|XM_002317197.2|	1481	0	Populus trichocarpa hypothetical protein (POPTR_0011s04550g) mRNA, complete cds	.	.	.	.	.	.	.	.	pfam07948	Nairovirus_M	Nairovirus M polyprotein-like. The sequences in this family are similar to the Dugbe virus M polyprotein precursor, which includes glycoproteins G1 and G2. Both are thought to be inserted in the membrane of the Golgi complex of the infected host cell, and G1 is known to have a role in infection of vertebrate hosts.	.	.	.	.	.
Potri.014G125100.v3.0	1226	1326	1004	688.5087382	115	179	172	8.522217166	3.091228815	3.01E-209	3.12E-207	up	yes	Potri.014G125100	protein_coding	chrChr14:9639554-9643849:-	gi|743791607|ref|XP_011041770.1|	5614	0	PREDICTED: cellulose synthase-like protein D5 [Populus euphratica]	gi|566203873|ref|XM_002320953.2|	3534	0	Populus trichocarpa cellulose synthase family protein (POPTR_0014s12000g) mRNA, complete cds	Q9SRW9	1820	0	Cellulose synthase-like protein D5	alr3757	66.6	4.00E-10	COG1215	pfam03552	Cellulose_synt	Cellulose synthase. Cellulose, an aggregate of unbranched polymers of beta-1,4-linked glucose residues, is the major component of wood and thus paper, and is synthesized by plants, most algae, some bacteria and fungi, and even some animals. The genes that synthesize cellulose in higher plants differ greatly from the well-characterized genes found in Acetobacter and Agrobacterium sp. More correctl…	GO:0042546|cell wall biogenesis;GO:0071555|cell wall organization;GO:0030244|cellulose biosynthetic process;GO:0071669|plant-type cell wall organization or biogenesis;GO:0006970|response to osmotic stress;GO:0009651|response to salt stress;GO:0009414|response to water deprivation;GO:0048367|shoot system development;	GO:0005794|Golgi apparatus;GO:0000139|Golgi membrane;GO:0016021|integral component of membrane;	GO:0016760|cellulose synthase (UDP-forming) activity;GO:0046527|glucosyltransferase activity;GO:0051753|mannan synthase activity;	K00770	E2.4.2.24; 1,4-beta-D-xylan synthase [EC:2.4.2.24]
Potri.003G138000.v3.0	370	423	282	207.4371372	41	43	56	8.497745358	3.087080113	6.80E-70	1.27E-68	up	yes	Potri.003G138000	protein_coding	chrChr03:15630139-15632708:+	gi|743825467|ref|XP_011022536.1|	1568	0	PREDICTED: high mobility group B protein 13-like [Populus euphratica]	gi|743825466|ref|XM_011024234.1|	1648	0	PREDICTED: Populus euphratica high mobility group B protein 13-like (LOC105124282), mRNA	Q9T012	303	2.00E-94	High mobility group B protein 13	YBR089c-a	50.4	1.00E-06	COG5648	pfam00505	HMG_box	HMG (high mobility group) box.	.	GO:0005634|nucleus;	GO:0003677|DNA binding;GO:0003700|transcription factor activity, sequence-specific DNA binding;	K09273	UBTF; upstream-binding transcription factor
Potri.004G148400.v3.0	38	36	30	20.11546939	1	7	6	8.413677235	3.072736475	7.74E-09	2.51E-08	up	yes	Potri.004G148400	protein_coding	chrChr04:17105202-17107147:-	gi|743923142|ref|XP_011005654.1|	2351	0	PREDICTED: WD repeat-containing protein tag-125-like [Populus euphratica]	gi|146149427|gb|AC184070.2|	1946	0	Populus trichocarpa clone Pop1-31N15, complete sequence	Q61FW2	100	9.00E-21	F-box/WD repeat-containing protein sel-10	.	.	.	.	pfam00400	WD40	WD domain, G-beta repeat.	GO:0007186|G-protein coupled receptor signaling pathway;	GO:0005634|nucleus;	GO:0005525|GTP binding;GO:0003924|GTPase activity;GO:0046872|metal ion binding;GO:0004871|signal transducer activity;	K10260	FBXW7, SEL10; F-box and WD-40 domain protein 7
Potri.006G179700.v3.0	818	866	731	470.981633	92	126	104	8.382362079	3.06735684	9.42E-149	5.23E-147	up	yes	Potri.006G179700	protein_coding	chrChr06:19398534-19400211:+	gi|224091845|ref|XP_002309370.1|	2430	0	hypothetical protein POPTR_0006s19340g [Populus trichocarpa]	gi|566177078|ref|XM_002309334.2|	1591	0	Populus trichocarpa hypothetical protein (POPTR_0006s19340g) mRNA, complete cds	Q43716	652	0	Anthocyanidin 3-O-glucosyltransferase	.	.	.	.	pfam00201	UDPGT	UDP-glucoronosyl and UDP-glucosyl transferase.	GO:0009718|anthocyanin-containing compound biosynthetic process;	.	GO:0047213|anthocyanidin 3-O-glucosyltransferase activity;	.	.
Potri.015G128400.v3.0	572	564	468	312.3982059	61	77	77	8.318931314	3.056398205	3.86E-107	1.27E-105	up	yes	Potri.015G128400	protein_coding	chrChr15:14028406-14029409:+	gi|566207612|ref|XP_002321835.2|	999	1.00E-133	hypothetical protein POPTR_0015s14670g [Populus trichocarpa]	gi|566207611|ref|XM_002321799.2|	774	0	Populus trichocarpa hypothetical protein (POPTR_0015s14670g) mRNA, complete cds	P17407	142	7.00E-39	21 kDa protein	.	.	.	.	pfam04043	PMEI	Plant invertase/pectin methylesterase inhibitor. This domain inhibits pectin methylesterases (PMEs) and invertases through formation of a non-covalent 1:1 complex. It has been implicated in the regulation of fruit development, carbohydrate metabolizm and cell wall extension. It may also be involved in inhibiting microbial pathogen PMEs. It has been observed that it is often expressed as a large i…	.	.	GO:0004857|enzyme inhibitor activity;	.	.
Potri.004G044700.v3.0	1910	1891	1389	1005.716173	175	279	250	8.217490837	3.038697943	3.31E-258	5.11E-256	up	yes	Potri.004G044700	protein_coding	chrChr04:3395338-3397065:+	gi|566164897|ref|XP_002305791.2|	857	2.00E-111	hypothetical protein POPTR_0004s04450g [Populus trichocarpa]	gi|566164896|ref|XM_002305755.2|	1052	0	Populus trichocarpa hypothetical protein (POPTR_0004s04450g) mRNA, complete cds	Q9FZA2	139	6.00E-36	Non-classical arabinogalactan protein 31	.	.	.	.	pfam01190	Pollen_Ole_e_I	Pollen proteins Ole e I like.	GO:0009753|response to jasmonic acid;	GO:0005576|extracellular region;GO:0009505|plant-type cell wall;GO:0005886|plasma membrane;GO:0009506|plasmodesma;	.	.	.
Potri.T023400.v3.0	82	139	83	59.02245494	11	15	16	8.04311079	3.007753593	1.22E-20	7.04E-20	up	yes	Potri.T023400	protein_coding	chrscaffold_29:388482-397516:-	gi|743860738|ref|XP_011030938.1|	3788	0	PREDICTED: G-type lectin S-receptor-like serine/threonine-protein kinase At4g27290 [Populus euphratica]	gi|743860737|ref|XM_011032636.1|	2484	0	PREDICTED: Populus euphratica G-type lectin S-receptor-like serine/threonine-protein kinase At4g27290 (LOC105130230), mRNA	O81832	757	0	G-type lectin S-receptor-like serine/threonine-protein kinase At4g27290	.	.	.	.	pfam00069	Pkinase	Protein kinase domain.	GO:0006952|defense response;GO:0006468|protein phosphorylation;GO:0048544|recognition of pollen;	GO:0005886|plasma membrane;GO:0009506|plasmodesma;	GO:0005524|ATP binding;GO:0005516|calmodulin binding;GO:0030246|carbohydrate binding;GO:0004674|protein serine/threonine kinase activity;	.	.
Potri.016G054900.v3.0	515	472	426	277.0316312	46	74	80	7.928821185	2.98710639	5.36E-88	1.34E-86	up	yes	Potri.016G054900	protein_coding	chrChr16:3587792-3594377:+	gi|566208859|ref|XP_006373780.1|	5481	0	hypothetical protein POPTR_0016s05520g [Populus trichocarpa]	gi|566208860|ref|XM_002322676.2|	3100	0	Populus trichocarpa cellulose synthase family protein (POPTR_0016s05520g) mRNA, complete cds	Q941L0	1742	0	Cellulose synthase A catalytic subunit 3 [UDP-forming]	alr3757	93.6	2.00E-18	COG1215	pfam03552	Cellulose_synt	Cellulose synthase. Cellulose, an aggregate of unbranched polymers of beta-1,4-linked glucose residues, is the major component of wood and thus paper, and is synthesized by plants, most algae, some bacteria and fungi, and even some animals. The genes that synthesize cellulose in higher plants differ greatly from the well-characterized genes found in Acetobacter and Agrobacterium sp. More correctl…	GO:0071555|cell wall organization;GO:0030244|cellulose biosynthetic process;GO:0006952|defense response;GO:0009833|plant-type primary cell wall biogenesis;GO:0009834|plant-type secondary cell wall biogenesis;	GO:0005768|endosome;GO:0005794|Golgi apparatus;GO:0016021|integral component of membrane;GO:0005886|plasma membrane;GO:0009506|plasmodesma;GO:0005802|trans-Golgi network;	GO:0016760|cellulose synthase (UDP-forming) activity;GO:0008270|zinc ion binding;	K10999	CESA; cellulose synthase A [EC:2.4.1.12]
Potri.003G057100.v3.0	160	200	125	94.36135246	24	24	20	7.858942082	2.97433512	9.18E-33	7.82E-32	up	yes	Potri.003G057100	protein_coding	chrChr03:8498965-8500680:+	gi|566161010|ref|XP_002304178.2|	2179	0	anthranilate N-hydroxycinnamoyl/benzoyltransferase family protein [Populus trichocarpa]	gi|158303379|gb|AC212796.1|	1716	0	Populus trichocarpa clone ACSB2685-C04, complete sequence	Q9SND9	304	4.00E-95	Uncharacterized acetyltransferase At3g50280	.	.	.	.	pfam02458	Transferase	Transferase family. This family includes a number of transferase enzymes. These include anthranilate N-hydroxycinnamoyl/benzoyltransferase that catalyses the first committed reaction of phytoalexin biosynthesis. Deacetylvindoline 4-O-acetyltransferase EC:2.3.1.107 catalyses the last step in vindoline biosynthesis is also a member of this family. The motif HXXXD is probably part of the active site…	.	.	GO:0016747|transferase activity, transferring acyl groups other than amino-acyl groups;	.	.
Potri.011G093500.v3.0	292	337	272	176.5982493	27	53	49	7.85054023	2.972791936	8.87E-59	1.34E-57	up	yes	Potri.011G093500	protein_coding	chrChr11:11364228-11367418:+	gi|566194610|ref|XP_002316776.2|	1633	0	hypothetical protein POPTR_0011s09590g [Populus trichocarpa]	gi|566194609|ref|XM_002316740.2|	1628	0	Populus trichocarpa hypothetical protein (POPTR_0011s09590g) mRNA, complete cds	Q9FM65	432	4.00E-145	Fasciclin-like arabinogalactan protein 1	.	.	.	.	pfam02469	Fasciclin	Fasciclin domain. This extracellular domain is found repeated four times in grasshopper fasciclin I as well as in proteins from mammals, sea urchins, plants, yeast and bacteria.	GO:0048364|root development;GO:0048367|shoot system development;	GO:0031225|anchored component of membrane;GO:0046658|anchored component of plasma membrane;GO:0005618|cell wall;GO:0005886|plasma membrane;	.	.	.
Potri.003G057400.v3.0	53	70	41	31.86836605	9	10	4	7.839016252	2.970672616	2.38E-12	9.47E-12	up	yes	Potri.003G057400	protein_coding	chrChr03:8545062-8547089:-	gi|743893499|ref|XP_011039983.1|	2184	0	PREDICTED: gibberellin 3-beta-dioxygenase 1-like [Populus euphratica]	gi|38154345|gb|AY433958.1|	1439	0	Populus tremula x Populus tremuloides gibberellin 3-oxidase (GA3ox1) mRNA, complete cds	O24648	525	0	Gibberellin 3-beta-dioxygenase 1	PA0147	114	5.00E-27	COG3491	pfam03171	2OG-FeII_Oxy	2OG-Fe(II) oxygenase superfamily. This family contains members of the 2-oxoglutarate (2OG) and Fe(II)-dependent oxygenase superfamily. This family includes the C-terminal of prolyl 4-hydroxylase alpha subunit. The holoenzyme has the activity EC:1.14.11.2 catalyzing the reaction: Procollagen L-proline + 2-oxoglutarate + O2 <=> procollagen trans- 4-hydroxy-L-proline + succinate + CO2. The full enzy…	GO:0009686|gibberellin biosynthetic process;	.	GO:0016707|gibberellin 3-beta-dioxygenase activity;GO:0046872|metal ion binding;	.	.
Potri.018G031100.v3.0	5155	5529	4547	2991.636577	575	857	766	7.765303106	2.957042239	0	0	up	yes	Potri.018G031100	protein_coding	chrChr18:2423653-2426820:-	gi|566213642|ref|XP_002324280.2|	2054	0	hypothetical protein POPTR_0018s01390g [Populus trichocarpa]	gi|566213641|ref|XM_002324244.2|	1298	0	Populus trichocarpa hypothetical protein (POPTR_0018s01390g) mRNA, complete cds	.	.	.	.	.	.	.	.	pfam04862	DUF642	Protein of unknown function (DUF642). This family represents a duplicated conserved region found in a number of uncharacterized plant proteins, potentially in the stem. There is a conserved CGP sequence motif.	.	.	.	.	.
Potri.005G040100.v3.0	901	893	722	493.0830816	94	124	144	7.755013074	2.955129213	5.89E-149	3.28E-147	up	yes	Potri.005G040100	protein_coding	chrChr05:2941559-2944227:-	gi|566165380|ref|XP_006384115.1|	523	4.00E-62	hypothetical protein POPTR_0004s07180g [Populus trichocarpa]	gi|743910758|ref|XM_011050597.1|	807	0	PREDICTED: Populus euphratica 40S ribosomal protein S10-1-like (LOC105142800), transcript variant X2, mRNA	Q9LTF2	179	3.00E-53	40S ribosomal protein S10-3	SPBP22H7.08	125	8.00E-34	COG5045	pfam03501	S10_plectin	Plectin/S10 domain. This presumed domain is found at the N-terminus of some isoforms of the cytoskeletal muscle protein plectin as well as the ribosomal S10 protein. This domain may be involved in RNA binding.	GO:0000028|ribosomal small subunit assembly;	GO:0005618|cell wall;GO:0022626|cytosolic ribosome;GO:0022627|cytosolic small ribosomal subunit;GO:0016020|membrane;	GO:0003735|structural constituent of ribosome;	K02947	RP-S10e, RPS10; small subunit ribosomal protein S10e
Potri.007G012500.v3.0	391	393	280	207.4795049	42	60	51	7.725443685	2.949617792	6.38E-70	1.19E-68	up	yes	Potri.007G012500	protein_coding	chrChr07:981986-982477:+	gi|976928928|gb|KVI11808.1|	433	3.00E-52	Histone core [Cynara cardunculus var. scolymus]	gi|160333972|gb|AC214417.1|	323	1.00E-167	Populus trichocarpa clone POP037-E08, complete sequence	P0CG89	168	2.00E-52	Histone H4	.	.	.	.	pfam00125	Histone	Core histone H2A/H2B/H3/H4.	GO:0006334|nucleosome assembly;	GO:0009507|chloroplast;GO:0005829|cytosol;GO:0005730|nucleolus;GO:0000786|nucleosome;GO:0005886|plasma membrane;GO:0009506|plasmodesma;GO:0009579|thylakoid;GO:0005774|vacuolar membrane;	GO:0003677|DNA binding;	K11254	H4; histone H4
Potri.014G015000.v3.0	184	158	129	92.10608217	18	28	22	7.721069145	2.948800633	6.07E-33	5.18E-32	up	yes	Potri.014G015000	protein_coding	chrChr14:1478212-1479812:-	gi|566201845|ref|XP_002320683.2|	1042	6.00E-139	hypothetical protein POPTR_0014s01530g [Populus trichocarpa]	gi|743912039|ref|XM_011001589.1|	958	0	PREDICTED: Populus euphratica uncharacterized LOC105107600 (LOC105107600), mRNA	.	.	.	.	.	.	.	.	pfam13708	Methyltransf_27	Methyltransferase domain. This family contains methyltransferase domains.	.	.	.	.	.
Potri.014G162900.v3.0	472	462	356	252.412482	49	71	67	7.686279028	2.94228535	8.67E-85	2.07E-83	up	yes	Potri.014G162900	protein_coding	chrChr14:12850627-12852961:-	gi|566204549|ref|XP_002321171.2|	937	1.00E-120	hypothetical protein POPTR_0014s16100g [Populus trichocarpa]	gi|743910891|ref|XM_011000992.1|	1228	0	PREDICTED: Populus euphratica fasciclin-like arabinogalactan protein 7 (LOC105107165), transcript variant X1, mRNA	Q9SJ81	227	1.00E-68	Fasciclin-like arabinogalactan protein 7	.	.	.	.	pfam02469	Fasciclin	Fasciclin domain. This extracellular domain is found repeated four times in grasshopper fasciclin I as well as in proteins from mammals, sea urchins, plants, yeast and bacteria.	.	GO:0031225|anchored component of membrane;GO:0046658|anchored component of plasma membrane;GO:0016020|membrane;GO:0005886|plasma membrane;	.	.	.
Potri.010G237800.v3.0	794	699	545	398.370413	75	109	113	7.641316932	2.933821299	6.24E-115	2.32E-113	up	yes	Potri.010G237800	protein_coding	chrChr10:21685600-21688122:+	gi|566192554|ref|XP_002316501.2|	1835	0	hypothetical protein POPTR_0010s24430g [Populus trichocarpa]	gi|566192553|ref|XM_002316465.2|	1200	0	Populus trichocarpa hypothetical protein (POPTR_0010s24430g) mRNA, complete cds	.	.	.	.	.	.	.	.	pfam12697	Abhydrolase_6	Alpha/beta hydrolase family. This family contains alpha/beta hydrolase enzymes of diverse specificity.	.	.	.	.	.
Potri.001G004100.v3.0	1331	1221	1035	704.7192371	142	195	187	7.640608305	2.933687503	5.00E-196	4.50E-194	up	yes	Potri.001G004100	protein_coding	chrChr01:255986-257228:+	gi|566163852|ref|XP_002303994.2|	146	2.00E-08	hypothetical protein POPTR_0003s21020g, partial [Populus trichocarpa]	gi|118483823|gb|EF145663.1|	681	0	Populus trichocarpa clone WS0112_G15 unknown mRNA	.	.	.	.	.	.	.	.	pfam02592	DUF165	Uncharacterized ACR, YhhQ family COG1738.	.	.	.	.	.
Potri.007G016800.v3.0	233	228	171	124.0217148	30	29	34	7.522393697	2.911191814	6.49E-43	7.06E-42	up	yes	Potri.007G016800	protein_coding	chrChr07:1292572-1293933:-	gi|566181172|ref|XP_002310285.2|	2093	0	hypothetical protein POPTR_0007s13680g [Populus trichocarpa]	gi|566181171|ref|XM_002310249.2|	1359	0	Populus trichocarpa hypothetical protein (POPTR_0007s13680g) mRNA, complete cds	Q9FZ59	136	8.00E-33	Leucine-rich repeat receptor-like protein kinase PEPR2	.	.	.	.	pfam13855	LRR_8	Leucine rich repeat.	GO:0042742|defense response to bacterium;GO:0009753|response to jasmonic acid;GO:0009611|response to wounding;	GO:0016021|integral component of membrane;GO:0005886|plasma membrane;	GO:0005524|ATP binding;GO:0042277|peptide binding;GO:0004674|protein serine/threonine kinase activity;	.	.
Potri.003G065300.v3.0	3130	3002	2460	1690.829915	361	492	424	7.499412416	2.906777564	0	0	up	yes	Potri.003G065300	protein_coding	chrChr03:9391716-9392648:+	gi|118487720|gb|ABK95684.1|	907	6.00E-120	unknown [Populus trichocarpa]	gi|168176844|gb|AC217588.1|	933	0	Populus trichocarpa clone POP047-P10, complete sequence	Q9ZRA4	253	1.00E-81	Auxin-binding protein ABP19a	.	.	.	.	pfam00190	Cupin_1	Cupin. This family represents the conserved barrel domain of the 'cupin' superfamily ('cupa' is the Latin term for a small barrel). This family contains 11S and 7S plant seed storage proteins, and germins. Plant seed storage proteins provide the major nitrogen source for the developing plant.	GO:0009734|auxin-activated signaling pathway;	GO:0048046|apoplast;GO:0005618|cell wall;	GO:0030145|manganese ion binding;GO:0045735|nutrient reservoir activity;	.	.
Potri.002G251700.v3.0	192	236	144	111.4927132	19	28	38	7.474880778	2.902050569	2.93E-36	2.71E-35	up	yes	Potri.002G251700	protein_coding	chrChr02:24127500-24130449:-	gi|566159909|ref|XP_002303085.2|	3151	0	kinase-like protein TMKL1 precursor [Populus trichocarpa]	gi|566159908|ref|XM_002303049.2|	2258	0	Populus trichocarpa kinase-like protein TMKL1 precursor (POPTR_0002s25300g) mRNA, complete cds	P33543	918	0	Putative kinase-like protein TMKL1	CAC0404_1	53.9	8.00E-07	COG0515	pfam00069	Pkinase	Protein kinase domain.	.	GO:0016021|integral component of membrane;GO:0005886|plasma membrane;GO:0009506|plasmodesma;	GO:0005524|ATP binding;GO:0004672|protein kinase activity;	.	.
Potri.002G233000.v3.0	119	99	79	58.30894858	15	17	12	7.471359341	2.901370751	4.19E-21	2.47E-20	up	yes	Potri.002G233000	protein_coding	chrChr02:22599972-22600996:-	gi|566159590|ref|XP_002302893.2|	583	2.00E-72	hypothetical protein POPTR_0002s23410g [Populus trichocarpa]	gi|743898946|ref|XM_011044464.1|	692	0	PREDICTED: Populus euphratica uncharacterized protein At1g05835 (LOC105138409), mRNA	A8MS78	111	2.00E-28	Uncharacterized protein At1g05835	.	.	.	.	pfam05541	Spheroidin	Entomopoxvirus spheroidin protein. Entomopoxviruses (EPVs) are large (300-400 nm) oval-shaped viruses replicating in the cytoplasm of their insect host cells. At the end of their replicative cycle EPVs virions are occluded in a highly expressed protein called spheroidin. This protein forms large (5-20 mm long) oval-shaped occlusion bodies (OBs) called spherules. The infectious cycle of EPVs begin…	GO:0030163|protein catabolic process;GO:0006508|proteolysis;	GO:0031225|anchored component of membrane;GO:0046658|anchored component of plasma membrane;GO:0005886|plasma membrane;	GO:0004190|aspartic-type endopeptidase activity;	.	.
Potri.014G019200.v3.0	287	347	275	179.48141	37	47	52	7.466689904	2.900468816	2.99E-58	4.47E-57	up	yes	Potri.014G019200	protein_coding	chrChr14:1769750-1770498:-	gi|566201919|ref|XP_006374841.1|	746	4.00E-98	hypothetical protein POPTR_0014s01940g [Populus trichocarpa]	gi|566201918|ref|XM_006374779.1|	514	0	Populus trichocarpa hypothetical protein (POPTR_0014s01940g) mRNA, complete cds	Q9ZWT2	115	2.00E-30	Cytochrome B5 isoform D	SPCC16A11.10c	84	2.00E-19	COG5274	pfam00173	Cyt-b5	Cytochrome b5-like Heme/Steroid binding domain. This family includes heme binding domains from a diverse range of proteins. This family also includes proteins that bind to steroids. The family includes progesterone receptors. Many members of this subfamily are membrane anchored by an N-terminal transmembrane alpha helix. This family also includes a domain in some chitin synthases. There is no kno…	GO:0042742|defense response to bacterium;GO:0055114|oxidation-reduction process;	GO:0005783|endoplasmic reticulum;GO:0005789|endoplasmic reticulum membrane;GO:0016021|integral component of membrane;	GO:0020037|heme binding;GO:0046872|metal ion binding;	.	.
Potri.019G115900.v3.0	77	88	61	44.53713778	17	10	6	7.459718309	2.899121153	1.66E-15	7.75E-15	up	yes	Potri.019G115900	protein_coding	chrChr19:14459664-14463707:-	gi|566244180|ref|XP_006371624.1|	2527	0	hypothetical protein POPTR_0019s13790g [Populus trichocarpa]	gi|743908029|ref|XM_011049159.1|	1386	0	PREDICTED: Populus euphratica ankyrin repeat-containing protein At5g02620-like (LOC105141799), transcript variant X1, mRNA	Q8LPS2	97.8	7.00E-20	Protein ACCELERATED CELL DEATH 6	.	.	.	.	pfam13962	PGG	Domain of unknown function. The PGG domain is named for the highly conserved sequence motif found at the startt of the domain. The function is not known.	GO:0008219|cell death;GO:0071446|cellular response to salicylic acid stimulus;GO:0009816|defense response to bacterium, incompatible interaction;GO:1900426|positive regulation of defense response to bacterium;GO:1902290|positive regulation of defense response to oomycetes;GO:0016567|protein ubiquitination;GO:1900150|regulation of defense response to fungus;GO:2000031|regulation of salicylic acid …	GO:0030176|integral component of endoplasmic reticulum membrane;GO:0005887|integral component of plasma membrane;GO:0016020|membrane;	.	.	.
Potri.009G094200.v3.0	80	88	54	43.24944594	9	14	10	7.452122226	2.897651337	2.40E-16	1.16E-15	up	yes	Potri.009G094200	protein_coding	chrChr09:8528918-8530478:+	gi|224105637|ref|XP_002313882.1|	438	6.00E-51	hypothetical protein POPTR_0009s09720g [Populus trichocarpa]	gi|566187181|ref|XM_002313846.2|	661	0	Populus trichocarpa hypothetical protein (POPTR_0009s09720g) mRNA, complete cds	Q1G3M2	129	1.00E-35	LYR motif-containing protein At3g19508	.	.	.	.	pfam05347	Complex1_LYR	Complex 1 protein (LYR family). Proteins in this family include an accessory subunit of the higher eukaryotic NADH dehydrogenase complex. In Saccharomyces cerevisiae, the Isd11 protein has been shown to play a role in Fe/S cluster biogenesis in mitochondria. We have named this family LYR after a highly conserved tripeptide motif close to the N-terminus of these proteins.	GO:0008152|metabolic process;	GO:0048046|apoplast;	GO:0047513|1,2-alpha-L-fucosidase activity;	.	.
Potri.014G019700.v3.0	4016	4061	3149	2206.430207	422	672	592	7.446065447	2.896478297	0	0	up	yes	Potri.014G019700	protein_coding	chrChr14:1793508-1795367:-	gi|909836611|gb|AKU19321.1|	1979	0	putative progesterone 5beta-reductase [Populus trichocarpa]	gi|566201928|ref|XM_006374784.1|	1660	0	Populus trichocarpa hypothetical protein (POPTR_0014s01980g) mRNA, complete cds	Q9STX2	549	0	3-oxo-Delta(4,5)-steroid 5-beta-reductase	.	.	.	.	pfam01370	Epimerase	NAD dependent epimerase/dehydratase family. This family of proteins utilize NAD as a cofactor. The proteins in this family use nucleotide-sugar substrates for a variety of chemical reactions.	GO:0009611|response to wounding;GO:0008202|steroid metabolic process;GO:0010051|xylem and phloem pattern formation;	GO:0005829|cytosol;	GO:0047787|delta4-3-oxosteroid 5beta-reductase activity;GO:0035671|enone reductase activity;	.	.
Potri.001G099400.v3.0	100	96	78	54.0895298	12	18	12	7.275026506	2.862952504	5.38E-20	3.03E-19	up	yes	Potri.001G099400	protein_coding	chrChr01:7854148-7857398:+	gi|224053855|ref|XP_002298013.1|	2594	0	1-aminocyclopropane-1-carboxylate synthase family protein [Populus trichocarpa]	gi|566148155|ref|XM_002297977.2|	1824	0	Populus trichocarpa 1-aminocyclopropane-1-carboxylate synthase family protein (POPTR_0001s09850g) mRNA, complete cds	P31531	727	0	1-aminocyclopropane-1-carboxylate synthase	SP1544	106	8.00E-24	COG0436	pfam00155	Aminotran_1_2	Aminotransferase class I and II.	GO:0009693|ethylene biosynthetic process;GO:0009835|fruit ripening;	.	GO:0016847|1-aminocyclopropane-1-carboxylate synthase activity;GO:0030170|pyridoxal phosphate binding;	K01762	ACS; 1-aminocyclopropane-1-carboxylate synthase [EC:4.4.1.14]
Potri.008G010900.v3.0	90	94	76	51.39385833	12	22	6	7.267889954	2.861536575	1.23E-17	6.32E-17	up	yes	Potri.008G010900	protein_coding	chrChr08:601496-605289:+	gi|743868401|ref|XP_011032988.1|	2199	0	PREDICTED: nuclear migration and anchoring protein unc-84-like [Populus euphratica]	gi|743868400|ref|XM_011034686.1|	1548	0	PREDICTED: Populus euphratica nuclear migration and anchoring protein unc-84-like (LOC105131631), mRNA	Q9FF75	396	4.00E-130	Protein SAD1/UNC-84 domain protein 1	.	.	.	.	pfam07738	Sad1_UNC	Sad1 / UNC-like C-terminal. The C. elegans UNC-84 protein is a nuclear envelope protein that is involved in nuclear anchoring and migration during development. The S. pombe Sad1 protein localizes at the spindle pole body. UNC-84 and and Sad1 share a common C-terminal region, that is often termed the SUN (Sad1 and UNC) domain. In mammals, the SUN domain is present in two proteins, Sun1 and Sun2. T…	GO:0006997|nucleus organization;GO:0051291|protein heterooligomerization;GO:0051260|protein homooligomerization;GO:0090435|protein localization to nuclear envelope;	GO:0005856|cytoskeleton;GO:0005783|endoplasmic reticulum;GO:0005789|endoplasmic reticulum membrane;GO:0016021|integral component of membrane;GO:0005635|nuclear envelope;GO:0005637|nuclear inner membrane;GO:0009524|phragmoplast;	GO:0043495|protein anchor;	K19347	SUN1_2; SUN domain-containing protein 1/2
Potri.005G205700.v3.0	274	269	166	138.2125266	24	50	35	7.232510056	2.854496424	5.47E-42	5.82E-41	up	yes	Potri.005G205700	protein_coding	chrChr05:22025270-22030068:-	gi|566172759|ref|XP_002307564.2|	2243	0	hypothetical protein POPTR_0005s22730g [Populus trichocarpa]	gi|743902794|ref|XM_011046444.1|	1658	0	PREDICTED: Populus euphratica uncharacterized LOC105139835 (LOC105139835), transcript variant X2, mRNA	F4IDQ5	280	7.00E-84	Protein JASON	.	.	.	.	pfam01223	Endonuclease_NS	DNA/RNA non-specific endonuclease.	GO:0007142|male meiosis II;GO:0009556|microsporogenesis;GO:0006355|regulation of transcription, DNA-templated;	.	.	.	.
Potri.014G126900.v3.0	3948	4078	3147	2205.172689	464	645	615	7.224158429	2.852829532	0	0	up	yes	Potri.014G126900	protein_coding	chrChr14:9742752-9745523:-	gi|224131088|ref|XP_002320998.1|	2450	0	endo-1 family protein [Populus trichocarpa]	gi|566203897|ref|XM_002320962.2|	1970	0	Populus trichocarpa endo-1 family protein (POPTR_0014s12170g) mRNA, complete cds	O81416	799	0	Endoglucanase 17	.	.	.	.	pfam00759	Glyco_hydro_9	Glycosyl hydrolase family 9.	GO:0071555|cell wall organization;GO:0030245|cellulose catabolic process;	GO:0005576|extracellular region;	GO:0008810|cellulase activity;	.	.
Potri.013G048800.v3.0	57	78	84	44.23996593	9	17	9	7.122294309	2.832342052	1.21E-14	5.42E-14	up	yes	Potri.013G048800	protein_coding	chrChr13:3560171-3563721:-	gi|224125742|ref|XP_002319664.1|	5211	0	clavata1 receptor kinase family protein [Populus trichocarpa]	gi|566199446|ref|XM_002319628.2|	3351	0	Populus trichocarpa clavata1 receptor kinase family protein (POPTR_0013s04630g) mRNA, complete cds	Q9FRS6	1306	0	Leucine-rich repeat receptor-like protein kinase PXL1	alr0124_1	127	8.00E-30	COG4886	pfam00069	Pkinase	Protein kinase domain.	GO:0030154|cell differentiation;GO:0010067|procambium histogenesis;GO:0001944|vasculature development;	GO:0016021|integral component of membrane;GO:0005886|plasma membrane;	GO:0005524|ATP binding;GO:0004674|protein serine/threonine kinase activity;	.	.
Potri.018G021900.v3.0	49	55	43	29.20720771	8	7	8	7.086780613	2.825130388	2.02E-11	7.64E-11	up	yes	Potri.018G021900	protein_coding	chrChr18:1743742-1745095:-	gi|224141937|ref|XP_002324317.1|	786	3.00E-100	hypothetical protein POPTR_0018s02280g [Populus trichocarpa]	gi|743882061|ref|XM_011038345.1|	1099	0	PREDICTED: Populus euphratica ethylene-responsive transcription factor ERF003-like (LOC105134077), mRNA	Q94AW5	169	2.00E-48	Ethylene-responsive transcription factor ERF003	.	.	.	.	pfam00847	AP2	AP2 domain. This 60 amino acid residue domain can bind to DNA and is found in transcription factor proteins.	GO:0009873|ethylene-activated signaling pathway;GO:0006351|transcription, DNA-templated;	GO:0005634|nucleus;	GO:0003677|DNA binding;GO:0003700|transcription factor activity, sequence-specific DNA binding;	.	.
Potri.001G255500.v3.0	80	74	66	43.62027319	6	14	15	7.081474485	2.824049786	5.05E-16	2.41E-15	up	yes	Potri.001G255500	protein_coding	chrChr01:26505644-26508457:-	gi|566151085|ref|XP_002298292.2|	1416	0	hypothetical protein POPTR_0001s26250g [Populus trichocarpa]	gi|743904065|ref|XR_845168.1|	645	0	PREDICTED: Populus euphratica zinc finger CCCH domain-containing protein 53-like (LOC105140309), transcript variant X2, misc_RNA	Q9SV09	326	5.00E-101	Zinc finger CCCH domain-containing protein 46	.	.	.	.	pfam14259	RRM_6	RNA recognition motif (a.k.a. RRM, RBD, or RNP domain).	.	.	GO:0003677|DNA binding;GO:0046872|metal ion binding;GO:0004518|nuclease activity;GO:0000166|nucleotide binding;GO:0003723|RNA binding;	.	.
Potri.005G010700.v3.0	693	687	568	386.2446544	77	114	117	7.072655556	2.822252003	6.97E-117	2.63E-115	up	yes	Potri.005G010700	protein_coding	chrChr05:793482-795500:-	gi|566168769|ref|XP_006382362.1|	1382	0	hypothetical protein POPTR_0005s01430g [Populus trichocarpa]	gi|566168768|ref|XM_006382300.1|	988	0	Populus trichocarpa hypothetical protein (POPTR_0005s01430g) mRNA, complete cds	O23403	320	8.00E-106	PsbP domain-containing protein 1, chloroplastic	.	.	.	.	pfam01789	PsbP	PsbP. This family consists of the 23 kDa subunit of oxygen evolving system of photosystem II or PsbP from various plants (where it is encoded by the nuclear genome) and Cyanobacteria. The 23 KDa PsbP protein is required for PSII to be fully operational in vivo, it increases the affinity of the water oxidation site for Cl- and provides the conditions required for high affinity binding of Ca2+.	GO:0048564|photosystem I assembly;	GO:0009507|chloroplast;GO:0009570|chloroplast stroma;GO:0009543|chloroplast thylakoid lumen;GO:0009535|chloroplast thylakoid membrane;GO:0019898|extrinsic component of membrane;GO:0016020|membrane;GO:0009654|photosystem II oxygen evolving complex;GO:0009579|thylakoid;GO:0031977|thylakoid lumen;	GO:0005509|calcium ion binding;	.	.
Potri.012G035200.v3.0	251	241	189	134.5913229	25	43	40	7.046652837	2.816938139	4.00E-45	4.57E-44	up	yes	Potri.012G035200	protein_coding	chrChr12:3138099-3139413:+	gi|224120536|ref|XP_002318354.1|	1092	2.00E-146	hypothetical protein POPTR_0012s01020g [Populus trichocarpa]	gi|566196162|ref|XM_002318318.2|	1169	0	Populus trichocarpa hypothetical protein (POPTR_0012s01020g) mRNA, complete cds	Q84JK8	145	6.00E-39	Probable membrane-associated kinase regulator 6	.	.	.	.	pfam14145	YrhK	YrhK-like protein. The YrhK-like protein family includes the B. subtilis YrhK protein, which is functionally uncharacterized. Its expression is under the control of the motility sigma factor sigma-D. This domain family is found in bacteria, archaea and eukaryotes, and is approximately 60 amino acids in length.	GO:0009738|abscisic acid-activated signaling pathway;	GO:0005886|plasma membrane;	.	.	.
Potri.003G207400.v3.0	409	430	360	238.5220848	52	69	70	7.014787545	2.81039941	5.00E-76	1.05E-74	up	yes	Potri.003G207400	protein_coding	chrChr03:20796262-20800029:+	gi|224075768|ref|XP_002304759.1|	2182	0	hypothetical protein POPTR_0003s22270g [Populus trichocarpa]	gi|743897540|ref|XM_011043762.1|	1628	0	PREDICTED: Populus euphratica uncharacterized LOC105137860 (LOC105137860), transcript variant X2, mRNA	.	.	.	.	.	.	.	.	pfam08702	Fib_alpha	Fibrinogen alpha/beta chain family. Fibrinogen is a protein involved in platelet aggregation and is essential for the coagulation of blood. This domain forms part of the central coiled coiled region of the protein which is formed from two sets of three non-identical chains (alpha, beta and gamma).	.	.	.	.	.
Potri.001G271900.v3.0	280	340	213	163.8783997	37	65	30	7.009616755	2.809335568	1.73E-44	1.95E-43	up	yes	Potri.001G271900	protein_coding	chrChr01:27932885-27934667:-	gi|224059674|ref|XP_002299964.1|	1613	0	hypothetical protein POPTR_0001s27880g [Populus trichocarpa]	gi|566151369|ref|XM_002299928.2|	1753	0	Populus trichocarpa hypothetical protein (POPTR_0001s27880g) mRNA, complete cds	Q6NPN5	357	9.00E-116	F-box/kelch-repeat protein At5g26960	.	.	.	.	pfam01344	Kelch_1	Kelch motif. The kelch motif was initially discovered in Kelch. In this protein there are six copies of the motif. It has been shown that the Drosophila ring canal kelch protein is related to Galactose Oxidase for which a structure has been solved. The kelch motif forms a beta sheet. Several of these sheets associate to form a beta propeller structure as found in pfam00064, pfam00400 and pfam0041…	GO:0016567|protein ubiquitination;	GO:0031463|Cul3-RING ubiquitin ligase complex;	.	.	.
Potri.008G034100.v3.0	891	894	688	490.145375	113	147	135	6.963712592	2.799856661	1.53E-144	8.23E-143	up	yes	Potri.008G034100	protein_coding	chrChr08:1886944-1888996:+	gi|566182142|ref|XP_006379531.1|	2396	0	hypothetical protein POPTR_0008s03410g [Populus trichocarpa]	gi|566182141|ref|XM_006379469.1|	1755	0	Populus trichocarpa hypothetical protein (POPTR_0008s03410g) mRNA, complete cds	Q70PR7	218	1.00E-62	Vinorine synthase	.	.	.	.	pfam02458	Transferase	Transferase family. This family includes a number of transferase enzymes. These include anthranilate N-hydroxycinnamoyl/benzoyltransferase that catalyses the first committed reaction of phytoalexin biosynthesis. Deacetylvindoline 4-O-acetyltransferase EC:2.3.1.107 catalyses the last step in vindoline biosynthesis is also a member of this family. The motif HXXXD is probably part of the active site…	GO:0009820|alkaloid metabolic process;	.	GO:0050636|vinorine synthase activity;	K12694	E2.3.1.160; vinorine synthase [EC:2.3.1.160]
Potri.004G032100.v3.0	1594	1574	1189	863.4774068	233	238	220	6.953809132	2.797803469	9.64E-183	7.55E-181	up	yes	Potri.004G032100	protein_coding	chrChr04:2320115-2322402:-	gi|224078830|ref|XP_002305644.1|	1006	3.00E-128	hypothetical protein POPTR_0004s03220g [Populus trichocarpa]	gi|743918795|ref|XM_011005106.1|	727	0	PREDICTED: Populus euphratica putative cyclin-D6-1 (LOC105110160), mRNA	Q9ZR04	163	4.00E-45	Putative cyclin-D6-1	.	.	.	.	pfam00134	Cyclin_N	Cyclin, N-terminal domain. Cyclins regulate cyclin dependent kinases (CDKs). Human cyclin-O is a Uracil-DNA glycosylase that is related to other cyclins. Cyclins contain two domains of similar all-alpha fold, of which this family corresponds with the N-terminal domain.	GO:0007049|cell cycle;GO:0051301|cell division;GO:0051726|regulation of cell cycle;	GO:0005634|nucleus;	.	K18812	CYCD6; cyclin D6, plant
Potri.013G066500.v3.0	120	149	137	81.70961839	24	17	24	6.950955655	2.797211341	1.78E-25	1.22E-24	up	yes	Potri.013G066500	protein_coding	chrChr13:5118331-5121619:-	gi|566199743|ref|XP_006375921.1|	4031	0	C2 domain-containing family protein [Populus trichocarpa]	gi|566199742|ref|XM_006375859.1|	3086	0	Populus trichocarpa C2 domain-containing family protein (POPTR_0013s06270g) mRNA, complete cds	B8XCH5	781	0	Protein QUIRKY	.	.	.	.	pfam08372	PRT_C	Plant phosphoribosyltransferase C-terminal. This domain is found at the C-terminus of phosphoribosyltransferases and phosphoribosyltransferase-like proteins. It contains putative transmembrane regions. It often appears together with calcium-ion dependent C2 domains (pfam00168).	.	GO:0016021|integral component of membrane;GO:0005886|plasma membrane;GO:0009506|plasmodesma;	GO:0005509|calcium ion binding;GO:0005544|calcium-dependent phospholipid binding;GO:0016757|transferase activity, transferring glycosyl groups;	.	.
Potri.010G211500.v3.0	150	139	93	75.09743612	16	26	19	6.946708526	2.796329565	1.94E-25	1.33E-24	up	yes	Potri.010G211500	protein_coding	chrChr10:20007756-20009694:+	gi|566192088|ref|XP_006378740.1|	351	2.00E-37	hypothetical protein POPTR_0010s21830g [Populus trichocarpa]	gi|566192087|ref|XM_006378678.1|	690	0	Populus trichocarpa hypothetical protein (POPTR_0010s21830g) mRNA, complete cds	.	.	.	.	.	.	.	.	pfam09713	A_thal_3526	Plant protein 1589 of unknown function (A_thal_3526). This plant-specific family of proteins is defined by an uncharacterized region 57 residues in length. It is found toward the N terminus of most proteins that contain it. Examples include at least several proteins from Arabidopsis thaliana and Oryza sativa. The function of the proteins are unknown.	.	.	.	.	.
Potri.009G026000.v3.0	438	444	330	239.76177	48	79	68	6.933040212	2.793488128	1.56E-75	3.23E-74	up	yes	Potri.009G026000	protein_coding	chrChr09:3699305-3705565:+	gi|566186043|ref|XP_006379005.1|	5021	0	hypothetical protein POPTR_0009s03110g [Populus trichocarpa]	gi|566186042|ref|XM_006378943.1|	3381	0	Populus trichocarpa hypothetical protein (POPTR_0009s03110g) mRNA, complete cds	Q9LZU5	1490	0	Kinesin-like protein KIN-5D	SPAC25G10.07c	344	8.00E-99	COG5059	pfam00225	Kinesin	Kinesin motor domain.	GO:0007018|microtubule-based movement;	GO:0005737|cytoplasm;GO:0005871|kinesin complex;GO:0005874|microtubule;GO:0005886|plasma membrane;GO:0005819|spindle;	GO:0005524|ATP binding;GO:0008574|ATP-dependent microtubule motor activity, plus-end-directed;	K10398	KIF11, EG5; kinesin family member 11
Potri.001G367900.v3.0	2308	2253	1876	1280.398794	262	391	391	6.901833006	2.786979567	3.37E-283	6.05E-281	up	yes	Potri.001G367900	protein_coding	chrChr01:38081667-38084340:+	gi|566153320|ref|XP_002298869.2|	1669	0	hypothetical protein POPTR_0001s37650g [Populus trichocarpa]	gi|566153319|ref|XM_002298833.2|	1538	0	Populus trichocarpa hypothetical protein (POPTR_0001s37650g) mRNA, complete cds	Q9FM65	454	4.00E-154	Fasciclin-like arabinogalactan protein 1	.	.	.	.	pfam02469	Fasciclin	Fasciclin domain. This extracellular domain is found repeated four times in grasshopper fasciclin I as well as in proteins from mammals, sea urchins, plants, yeast and bacteria.	GO:0048364|root development;GO:0048367|shoot system development;	GO:0031225|anchored component of membrane;GO:0046658|anchored component of plasma membrane;GO:0005618|cell wall;GO:0005886|plasma membrane;	.	.	.
Potri.018G065400.v3.0	227	213	175	122.4766083	32	39	29	6.835648416	2.773078196	3.31E-40	3.38E-39	up	yes	Potri.018G065400	protein_coding	chrChr18:8275012-8277441:-	gi|566214678|ref|XP_006372002.1|	1681	0	hypothetical protein POPTR_0018s07140g [Populus trichocarpa]	gi|566214677|ref|XM_006371940.1|	1765	0	Populus trichocarpa hypothetical protein (POPTR_0018s07140g) mRNA, complete cds	Q6ZIK5	196	3.00E-54	Growth-regulating factor 4	.	.	.	.	pfam08879	WRC	WRC. The WRC domain, named after the conserved Trp-Arg-Cys motif, contains two distinctive features: a putative nuclear localisation signal and a zinc-finger motif (C3H). It is suggested that the WRC domain functions in DNA binding.	GO:0032502|developmental process;GO:0006355|regulation of transcription, DNA-templated;GO:0006351|transcription, DNA-templated;	GO:0005634|nucleus;	GO:0005524|ATP binding;	.	.
Potri.015G056100.v3.0	335	355	249	185.8275208	38	55	60	6.828545621	2.771578339	1.15E-58	1.73E-57	up	yes	Potri.015G056100	protein_coding	chrChr15:7646919-7649014:+	gi|566206247|ref|XP_006374382.1|	755	4.00E-98	hypothetical protein POPTR_0015s06660g [Populus trichocarpa]	gi|566206246|ref|XM_006374320.1|	816	0	Populus trichocarpa hypothetical protein (POPTR_0015s06660g) mRNA, complete cds	Q9FNP8	269	1.00E-89	40S ribosomal protein S19-3	SPBC649.02	157	1.00E-46	COG2238	pfam01090	Ribosomal_S19e	Ribosomal protein S19e.	GO:0006412|translation;	GO:0005829|cytosol;GO:0022626|cytosolic ribosome;GO:0022627|cytosolic small ribosomal subunit;GO:0005773|vacuole;	GO:0003735|structural constituent of ribosome;	K02966	RP-S19e, RPS19; small subunit ribosomal protein S19e
Potri.015G129900.v3.0	82	67	59	41.41702422	9	10	15	6.815958005	2.768916447	6.51E-15	2.96E-14	up	yes	Potri.015G129900	protein_coding	chrChr15:14138164-14141019:-	gi|566207583|ref|XP_002322413.2|	1159	1.00E-155	nucleotide-sensitive chloride conductance regulator family protein [Populus trichocarpa]	gi|566207582|ref|XM_002322377.2|	1325	0	Populus trichocarpa nucleotide-sensitive chloride conductance regulator family protein (POPTR_0015s14500g) mRNA, complete cds	Q9LVA7	273	1.00E-87	Chloride conductance regulatory protein ICln	.	.	.	.	pfam03517	Voldacs	Regulator of volume decrease after cellular swelling. ICln is a ubiquitously expressed multi-functional protein that plays a critical role in regulating volume decrease in cells after cellular swelling. In plants, ICln induces Cl- currents, thus regulating Cl- homoeostasis in eukaryotes. Structurally, the fold resembles a pleckstrin homology fold, on of whose roles is to recruit and tether their …	GO:0006884|cell volume homeostasis;GO:0006821|chloride transport;GO:0000387|spliceosomal snRNP assembly;	GO:0005829|cytosol;GO:0034709|methylosome;GO:0005634|nucleus;GO:0034715|pICln-Sm protein complex;GO:0005886|plasma membrane;	.	K05019	CLNS1A; chloride channel, nucleotide-sensitive, 1A
Potri.T029100.v3.0	78	45	54	35.49760459	9	9	11	6.809588691	2.76756766	2.94E-12	1.17E-11	up	yes	Potri.T029100	protein_coding	chrscaffold_31:35939-36789:-	gi|242346633|gb|ACS92485.1|	1068	7.00E-145	Kunitz-type protease inhibitor KPI-A2.2 [Populus trichocarpa]	gi|242346632|gb|GQ184780.1|	849	0	Populus trichocarpa Kunitz-type protease inhibitor KPI-A2.2 mRNA, complete cds	P16335	248	2.00E-80	Wound-responsive protein GWIN3	.	.	.	.	pfam00197	Kunitz_legume	Trypsin and protease inhibitor.	.	.	GO:0004866|endopeptidase inhibitor activity;	.	.
Potri.017G081300.v3.0	403	403	312	222.3614338	52	62	69	6.793255351	2.764103085	3.61E-70	6.80E-69	up	yes	Potri.017G081300	protein_coding	chrChr17:9548795-9550067:+	gi|566212793|ref|XP_002323848.2|	382	2.00E-43	hypothetical protein POPTR_0017s11760g [Populus trichocarpa]	gi|566212792|ref|XM_002323812.2|	731	0	Populus trichocarpa hypothetical protein (POPTR_0017s11760g) mRNA, complete cds	Q9LJX1	127	3.00E-35	Transcription factor PRE5	.	.	.	.	pfam00010	HLH	Helix-loop-helix DNA-binding domain.	GO:0009740|gibberellic acid mediated signaling pathway;GO:0040008|regulation of growth;GO:0006355|regulation of transcription, DNA-templated;GO:0006351|transcription, DNA-templated;	.	.	.	.
Potri.006G228400.v3.0	535	588	473	318.3111524	64	105	95	6.772985673	2.759791944	2.61E-94	7.17E-93	up	yes	Potri.006G228400	protein_coding	chrChr06:23938533-23940946:-	gi|566177932|ref|XP_002309500.2|	2697	0	hypothetical protein POPTR_0006s24480g [Populus trichocarpa]	gi|566177931|ref|XM_002309464.2|	2206	0	Populus trichocarpa hypothetical protein (POPTR_0006s24480g) mRNA, complete cds	Q9M9C5	356	7.00E-110	Probable leucine-rich repeat receptor-like protein kinase At1g68400	BS_yloP_1	57.8	4.00E-08	COG0515	pfam00069	Pkinase	Protein kinase domain.	.	GO:0016021|integral component of membrane;GO:0005886|plasma membrane;	GO:0005524|ATP binding;GO:0004674|protein serine/threonine kinase activity;	.	.
Potri.009G160600.v3.0	67	65	55	37.27760833	7	13	11	6.764208435	2.757921116	7.37E-14	3.18E-13	up	yes	Potri.009G160600	protein_coding	chrChr09:12388977-12394464:+	gi|566188293|ref|XP_002313605.2|	2323	0	putative Ruv DNA-helicase family protein [Populus trichocarpa]	gi|566188292|ref|XM_002313569.2|	1626	0	Populus trichocarpa putative Ruv DNA-helicase family protein (POPTR_0009s16220g) mRNA, complete cds	Q9FMR9	685	0	RuvB-like protein 1	SPAPB8E5.09	507	1.00E-174	COG1224	pfam06068	TIP49	TIP49 C-terminus. This family consists of the C-terminal region of several eukaryotic and archaeal RuvB-like 1 (Pontin or TIP49a) and RuvB-like 2 (Reptin or TIP49b) proteins. The N-terminal domain contains the pfam00004 domain. In zebrafish, the liebeskummer (lik) mutation, causes development of hyperplastic embryonic hearts. lik encodes Reptin, a component of a DNA-stimulated ATPase complex. Bet…	GO:0000492|box C/D snoRNP assembly;GO:0030154|cell differentiation;GO:0006338|chromatin remodeling;GO:0006281|DNA repair;GO:0009908|flower development;GO:0016573|histone acetylation;GO:0048507|meristem development;GO:2000072|regulation of defense response to fungus, incompatible interaction;GO:0006357|regulation of transcription from RNA polymerase II promoter;	GO:0009507|chloroplast;GO:0005829|cytosol;GO:0031011|Ino80 complex;GO:0035267|NuA4 histone acetyltransferase complex;GO:0005730|nucleolus;GO:0005634|nucleus;GO:0097255|R2TP complex;GO:0000812|Swr1 complex;	GO:0005524|ATP binding;GO:0043141|ATP-dependent 5'-3' DNA helicase activity;GO:0004003|ATP-dependent DNA helicase activity;	K04499	RUVBL1, RVB1, INO80H; RuvB-like protein 1 (pontin 52)
Potri.019G094100.v3.0	413	390	333	227.1644874	68	41	75	6.721786703	2.748844763	8.99E-19	4.85E-18	up	yes	Potri.019G094100	protein_coding	chrChr19:12414551-12415896:-	gi|224146534|ref|XP_002326042.1|	1291	5.00E-176	hypothetical protein POPTR_0019s12390g [Populus trichocarpa]	gi|566242229|ref|XM_002326006.2|	978	0	Populus trichocarpa hypothetical protein (POPTR_0019s12390g) mRNA, complete cds	P27054	353	5.00E-119	Endochitinase PR4	.	.	.	.	pfam00182	Glyco_hydro_19	Chitinase class I.	GO:0016998|cell wall macromolecule catabolic process;GO:0006032|chitin catabolic process;GO:0006952|defense response;GO:0000272|polysaccharide catabolic process;	.	GO:0008061|chitin binding;GO:0004568|chitinase activity;	.	.
Potri.011G025200.v3.0	771	702	554	403.5718857	103	135	98	6.696759778	2.743463217	9.93E-106	3.21E-104	up	yes	Potri.011G025200	protein_coding	chrChr11:2086705-2088614:-	gi|224116086|ref|XP_002317206.1|	1760	0	hypothetical protein POPTR_0011s00500g [Populus trichocarpa]	gi|566192937|ref|XM_002317170.2|	1329	0	Populus trichocarpa hypothetical protein (POPTR_0011s00500g) mRNA, complete cds	F6H7K5	604	0	Thiamine thiazole synthase 2, chloroplastic	SPBC26H8.01	359	4.00E-118	COG1635	pfam01946	Thi4	Thi4 family. This family includes a putative thiamine biosynthetic enzyme.	GO:0006950|response to stress;GO:0009228|thiamine biosynthetic process;GO:0052837|thiazole biosynthetic process;	GO:0009570|chloroplast stroma;GO:0005829|cytosol;	GO:0046872|metal ion binding;GO:0016491|oxidoreductase activity;	K03146	THI4, THI1; thiamine thiazole synthase
Potri.018G053000.v3.0	517	520	391	284.468566	69	92	78	6.641553362	2.731520706	2.89E-86	7.06E-85	up	yes	Potri.018G053000	protein_coding	chrChr18:5530761-5532577:-	gi|118487064|gb|ABK95362.1|	1195	4.00E-160	unknown [Populus trichocarpa]	gi|118487063|gb|EF147345.1|	1163	0	Populus trichocarpa clone WS0122_M24 unknown mRNA	.	.	.	.	.	.	.	.	pfam14364	DUF4408	Domain of unknown function (DUF4408). This domain is found at the N-terminus of member of the DUF761 family pfam05553. Many members are plant proteins.	.	.	.	.	.
Potri.005G258900.v3.0	1531	1608	1261	878.8419161	199	298	245	6.62094016	2.727036091	6.19E-219	7.02E-217	up	yes	Potri.005G258900	protein_coding	chrChr05:25788772-25791555:+	gi|224083390|ref|XP_002307008.1|	2426	0	hypothetical protein POPTR_0005s28030g [Populus trichocarpa]	gi|566173657|ref|XM_002306972.2|	1944	0	Populus trichocarpa hypothetical protein (POPTR_0005s28030g) mRNA, complete cds	O22807	709	0	Galactan beta-1,4-galactosyltransferase GALS1	.	.	.	.	pfam01697	Glyco_transf_92	Glycosyltransferase family 92. Members of this family act as galactosyltransferases, belonging to glycosyltransferase family 92. The aligned region contains several conserved cysteine residues and several charged residues that may be catalytic residues. This is supported by the inclusion of this family in the GT-A glycosyl transferase superfamily.	GO:0042546|cell wall biogenesis;GO:0071555|cell wall organization;GO:0045489|pectin biosynthetic process;	GO:0005794|Golgi apparatus;GO:0000139|Golgi membrane;GO:0016021|integral component of membrane;	GO:0048531|beta-1,3-galactosyltransferase activity;	.	.
Potri.012G006300.v3.0	96	99	95	58.7183637	19	14	16	6.574859004	2.716959956	2.11E-19	1.17E-18	up	yes	Potri.012G006300	protein_coding	chrChr12:544007-552418:+	gi|743900906|ref|XP_011043760.1|	1815	0	PREDICTED: flavanone 3-dioxygenase-like [Populus euphratica]	gi|743900905|ref|XM_011045458.1|	1206	0	PREDICTED: Populus euphratica flavanone 3-dioxygenase-like (LOC105139126), transcript variant X1, mRNA	Q9FLV0	506	3.00E-176	Protein DOWNY MILDEW RESISTANCE 6	PA4191	110	5.00E-26	COG3491	pfam03171	2OG-FeII_Oxy	2OG-Fe(II) oxygenase superfamily. This family contains members of the 2-oxoglutarate (2OG) and Fe(II)-dependent oxygenase superfamily. This family includes the C-terminal of prolyl 4-hydroxylase alpha subunit. The holoenzyme has the activity EC:1.14.11.2 catalyzing the reaction: Procollagen L-proline + 2-oxoglutarate + O2 <=> procollagen trans- 4-hydroxy-L-proline + succinate + CO2. The full enzy…	GO:0042742|defense response to bacterium;GO:0002229|defense response to oomycetes;GO:0009813|flavonoid biosynthetic process;GO:0009617|response to bacterium;GO:0009620|response to fungus;GO:0002239|response to oomycetes;GO:0009751|response to salicylic acid;GO:0046244|salicylic acid catabolic process;	.	GO:0033759|flavone synthase activity;GO:0046872|metal ion binding;	.	.
Potri.009G167800.v3.0	390	444	390	246.2152643	48	88	74	6.5704169	2.715984914	8.42E-68	1.52E-66	up	yes	Potri.009G167800	protein_coding	chrChr09:12766346-12767823:-	gi|566188388|ref|XP_002312800.2|	1746	0	hypothetical protein POPTR_0009s16900g [Populus trichocarpa]	gi|566188387|ref|XM_002312764.2|	1478	0	Populus trichocarpa hypothetical protein (POPTR_0009s16900g) mRNA, complete cds	Q9SII5	499	4.00E-173	Protein EXORDIUM-like 5	.	.	.	.	pfam04674	Phi_1	Phosphate-induced protein 1 conserved region. Family of conserved plant proteins. Conserved region identified in a phosphate-induced protein of unknown function.	.	GO:0048046|apoplast;GO:0005615|extracellular space;	.	.	.
Potri.005G045600.v3.0	649	741	590	397.5543286	100	109	129	6.521422436	2.705186676	6.22E-105	1.99E-103	up	yes	Potri.005G045600	protein_coding	chrChr05:3345737-3350070:-	gi|566169489|ref|XP_006382714.1|	2533	0	hypothetical protein POPTR_0005s04710g [Populus trichocarpa]	gi|566169488|ref|XM_006382652.1|	2081	0	Populus trichocarpa hypothetical protein (POPTR_0005s04710g) mRNA, complete cds	O04658	768	0	Probable nucleolar protein 5-1	SPAC23G3.06	495	1.00E-166	COG1498	pfam01798	Nop	Putative snoRNA binding domain. This family consists of various Pre RNA processing ribonucleoproteins. The function of the aligned region is unknown however it may be a common RNA or snoRNA or Nop1p binding domain. Nop5p (Nop58p) from yeast is the protein component of a ribonucleoprotein protein required for pre-18s rRNA processing and is suggested to function with Nop1p in a snoRNA complex. Nop5…	GO:0000154|rRNA modification;	GO:0031428|box C/D snoRNP complex;GO:0005730|nucleolus;GO:0009506|plasmodesma;GO:0032040|small-subunit processome;	GO:0030515|snoRNA binding;	K14565	NOP58; nucleolar protein 58
Potri.005G251400.v3.0	379	435	316	225.8659784	56	77	60	6.51338388	2.703407257	1.89E-67	3.39E-66	up	yes	Potri.005G251400	protein_coding	chrChr05:25349416-25352934:-	gi|566173505|ref|XP_002307791.2|	2152	0	cyclin family protein [Populus trichocarpa]	gi|566173504|ref|XM_002307755.2|	1455	0	Populus trichocarpa cyclin family protein (POPTR_0005s27280g) mRNA, complete cds	Q9SFW6	539	0	Cyclin-B2-4	SPBC582.03	191	3.00E-52	COG5024	pfam00134	Cyclin_N	Cyclin, N-terminal domain. Cyclins regulate cyclin dependent kinases (CDKs). Human cyclin-O is a Uracil-DNA glycosylase that is related to other cyclins. Cyclins contain two domains of similar all-alpha fold, of which this family corresponds with the N-terminal domain.	GO:0007049|cell cycle;GO:0051301|cell division;	GO:0005634|nucleus;	.	K05868	CCNB; cyclin B
Potri.007G055400.v3.0	252	356	261	174.3619501	41	55	53	6.511944069	2.703088308	4.61E-48	5.62E-47	up	yes	Potri.007G055400	protein_coding	chrChr07:5816283-5822096:+	gi|566180441|ref|XP_006380612.1|	6060	0	hypothetical protein POPTR_0007s09810g [Populus trichocarpa]	gi|566180440|ref|XM_006380550.1|	3618	0	Populus trichocarpa hypothetical protein (POPTR_0007s09810g) mRNA, complete cds	Q2TAW0	228	2.00E-59	Condensin-2 complex subunit G2	.	.	.	.	pfam12422	Condensin2nSMC	Condensin II non structural maintenance of chromosomes subunit. This domain family is found in eukaryotes, and is approximately 150 amino acids in length. This family is part of a non-SMC subunit of condensin II which is involved in maintenance of the structural integrity of chromosomes. Condensin II is made up of SMC (structural maintenance of chromosomes) and non-SMC subunits. The non-SMC subun…	GO:0051301|cell division;GO:0030261|chromosome condensation;GO:0007067|mitotic nuclear division;	GO:0005634|nucleus;	.	K11492	NCAPG2, LUZP5; condensin-2 complex subunit G2
Potri.001G103300.v3.0	513	597	454	312.9898155	59	104	107	6.496530329	2.699669408	1.23E-84	2.94E-83	up	yes	Potri.001G103300	protein_coding	chrChr01:8229195-8233362:-	gi|224058479|ref|XP_002299528.1|	3856	0	PIGMENT DEFECTIVE EMBRYO family protein [Populus trichocarpa]	gi|566148084|ref|XM_002299492.2|	2755	0	Populus trichocarpa PIGMENT DEFECTIVE EMBRYO family protein (POPTR_0001s09480g) mRNA, complete cds	Q65JY4	331	4.00E-101	UDP-N-acetylmuramoyl-L-alanyl-D-glutamate--2,6-diaminopimelate ligase	BS_murE	318	6.00E-97	COG0769	pfam08245	Mur_ligase_M	Mur ligase middle domain.	GO:0007049|cell cycle;GO:0051301|cell division;GO:0071555|cell wall organization;GO:0009252|peptidoglycan biosynthetic process;GO:0008360|regulation of cell shape;	GO:0005737|cytoplasm;	GO:0005524|ATP binding;GO:0000287|magnesium ion binding;GO:0008765|UDP-N-acetylmuramoylalanyl-D-glutamate-2,6-diaminopimelate ligase activity;	K01928	murE; UDP-N-acetylmuramoyl-L-alanyl-D-glutamate--2,6-diaminopimelate ligase [EC:6.3.2.13]
Potri.005G043100.v3.0	230	208	181	124.3299213	32	49	26	6.45881464	2.691269417	4.36E-37	4.13E-36	up	yes	Potri.005G043100	protein_coding	chrChr05:3169000-3172812:-	gi|566169435|ref|XP_006382689.1|	2987	0	hypothetical protein POPTR_0005s04460g [Populus trichocarpa]	gi|566169434|ref|XM_006382627.1|	2187	0	Populus trichocarpa hypothetical protein (POPTR_0005s04460g) mRNA, complete cds	.	.	.	.	.	.	.	.	pfam10539	Dev_Cell_Death	Development and cell death domain. The DCD domain is found in plant proteins involved in development and cell death. The DCD domain is an approximately 130 amino acid long stretch that contains several mostly invariable motifs. These include a FGLP and a LFL motif at the N-terminus and a PAQV and a PLxE motif towards the C-terminus of the domain. The DCD domain is present in proteins with differe…	.	.	.	.	.
Potri.009G043900.v3.0	158	167	128	90.83869225	25	29	24	6.448205892	2.68889781	5.89E-30	4.64E-29	up	yes	Potri.009G043900	protein_coding	chrChr09:5021441-5023303:+	gi|566186325|ref|XP_002314116.2|	1819	0	zinc finger family protein [Populus trichocarpa]	gi|566186324|ref|XM_002314080.2|	1629	0	Populus trichocarpa zinc finger family protein (POPTR_0009s04850g) mRNA, complete cds	.	.	.	.	.	.	.	.	pfam13894	zf-C2H2_4	C2H2-type zinc finger. This family contains a number of divergent C2H2 type zinc fingers.	.	.	.	.	.
Potri.006G204700.v3.0	563	573	511	331.8172442	73	122	92	6.446931097	2.688612565	4.22E-90	1.09E-88	up	yes	Potri.006G204700	protein_coding	chrChr06:22026345-22028968:-	gi|224091907|ref|XP_002309394.1|	2195	0	aspartyl protease family protein [Populus trichocarpa]	gi|224091906|ref|XM_002309358.1|	1797	0	Populus trichocarpa aspartyl protease family protein (POPTR_0006s22110g) mRNA, complete cds	Q766C3	150	2.00E-37	Aspartic proteinase nepenthesin-1	.	.	.	.	pfam14541	TAXi_C	Xylanase inhibitor C-terminal. The N- and C-termini of the members of this family are jointly necessary for creating the catalytic pocket necessary for cleaving xylasnase. Phytopathogens produce xylanase that destroys plant cells, so its destruction through proteolysis is vital for plant-survival.	.	GO:0005576|extracellular region;	GO:0004190|aspartic-type endopeptidase activity;	.	.
Potri.008G132700.v3.0	1268	1291	1139	745.3983339	180	244	219	6.436558861	2.686289595	7.31E-179	5.47E-177	up	yes	Potri.008G132700	protein_coding	chrChr08:8784258-8788907:+	gi|224099525|ref|XP_002311518.1|	2493	0	endo-1 family protein [Populus trichocarpa]	gi|347466560|gb|HQ331258.1|	1817	0	Populus trichocarpa endo-1,4-beta-glucanase (GH9B6) mRNA, complete cds	Q9CAC1	808	0	Endoglucanase 8	.	.	.	.	pfam00759	Glyco_hydro_9	Glycosyl hydrolase family 9.	GO:0042547|cell wall modification involved in multidimensional cell growth;GO:0030245|cellulose catabolic process;	GO:0009507|chloroplast;GO:0005576|extracellular region;	GO:0008810|cellulase activity;	.	.
Potri.005G023500.v3.0	2610	2561	1923	1419.030455	353	447	428	6.410663195	2.680473614	4.26E-289	8.10E-287	up	yes	Potri.005G023500	protein_coding	chrChr05:1771476-1773298:-	gi|566168957|ref|XP_006382454.1|	895	5.00E-118	60S ribosomal protein L18 [Populus trichocarpa]	gi|566168956|ref|XM_006382392.1|	958	0	Populus trichocarpa 60S ribosomal protein L18 (POPTR_0005s02330g) mRNA, complete cds	P42791	322	1.00E-108	60S ribosomal protein L18-2	SPBC11C11.07	197	9.00E-61	COG1727	pfam00828	Ribosomal_L18e	Ribosomal protein L18e/L15. This family includes eukaryotic L18 as well as prokaryotic L15.	GO:0006412|translation;	GO:0009507|chloroplast;GO:0022625|cytosolic large ribosomal subunit;GO:0015934|large ribosomal subunit;GO:0005886|plasma membrane;GO:0005774|vacuolar membrane;GO:0005773|vacuole;	GO:0003723|RNA binding;GO:0003735|structural constituent of ribosome;	K02883	RP-L18e, RPL18; large subunit ribosomal protein L18e
Potri.017G098000.v3.0	89	122	95	61.90553296	21	16	16	6.383701259	2.674393139	2.20E-19	1.21E-18	up	yes	Potri.017G098000	protein_coding	chrChr17:11549125-11549980:-	gi|224141529|ref|XP_002324122.1|	291	4.00E-29	hypothetical protein POPTR_0017s13120g [Populus trichocarpa]	gi|118489588|gb|EF148634.1|	340	5.00E-177	Populus trichocarpa x Populus deltoides clone WS0135_G16 unknown mRNA	.	.	.	.	.	.	.	.	pfam09468	RNase_H2-Ydr279	Ydr279p protein family (RNase H2 complex component). RNases H are enzymes that specifically hydrolyse RNA when annealed to a complementary DNA and are present in all living organisms. In yeast RNase H2 is composed of a complex of three proteins (Rnh2Ap, Ydr279p and Ylr154p), this family represents the homologues of Ydr279p. It is not known whether non yeast proteins in this family fulfil the same…	.	.	.	.	.
Potri.018G057700.v3.0	175	152	118	89.23585221	24	20	34	6.305500348	2.656610854	5.61E-27	4.05E-26	up	yes	Potri.018G057700	protein_coding	chrChr18:6104474-6107817:-	gi|743922878|ref|XP_011005517.1|	1073	1.00E-163	PREDICTED: serine/threonine-protein kinase Aurora-2-like [Populus euphratica]	gi|566214260|ref|XM_002324124.2|	1148	0	Populus trichocarpa hypothetical protein (POPTR_0018s04830g) mRNA, complete cds	Q9M077	375	5.00E-147	Serine/threonine-protein kinase Aurora-1	.	.	.	.	pfam00069	Pkinase	Protein kinase domain.	GO:0051301|cell division;GO:0016572|histone phosphorylation;GO:0007067|mitotic nuclear division;GO:0007052|mitotic spindle organization;GO:0032465|regulation of cytokinesis;	GO:0009504|cell plate;GO:0032133|chromosome passenger complex;GO:0000780|condensed nuclear chromosome, centromeric region;GO:0005874|microtubule;GO:0031965|nuclear membrane;GO:0005730|nucleolus;GO:0005634|nucleus;GO:0009524|phragmoplast;GO:0005819|spindle;GO:0005876|spindle microtubule;GO:0051233|spindle midzone;GO:0000922|spindle pole;	GO:0005524|ATP binding;GO:0035175|histone kinase activity (H3-S10 specific);GO:0004674|protein serine/threonine kinase activity;	K08850	AURKX; aurora kinase, other [EC:2.7.11.1]
Potri.015G110400.v3.0	593	559	445	321.0604513	85	98	99	6.288580452	2.652734388	6.36E-91	1.66E-89	up	yes	Potri.015G110400	protein_coding	chrChr15:12679163-12683872:-	gi|566207199|ref|XP_002322315.2|	1343	0	hypothetical protein POPTR_0015s12190g [Populus trichocarpa]	gi|566207198|ref|XM_002322279.2|	1452	0	Populus trichocarpa hypothetical protein (POPTR_0015s12190g) mRNA, complete cds	Q9LU64	336	4.00E-110	Superoxide dismutase [Fe] 2, chloroplastic	alr2938	195	7.00E-58	COG0605	pfam02777	Sod_Fe_C	Iron/manganese superoxide dismutases, C-terminal domain. superoxide dismutases (SODs) catalyse the conversion of superoxide radicals to hydrogen peroxide and molecular oxygen. Three evolutionarily distinct families of SODs are known, of which the Mn/Fe-binding family is one. In humans, there is a cytoplasmic Cu/Zn SOD, and a mitochondrial Mn/Fe SOD. C-terminal domain is a mixed alpha/beta fold.	GO:0055114|oxidation-reduction process;GO:0009411|response to UV;	GO:0009507|chloroplast;GO:0042644|chloroplast nucleoid;GO:0009534|chloroplast thylakoid;GO:0009295|nucleoid;GO:0009579|thylakoid;	GO:0046872|metal ion binding;GO:0004784|superoxide dismutase activity;	K04564	SOD2; superoxide dismutase, Fe-Mn family [EC:1.15.1.1]
Potri.005G027500.v3.0	56	60	42	31.60419778	7	12	9	6.287419593	2.652468045	1.65E-11	6.28E-11	up	yes	Potri.005G027500	protein_coding	chrChr05:2013267-2015668:-	gi|566169057|ref|XP_006382503.1|	617	8.00E-79	hypothetical protein POPTR_0005s02760g [Populus trichocarpa]	gi|743882739|ref|XM_011038533.1|	527	0	PREDICTED: Populus euphratica uncharacterized LOC105134203 (LOC105134203), mRNA	.	.	.	.	.	.	.	.	pfam05090	VKG_Carbox	Vitamin K-dependent gamma-carboxylase. Using reduced vitamin K, oxygen, and carbon dioxide, gamma-glutamyl carboxylase post-translationally modifies certain glutamates by adding carbon dioxide to the gamma position of those amino acids. In vertebrates, the modification of glutamate residues of target proteins is facilitated by an interaction between a propeptide present on target proteins and the…	.	.	.	.	.
Potri.010G058200.v3.0	167	188	145	100.706672	26	38	25	6.264537989	2.647208115	1.01E-31	8.43E-31	up	yes	Potri.010G058200	protein_coding	chrChr10:8755633-8761671:+	gi|743896495|ref|XP_011041520.1|	3496	0	PREDICTED: probable inactive leucine-rich repeat receptor-like protein kinase At1g66830 [Populus euphratica]	gi|743896494|ref|XM_011043218.1|	2348	0	PREDICTED: Populus euphratica probable inactive leucine-rich repeat receptor-like protein kinase At1g66830 (LOC105137473), mRNA	Q9ZU46	550	0	Receptor protein kinase-like protein ZAR1	lin1934_1	80.9	2.00E-15	COG0515	pfam00069	Pkinase	Protein kinase domain.	GO:0046777|protein autophosphorylation;GO:0010070|zygote asymmetric cell division;GO:0010069|zygote asymmetric cytokinesis in embryo sac;	GO:0009507|chloroplast;GO:0009570|chloroplast stroma;GO:0016021|integral component of membrane;GO:0009505|plant-type cell wall;GO:0005886|plasma membrane;GO:0090406|pollen tube;	GO:0005524|ATP binding;GO:0016301|kinase activity;GO:0004674|protein serine/threonine kinase activity;	.	.
Potri.006G095000.v3.0	918	916	710	511.4077142	128	183	142	6.253966073	2.644771393	2.92E-134	1.40E-132	up	yes	Potri.006G095000	protein_coding	chrChr06:7237781-7239792:-	gi|224090883|ref|XP_002309109.1|	2225	0	hypothetical protein POPTR_0006s09610g [Populus trichocarpa]	gi|566175411|ref|XM_002309073.2|	1016	0	Populus trichocarpa hypothetical protein (POPTR_0006s09610g) mRNA, complete cds	P37392	836	0	Tubulin beta-1 chain	ECU03g0820i	687	0	COG5023	pfam03953	Tubulin_C	Tubulin C-terminal domain. This family includes the tubulin alpha, beta and gamma chains. Members of this family are involved in polymer formation. Tubulins are GTPases. FtsZ can polymerize into tubes, sheets, and rings in vitro and is ubiquitous in eubacteria and archaea. Tubulin is the major component of microtubules. (The FtsZ GTPases have been split into their won family).	GO:0007017|microtubule-based process;	GO:0005737|cytoplasm;GO:0005874|microtubule;	GO:0005525|GTP binding;GO:0003924|GTPase activity;GO:0005200|structural constituent of cytoskeleton;	.	.
Potri.018G052500.v3.0	104	103	80	57.59841554	8	17	27	6.202168045	2.632772616	4.84E-18	2.53E-17	up	yes	Potri.018G052500	protein_coding	chrChr18:5462916-5464525:+	gi|224142896|ref|XP_002324769.1|	1160	9.00E-154	hypothetical protein POPTR_0018s05260g [Populus trichocarpa]	gi|566214338|ref|XM_002324733.2|	1132	0	Populus trichocarpa hypothetical protein (POPTR_0018s05260g) mRNA, complete cds	.	.	.	.	.	.	.	.	pfam03168	LEA_2	Late embryogenesis abundant protein. Different types of LEA proteins are expressed at different stages of late embryogenesis in higher plant seed embryos and under conditions of dehydration stress. The function of these proteins is unknown. This family represents a group of LEA proteins that appear to be distinct from those in pfam02987. The family DUF1511, pfam07427, has now been merged into thi…	.	.	.	.	.
Potri.008G131100.v3.0	97	83	47	45.13600973	15	9	16	6.163122663	2.623661505	9.11E-14	3.90E-13	up	yes	Potri.008G131100	protein_coding	chrChr08:8627835-8629565:+	gi|224099501|ref|XP_002311508.1|	708	7.00E-91	putative major latex family protein [Populus trichocarpa]	gi|224099500|ref|XM_002311472.1|	839	0	Populus trichocarpa putative major latex family protein (POPTR_0008s13030g) mRNA, complete cds	Q9SSK5	107	1.00E-26	MLP-like protein 43	.	.	.	.	pfam00407	Bet_v_1	Pathogenesis-related protein Bet v I family. This family is named after Bet v 1, the major birch pollen allergen. This protein belongs to family 10 of plant pathogenesis-related proteins (PR-10), cytoplasmic proteins of 15-17 kd that are wide-spread among dicotyledonous plants. In recent years, a number of diverse plant proteins with low sequence similarity to Bet v 1 was identified. A classifica…	GO:0006952|defense response;GO:0009607|response to biotic stimulus;	GO:0009507|chloroplast;	.	.	.
Potri.018G005300.v3.0	308	297	257	174.6816608	48	46	62	6.14569754	2.619576767	3.86E-50	4.93E-49	up	yes	Potri.018G005300	protein_coding	chrChr18:391977-393695:-	gi|566214083|ref|XP_006371801.1|	1865	0	hypothetical protein POPTR_0018s03770g [Populus trichocarpa]	gi|566214082|ref|XM_006371739.1|	1254	0	Populus trichocarpa hypothetical protein (POPTR_0018s03770g) mRNA, complete cds	P10290	140	6.00E-42	Anthocyanin regulatory C1 protein	ECU11g1690	88.6	5.00E-19	COG5147	pfam00249	Myb_DNA-binding	Myb-like DNA-binding domain. This family contains the DNA binding domains from Myb proteins, as well as the SANT domain family.	GO:0006355|regulation of transcription, DNA-templated;GO:0006351|transcription, DNA-templated;	GO:0005634|nucleus;	GO:0003677|DNA binding;	K09422	MYBP; myb proto-oncogene protein, plant
Potri.003G044900.v3.0	219	264	228	144.5427515	36	54	40	6.137115725	2.617560788	3.75E-41	3.91E-40	up	yes	Potri.003G044900	protein_coding	chrChr03:5993480-6000594:+	gi|224070732|ref|XP_002303217.1|	5914	0	STICHEL family protein [Populus trichocarpa]	gi|743934723|ref|XM_011013407.1|	3797	0	PREDICTED: Populus euphratica protein STICHEL-like (LOC105116187), transcript variant X1, mRNA	O64728	1144	0	Protein STICHEL	alr4932	239	2.00E-65	COG2812	pfam13177	DNA_pol3_delta2	DNA polymerase III, delta subunit. DNA polymerase III, delta subunit (EC 2.7.7.7) is required for, along with delta' subunit, the assembly of the processivity factor beta(2) onto primed DNA in the DNA polymerase III holoenzyme-catalysed reaction. The delta subunit is also known as HolA.	GO:0006261|DNA-dependent DNA replication;GO:0010091|trichome branching;GO:0010026|trichome differentiation;	GO:0009360|DNA polymerase III complex;GO:0005663|DNA replication factor C complex;GO:0005634|nucleus;GO:0005886|plasma membrane;	GO:0005524|ATP binding;GO:0003677|DNA binding;GO:0003887|DNA-directed DNA polymerase activity;	.	.
Potri.019G045800.v3.0	180	205	142	105.7806291	21	38	37	6.131323104	2.616198433	1.18E-32	1.00E-31	up	yes	Potri.019G045800	protein_coding	chrChr19:5517739-5524246:+	gi|743941255|ref|XP_011015113.1|	1582	0	PREDICTED: probable S-sulfocysteine synthase, chloroplastic [Populus euphratica]	gi|743941254|ref|XM_011016811.1|	1326	0	PREDICTED: Populus euphratica probable S-sulfocysteine synthase, chloroplastic (LOC105118778), mRNA	O22682	440	3.00E-149	Probable S-sulfocysteine synthase, chloroplastic	all2521	278	6.00E-88	COG0031	pfam00291	PALP	Pyridoxal-phosphate dependent enzyme. Members of this family are all pyridoxal-phosphate dependent enzymes. This family includes: serine dehydratase EC:4.2.1.13 P20132, threonine dehydratase EC:4.2.1.16, tryptophan synthase beta chain EC:4.2.1.20, threonine synthase EC:4.2.99.2, cysteine synthase EC:4.2.99.8 P11096, cystathionine beta-synthase EC:4.2.1.22, 1-aminocyclopropane-1-carboxylate deamin…	GO:0008652|cellular amino acid biosynthetic process;GO:0006535|cysteine biosynthetic process from serine;GO:0015979|photosynthesis;GO:0009643|photosynthetic acclimation;GO:0010310|regulation of hydrogen peroxide metabolic process;GO:0090322|regulation of superoxide metabolic process;	GO:0009507|chloroplast;GO:0009543|chloroplast thylakoid lumen;GO:0031977|thylakoid lumen;	GO:0004124|cysteine synthase activity;GO:0030170|pyridoxal phosphate binding;GO:0016740|transferase activity;	K01738	cysK; cysteine synthase A [EC:2.5.1.47]
Potri.011G110500.v3.0	76	69	60	41.61546552	15	13	9	6.120434101	2.613633982	6.78E-14	2.93E-13	up	yes	Potri.011G110500	protein_coding	chrChr11:13533914-13535412:-	gi|566194901|ref|XP_002316857.2|	2105	0	curculin-like lectin family protein [Populus trichocarpa]	gi|160358407|gb|AC214468.1|	1499	0	Populus trichocarpa clone POP038-L21, complete sequence	Q39688	431	5.00E-146	Epidermis-specific secreted glycoprotein EP1	.	.	.	.	pfam01453	B_lectin	D-mannose binding lectin. These proteins include mannose-specific lectins from plants as well as bacteriocins from bacteria.	GO:0006833|water transport;	GO:0005576|extracellular region;	GO:0030246|carbohydrate binding;	.	.
Potri.017G020000.v3.0	138	133	104	75.69731778	21	20	27	6.113456937	2.611988402	3.41E-24	2.25E-23	up	yes	Potri.017G020000	protein_coding	chrChr17:1746677-1748953:+	gi|566211554|ref|XP_006372829.1|	539	2.00E-66	hypothetical protein POPTR_0017s05460g [Populus trichocarpa]	gi|566211553|ref|XM_006372767.1|	631	0	Populus trichocarpa hypothetical protein (POPTR_0017s05460g) mRNA, complete cds	O22860	104	9.00E-27	60S ribosomal protein L38	.	.	.	.	pfam01781	Ribosomal_L38e	Ribosomal L38e protein family.	GO:0022618|ribonucleoprotein complex assembly;GO:0006412|translation;	GO:0022625|cytosolic large ribosomal subunit;GO:0022626|cytosolic ribosome;	GO:0003723|RNA binding;GO:0003735|structural constituent of ribosome;	K02923	RP-L38e, RPL38; large subunit ribosomal protein L38e
Potri.001G009300.v3.0	60	66	40	33.26643167	10	8	12	6.078919036	2.603814804	1.74E-11	6.62E-11	up	yes	Potri.001G009300	protein_coding	chrChr01:605212-605886:-	gi|743886923|ref|XP_011037982.1|	509	2.00E-62	PREDICTED: uncharacterized protein LOC105135007 [Populus euphratica]	gi|743886922|ref|XM_011039680.1|	534	0	PREDICTED: Populus euphratica uncharacterized LOC105135007 (LOC105135007), mRNA	.	.	.	.	.	.	.	.	pfam11139	DUF2910	Protein of unknown function (DUF2910). Some members in this bacterial family annotate the proteins as cytochrome C biogenesis proteins however this cannot be confirmed. Currently no function for this family is known.	.	.	.	.	.
Potri.004G165300.v3.0	575	516	446	311.361309	84	102	96	6.069010645	2.601461351	1.07E-84	2.55E-83	up	yes	Potri.004G165300	protein_coding	chrChr04:18585424-18586392:-	gi|566167004|ref|XP_006384539.1|	500	5.00E-60	hypothetical protein POPTR_0004s17250g [Populus trichocarpa]	gi|159158043|gb|AC213921.1|	922	0	Populus trichocarpa clone POP006-K20, complete sequence	Q9FJG0	118	3.00E-31	Auxin-responsive protein SAUR20	.	.	.	.	pfam02519	Auxin_inducible	Auxin responsive protein. This family consists of the protein products of the ARG7 auxin responsive genes family none of which have any identified functional role.	GO:0009734|auxin-activated signaling pathway;GO:0007275|multicellular organismal development;GO:0040008|regulation of growth;	GO:0005886|plasma membrane;	.	K14488	SAUR; SAUR family protein
Potri.013G152500.v3.0	58	72	63	39.27239188	8	19	9	6.062782683	2.599980111	7.79E-13	3.18E-12	up	yes	Potri.013G152500	protein_coding	chrChr13:15600169-15600835:+	gi|566201387|ref|XP_006376545.1|	338	2.00E-37	hypothetical protein POPTR_0013s14870g [Populus trichocarpa]	gi|566201386|ref|XM_006376483.1|	324	4.00E-168	Populus trichocarpa hypothetical protein (POPTR_0013s14870g) mRNA, complete cds	.	.	.	.	.	.	.	.	pfam05804	KAP	Kinesin-associated protein (KAP). This family consists of several eukaryotic kinesin-associated (KAP) proteins. Kinesins are intracellular multimeric transport motor proteins that move cellular cargo on microtubule tracks. It has been shown that the sea urchin KRP85/95 holoenzyme associates with a KAP115 non-motor protein, forming a heterotrimeric complex in vitro, called the Kinesin-II.	.	.	.	.	.
Potri.017G009500.v3.0	61	59	45	33.37438425	11	7	12	6.057579273	2.59874138	1.69E-11	6.43E-11	up	yes	Potri.017G009500	protein_coding	chrChr17:804971-809233:+	gi|743915724|ref|XP_011001823.1|	3370	0	PREDICTED: probable receptor-like protein kinase At1g67000 isoform X1 [Populus euphratica]	gi|743915725|ref|XM_011003522.1|	1982	0	PREDICTED: Populus euphratica probable receptor-like protein kinase At5g39020 (LOC105108980), transcript variant X2, mRNA	P93604	357	8.00E-111	Rust resistance kinase Lr10	BH2504_1	88.6	4.00E-18	COG0515	pfam00069	Pkinase	Protein kinase domain.	.	GO:0016021|integral component of membrane;GO:0005886|plasma membrane;	GO:0005524|ATP binding;GO:0004674|protein serine/threonine kinase activity;	.	.
Potri.007G063300.v3.0	741	714	517	396.7379964	98	133	131	6.049567601	2.596832028	2.12E-103	6.59E-102	up	yes	Potri.007G063300	protein_coding	chrChr07:7874471-7876465:-	gi|566197083|ref|XP_006376791.1|	2338	0	hypothetical protein POPTR_0012s06430g [Populus trichocarpa]	gi|166157593|gb|AC216941.1|	1995	0	Populus trichocarpa clone POP023-N18, complete sequence	Q9SZF7	575	0	Protein SHORT-ROOT	.	.	.	.	pfam03514	GRAS	GRAS domain family. Proteins in the GRAS (GAI, RGA, SCR) family are known as major players in gibberellin (GA) signaling, which regulates various aspects of plant growth and development. Mutation of the SCARECROW (SCR) gene results in a radial pattern defect, loss of a ground tissue layer, in the root. The PAT1 protein is involved in phytochrome A signal transduction. A sequence, structure and ev…	GO:0008356|asymmetric cell division;GO:0055072|iron ion homeostasis;GO:0048366|leaf development;GO:0045930|negative regulation of mitotic cell cycle;GO:0009956|radial pattern formation;GO:0032350|regulation of hormone metabolic process;GO:0006351|transcription, DNA-templated;	GO:0005769|early endosome;GO:0005770|late endosome;GO:0005634|nucleus;GO:0055037|recycling endosome;	GO:0043565|sequence-specific DNA binding;GO:0003700|transcription factor activity, sequence-specific DNA binding;	.	.
Potri.004G142800.v3.0	251	255	219	147.0769825	32	56	47	6.027846695	2.591642726	5.34E-44	5.96E-43	up	yes	Potri.004G142800	protein_coding	chrChr04:16631093-16632331:+	gi|566166603|ref|XP_006384430.1|	1599	0	hypothetical protein POPTR_0004s15010g [Populus trichocarpa]	gi|157426997|gb|AC210654.1|	1239	0	Populus trichocarpa clone POP059-H12, complete sequence	Q9LMA7	234	7.00E-72	Probable carboxylesterase 1	MT1444	84	3.00E-17	COG0657	pfam07859	Abhydrolase_3	alpha/beta hydrolase fold. This catalytic domain is found in a very wide range of enzymes.	GO:0008152|metabolic process;	.	GO:0052689|carboxylic ester hydrolase activity;	.	.
Potri.012G007300.v3.0	76	83	50	41.7139321	6	18	15	5.996819968	2.584197662	1.38E-13	5.86E-13	up	yes	Potri.012G007300	protein_coding	chrChr12:601216-603304:-	gi|224118496|ref|XP_002317833.1|	1053	9.00E-138	copper-binding family protein [Populus trichocarpa]	gi|743900885|ref|XM_011045447.1|	928	0	PREDICTED: Populus euphratica uncharacterized LOC105139116 (LOC105139116), transcript variant X2, mRNA	Q9FLU5	251	5.00E-77	Heavy metal-associated isoprenylated plant protein 9	.	.	.	.	pfam00403	HMA	Heavy-metal-associated domain.	GO:0046916|cellular transition metal ion homeostasis;GO:0030001|metal ion transport;	GO:0005737|cytoplasm;	GO:0046914|transition metal ion binding;	.	.
Potri.012G016200.v3.0	1064	950	898	594.1682919	164	209	175	5.937426145	2.569837663	1.54E-126	6.71E-125	up	yes	Potri.012G016200	protein_coding	chrChr12:1564117-1567623:+	gi|224118286|ref|XP_002317781.1|	1861	0	calmodulin-binding family protein [Populus trichocarpa]	gi|743834702|ref|XM_011026546.1|	1848	0	PREDICTED: Populus euphratica protein IQ-DOMAIN 1 (LOC105125887), transcript variant X2, mRNA	.	.	.	.	.	.	.	.	pfam13178	DUF4005	Protein of unknown function (DUF4005). This is a C-terminal region of plant IQ-containing putative calmodulin-binding proteins.	.	.	.	.	.
Potri.011G042300.v3.0	243	244	209	141.8127808	41	49	41	5.919639856	2.565509407	3.81E-42	4.07E-41	up	yes	Potri.011G042300	protein_coding	chrChr11:3582097-3584383:-	gi|224114093|ref|XP_002316665.1|	2729	0	armadillo/beta-catenin repeat family protein [Populus trichocarpa]	gi|566193630|ref|XM_002316629.2|	2218	0	Populus trichocarpa armadillo/beta-catenin repeat family protein (POPTR_0011s04190g) mRNA, complete cds	.	.	.	.	.	.	.	.	pfam00514	Arm	Armadillo/beta-catenin-like repeat. Approx. 40 amino acid repeat. Tandem repeats form super-helix of helices that is proposed to mediate interaction of beta-catenin with its ligands. CAUTION: This family does not contain all known armadillo repeats.	.	.	.	.	.
Potri.001G054700.v3.0	140	147	144	88.46883487	20	30	33	5.851846474	2.54889192	3.88E-26	2.73E-25	up	yes	Potri.001G054700	protein_coding	chrChr01:4139980-4144352:-	gi|566148861|ref|XP_002299297.2|	2359	0	hypothetical protein POPTR_0001s14000g [Populus trichocarpa]	gi|743916343|ref|XM_011003842.1|	1604	0	PREDICTED: Populus euphratica CTD small phosphatase-like protein 2 (LOC105109220), transcript variant X3, mRNA	Q54GB2	212	2.00E-58	CTD small phosphatase-like protein 2	YLR019w	128	4.00E-31	COG5190	pfam03031	NIF	NLI interacting factor-like phosphatase. This family contains a number of NLI interacting factor isoforms and also an N-terminal regions of RNA polymerase II CTC phosphatase and FCP1 serine phosphatase. This region has been identified as the minimal phosphatase domain.	.	.	GO:0004721|phosphoprotein phosphatase activity;	K17616	CTDSPL2; CTD small phosphatase-like protein 2 [EC:3.1.3.-]
Potri.013G026700.v3.0	117	115	81	63.38087376	21	20	18	5.845423508	2.547307554	7.68E-20	4.31E-19	up	yes	Potri.013G026700	protein_coding	chrChr13:1762601-1768264:+	gi|566199067|ref|XP_002319031.2|	1531	0	hypothetical protein POPTR_0013s02770g [Populus trichocarpa]	gi|566199066|ref|XM_002318995.2|	1233	0	Populus trichocarpa hypothetical protein (POPTR_0013s02770g) mRNA, complete cds	Q9VCX3	58.9	4.00E-08	Probable 39S ribosomal protein L45, mitochondrial	.	.	.	.	pfam04280	Tim44	Tim44-like domain. Tim44 is an essential component of the machinery that mediates the translocation of nuclear-encoded proteins across the mitochondrial inner membrane. Tim44 is thought to bind phospholipids of the mitochondrial inner membrane both by electrostatic interactions and by penetrating the polar head group region. This family includes the C-terminal region of Tim44 that has been shown …	GO:0032543|mitochondrial translation;	GO:0005762|mitochondrial large ribosomal subunit;GO:0005739|mitochondrion;	GO:0003735|structural constituent of ribosome;	K17426	MRPL45; large subunit ribosomal protein L45
Potri.002G063100.v3.0	102	102	100	62.54921435	20	16	22	5.839498996	2.545844597	4.69E-19	2.55E-18	up	yes	Potri.002G063100	protein_coding	chrChr02:4240466-4241580:+	gi|224062840|ref|XP_002300897.1|	950	2.00E-126	hypothetical protein POPTR_0002s06370g [Populus trichocarpa]	gi|743899257|ref|XM_011044611.1|	846	0	PREDICTED: Populus euphratica uncharacterized LOC105138514 (LOC105138514), transcript variant X1, mRNA	.	.	.	.	.	.	.	.	pfam05227	CHASE3	CHASE3 domain. CHASE3 is an extracellular sensory domain, which is present in various classes of transmembrane receptors that are parts of signal transduction pathways in bacteria. Specifically, CHASE3 domains are found in histidine kinases, adenylate cyclases, methyl-accepting chemotaxis proteins and predicted diguanylate cyclases/phosphodiesterases. Environmental factors that are recognized by …	.	.	.	.	.
Potri.002G251600.v3.0	666	710	544	390.1181684	103	130	133	5.838883405	2.545692503	8.66E-105	2.76E-103	up	yes	Potri.002G251600	protein_coding	chrChr02:24119476-24125266:+	gi|224065468|ref|XP_002301825.1|	3518	0	hypothetical protein POPTR_0002s25290g [Populus trichocarpa]	gi|566159907|ref|XM_002301789.2|	2337	0	Populus trichocarpa hypothetical protein (POPTR_0002s25290g) mRNA, complete cds	O50064	1108	0	Fimbrin-2	SPBC1778.06c	424	1.00E-135	COG5069	pfam00307	CH	Calponin homology (CH) domain. The CH domain is found in both cytoskeletal proteins and signal transduction proteins. The CH domain is involved in actin binding in some members of the family. However in calponins there is evidence that the CH domain is not involved in its actin binding activity. Most member proteins have from two to four copies of the CH domain, however some proteins such as calp…	GO:0051764|actin crosslink formation;GO:0051017|actin filament bundle assembly;GO:0051639|actin filament network formation;	GO:0005884|actin filament;GO:0032432|actin filament bundle;GO:0005737|cytoplasm;	GO:0051015|actin filament binding;	.	.
Potri.010G089900.v3.0	145	150	90	77.38518429	20	24	29	5.820800437	2.541217556	4.87E-23	3.08E-22	up	yes	Potri.010G089900	protein_coding	chrChr10:11367693-11370059:+	gi|224108071|ref|XP_002314710.1|	790	3.00E-102	hypothetical protein POPTR_0010s10020g [Populus trichocarpa]	gi|224108070|ref|XM_002314674.1|	958	0	Populus trichocarpa hypothetical protein (POPTR_0010s10020g) mRNA, complete cds	P80728	124	2.00E-33	Mavicyanin	.	.	.	.	pfam02298	Cu_bind_like	Plastocyanin-like domain. This family represents a domain found in flowering plants related to the copper binding protein plastocyanin. Some members of this family may not bind copper due to the lack of key residues.	GO:0055114|oxidation-reduction process;	.	GO:0009055|electron carrier activity;GO:0046872|metal ion binding;	.	.
Potri.002G190800.v3.0	25	27	12	12.77837721	5	5	2	5.783839298	2.532027468	4.88E-05	0.000118299	up	yes	Potri.002G190800	protein_coding	chrChr02:15108812-15110488:+	gi|224068650|ref|XP_002302791.1|	462	7.00E-56	NPR1/NIM1-interacting protein 1 [Populus trichocarpa]	gi|566158858|ref|XM_002302755.2|	560	0	Populus trichocarpa NPR1/NIM1-interacting protein 1 (POPTR_0002s19140g) mRNA, complete cds	.	.	.	.	.	.	.	.	pfam08388	GIIM	Group II intron, maturase-specific domain. This region is found mainly in various bacterial and archaeal species, but a few members of this family are expressed by fungal and chlamydomonal species. It has been implicated in the binding of intron RNA during reverse transcription and splicing.	.	.	.	.	.
Potri.014G102600.v3.0	143	145	94	77.16632949	24	31	18	5.773837556	2.529530519	1.34E-22	8.32E-22	up	yes	Potri.014G102600	protein_coding	chrChr14:8028132-8031302:+	gi|224128003|ref|XP_002320217.1|	1241	5.00E-168	hypothetical protein POPTR_0014s09820g [Populus trichocarpa]	gi|566203462|ref|XM_002320181.2|	1190	0	Populus trichocarpa hypothetical protein (POPTR_0014s09820g) mRNA, complete cds	.	.	.	.	.	.	.	.	pfam06170	DUF983	Protein of unknown function (DUF983). This family consists of several bacterial proteins of unknown function.	.	.	.	.	.
Potri.008G044700.v3.0	458	432	435	272.5039352	67	96	96	5.758156106	2.525606901	1.30E-66	2.30E-65	up	yes	Potri.008G044700	protein_coding	chrChr08:2562269-2565584:-	gi|224100853|ref|XP_002312040.1|	1259	7.00E-170	RNA recognition motif-containing family protein [Populus trichocarpa]	gi|566182323|ref|XM_002312004.2|	1381	0	Populus trichocarpa RNA recognition motif-containing family protein (POPTR_0008s04430g) mRNA, complete cds	Q9M1S3	229	8.00E-70	Probable RNA-binding protein ARP1	.	.	.	.	pfam00076	RRM_1	RNA recognition motif. (a.k.a. RRM, RBD, or RNP domain). The RRM motif is probably diagnostic of an RNA binding protein. RRMs are found in a variety of RNA binding proteins, including various hnRNP proteins, proteins implicated in regulation of alternative splicing, and protein components of snRNPs. The motif also appears in a few single stranded DNA binding proteins. The RRM structure consists o…	GO:0010029|regulation of seed germination;GO:0009737|response to abscisic acid;GO:0009651|response to salt stress;GO:0009414|response to water deprivation;	GO:0005634|nucleus;	GO:0000166|nucleotide binding;GO:0003723|RNA binding;	.	.
Potri.015G093100.v3.0	897	895	673	500.5934055	126	181	170	5.755082621	2.52483664	7.40E-127	3.24E-125	up	yes	Potri.015G093100	protein_coding	chrChr15:11467926-11472771:+	gi|743831505|ref|XP_011024050.1|	2795	0	PREDICTED: probable inactive leucine-rich repeat receptor-like protein kinase At3g03770 [Populus euphratica]	gi|566206928|ref|XM_002321652.2|	2255	0	Populus trichocarpa hypothetical protein (POPTR_0015s10520g) mRNA, complete cds	Q8LFN2	380	1.00E-114	Probable inactive leucine-rich repeat receptor-like protein kinase At3g03770	alr0124_1	63.2	2.00E-09	COG4886	pfam07714	Pkinase_Tyr	Protein tyrosine kinase.	.	GO:0016021|integral component of membrane;GO:0005886|plasma membrane;	GO:0005524|ATP binding;GO:0004672|protein kinase activity;	.	.
Potri.014G094800.v3.0	891	826	597	468.7018267	123	169	155	5.743706099	2.521981929	1.57E-108	5.26E-107	up	yes	Potri.014G094800	protein_coding	chrChr14:7383986-7385290:-	gi|224130474|ref|XP_002320846.1|	139	4.00E-08	arabinogalactan-protein [Populus trichocarpa]	gi|566203331|ref|XM_002320810.2|	862	0	Populus trichocarpa arabinogalactan-protein (POPTR_0014s09050g) mRNA, complete cds	.	.	.	.	.	.	.	.	pfam00261	Tropomyosin	Tropomyosin.	.	.	.	.	.
Potri.015G054600.v3.0	608	742	559	389.1453172	91	151	131	5.733589258	2.519438557	2.76E-91	7.25E-90	up	yes	Potri.015G054600	protein_coding	chrChr15:7366296-7368674:+	gi|566206213|ref|XP_006374368.1|	2221	0	hypothetical protein POPTR_0015s06480g [Populus trichocarpa]	gi|566206212|ref|XM_006374306.1|	1965	0	Populus trichocarpa hypothetical protein (POPTR_0015s06480g) mRNA, complete cds	Q8RWD0	273	2.00E-82	Zinc finger protein CONSTANS-LIKE 16	.	.	.	.	pfam06203	CCT	CCT motif. This short motif is found in a number of plant proteins. It is rich in basic amino acids and has been called a CCT motif after Co, Col and Toc1. The CCT motif is about 45 amino acids long and contains a putative nuclear localisation signal within the second half of the CCT motif. Toc1 mutants have been identified in this region.	GO:0006355|regulation of transcription, DNA-templated;	GO:0016020|membrane;GO:0005634|nucleus;	GO:0003700|transcription factor activity, sequence-specific DNA binding;GO:0008270|zinc ion binding;	.	.
Potri.008G054600.v3.0	5770	6294	4977	3478.039231	886	1291	1153	5.723524002	2.516903695	0	0	up	yes	Potri.008G054600	protein_coding	chrChr08:3220568-3223132:-	gi|224100969|ref|XP_002312089.1|	3111	0	heat shock protein 70 cognate [Populus trichocarpa]	gi|566182503|ref|XM_002312053.2|	2224	0	Populus trichocarpa heat shock protein 70 cognate (POPTR_0008s05470g) mRNA, complete cds	P27322	1165	0	Heat shock cognate 70 kDa protein 2	.	.	.	.	pfam00012	HSP70	Hsp70 protein. Hsp70 chaperones help to fold many proteins. Hsp70 assisted folding involves repeated cycles of substrate binding and release. Hsp70 activity is ATP dependent. Hsp70 proteins are made up of two regions: the amino terminus is the ATPase domain and the carboxyl terminus is the substrate binding region.	.	.	GO:0005524|ATP binding;	.	.
Potri.009G149700.v3.0	3039	3161	2532	1783.02025	495	645	563	5.7100098	2.513493222	0	0	up	yes	Potri.009G149700	protein_coding	chrChr09:11782925-11788467:-	gi|224103023|ref|XP_002312893.1|	2051	0	glycosyl transferase family 2 family protein [Populus trichocarpa]	gi|566188105|ref|XM_002312857.2|	1723	0	Populus trichocarpa glycosyl transferase family 2 family protein (POPTR_0009s15190g) mRNA, complete cds	Q9FNI7	698	0	Glucomannan 4-beta-mannosyltransferase 2	aq_1407	82.4	3.00E-15	COG1215	pfam13632	Glyco_trans_2_3	Glycosyl transferase family group 2. Members of this family of prokaryotic proteins include putative glucosyltransferases, which are involved in bacterial capsule biosynthesis.	GO:0071555|cell wall organization;GO:0010192|mucilage biosynthetic process;GO:0048359|mucilage metabolic process involved in seed coat development;	GO:0005794|Golgi apparatus;GO:0000139|Golgi membrane;GO:0016021|integral component of membrane;	GO:0047259|glucomannan 4-beta-mannosyltransferase activity;GO:0051753|mannan synthase activity;	K13680	CSLA; beta-mannan synthase [EC:2.4.1.32]
Potri.002G078900.v3.0	467	511	315	261.2955805	68	77	106	5.687096483	2.50769228	7.80E-59	1.18E-57	up	yes	Potri.002G078900	protein_coding	chrChr02:5451767-5454839:+	gi|224063005|ref|XP_002300963.1|	1448	0	hypothetical protein POPTR_0002s07910g [Populus trichocarpa]	gi|566156825|ref|XM_002300927.2|	1644	0	Populus trichocarpa hypothetical protein (POPTR_0002s07910g) mRNA, complete cds	.	.	.	.	.	.	.	.	pfam09293	RNaseH_C	T4 RNase H, C terminal. Members of this family are found in T4 RNaseH ribonuclease, and adopt a SAM domain-like fold, consisting of a bundle of four/five helices. These residues may have a role in providing a docking site for other proteins or enzymes in the replication fork.	.	.	.	.	.
Potri.010G104200.v3.0	286	280	252	168.429667	54	51	57	5.614074766	2.489048277	2.61E-45	2.98E-44	up	yes	Potri.010G104200	protein_coding	chrChr10:12482986-12485306:+	gi|118486116|gb|ABK94901.1|	1119	3.00E-148	unknown [Populus trichocarpa]	gi|566190277|ref|XM_002314739.2|	620	0	Populus trichocarpa integral membrane family protein (POPTR_0010s11480g) mRNA, complete cds	Q9ZUA5	359	1.00E-119	Vacuolar iron transporter 1	YLR220w	112	1.00E-26	COG1814	pfam01988	VIT1	VIT family. This family includes the vacuolar Fe2+/Mn2+ uptake transporter, Ccc1 and the vacuolar iron transporter VIT1.	GO:0030026|cellular manganese ion homeostasis;GO:0071281|cellular response to iron ion;GO:0006880|intracellular sequestering of iron ion;GO:0055072|iron ion homeostasis;GO:0071421|manganese ion transmembrane transport;	GO:0016021|integral component of membrane;GO:0005774|vacuolar membrane;	GO:0005384|manganese ion transmembrane transporter activity;	.	.
Potri.006G253800.v3.0	70	71	63	41.84117309	7	12	22	5.608955718	2.487732193	8.99E-13	3.66E-12	up	yes	Potri.006G253800	protein_coding	chrChr06:25882663-25884432:-	gi|566178351|ref|XP_002309625.2|	866	5.00E-111	AP2 domain-containing transcription factor family protein [Populus trichocarpa]	gi|566178350|ref|XM_002309589.2|	869	0	Populus trichocarpa AP2 domain-containing transcription factor family protein (POPTR_0006s26990g) mRNA, complete cds	Q9LFN7	198	1.00E-58	Ethylene-responsive transcription factor SHINE 2	.	.	.	.	pfam00847	AP2	AP2 domain. This 60 amino acid residue domain can bind to DNA and is found in transcription factor proteins.	GO:0009873|ethylene-activated signaling pathway;GO:0006351|transcription, DNA-templated;	GO:0005634|nucleus;	GO:0003677|DNA binding;GO:0003700|transcription factor activity, sequence-specific DNA binding;	.	.
Potri.011G146300.v3.0	406	371	318	223.9614832	50	88	81	5.608290805	2.487561159	2.49E-59	3.80E-58	up	yes	Potri.011G146300	protein_coding	chrChr11:16600404-16605113:+	gi|566195562|ref|XP_002317030.2|	3874	0	hypothetical protein POPTR_0011s14930g [Populus trichocarpa]	gi|566195561|ref|XM_002316994.2|	2402	0	Populus trichocarpa hypothetical protein (POPTR_0011s14930g) mRNA, complete cds	Q8L7I2	546	3.00E-179	Subtilisin-like protease SBT3.6	BS_vpr	86.7	2.00E-16	COG1404	pfam00082	Peptidase_S8	Subtilase family. Subtilases are a family of serine proteases. They appear to have independently and convergently evolved an Asp/Ser/His catalytic triad, like that found in the trypsin serine proteases (see pfam00089). Structure is an alpha/beta fold containing a 7-stranded parallel beta sheet, order 2314567.	.	GO:0005576|extracellular region;	GO:0004252|serine-type endopeptidase activity;	.	.
Potri.012G032700.v3.0	1904	1778	1538	1070.835115	298	376	367	5.591720822	2.483292333	1.00E-209	1.04E-207	up	yes	Potri.012G032700	protein_coding	chrChr12:2895651-2897159:+	gi|566196211|ref|XP_002318367.2|	1820	0	hypothetical protein POPTR_0012s01280g [Populus trichocarpa]	gi|566196210|ref|XM_002318331.2|	1479	0	Populus trichocarpa hypothetical protein (POPTR_0012s01280g) mRNA, complete cds	P52838	314	2.00E-101	Flavonol sulfotransferase-like	.	.	.	.	pfam00685	Sulfotransfer_1	Sulfotransferase domain.	.	GO:0005737|cytoplasm;	GO:0008146|sulfotransferase activity;	.	.
Potri.005G021800.v3.0	61	54	27	28.41948974	7	12	9	5.582727863	2.480970232	3.74E-09	1.24E-08	up	yes	Potri.005G021800	protein_coding	chrChr05:1689388-1692797:+	gi|743883019|ref|XP_011036912.1|	755	1.00E-97	PREDICTED: uncharacterized protein LOC105134261 isoform X2 [Populus euphratica]	gi|743883018|ref|XM_011038610.1|	688	0	PREDICTED: Populus euphratica uncharacterized LOC105134261 (LOC105134261), transcript variant X2, mRNA	Q6NME7	143	1.00E-40	CST complex subunit TEN1	.	.	.	.	pfam15490	Ten1_2	Telomere-capping, CST complex subunit. Ten1_2 is a family of primarily plant and vertebrate telomere-capping proteins that is evolutionarily related to the mostly fungal family of Ten1, pfam12658.	GO:0048367|shoot system development;GO:0019827|stem cell population maintenance;GO:0000723|telomere maintenance;	GO:0000781|chromosome, telomeric region;	GO:0003697|single-stranded DNA binding;GO:0010521|telomerase inhibitor activity;	.	.
Potri.015G064300.v3.0	199	196	123	104.9545709	29	38	36	5.556456641	2.474165168	2.23E-29	1.74E-28	up	yes	Potri.015G064300	protein_coding	chrChr15:8860369-8862480:+	gi|566206463|ref|XP_006374488.1|	1939	0	hypothetical protein POPTR_0015s07560g [Populus trichocarpa]	gi|743907456|ref|XM_011048852.1|	1672	0	PREDICTED: Populus euphratica uncharacterized LOC105141591 (LOC105141591), mRNA	.	.	.	.	.	.	.	.	pfam03606	DcuC	C4-dicarboxylate anaerobic carrier.	.	.	.	.	.
Potri.016G031500.v3.0	730	690	539	400.1244334	95	155	145	5.541320787	2.470229887	1.42E-97	4.12E-96	up	yes	Potri.016G031500	protein_coding	chrChr16:1785751-1787085:+	gi|566208416|ref|XP_002322605.2|	1654	0	hypothetical protein POPTR_0016s03130g [Populus trichocarpa]	gi|566208415|ref|XM_002322569.2|	1238	0	Populus trichocarpa hypothetical protein (POPTR_0016s03130g) mRNA, complete cds	Q9SX25	160	4.00E-43	Probable carboxylesterase 6	Rv1399c	75.1	3.00E-14	COG0657	pfam07859	Abhydrolase_3	alpha/beta hydrolase fold. This catalytic domain is found in a very wide range of enzymes.	GO:0008152|metabolic process;	.	GO:0052689|carboxylic ester hydrolase activity;	.	.
Potri.006G062200.v3.0	341	315	251	186.064799	70	59	51	5.537380339	2.469203618	3.47E-44	3.88E-43	up	yes	Potri.006G062200	protein_coding	chrChr06:4563968-4567475:+	gi|566174754|ref|XP_006381083.1|	2745	0	hypothetical protein POPTR_0006s06100g [Populus trichocarpa]	gi|566174753|ref|XM_006381021.1|	2084	0	Populus trichocarpa hypothetical protein (POPTR_0006s06100g) mRNA, complete cds	Q9FZP1	726	0	Heparanase-like protein 3	.	.	.	.	pfam03662	Glyco_hydro_79n	Glycosyl hydrolase family 79, N-terminal domain. Family of endo-beta-N-glucuronidase, or heparanase. Heparan sulfate proteoglycans (HSPGs) play a key role in the self- assembly, insolubility and barrier properties of basement membranes and extracellular matrices. Hence, cleavage of heparan sulfate (HS) affects the integrity and functional state of tissues and thereby fundamental normal and pathol…	GO:0030198|extracellular matrix organization;GO:0030200|heparan sulfate proteoglycan catabolic process;	GO:0005576|extracellular region;GO:0005765|lysosomal membrane;GO:0009505|plant-type cell wall;	GO:0004566|beta-glucuronidase activity;GO:0043395|heparan sulfate proteoglycan binding;GO:0030305|heparanase activity;	.	.
Potri.002G097400.v3.0	479	489	385	276.8709212	65	116	93	5.529897295	2.467252686	5.61E-72	1.09E-70	up	yes	Potri.002G097400	protein_coding	chrChr02:7021468-7023491:+	gi|224063239|ref|XP_002301056.1|	1663	0	hydrolase family protein [Populus trichocarpa]	gi|566157166|ref|XM_002301020.2|	921	0	Populus trichocarpa hydrolase family protein (POPTR_0002s09760g) mRNA, complete cds	Q7MPY0	56.2	2.00E-07	Pimeloyl-[acyl-carrier protein] methyl ester esterase	.	.	.	.	pfam12697	Abhydrolase_6	Alpha/beta hydrolase family. This family contains alpha/beta hydrolase enzymes of diverse specificity.	GO:0009102|biotin biosynthetic process;	GO:0005737|cytoplasm;	GO:0052689|carboxylic ester hydrolase activity;	K02170	bioH; pimeloyl-[acyl-carrier protein] methyl ester esterase [EC:3.1.1.85]
Potri.011G064500.v3.0	753	823	585	441.6511502	124	164	148	5.504679898	2.460658672	4.50E-108	1.49E-106	up	yes	Potri.011G064500	protein_coding	chrChr11:5909061-5913009:+	gi|566194323|ref|XP_002317429.2|	2266	0	proline-rich family protein [Populus trichocarpa]	gi|743905031|ref|XM_011047603.1|	2102	0	PREDICTED: Populus euphratica protein CHUP1, chloroplastic (LOC105140684), mRNA	Q9LI74	309	3.00E-89	Protein CHUP1, chloroplastic	.	.	.	.	pfam15003	HAUS2	HAUS augmin-like complex subunit 2. This family of proteins is found in eukaryotes. Proteins in this family are typically between 203 and 291 amino acids in length. HAUS augmin-like complex subunit 2 is alternatively called centrosomal protein of 27 kDa (CEP27). It localized in the microtubule organizing centre, the centrosome. These microtubules are part of the cytoskeleton and give the cell its…	GO:0009902|chloroplast relocation;	GO:0009507|chloroplast;GO:0009707|chloroplast outer membrane;	.	.	.
Potri.005G024400.v3.0	1775	1772	1337	1000.283565	293	353	343	5.476647668	2.45329307	3.61E-202	3.44E-200	up	yes	Potri.005G024400	protein_coding	chrChr05:1818848-1820817:-	gi|566168983|ref|XP_006382467.1|	482	3.00E-57	hypothetical protein POPTR_0005s02430g [Populus trichocarpa]	gi|566168984|ref|XM_006382406.1|	663	0	Populus trichocarpa hypothetical protein (POPTR_0005s02430g) mRNA, complete cds	Q9M9W1	174	2.00E-52	60S ribosomal protein L22-2	.	.	.	.	pfam01776	Ribosomal_L22e	Ribosomal L22e protein family.	GO:0002181|cytoplasmic translation;	GO:0005829|cytosol;GO:0022625|cytosolic large ribosomal subunit;GO:0022626|cytosolic ribosome;GO:0005730|nucleolus;GO:0005886|plasma membrane;GO:0009506|plasmodesma;	GO:0003735|structural constituent of ribosome;	K02891	RP-L22e, RPL22; large subunit ribosomal protein L22e
Potri.019G038200.v3.0	478	466	381	272.1515759	74	98	98	5.472258651	2.452136422	8.03E-73	1.58E-71	up	yes	Potri.019G038200	protein_coding	chrChr19:4326953-4332125:-	gi|743929224|ref|XP_011008839.1|	4118	0	PREDICTED: 5-methyltetrahydropteroyltriglutamate--homocysteine methyltransferase 1 isoform X1 [Populus euphratica]	gi|566232464|ref|XM_006371117.1|	2972	0	Populus trichocarpa 5-methyltetrahydropteroyltriglutamate--homocysteine methyltransferase family protein (POPTR_0019s05430g) mRNA, complete cds	O50008	1456	0	5-methyltetrahydropteroyltriglutamate--homocysteine methyltransferase 1	XF2272	783	0	COG0620	pfam01717	Meth_synt_2	Cobalamin-independent synthase, Catalytic domain. This is a family of vitamin-B12 independent methionine synthases or 5-methyltetrahydropteroyltriglutamate--homocysteine methyltransferases, EC:2.1.1.14 from bacteria and plants. Plants are the only higher eukaryotes that have the required enzymes for methionine synthesis. This enzyme catalyses the last step in the production of methionine by trans…	GO:0050667|homocysteine metabolic process;GO:0046686|response to cadmium ion;GO:0009651|response to salt stress;GO:0010043|response to zinc ion;	GO:0048046|apoplast;GO:0009507|chloroplast;GO:0009570|chloroplast stroma;GO:0005829|cytosol;GO:0016020|membrane;GO:0005777|peroxisome;GO:0005886|plasma membrane;GO:0009506|plasmodesma;GO:0005774|vacuolar membrane;	GO:0003871|5-methyltetrahydropteroyltriglutamate-homocysteine S-methyltransferase activity;GO:0005507|copper ion binding;GO:0008705|methionine synthase activity;GO:0008270|zinc ion binding;	K00549	metE; 5-methyltetrahydropteroyltriglutamate--homocysteine methyltransferase [EC:2.1.1.14]
Potri.001G343100.v3.0	375	411	233	206.5909345	61	68	76	5.461253252	2.44923206	4.55E-47	5.43E-46	up	yes	Potri.001G343100	protein_coding	chrChr01:34830455-34839308:-	gi|743918222|ref|XP_011003114.1|	2446	0	PREDICTED: uncharacterized protein LOC105109943 [Populus euphratica]	gi|743918221|ref|XM_011004812.1|	1916	0	PREDICTED: Populus euphratica uncharacterized LOC105109943 (LOC105109943), transcript variant X1, mRNA	Q9RB36	188	3.00E-53	tRNA pseudouridine synthase B	Rv2793c	166	3.00E-45	COG0130	pfam01509	TruB_N	TruB family pseudouridylate synthase (N terminal domain). Members of this family are involved in modifying bases in RNA molecules. They carry out the conversion of uracil bases to pseudouridine. This family includes TruB, a pseudouridylate synthase that specifically converts uracil 55 to pseudouridine in most tRNAs. This family also includes Cbf5p that modifies rRNA.	GO:0031119|tRNA pseudouridine synthesis;	.	GO:0009982|pseudouridine synthase activity;GO:0003723|RNA binding;	K03177	truB, PUS4, TRUB1; tRNA pseudouridine55 synthase [EC:5.4.99.25]
Potri.001G301800.v3.0	378	331	286	204.3043538	48	75	81	5.46101915	2.449170216	1.23E-52	1.64E-51	up	yes	Potri.001G301800	protein_coding	chrChr01:30571640-30573953:-	gi|224056182|ref|XP_002298743.1|	1646	0	hypothetical protein POPTR_0001s30920g [Populus trichocarpa]	gi|566151930|ref|XM_002298707.2|	1551	0	Populus trichocarpa hypothetical protein (POPTR_0001s30920g) mRNA, complete cds	P42753	309	4.00E-97	Cyclin-D3-1	.	.	.	.	pfam00134	Cyclin_N	Cyclin, N-terminal domain. Cyclins regulate cyclin dependent kinases (CDKs). Human cyclin-O is a Uracil-DNA glycosylase that is related to other cyclins. Cyclins contain two domains of similar all-alpha fold, of which this family corresponds with the N-terminal domain.	GO:0051301|cell division;GO:0000082|G1/S transition of mitotic cell cycle;GO:0007067|mitotic nuclear division;GO:0009735|response to cytokinin;GO:0009744|response to sucrose;GO:0048316|seed development;	GO:0005634|nucleus;	.	K14505	CYCD3; cyclin D3, plant
Potri.005G026000.v3.0	1500	1452	1089	828.1620466	230	333	269	5.402401048	2.433600743	1.80E-164	1.17E-162	up	yes	Potri.005G026000	protein_coding	chrChr05:1904772-1910485:+	gi|224123084|ref|XP_002318991.1|	424	6.00E-50	hypothetical protein POPTR_0013s01830g [Populus trichocarpa]	gi|566169024|ref|XM_006382426.1|	515	0	Populus trichocarpa hypothetical protein (POPTR_0005s02610g) mRNA, complete cds	Q3E902	150	9.00E-45	40S ribosomal protein S21-2	.	.	.	.	pfam01249	Ribosomal_S21e	Ribosomal protein S21e.	GO:0000447|endonucleolytic cleavage in ITS1 to separate SSU-rRNA from 5.8S rRNA and LSU-rRNA from tricistronic rRNA transcript (SSU-rRNA, 5.8S rRNA, LSU-rRNA);GO:0000461|endonucleolytic cleavage to generate mature 3'-end of SSU-rRNA from (SSU-rRNA, 5.8S rRNA, LSU-rRNA);GO:0006412|translation;	GO:0022627|cytosolic small ribosomal subunit;	GO:0003735|structural constituent of ribosome;	K02971	RP-S21e, RPS21; small subunit ribosomal protein S21e
Potri.008G192100.v3.0	582	636	515	358.1624791	120	128	110	5.370459807	2.425045614	1.27E-81	2.88E-80	up	yes	Potri.008G192100	protein_coding	chrChr08:13351567-13355478:-	gi|566184914|ref|XP_002312697.2|	3086	0	hypothetical protein POPTR_0008s19640g [Populus trichocarpa]	gi|566184913|ref|XM_002312661.2|	2644	0	Populus trichocarpa hypothetical protein (POPTR_0008s19640g) mRNA, complete cds	Q9T041	167	2.00E-41	Microtubule-associated protein TORTIFOLIA1	.	.	.	.	pfam13513	HEAT_EZ	HEAT-like repeat. The HEAT repeat family is related to armadillo/beta-catenin-like repeats (see pfam00514). These EZ repeats are found in subunits of cyanobacterial phycocyanin lyase and other proteins and probably carry out a scaffolding role.	GO:0010031|circumnutation;GO:0007275|multicellular organismal development;GO:0009826|unidimensional cell growth;	GO:0010005|cortical microtubule, transverse to long axis;	GO:0008017|microtubule binding;	.	.
Potri.014G083900.v3.0	846	872	698	497.5896896	132	196	175	5.366319287	2.423932895	5.41E-121	2.15E-119	up	yes	Potri.014G083900	protein_coding	chrChr14:6616883-6621321:+	gi|224127668|ref|XP_002320131.1|	3487	0	basic helix-loop-helix regulatory family protein [Populus trichocarpa]	gi|566203175|ref|XM_002320095.2|	2329	0	Populus trichocarpa basic helix-loop-helix regulatory family protein (POPTR_0014s07960g) mRNA, complete cds	Q9FN69	479	3.00E-157	Transcription factor GLABRA 3	.	.	.	.	pfam14215	bHLH-MYC_N	bHLH-MYC and R2R3-MYB transcription factors N-terminal. This is the N-terminal region of a family of MYB and MYC transcription factors. The DNA-binding HLH domain is further downstream, pfam00010. Members of the MYB and MYC family regulate the biosynthesis of phenylpropanoids in several plant species (DOI:10.1007/s11295-009-0232-y).	GO:0001708|cell fate specification;GO:0009957|epidermal cell fate specification;GO:0007275|multicellular organismal development;GO:0006351|transcription, DNA-templated;GO:0010091|trichome branching;	GO:0005634|nucleus;	GO:0003677|DNA binding;GO:0003700|transcription factor activity, sequence-specific DNA binding;	.	.
Potri.013G103900.v3.0	127	126	130	80.0057221	27	27	26	5.352192962	2.42013013	4.87E-22	2.97E-21	up	yes	Potri.013G103900	protein_coding	chrChr13:11759259-11760975:+	gi|566256551|ref|XP_006388215.1|	1646	0	hypothetical protein POPTR_0279s00200g [Populus trichocarpa]	gi|566200420|ref|XM_006376070.1|	963	0	Populus trichocarpa hypothetical protein (POPTR_0013s10080g) mRNA, complete cds	Q15GI4	412	1.00E-141	Eugenol synthase 1	BH0305	49.3	7.00E-06	COG0702	pfam05368	NmrA	NmrA-like family. NmrA is a negative transcriptional regulator involved in the post-translational modification of the transcription factor AreA. NmrA is part of a system controlling nitrogen metabolite repression in fungi. This family only contains a few sequences as iteration results in significant matches to other Rossmann fold families.	GO:0009699|phenylpropanoid biosynthetic process;	.	GO:0016491|oxidoreductase activity;	K17055	EGS1; eugenol synthase [EC:1.1.1.318]
Potri.003G150000.v3.0	53	56	66	36.7427164	5	12	21	5.285273789	2.401978208	4.23E-10	1.48E-09	up	yes	Potri.003G150000	protein_coding	chrChr03:16430079-16432916:+	gi|566162723|ref|XP_006385819.1|	3889	0	hypothetical protein POPTR_0003s14970g [Populus trichocarpa]	gi|566162722|ref|XM_006385757.1|	2466	0	Populus trichocarpa hypothetical protein (POPTR_0003s14970g) mRNA, complete cds	C0LGP4	426	2.00E-131	Probable LRR receptor-like serine/threonine-protein kinase At3g47570	lin1934_1	103	8.00E-23	COG0515	pfam00069	Pkinase	Protein kinase domain.	.	GO:0016021|integral component of membrane;GO:0005886|plasma membrane;	GO:0005524|ATP binding;GO:0004674|protein serine/threonine kinase activity;	.	.
Potri.009G050700.v3.0	1592	1810	1312	971.1739999	264	404	331	5.2637352	2.396086914	2.59E-175	1.88E-173	up	yes	Potri.009G050700	protein_coding	chrChr09:5553194-5557424:-	gi|566186447|ref|XP_002313352.2|	3271	0	hypothetical protein POPTR_0009s05520g, partial [Populus trichocarpa]	gi|743864947|ref|XM_011033757.1|	3029	0	PREDICTED: Populus euphratica zinc finger CCCH domain-containing protein 53-like (LOC105131010), transcript variant X2, mRNA	Q10M00	373	5.00E-113	Zinc finger CCCH domain-containing protein 22	.	.	.	.	pfam14259	RRM_6	RNA recognition motif (a.k.a. RRM, RBD, or RNP domain).	.	.	GO:0003677|DNA binding;GO:0046872|metal ion binding;GO:0000166|nucleotide binding;GO:0003723|RNA binding;	.	.
Potri.006G110000.v3.0	702	709	589	414.726594	120	159	150	5.202654642	2.379247943	6.21E-101	1.86E-99	up	yes	Potri.006G110000	protein_coding	chrChr06:8580724-8584532:+	gi|224087891|ref|XP_002308259.1|	4426	0	kinase family protein [Populus trichocarpa]	gi|114158735|gb|AC182671.2|	3809	0	Populus trichocarpa clone Pop1-24F1, complete sequence	Q9SCZ4	1258	0	Receptor-like protein kinase FERONIA	BH2504_1	100	1.00E-21	COG0515	pfam12819	Malectin_like	Carbohydrate-binding protein of the ER. Malectin is a membrane-anchored protein of the endoplasmic reticulum that recognizes and binds Glc2-N-glycan. The domain is found on a number of plant receptor kinases.	GO:0009738|abscisic acid-activated signaling pathway;GO:0009742|brassinosteroid mediated signaling pathway;GO:0050832|defense response to fungus;GO:0009873|ethylene-activated signaling pathway;GO:0009788|negative regulation of abscisic acid-activated signaling pathway;GO:0030308|negative regulation of cell growth;GO:0010483|pollen tube reception;GO:0009791|post-embryonic development;GO:0046777|pr…	GO:0043680|filiform apparatus;GO:0016021|integral component of membrane;GO:0005622|intracellular;GO:0016020|membrane;GO:0005886|plasma membrane;GO:0009506|plasmodesma;	GO:0005524|ATP binding;GO:0004672|protein kinase activity;GO:0004674|protein serine/threonine kinase activity;	.	.
Potri.013G025700.v3.0	462	420	362	257.8472255	74	101	92	5.200191547	2.378564765	7.05E-65	1.20E-63	up	yes	Potri.013G025700	protein_coding	chrChr13:1673651-1676643:+	gi|224123230|ref|XP_002319027.1|	1888	0	hypothetical protein POPTR_0013s02660g [Populus trichocarpa]	gi|566199042|ref|XM_002318991.2|	1421	0	Populus trichocarpa hypothetical protein (POPTR_0013s02660g) mRNA, complete cds	Q0WRY5	271	1.00E-82	Serine/threonine-protein kinase CDL1	lin1934_1	97.8	3.00E-21	COG0515	pfam00069	Pkinase	Protein kinase domain.	GO:0009742|brassinosteroid mediated signaling pathway;GO:1900459|positive regulation of brassinosteroid mediated signaling pathway;	GO:0005886|plasma membrane;	GO:0005524|ATP binding;GO:0004674|protein serine/threonine kinase activity;	.	.
Potri.012G128700.v3.0	595	618	534	363.1572048	106	151	119	5.198350541	2.378053923	9.52E-85	2.27E-83	up	yes	Potri.012G128700	protein_coding	chrChr12:14605815-14609876:+	gi|566198481|ref|XP_002318874.2|	3354	0	hypothetical protein POPTR_0012s14430g [Populus trichocarpa]	gi|566198480|ref|XM_002318838.2|	2549	0	Populus trichocarpa hypothetical protein (POPTR_0012s14430g) mRNA, complete cds	Q8RY65	216	9.00E-59	Protein NSP-INTERACTING KINASE 2	.	.	.	.	pfam07714	Pkinase_Tyr	Protein tyrosine kinase.	GO:0006952|defense response;GO:0016032|viral process;	GO:0016021|integral component of membrane;GO:0005886|plasma membrane;	GO:0005524|ATP binding;GO:0004674|protein serine/threonine kinase activity;	.	.
Potri.014G128100.v3.0	36	33	29	20.35174481	6	6	9	5.197777959	2.377895005	5.04E-07	1.44E-06	up	yes	Potri.014G128100	protein_coding	chrChr14:9806921-9807506:-	gi|566203915|ref|XP_002320511.2|	556	4.00E-65	hypothetical protein POPTR_0014s12280g [Populus trichocarpa]	gi|566203914|ref|XM_002320475.2|	439	0	Populus trichocarpa hypothetical protein (POPTR_0014s12280g) mRNA, complete cds	.	.	.	.	.	.	.	.	pfam10876	DUF2669	Protein of unknown function (DUF2669). This family of proteins has no known function.	.	.	.	.	.
Potri.010G249600.v3.0	353	371	330	218.975358	43	114	74	5.188444739	2.375302149	1.68E-43	1.85E-42	up	yes	Potri.010G249600	protein_coding	chrChr10:22239667-22243625:+	gi|224113315|ref|XP_002316453.1|	1762	0	hypothetical protein POPTR_0010s25600g [Populus trichocarpa]	gi|566192745|ref|XM_002316417.2|	1166	0	Populus trichocarpa hypothetical protein (POPTR_0010s25600g) mRNA, complete cds	O04130	498	2.00E-164	D-3-phosphoglycerate dehydrogenase 2, chloroplastic	MA0592	289	3.00E-86	COG0111	pfam00389	2-Hacid_dh	D-isomer specific 2-hydroxyacid dehydrogenase, catalytic domain. This family represents the largest portion of the catalytic domain of 2-hydroxyacid dehydrogenases as the NAD binding domain is inserted within the structural domain.	GO:0006564|L-serine biosynthetic process;	GO:0009507|chloroplast;	GO:0016597|amino acid binding;GO:0051287|NAD binding;GO:0004617|phosphoglycerate dehydrogenase activity;	K00058	serA, PHGDH; D-3-phosphoglycerate dehydrogenase [EC:1.1.1.95]
Potri.008G070000.v3.0	222	207	164	122.6253971	39	52	36	5.1883246	2.375268743	1.03E-32	8.75E-32	up	yes	Potri.008G070000	protein_coding	chrChr08:4304282-4306524:+	gi|566182754|ref|XP_002311232.2|	2333	0	hypothetical protein POPTR_0008s07000g [Populus trichocarpa]	gi|566182753|ref|XM_002311196.2|	1613	0	Populus trichocarpa hypothetical protein (POPTR_0008s07000g) mRNA, complete cds	Q9LY46	531	0	Protein ESKIMO 1	.	.	.	.	pfam13839	PC-Esterase	GDSL/SGNH-like Acyl-Esterase family found in Pmr5 and Cas1p. The PC-Esterase family is comprised of Cas1p, the Homo sapiens C7orf58, Arabidopsis thaliana PMR5 and a group of plant freezing resistance/coldacclimatization proteins typified by Arabidopsis thaliana ESKIMO1. animal FAM55D proteins, and animal FAM113 proteins. The PC-Esterase family has features that are both similar and different from…	GO:0045893|positive regulation of transcription, DNA-templated;GO:0009409|response to cold;GO:0050826|response to freezing;GO:0045492|xylan biosynthetic process;	GO:0005794|Golgi apparatus;GO:0000139|Golgi membrane;GO:0016021|integral component of membrane;	GO:0016413|O-acetyltransferase activity;GO:1990538|xylan O-acetyltransferase activity;	.	.
Potri.008G185500.v3.0	33	30	12	15.06132922	3	7	6	5.16420241	2.368545548	3.01E-05	7.42E-05	up	yes	Potri.008G185500	protein_coding	chrChr08:12725596-12728312:+	gi|566184798|ref|XP_002311760.2|	2094	0	GDSL-motif lipase/hydrolase family protein [Populus trichocarpa]	gi|566184797|ref|XM_002311724.2|	1394	0	Populus trichocarpa GDSL-motif lipase/hydrolase family protein (POPTR_0008s18950g) mRNA, complete cds	Q9LIN2	535	0	GDSL esterase/lipase At3g26430	all3634	67	3.00E-11	COG3240	pfam00657	Lipase_GDSL	GDSL-like Lipase/Acylhydrolase.	GO:0016042|lipid catabolic process;	GO:0005576|extracellular region;	GO:0016298|lipase activity;	.	.
Potri.011G122200.v3.0	146	155	101	82.40021893	13	37	38	5.131998078	2.35952063	8.21E-21	4.79E-20	up	yes	Potri.011G122200	protein_coding	chrChr11:14730490-14735837:-	gi|224117214|ref|XP_002317510.1|	1609	0	hypothetical protein POPTR_0011s12280g [Populus trichocarpa]	gi|743853165|ref|XM_011031141.1|	1360	0	PREDICTED: Populus euphratica ribosome biogenesis protein BRX1-like (LOC105129185), mRNA	Q4QQT6	260	5.00E-78	Ribosome biogenesis protein BRX1 homolog	YOL077c	246	4.00E-74	COG5154	pfam04427	Brix	Brix domain.	GO:0000027|ribosomal large subunit assembly;	GO:0005730|nucleolus;	GO:0003723|RNA binding;	K14820	BRX1, BRIX1; ribosome biogenesis protein BRX1
Potri.018G089200.v3.0	299	216	204	149.3652518	38	65	56	5.069150106	2.341743885	3.90E-34	3.44E-33	up	yes	Potri.018G089200	protein_coding	chrChr18:11697912-11699851:-	gi|566258144|ref|XP_006388671.1|	1858	0	hypothetical protein POPTR_0124s00210g [Populus trichocarpa]	gi|566258143|ref|XM_006388609.1|	1350	0	Populus trichocarpa hypothetical protein (POPTR_0124s00210g) mRNA, complete cds	Q9FK75	277	6.00E-87	GDSL esterase/lipase At5g45670	.	.	.	.	pfam00657	Lipase_GDSL	GDSL-like Lipase/Acylhydrolase.	GO:0016042|lipid catabolic process;	GO:0005576|extracellular region;	GO:0016788|hydrolase activity, acting on ester bonds;	.	.
Potri.005G044100.v3.0	86	84	59	47.38618467	16	16	18	5.057178883	2.338332811	5.78E-14	2.50E-13	up	yes	Potri.005G044100	protein_coding	chrChr05:3249061-3252868:-	gi|743866793|ref|XP_011032563.1|	3172	0	PREDICTED: early endosome antigen 1-like [Populus euphratica]	gi|566169456|ref|XM_006382637.1|	2037	0	Populus trichocarpa hypothetical protein (POPTR_0005s045601g) mRNA, partial cds	Q5XV31	116	5.00E-25	FRIGIDA-like protein 5	.	.	.	.	pfam07899	Frigida	Frigida-like protein. This family is composed of plant proteins that are similar to FRIGIDA protein expressed by Arabidopsis thaliana. This protein is probably nuclear and is required for the regulation of flowering time in the late-flowering phenotype. It is known to increase RNA levels of flowering locus C. Allelic variation at the FRIGIDA locus is a major determinant of natural variation in fl…	GO:0030154|cell differentiation;GO:0009908|flower development;	.	.	.	.
Potri.002G234600.v3.0	874	869	659	498.588159	160	182	185	5.051895167	2.336824702	9.04E-110	3.10E-108	up	yes	Potri.002G234600	protein_coding	chrChr02:22826890-22828706:+	gi|566159624|ref|XP_002301740.2|	909	4.00E-118	hypothetical protein POPTR_0002s23560g [Populus trichocarpa]	gi|566159623|ref|XM_002301704.2|	735	0	Populus trichocarpa hypothetical protein (POPTR_0002s23560g) mRNA, complete cds	Q9SFC6	197	2.00E-58	Rho GDP-dissociation inhibitor 1	.	.	.	.	pfam02115	Rho_GDI	RHO protein GDP dissociation inhibitor.	GO:0009932|cell tip growth;GO:0010053|root epidermal cell differentiation;	GO:0005737|cytoplasm;	GO:0005096|GTPase activator activity;GO:0005094|Rho GDP-dissociation inhibitor activity;	K12462	ARHGDI, RHOGDI; Rho GDP-dissociation inhibitor
Potri.018G127100.v3.0	64	68	45	36.5054752	10	17	12	5.047762694	2.335644088	3.75E-11	1.40E-10	up	yes	Potri.018G127100	protein_coding	chrChr18:14930455-14931868:+	gi|224142583|ref|XP_002324635.1|	849	1.00E-110	calcium-binding family protein [Populus trichocarpa]	gi|743806073|ref|XM_011019524.1|	808	0	PREDICTED: Populus euphratica calmodulin-like protein 3 (LOC105121041), mRNA	Q9SRR7	132	1.00E-35	Calmodulin-like protein 3	SPAC3A12.14	85.1	4.00E-19	COG5126	pfam13499	EF-hand_7	EF-hand domain pair.	.	GO:0005777|peroxisome;	GO:0005509|calcium ion binding;	K13448	CML; calcium-binding protein CML
Potri.006G188300.v3.0	818	507	540	389.0020699	120	137	154	5.044573566	2.334732319	5.26E-23	3.32E-22	up	yes	Potri.006G188300	protein_coding	chrChr06:20309811-20311939:+	gi|224091669|ref|XP_002309324.1|	1582	0	class V chitinase family protein [Populus trichocarpa]	gi|566177227|ref|XM_002309288.2|	1322	0	Populus trichocarpa class V chitinase family protein (POPTR_0006s20260g) mRNA, complete cds	Q13231	142	4.00E-35	Chitotriosidase-1	BH0916_1	85.9	6.00E-17	COG3325	pfam00704	Glyco_hydro_18	Glycosyl hydrolases family 18.	GO:0005975|carbohydrate metabolic process;GO:0006032|chitin catabolic process;GO:0006955|immune response;GO:0000272|polysaccharide catabolic process;GO:0009617|response to bacterium;	GO:0005576|extracellular region;GO:0005615|extracellular space;GO:0005764|lysosome;	GO:0008061|chitin binding;GO:0004568|chitinase activity;GO:0008843|endochitinase activity;GO:0004553|hydrolase activity, hydrolyzing O-glycosyl compounds;	K01183	E3.2.1.14; chitinase [EC:3.2.1.14]
Potri.002G120700.v3.0	12786	13246	10801	7673.947473	2144	3303	2756	5.036583322	2.332445381	0	0	up	yes	Potri.002G120700	protein_coding	chrChr02:9046284-9048035:-	gi|566157595|ref|XP_002302422.2|	2076	0	hypothetical protein POPTR_0002s12170g [Populus trichocarpa]	gi|566157594|ref|XM_002302386.2|	1576	0	Populus trichocarpa hypothetical protein (POPTR_0002s12170g) mRNA, complete cds	Q9STX2	569	0	3-oxo-Delta(4,5)-steroid 5-beta-reductase	.	.	.	.	pfam01370	Epimerase	NAD dependent epimerase/dehydratase family. This family of proteins utilize NAD as a cofactor. The proteins in this family use nucleotide-sugar substrates for a variety of chemical reactions.	GO:0009611|response to wounding;GO:0008202|steroid metabolic process;GO:0010051|xylem and phloem pattern formation;	GO:0005829|cytosol;	GO:0047787|delta4-3-oxosteroid 5beta-reductase activity;GO:0035671|enone reductase activity;	.	.
Potri.017G130800.v3.0	516	606	418	318.6909583	75	161	108	5.025569876	2.3292872	4.27E-60	6.61E-59	up	yes	Potri.017G130800	protein_coding	chrChr17:14157953-14160405:-	gi|566210971|ref|XP_006372559.1|	1239	6.00E-165	hypothetical protein POPTR_0017s02800g [Populus trichocarpa]	gi|566210970|ref|XM_006372497.1|	1458	0	Populus trichocarpa hypothetical protein (POPTR_0017s02800g) mRNA, complete cds	Q0WPN8	314	1.00E-100	Cysteine-rich repeat secretory protein 60	.	.	.	.	pfam01657	Stress-antifung	Salt stress response/antifungal. This domain is often found in association with the kinase domains pfam00069 or pfam07714. In many proteins it is duplicated. It contains six conserved cysteines which are involved in disulphide bridges. It has a role in salt stress response and has antifungal activity.	GO:0006810|transport;GO:0016032|viral process;	GO:0016021|integral component of membrane;GO:0009506|plasmodesma;	.	.	.
Potri.002G250800.v3.0	219	261	166	133.6080461	38	57	49	4.981980205	2.316719289	9.83E-34	8.60E-33	up	yes	Potri.002G250800	protein_coding	chrChr02:24082593-24084827:-	gi|743833551|ref|XP_011024559.1|	642	1.00E-78	PREDICTED: uncharacterized protein LOC105125693 [Populus euphratica]	gi|566159893|ref|XM_002303046.2|	1158	0	Populus trichocarpa hypothetical protein (POPTR_0002s25220g) mRNA, complete cds	.	.	.	.	.	.	.	.	pfam00131	Metallothio	Metallothionein.	.	.	.	.	.
Potri.008G012400.v3.0	231	179	144	114.7246137	26	54	45	4.964528881	2.311656817	4.23E-27	3.07E-26	up	yes	Potri.008G012400	protein_coding	chrChr08:685882-690857:-	gi|743868305|ref|XP_011032963.1|	1968	0	PREDICTED: fasciclin-like arabinogalactan protein 17 [Populus euphratica]	gi|743868304|ref|XM_011034661.1|	1909	0	PREDICTED: Populus euphratica fasciclin-like arabinogalactan protein 17 (LOC105131618), mRNA	Q66GR0	578	0	Fasciclin-like arabinogalactan protein 17	.	.	.	.	pfam02469	Fasciclin	Fasciclin domain. This extracellular domain is found repeated four times in grasshopper fasciclin I as well as in proteins from mammals, sea urchins, plants, yeast and bacteria.	.	GO:0005576|extracellular region;GO:0005773|vacuole;	.	.	.
Potri.005G060700.v3.0	121	85	72	57.8020298	19	17	26	4.952779056	2.308238264	6.13E-15	2.79E-14	up	yes	Potri.005G060700	protein_coding	chrChr05:4256402-4257340:-	gi|224083416|ref|XP_002307017.1|	439	6.00E-49	hydroxyproline-rich glycoprotein [Populus trichocarpa]	gi|566169786|ref|XM_002306981.2|	939	0	Populus trichocarpa hydroxyproline-rich glycoprotein (POPTR_0005s06200g) mRNA, complete cds	.	.	.	.	.	.	.	.	pfam10189	DUF2356	Conserved protein (DUF2356). This is a 200 amino acid region of a family of proteins conserved from plants to humans. Some members have been putatively annotated as being integrator complex subunit 3 but this could not be confirmed. The function is unknown.	.	.	.	.	.
Potri.003G216200.v3.0	137	132	123	82.53103401	32	31	25	4.947490767	2.306697015	1.66E-21	9.96E-21	up	yes	Potri.003G216200	protein_coding	chrChr03:21302070-21303329:-	gi|566163928|ref|XP_006386060.1|	1025	2.00E-136	disease resistance-responsive family protein [Populus trichocarpa]	gi|566163927|ref|XM_006385998.1|	894	0	Populus trichocarpa disease resistance-responsive family protein (POPTR_0003s21470g) mRNA, complete cds	Q9C891	239	2.00E-75	Dirigent protein 20	.	.	.	.	pfam03018	Dirigent	Dirigent-like protein. This family contains a number of proteins which are induced during disease response in plants. Members of this family are involved in lignification.	GO:0009699|phenylpropanoid biosynthetic process;	GO:0048046|apoplast;	GO:0042349|guiding stereospecific synthesis activity;	.	.
Potri.017G096300.v3.0	197	287	169	135.6165615	47	53	47	4.896664963	2.291799488	7.26E-30	5.71E-29	up	yes	Potri.017G096300	protein_coding	chrChr17:11372146-11373004:+	gi|566213080|ref|XP_006373368.1|	642	4.00E-82	hypothetical protein POPTR_0017s13140g [Populus trichocarpa]	gi|566213079|ref|XM_006373306.1|	695	0	Populus trichocarpa hypothetical protein (POPTR_0017s13140g) mRNA, complete cds	.	.	.	.	.	.	.	.	pfam14214	Helitron_like_N	Helitron helicase-like domain at N-terminus. This family is found in Helitrons, recently recognized eukaryotic transposons that are predicted to amplify by a rolling-circle mechanism. In many instances a protein-coding gene is disrupted by their insertion.	.	.	.	.	.
Potri.006G044400.v3.0	266	259	177	145.6931082	46	64	49	4.891191691	2.290186007	9.01E-36	8.23E-35	up	yes	Potri.006G044400	protein_coding	chrChr06:3162131-3163068:-	gi|743844820|ref|XP_011027306.1|	406	3.00E-47	PREDICTED: protein GAST1-like [Populus euphratica]	gi|743844819|ref|XM_011029004.1|	531	0	PREDICTED: Populus euphratica protein GAST1-like (LOC105127637), mRNA	P27057	129	2.00E-36	Protein GAST1	.	.	.	.	pfam02704	GASA	Gibberellin regulated protein. This is the GASA gibberellin regulated cysteine rich protein family. The expression of these proteins is up-regulated by the plant hormone gibberellin, most of these proteins have some role in plant development. There are 12 cysteine residues conserved within the alignment giving the potential for these proteins to posses 6 disulphide bonds.	.	GO:0005576|extracellular region;	.	.	.
Potri.010G138400.v3.0	493	538	429	305.3345779	78	132	125	4.8880568	2.28926105	1.52E-69	2.83E-68	up	yes	Potri.010G138400	protein_coding	chrChr10:15104792-15109278:+	gi|743798017|ref|XP_011009569.1|	1697	0	PREDICTED: cytosolic sulfotransferase 5-like [Populus euphratica]	gi|743798018|ref|XM_011011274.1|	894	0	PREDICTED: Populus euphratica cytosolic sulfotransferase 5-like (LOC105114647), transcript variant X2, mRNA	Q9M1V2	337	6.00E-112	Cytosolic sulfotransferase 5	.	.	.	.	pfam00685	Sulfotransfer_1	Sulfotransferase domain.	GO:0009812|flavonoid metabolic process;	GO:0005737|cytoplasm;	GO:1990135|flavonoid sulfotransferase activity;GO:0008146|sulfotransferase activity;	.	.
Potri.011G025500.v3.0	83	69	47	41.09540664	9	26	11	4.847954311	2.277376102	9.43E-11	3.44E-10	up	yes	Potri.011G025500	protein_coding	chrChr11:2114262-2114977:-	gi|566192933|ref|XP_002317209.2|	773	3.00E-102	hypothetical protein POPTR_0011s00470g [Populus trichocarpa]	gi|743913566|ref|XM_011002394.1|	544	0	PREDICTED: Populus euphratica nuclear transport factor 2 (LOC105108190), mRNA	Q9C7F5	162	7.00E-49	Nuclear transport factor 2	.	.	.	.	pfam02136	NTF2	Nuclear transport factor 2 (NTF2) domain. This family includes the NTF2-like Delta-5-3-ketosteroid isomerase proteins.	GO:0015031|protein transport;	GO:0005737|cytoplasm;	.	.	.
Potri.001G415600.v3.0	198	232	219	137.3340149	39	60	52	4.844745186	2.276420788	6.67E-32	5.56E-31	up	yes	Potri.001G415600	protein_coding	chrChr01:44052569-44055219:-	gi|566154756|ref|XP_006370600.1|	1819	0	hypothetical protein POPTR_0001s44130g [Populus trichocarpa]	gi|566154755|ref|XM_006370538.1|	1150	0	Populus trichocarpa hypothetical protein (POPTR_0001s44130g) mRNA, complete cds	.	.	.	.	.	.	.	.	pfam13182	DUF4007	Protein of unknown function (DUF4007). This family of proteins is functionally uncharacterized. This family of proteins is found in bacteria and archaea. Proteins in this family are typically between 284 and 326 amino acids in length. This domain is found associated with pfam01507 in some proteins, suggesting a functional link.	.	.	.	.	.
Potri.018G101800.v3.0	122	128	123	78.73122336	20	39	28	4.844728789	2.276415905	2.97E-20	1.70E-19	up	yes	Potri.018G101800	protein_coding	chrChr18:12923882-12925734:-	gi|566215256|ref|XP_002325109.2|	856	2.00E-109	hypothetical protein POPTR_0018s11070g [Populus trichocarpa]	gi|566215255|ref|XM_002325073.2|	842	0	Populus trichocarpa hypothetical protein (POPTR_0018s11070g) mRNA, complete cds	.	.	.	.	.	.	.	.	pfam04784	DUF547	Protein of unknown function, DUF547. Family of uncharacterized proteins from C. elegans and A. thaliana.	.	.	.	.	.
Potri.001G052300.v3.0	2988	3319	2575	1862.234394	532	761	769	4.816675849	2.268037837	8.81E-244	1.20E-241	up	yes	Potri.001G052300	protein_coding	chrChr01:3989909-3995293:+	gi|224053451|ref|XP_002297822.1|	2345	0	pectate lyase family protein [Populus trichocarpa]	gi|566148904|ref|XM_002297786.2|	2061	0	Populus trichocarpa pectate lyase family protein (POPTR_0001s14240g) mRNA, complete cds	Q944R1	697	0	Probable pectate lyase 15	TM0433	81.6	9.00E-16	COG3866	pfam00544	Pec_lyase_C	Pectate lyase. This enzyme forms a right handed beta helix structure. Pectate lyase is an enzyme involved in the maceration and soft rotting of plant tissue.	GO:0045490|pectin catabolic process;	.	GO:0046872|metal ion binding;GO:0030570|pectate lyase activity;	K01728	pel; pectate lyase [EC:4.2.2.2]
Potri.006G052600.v3.0	517	611	444	329.2187981	82	176	114	4.755461371	2.249585317	5.43E-57	7.92E-56	up	yes	Potri.006G052600	protein_coding	chrChr06:3768788-3776411:-	gi|224090220|ref|XP_002308955.1|	5485	0	cellulose synthase family protein [Populus trichocarpa]	gi|566174558|ref|XM_002308919.2|	3422	0	Populus trichocarpa cellulose synthase family protein (POPTR_0006s05110g) mRNA, complete cds	Q941L0	1747	0	Cellulose synthase A catalytic subunit 3 [UDP-forming]	alr3757	95.1	6.00E-19	COG1215	pfam03552	Cellulose_synt	Cellulose synthase. Cellulose, an aggregate of unbranched polymers of beta-1,4-linked glucose residues, is the major component of wood and thus paper, and is synthesized by plants, most algae, some bacteria and fungi, and even some animals. The genes that synthesize cellulose in higher plants differ greatly from the well-characterized genes found in Acetobacter and Agrobacterium sp. More correctl…	GO:0071555|cell wall organization;GO:0030244|cellulose biosynthetic process;GO:0006952|defense response;GO:0009833|plant-type primary cell wall biogenesis;GO:0009834|plant-type secondary cell wall biogenesis;	GO:0005768|endosome;GO:0005794|Golgi apparatus;GO:0016021|integral component of membrane;GO:0005886|plasma membrane;GO:0009506|plasmodesma;GO:0005802|trans-Golgi network;	GO:0016760|cellulose synthase (UDP-forming) activity;GO:0008270|zinc ion binding;	K10999	CESA; cellulose synthase A [EC:2.4.1.12]
Potri.005G017600.v3.0	153	157	136	93.84620968	19	40	47	4.751328526	2.248330964	1.01E-22	6.35E-22	up	yes	Potri.005G017600	protein_coding	chrChr05:1421844-1430768:+	gi|743889988|ref|XP_011038919.1|	5020	0	PREDICTED: lon protease homolog 1, mitochondrial-like [Populus euphratica]	gi|743889987|ref|XM_011040617.1|	3273	0	PREDICTED: Populus euphratica lon protease homolog 1, mitochondrial-like (LOC105135640), mRNA	P93655	1430	0	Lon protease homolog 1, mitochondrial	SPAC22F3.06c	728	0	COG0466	pfam05362	Lon_C	Lon protease (S16) C-terminal proteolytic domain. The Lon serine proteases must hydrolyse ATP to degrade protein substrates. In Escherichia coli, these proteases are involved in turnover of intracellular proteins, including abnormal proteins following heat-shock. The active site for protease activity resides in a C-terminal domain. The Lon proteases are classified as family S16 in Merops.	GO:0034599|cellular response to oxidative stress;GO:0051131|chaperone-mediated protein complex assembly;GO:0006515|misfolded or incompletely synthesized protein catabolic process;GO:0007005|mitochondrion organization;GO:0070407|oxidation-dependent protein catabolic process;GO:0090296|regulation of mitochondrial DNA replication;	GO:0005759|mitochondrial matrix;	GO:0005524|ATP binding;GO:0004176|ATP-dependent peptidase activity;GO:0070361|mitochondrial light strand promoter anti-sense binding;GO:0043565|sequence-specific DNA binding;GO:0004252|serine-type endopeptidase activity;GO:0003697|single-stranded DNA binding;	K08675	PRSS15, PIM1; Lon-like ATP-dependent protease [EC:3.4.21.-]
Potri.005G035300.v3.0	160	161	145	98.43432168	29	42	39	4.7485862	2.247498043	1.71E-25	1.17E-24	up	yes	Potri.005G035300	protein_coding	chrChr05:2611965-2616292:-	gi|743882503|ref|XP_011036768.1|	1881	0	PREDICTED: mevalonate kinase-like [Populus euphratica]	gi|743882502|ref|XM_011038466.1|	1400	0	PREDICTED: Populus euphratica mevalonate kinase-like (LOC105134162), transcript variant X1, mRNA	P46086	495	2.00E-169	Mevalonate kinase	SPAC13G6.11c	149	1.00E-38	COG1577	pfam08544	GHMP_kinases_C	GHMP kinases C terminal. This family includes homoserine kinases, galactokinases and mevalonate kinases.	GO:0019287|isopentenyl diphosphate biosynthetic process, mevalonate pathway;GO:0016126|sterol biosynthetic process;	GO:0005829|cytosol;	GO:0005524|ATP binding;GO:0004496|mevalonate kinase activity;	K00869	E2.7.1.36, MVK, mvaK1; mevalonate kinase [EC:2.7.1.36]
Potri.T068000.v3.0	78	97	65	50.29960437	19	25	12	4.742708937	2.245711332	3.62E-13	1.50E-12	up	yes	Potri.T068000	protein_coding	chrscaffold_73:47548-48826:+	gi|566193185|ref|XP_006377192.1|	1265	4.00E-170	hypothetical protein POPTR_0011s01800g [Populus trichocarpa]	gi|566193184|ref|XM_006377130.1|	1201	0	Populus trichocarpa hypothetical protein (POPTR_0011s01800g) mRNA, complete cds	.	.	.	.	.	.	.	.	pfam15229	POM121	POM121 family.	.	.	.	.	.
Potri.010G222600.v3.0	76	88	46	43.63422456	20	14	14	4.741593215	2.245371898	2.86E-11	1.08E-10	up	yes	Potri.010G222600	protein_coding	chrChr10:20691704-20692519:-	gi|566192277|ref|XP_006378766.1|	465	1.00E-55	hypothetical protein POPTR_0010s22940g [Populus trichocarpa]	gi|566192276|ref|XM_006378704.1|	495	0	Populus trichocarpa hypothetical protein (POPTR_0010s22940g) mRNA, complete cds	.	.	.	.	.	.	.	.	pfam02096	60KD_IMP	60Kd inner membrane protein.	.	.	.	.	.
Potri.009G084300.v3.0	334	311	288	196.8981578	45	86	92	4.723933874	2.23998877	6.32E-42	6.71E-41	up	yes	Potri.009G084300	protein_coding	chrChr09:7894767-7901489:-	gi|566187041|ref|XP_002313196.2|	3390	0	hypothetical protein POPTR_0009s08760g [Populus trichocarpa]	gi|566187040|ref|XM_002313160.2|	2183	0	Populus trichocarpa hypothetical protein (POPTR_0009s08760g) mRNA, complete cds	F4JJT9	998	0	Aspartate--tRNA ligase, chloroplastic/mitochondrial	all2436	723	0	COG0173	pfam00152	tRNA-synt_2	tRNA synthetases class II (D, K and N).	GO:0006418|tRNA aminoacylation for protein translation;	GO:0009507|chloroplast;GO:0016020|membrane;GO:0005739|mitochondrion;	GO:0004815|aspartate-tRNA ligase activity;GO:0005524|ATP binding;GO:0003677|DNA binding;GO:0046872|metal ion binding;	K01876	DARS, aspS; aspartyl-tRNA synthetase [EC:6.1.1.12]
Potri.015G039100.v3.0	240	207	165	128.5862501	50	52	41	4.723385524	2.239821293	8.78E-30	6.88E-29	up	yes	Potri.015G039100	protein_coding	chrChr15:3566414-3569217:+	gi|591289067|gb|AHL29310.1|	1787	0	WOX1b [Populus tomentosa]	gi|743929163|ref|XM_011010505.1|	1531	0	PREDICTED: Populus euphratica WUSCHEL-related homeobox 1 (LOC105114087), mRNA	Q6X7K0	195	5.00E-55	WUSCHEL-related homeobox 1	.	.	.	.	pfam00046	Homeobox	Homeobox domain.	GO:0006351|transcription, DNA-templated;	GO:0005829|cytosol;GO:0005634|nucleus;	GO:0003677|DNA binding;GO:0003700|transcription factor activity, sequence-specific DNA binding;	.	.
Potri.005G055800.v3.0	460	436	377	268.5902221	85	118	99	4.707836163	2.235064114	1.08E-61	1.73E-60	up	yes	Potri.005G055800	protein_coding	chrChr05:3932917-3937933:-	gi|566169703|ref|XP_006382818.1|	2565	0	hypothetical protein POPTR_0005s05760g [Populus trichocarpa]	gi|566169702|ref|XM_006382756.1|	1936	0	Populus trichocarpa hypothetical protein (POPTR_0005s05760g) mRNA, complete cds	.	.	.	.	RSc0533	126	1.00E-30	COG3380	pfam13450	NAD_binding_8	NAD(P)-binding Rossmann-like domain.	.	.	.	.	.
Potri.002G083900.v3.0	490	484	345	276.5531194	93	111	108	4.680251515	2.226586062	1.65E-61	2.63E-60	up	yes	Potri.002G083900	protein_coding	chrChr02:5873504-5875717:-	gi|566156927|ref|XP_002302235.2|	1074	2.00E-143	hypothetical protein POPTR_0002s08440g [Populus trichocarpa]	gi|566156926|ref|XM_002302199.2|	1152	0	Populus trichocarpa hypothetical protein (POPTR_0002s08440g) mRNA, complete cds	.	.	.	.	.	.	.	.	pfam05340	DUF740	Protein of unknown function (DUF740). This family consists of several uncharacterized plant proteins of unknown function.	.	.	.	.	.
Potri.002G060100.v3.0	231	254	160	134.6742615	37	41	75	4.668319882	2.222903421	1.43E-26	1.02E-25	up	yes	Potri.002G060100	protein_coding	chrChr02:4089214-4090115:+	gi|224062748|ref|XP_002300883.1|	722	3.00E-93	hypothetical protein POPTR_0002s06090g [Populus trichocarpa]	gi|224062747|ref|XM_002300847.1|	779	0	Populus trichocarpa hypothetical protein (POPTR_0002s06090g) mRNA, complete cds	Q9LXR7	79.7	4.00E-17	Transcription factor PAR2	.	.	.	.	pfam04502	DUF572	Family of unknown function (DUF572). Family of eukaryotic proteins with undetermined function.	GO:0009742|brassinosteroid mediated signaling pathway;GO:0007623|circadian rhythm;GO:0032502|developmental process;GO:0040008|regulation of growth;GO:0006355|regulation of transcription, DNA-templated;GO:0009641|shade avoidance;GO:0006351|transcription, DNA-templated;	GO:0005634|nucleus;	.	.	.
Potri.009G133300.v3.0	906	1020	772	568.4952391	167	232	248	4.654646652	2.218671653	1.66E-109	5.64E-108	up	yes	Potri.009G133300	protein_coding	chrChr09:10783635-10785586:-	gi|566187832|ref|XP_002312969.2|	2468	0	flavonoid 3-O-galactosyl transferase family protein [Populus trichocarpa]	gi|566187831|ref|XM_002312933.2|	1952	0	Populus trichocarpa flavonoid 3-O-galactosyl transferase family protein (POPTR_0009s13580g) mRNA, complete cds	Q5UL10	401	4.00E-131	Anthocyanidin 3-O-glucosyltransferase 2	.	.	.	.	pfam00201	UDPGT	UDP-glucoronosyl and UDP-glucosyl transferase.	GO:0009718|anthocyanin-containing compound biosynthetic process;	.	GO:0047213|anthocyanidin 3-O-glucosyltransferase activity;	.	.
Potri.006G035300.v3.0	468	497	399	288.3871789	97	109	121	4.639950948	2.214109554	2.94E-64	4.96E-63	up	yes	Potri.006G035300	protein_coding	chrChr06:2375511-2382071:-	gi|566174257|ref|XP_002308873.2|	2522	0	proline-rich family protein [Populus trichocarpa]	gi|566174256|ref|XM_002308837.2|	1585	0	Populus trichocarpa proline-rich family protein (POPTR_0006s03380g) mRNA, complete cds	F4IIZ9	669	0	Stomatal closure-related actin-binding protein 2	.	.	.	.	pfam01576	Myosin_tail_1	Myosin tail. The myosin molecule is a multi-subunit complex made up of two heavy chains and four light chains it is a fundamental contractile protein found in all eukaryote cell types. This family consists of the coiled-coil myosin heavy chain tail region. The coiled-coil is composed of the tail from two molecules of myosin. These can then assemble into the macromolecular thick filament. The coil…	.	GO:0005737|cytoplasm;GO:0005856|cytoskeleton;GO:0005886|plasma membrane;	.	.	.
Potri.003G102600.v3.0	86	85	53	46.88074788	18	13	22	4.628205575	2.210452947	3.90E-12	1.54E-11	up	yes	Potri.003G102600	protein_coding	chrChr03:12807848-12813611:-	gi|743847672|ref|XP_011028039.1|	3211	0	PREDICTED: probable methyltransferase PMT20 [Populus euphratica]	gi|743847671|ref|XM_011029737.1|	2355	0	PREDICTED: Populus euphratica probable methyltransferase PMT20 (LOC105128186), transcript variant X1, mRNA	Q94II3	1035	0	Probable methyltransferase PMT21	.	.	.	.	pfam03141	Methyltransf_29	Putative S-adenosyl-L-methionine-dependent methyltransferase. This family is a putative S-adenosyl-L-methionine (SAM)-dependent methyltransferase.	GO:0032259|methylation;	GO:0005789|endoplasmic reticulum membrane;GO:0005768|endosome;GO:0005794|Golgi apparatus;GO:0016021|integral component of membrane;GO:0005802|trans-Golgi network;GO:0005774|vacuolar membrane;	GO:0008757|S-adenosylmethionine-dependent methyltransferase activity;	.	.
Potri.019G048800.v3.0	130	139	119	82.20994617	23	32	39	4.625948028	2.209749058	6.80E-21	3.98E-20	up	yes	Potri.019G048800	protein_coding	chrChr19:7282142-7285236:-	gi|224145915|ref|XP_002325810.1|	2095	0	calcineurin B-like-interacting protein kinase [Populus trichocarpa]	gi|743941713|ref|XM_011017050.1|	1928	0	PREDICTED: Populus euphratica CBL-interacting protein kinase 18-like (LOC105118983), transcript variant X1, mRNA	Q7X996	548	0	CBL-interacting protein kinase 2	.	.	.	.	pfam00069	Pkinase	Protein kinase domain.	GO:0007165|signal transduction;	.	GO:0005524|ATP binding;GO:0004674|protein serine/threonine kinase activity;	.	.
Potri.010G150500.v3.0	38651	39708	29900	22811.91895	7183	10247	8717	4.610999519	2.205079515	0	0	up	yes	Potri.010G150500	protein_coding	chrChr10:15918247-15919226:+	gi|224108812|ref|XP_002314976.1|	569	3.00E-71	pop3 peptide family protein [Populus trichocarpa]	gi|566191073|ref|XM_002314940.2|	746	0	Populus trichocarpa pop3 peptide family protein (POPTR_0010s16030g) mRNA, complete cds	Q9LUV2	100	6.00E-25	Stress-response A/B barrel domain-containing protein HS1	.	.	.	.	pfam07876	Dabb	Stress responsive A/B Barrel Domain. The function of this family is unknown, but it is upregulated in response to salt stress in Populus balsamifera. It is also found at the C-terminus of an fructose 1,6-bisphosphate aldolase from Hydrogenophilus thermoluteolus. Arthrobacter nicotinovorans ORF106 is found in the pA01 plasmid, which encodes genes for molybdopterin uptake and degradation of plant a…	GO:0042742|defense response to bacterium;GO:0050832|defense response to fungus;	GO:0005829|cytosol;GO:0005886|plasma membrane;	GO:0046872|metal ion binding;	.	.
Potri.007G014800.v3.0	707	795	597	443.5424029	144	212	155	4.579036214	2.195043975	6.25E-85	1.50E-83	up	yes	Potri.007G014800	protein_coding	chrChr07:1118733-1126012:-	gi|566181206|ref|XP_006380794.1|	5150	0	hypothetical protein POPTR_0007s13860g [Populus trichocarpa]	gi|566181205|ref|XM_006380732.1|	3557	0	Populus trichocarpa hypothetical protein (POPTR_0007s13860g) mRNA, complete cds	F4JZ68	864	0	Kinesin-like protein KIN-7H	.	.	.	.	pfam00225	Kinesin	Kinesin motor domain.	GO:0007018|microtubule-based movement;	GO:0005871|kinesin complex;GO:0005874|microtubule;GO:0009506|plasmodesma;	GO:0005524|ATP binding;GO:0016887|ATPase activity;GO:0003777|microtubule motor activity;	K11498	CENPE; centromeric protein E
Potri.002G124600.v3.0	581	644	462	356.350029	134	127	146	4.571751903	2.192747115	2.01E-67	3.62E-66	up	yes	Potri.002G124600	protein_coding	chrChr02:9365648-9368074:+	gi|224063499|ref|XP_002301174.1|	1111	8.00E-143	hypothetical protein POPTR_0002s12620g [Populus trichocarpa]	gi|566157679|ref|XM_002301138.2|	1739	0	Populus trichocarpa hypothetical protein (POPTR_0002s12620g) mRNA, complete cds	.	.	.	.	.	.	.	.	pfam03168	LEA_2	Late embryogenesis abundant protein. Different types of LEA proteins are expressed at different stages of late embryogenesis in higher plant seed embryos and under conditions of dehydration stress. The function of these proteins is unknown. This family represents a group of LEA proteins that appear to be distinct from those in pfam02987. The family DUF1511, pfam07427, has now been merged into thi…	.	.	.	.	.
Potri.001G377900.v3.0	866	843	754	523.3842552	158	234	213	4.565079201	2.19063989	2.02E-101	6.10E-100	up	yes	Potri.001G377900	protein_coding	chrChr01:39342212-39347199:-	gi|566153524|ref|XP_002300426.2|	1613	0	hypothetical protein POPTR_0001s38710g [Populus trichocarpa]	gi|743925135|ref|XM_011008403.1|	1536	0	PREDICTED: Populus euphratica interactor of constitutive active ROPs 4-like (LOC105112638), transcript variant X1, mRNA	Q9M9F9	238	3.00E-71	Interactor of constitutive active ROPs 4	.	.	.	.	pfam08317	Spc7	Spc7 kinetochore protein. This domain is found in cell division proteins which are required for kinetochore-spindle association.	GO:0071555|cell wall organization;GO:0045490|pectin catabolic process;	GO:0005618|cell wall;GO:0005576|extracellular region;	GO:0047911|galacturan 1,4-alpha-galacturonidase activity;GO:0019863|IgE binding;GO:0004650|polygalacturonase activity;	.	.
Potri.011G110200.v3.0	77	90	55	46.52659491	14	21	19	4.560630067	2.189233152	1.45E-12	5.83E-12	up	yes	Potri.011G110200	protein_coding	chrChr11:13505207-13506908:+	gi|224114796|ref|XP_002316859.1|	2117	0	hypothetical protein POPTR_0011s11150g [Populus trichocarpa]	gi|160358407|gb|AC214468.1|	1702	0	Populus trichocarpa clone POP038-L21, complete sequence	Q39688	425	9.00E-143	Epidermis-specific secreted glycoprotein EP1	.	.	.	.	pfam01453	B_lectin	D-mannose binding lectin. These proteins include mannose-specific lectins from plants as well as bacteriocins from bacteria.	GO:0006833|water transport;	GO:0005576|extracellular region;	GO:0030246|carbohydrate binding;	.	.
Potri.004G102200.v3.0	245	254	229	154.9645028	45	76	59	4.547969407	2.18522255	1.66E-35	1.51E-34	up	yes	Potri.004G102200	protein_coding	chrChr04:8972084-8975309:-	gi|566165875|ref|XP_002305949.2|	1503	0	hypothetical protein POPTR_0004s10190g [Populus trichocarpa]	gi|566165874|ref|XM_002305913.2|	1257	0	Populus trichocarpa hypothetical protein (POPTR_0004s10190g) mRNA, complete cds	.	.	.	.	.	.	.	.	pfam09531	Ndc1_Nup	Nucleoporin protein Ndc1-Nup. Ndc1 is a nucleoporin protein that is a component of the Nuclear Pore Complex, and, in fungi, also of the Spindle Pole Body. It consists of six transmembrane segments, three lumenal loops, both concentrated at the N-terminus and cytoplasmic domains largely at the C-terminus, all of which are well conserved.	.	.	.	.	.
Potri.003G122400.v3.0	702	889	635	470.5574435	135	215	198	4.544173895	2.184018044	2.73E-81	6.16E-80	up	yes	Potri.003G122400	protein_coding	chrChr03:14446091-14449354:+	gi|224071735|ref|XP_002303565.1|	3435	0	scarecrow transcription factor family protein [Populus trichocarpa]	gi|743871192|ref|XM_011035492.1|	2993	0	PREDICTED: Populus euphratica scarecrow-like protein 28 (LOC105132162), mRNA	Q9CAN3	696	0	Scarecrow-like protein 28	.	.	.	.	pfam03514	GRAS	GRAS domain family. Proteins in the GRAS (GAI, RGA, SCR) family are known as major players in gibberellin (GA) signaling, which regulates various aspects of plant growth and development. Mutation of the SCARECROW (SCR) gene results in a radial pattern defect, loss of a ground tissue layer, in the root. The PAT1 protein is involved in phytochrome A signal transduction. A sequence, structure and ev…	GO:0006355|regulation of transcription, DNA-templated;GO:0006351|transcription, DNA-templated;	GO:0005634|nucleus;	GO:0043565|sequence-specific DNA binding;GO:0003700|transcription factor activity, sequence-specific DNA binding;	.	.
Potri.016G088700.v3.0	242	294	217	159.0318759	37	89	61	4.542321913	2.183429953	3.42E-32	2.87E-31	up	yes	Potri.016G088700	protein_coding	chrChr16:7097575-7099033:-	gi|224140183|ref|XP_002323464.1|	960	8.00E-125	fasciclin-like AGP 13 family protein [Populus trichocarpa]	gi|566209438|ref|XM_002323428.2|	1171	0	Populus trichocarpa fasciclin-like AGP 13 family protein (POPTR_0016s09010g) mRNA, complete cds	Q8LEJ6	203	5.00E-60	Fasciclin-like arabinogalactan protein 11	.	.	.	.	pfam02469	Fasciclin	Fasciclin domain. This extracellular domain is found repeated four times in grasshopper fasciclin I as well as in proteins from mammals, sea urchins, plants, yeast and bacteria.	GO:0009834|plant-type secondary cell wall biogenesis;	GO:0031225|anchored component of membrane;GO:0005886|plasma membrane;	.	.	.
Potri.001G216000.v3.0	122	119	88	69.41534777	21	31	29	4.52240526	2.17709028	5.08E-18	2.65E-17	up	yes	Potri.001G216000	protein_coding	chrChr01:21888451-21891103:-	gi|743902511|ref|XP_011044595.1|	2071	0	PREDICTED: protein FAF-like, chloroplastic [Populus euphratica]	gi|743902510|ref|XM_011046293.1|	1949	0	PREDICTED: Populus euphratica protein FAF-like, chloroplastic (LOC105139734), mRNA	Q0V865	172	1.00E-44	Protein FAF-like, chloroplastic	.	.	.	.	pfam11250	DUF3049	Protein of unknown function (DUF3049). This eukaryotic family of proteins has no known function.	.	GO:0009507|chloroplast;	.	.	.
Potri.019G004000.v3.0	88	85	72	51.88702548	12	26	23	4.522253585	2.177041893	1.09E-13	4.67E-13	up	yes	Potri.019G004000	protein_coding	chrChr19:398318-407742:-	gi|566223100|ref|XP_006370924.1|	4546	0	hypothetical protein POPTR_0019s01800g [Populus trichocarpa]	gi|566223099|ref|XM_006370862.1|	3370	0	Populus trichocarpa hypothetical protein (POPTR_0019s01800g) mRNA, complete cds	Q9Y4F3	66.2	3.00E-09	Meiosis arrest female protein 1	.	.	.	.	pfam01936	NYN	NYN domain. These domains are found in the eukaryotic proteins typified by the Nedd4-binding protein 1 and the bacterial YacP-like proteins (Nedd4-BP1, YacP nucleases; NYN domains). The NYN domain shares a common protein fold with two other previously characterized groups of nucleases, namely the PIN (PilT N-terminal) and FLAP/5' --> 3' exonuclease superfamilies. These proteins share a common set…	GO:0006302|double-strand break repair;GO:0007143|female meiotic division;GO:0010923|negative regulation of phosphatase activity;GO:0048477|oogenesis;GO:0010468|regulation of gene expression;	GO:0016020|membrane;GO:0005777|peroxisome;	GO:0000166|nucleotide binding;GO:0003723|RNA binding;	K17573	LKAP, MARF1; meiosis arrest female protein 1
Potri.016G007800.v3.0	25	20	13	12.18869893	6	6	2	4.516452636	2.175190079	0.00036879	0.000816731	up	yes	Potri.016G007800	protein_coding	chrChr16:375996-378917:+	gi|743893876|ref|XP_011040181.1|	1522	0	PREDICTED: uncharacterized protein LOC105136498 [Populus euphratica]	gi|743893875|ref|XM_011041879.1|	1154	0	PREDICTED: Populus euphratica uncharacterized LOC105136498 (LOC105136498), mRNA	.	.	.	.	.	.	.	.	pfam08614	ATG16	Autophagy protein 16 (ATG16). Autophagy is a ubiquitous intracellular degradation system for eukaryotic cells. During autophagy, cytoplasmic components are enclosed in autophagosomes and delivered to lysosomes/vacuoles. ATG16 (also known as Apg16) has been shown to be bind to Apg5 and is required for the function of the Apg12p-Apg5p conjugate in the yeast autophagy pathway.	.	.	.	.	.
Potri.014G135100.v3.0	1337	1213	940	738.5759923	251	335	278	4.483846503	2.164736891	1.54E-118	5.92E-117	up	yes	Potri.014G135100	protein_coding	chrChr14:10283601-10284341:-	gi|224131244|ref|XP_002321036.1|	466	2.00E-55	hydroxyproline-rich glycoprotein [Populus trichocarpa]	gi|566204024|ref|XM_002321000.2|	721	0	Populus trichocarpa hydroxyproline-rich glycoprotein (POPTR_0014s12960g) mRNA, complete cds	.	.	.	.	.	.	.	.	pfam07174	FAP	Fibronectin-attachment protein (FAP). This family contains bacterial fibronectin-attachment proteins (FAP). Family members are rich in alanine and proline, are approximately 300 long, and seem to be restricted to mycobacteria. These proteins contain a fibronectin-binding motif that allows mycobacteria to bind to fibronectin in the extracellular matrix.	.	.	.	.	.
Potri.006G142600.v3.0	28405	26506	21100	16120.91861	5081	7441	6482	4.465076608	2.158684928	0	0	up	yes	Potri.006G142600	protein_coding	chrChr06:12045935-12047019:-	gi|566176413|ref|XP_006381632.1|	1147	6.00E-155	hypothetical protein POPTR_0006s14510g [Populus trichocarpa]	gi|566176412|ref|XM_006381570.1|	1073	0	Populus trichocarpa hypothetical protein (POPTR_0006s14510g) mRNA, complete cds	O04011	281	4.00E-92	Auxin-binding protein ABP20	.	.	.	.	pfam00190	Cupin_1	Cupin. This family represents the conserved barrel domain of the 'cupin' superfamily ('cupa' is the Latin term for a small barrel). This family contains 11S and 7S plant seed storage proteins, and germins. Plant seed storage proteins provide the major nitrogen source for the developing plant.	GO:0009734|auxin-activated signaling pathway;	GO:0048046|apoplast;GO:0005618|cell wall;	GO:0030145|manganese ion binding;GO:0045735|nutrient reservoir activity;	.	.
Potri.002G124500.v3.0	400	392	348	243.3410029	75	105	107	4.448707628	2.153386287	3.63E-53	4.94E-52	up	yes	Potri.002G124500	protein_coding	chrChr02:9360805-9363432:+	gi|566157678|ref|XP_006386505.1|	3856	0	hypothetical protein POPTR_0002s12610g [Populus trichocarpa]	gi|566157677|ref|XM_006386443.1|	2523	0	Populus trichocarpa hypothetical protein (POPTR_0002s12610g) mRNA, complete cds	Q9FHA4	583	0	Subtilisin-like protease SBT1.9	.	.	.	.	pfam00082	Peptidase_S8	Subtilase family. Subtilases are a family of serine proteases. They appear to have independently and convergently evolved an Asp/Ser/His catalytic triad, like that found in the trypsin serine proteases (see pfam00089). Structure is an alpha/beta fold containing a 7-stranded parallel beta sheet, order 2314567.	GO:0006508|proteolysis;	GO:0005618|cell wall;GO:0005576|extracellular region;	GO:0004252|serine-type endopeptidase activity;	.	.
Potri.019G083900.v3.0	484	487	356	280.915114	91	138	103	4.448179187	2.153214906	1.01E-58	1.53E-57	up	yes	Potri.019G083900	protein_coding	chrChr19:11678588-11680344:+	gi|566240704|ref|XP_002325557.2|	510	5.00E-61	hypothetical protein POPTR_0019s11360g [Populus trichocarpa]	gi|566240703|ref|XM_002325521.2|	1053	0	Populus trichocarpa hypothetical protein (POPTR_0019s11360g) mRNA, complete cds	Q8GWK5	102	4.00E-25	Gibberellin-regulated protein 9	.	.	.	.	pfam02704	GASA	Gibberellin regulated protein. This is the GASA gibberellin regulated cysteine rich protein family. The expression of these proteins is up-regulated by the plant hormone gibberellin, most of these proteins have some role in plant development. There are 12 cysteine residues conserved within the alignment giving the potential for these proteins to posses 6 disulphide bonds.	GO:0009740|gibberellic acid mediated signaling pathway;	GO:0005576|extracellular region;	.	.	.
Potri.018G044200.v3.0	272	323	267	184.3051403	48	94	80	4.37981157	2.130868803	2.18E-37	2.09E-36	up	yes	Potri.018G044200	protein_coding	chrChr18:4017910-4024850:+	gi|566214792|ref|XP_002324795.2|	4754	0	hypothetical protein POPTR_0018s08030g [Populus trichocarpa]	gi|566214791|ref|XM_002324759.2|	3464	0	Populus trichocarpa hypothetical protein (POPTR_0018s08030g) mRNA, complete cds	.	.	.	.	.	.	.	.	pfam05664	DUF810	Protein of unknown function (DUF810). This family consists of several plant proteins of unknown function.	.	.	.	.	.
Potri.002G052700.v3.0	219	246	181	137.4061003	43	74	48	4.374569792	2.129141145	2.31E-30	1.84E-29	up	yes	Potri.002G052700	protein_coding	chrChr02:3497765-3503863:+	gi|566156365|ref|XP_002300845.2|	3629	0	hypothetical protein POPTR_0002s05360g [Populus trichocarpa]	gi|566156364|ref|XM_002300809.2|	2537	0	Populus trichocarpa hypothetical protein (POPTR_0002s05360g) mRNA, complete cds	B9DHT4	994	0	ARM REPEAT PROTEIN INTERACTING WITH ABF2	.	.	.	.	pfam00651	BTB	BTB/POZ domain. The BTB (for BR-C, ttk and bab) or POZ (for Pox virus and Zinc finger) domain is present near the N-terminus of a fraction of zinc finger (pfam00096) proteins and in proteins that contain the pfam01344 motif such as Kelch and a family of pox virus proteins. The BTB/POZ domain mediates homomeric dimerization and in some instances heteromeric dimerization. The structure of the dimer…	GO:0010187|negative regulation of seed germination;GO:0016567|protein ubiquitination;GO:0009737|response to abscisic acid;GO:0009651|response to salt stress;	GO:0005737|cytoplasm;GO:0005634|nucleus;GO:0005886|plasma membrane;	.	.	.
Potri.011G142800.v3.0	135	174	101	86.49878188	25	36	43	4.373918322	2.12892628	1.77E-19	9.80E-19	up	yes	Potri.011G142800	protein_coding	chrChr11:16394662-16397619:+	gi|566195498|ref|XP_002317018.2|	2952	0	hypothetical protein POPTR_0011s14600g [Populus trichocarpa]	gi|566195497|ref|XM_002316982.2|	1944	0	Populus trichocarpa hypothetical protein (POPTR_0011s14600g) mRNA, complete cds	Q6Q3H3	649	0	(-)-germacrene D synthase	.	.	.	.	pfam03936	Terpene_synth_C	Terpene synthase family, metal binding domain. It has been suggested that this gene family be designated tps (for terpene synthase). It has been split into six subgroups on the basis of phylogeny, called tpsa-tpsf. tpsa includes vetispiridiene synthase, 5-epi- aristolochene synthase, and (+)-delta-cadinene synthase. tpsb includes (-)-limonene synthase. tpsc includes kaurene synthase A. tpsd inclu…	GO:0016114|terpenoid biosynthetic process;	GO:0005737|cytoplasm;	GO:0034004|germacradienol synthase activity;GO:0052577|germacrene-D synthase activity;GO:0000287|magnesium ion binding;	K15803	GERD; (-)-germacrene D synthase [EC:4.2.3.22 4.2.3.75]
Potri.001G202100.v3.0	633	542	488	355.5529963	116	150	159	4.368967691	2.127292437	3.55E-67	6.36E-66	up	yes	Potri.001G202100	protein_coding	chrChr01:19829944-19831499:-	gi|743927641|ref|XP_011008000.1|	2390	0	PREDICTED: protein TOO MANY MOUTHS [Populus euphratica]	gi|566150088|ref|XM_006369249.1|	1450	0	Populus trichocarpa hypothetical protein (POPTR_0001s20940g) mRNA, complete cds	Q9SSD1	597	0	Protein TOO MANY MOUTHS	alr0124_1	82.8	5.00E-16	COG4886	pfam13855	LRR_8	Leucine rich repeat.	GO:0008356|asymmetric cell division;GO:0009737|response to abscisic acid;	GO:0031225|anchored component of membrane;GO:0016021|integral component of membrane;GO:0016020|membrane;GO:0005886|plasma membrane;	GO:0042277|peptide binding;GO:0004872|receptor activity;	.	.
Potri.008G088300.v3.0	1117	1124	841	655.5861598	218	278	288	4.368297879	2.127071238	3.47E-120	1.37E-118	up	yes	Potri.008G088300	protein_coding	chrChr08:5538492-5540596:-	gi|224101377|ref|XP_002312253.1|	1046	2.00E-137	expansin 4 family protein [Populus trichocarpa]	gi|566183025|ref|XM_002312217.2|	1329	0	Populus trichocarpa expansin 4 family protein (POPTR_0008s08790g) mRNA, complete cds	Q9C554	335	2.00E-110	Expansin-A1	.	.	.	.	pfam01357	Pollen_allerg_1	Pollen allergen. This family contains allergens lol PI, PII and PIII from Lolium perenne.	GO:0009664|plant-type cell wall organization;	GO:0005618|cell wall;GO:0005576|extracellular region;GO:0016020|membrane;	.	.	.
Potri.002G093100.v3.0	3605	3348	2582	2027.363297	652	994	790	4.363817214	2.125590673	2.75E-187	2.28E-185	up	yes	Potri.002G093100	protein_coding	chrChr02:6666471-6668040:+	gi|224063201|ref|XP_002301038.1|	846	3.00E-111	pollen Ole e 1 allergen and extensin family protein [Populus trichocarpa]	gi|224063200|ref|XM_002301002.1|	926	0	Populus trichocarpa pollen Ole e 1 allergen and extensin family protein (POPTR_0002s09370g) mRNA, complete cds	P33050	127	1.00E-33	Pollen-specific protein C13	.	.	.	.	pfam01190	Pollen_Ole_e_I	Pollen proteins Ole e I like.	.	GO:0005615|extracellular space;	.	.	.
Potri.015G130100.v3.0	317	309	275	193.3984405	66	79	87	4.336434278	2.116509245	4.02E-42	4.29E-41	up	yes	Potri.015G130100	protein_coding	chrChr15:14150287-14154390:+	gi|743896859|ref|XP_011041704.1|	3302	0	PREDICTED: LRR receptor-like serine/threonine-protein kinase GSO2 [Populus euphratica]	gi|566207580|ref|XM_006374594.1|	2765	0	Populus trichocarpa hypothetical protein (POPTR_0015s14480g) mRNA, complete cds	Q6R2J8	214	2.00E-57	Protein STRUBBELIG-RECEPTOR FAMILY 8	.	.	.	.	pfam07714	Pkinase_Tyr	Protein tyrosine kinase.	.	GO:0016021|integral component of membrane;GO:0005886|plasma membrane;	GO:0005524|ATP binding;GO:0004672|protein kinase activity;	.	.
Potri.001G300700.v3.0	1075	1172	912	675.0452557	224	325	265	4.33138638	2.114828873	3.08E-119	1.20E-117	up	yes	Potri.001G300700	protein_coding	chrChr01:30476901-30480587:+	gi|566151909|ref|XP_002300237.2|	3323	0	hypothetical protein POPTR_0001s30800g [Populus trichocarpa]	gi|743858252|ref|XM_011032098.1|	2592	0	PREDICTED: Populus euphratica receptor protein kinase-like protein At4g34220 (LOC105129859), mRNA	Q94C77	625	0	Receptor protein kinase-like protein At4g34220	Cgl2127_1	80.5	6.00E-15	COG0515	pfam00069	Pkinase	Protein kinase domain.	.	GO:0016021|integral component of membrane;	GO:0005524|ATP binding;GO:0004672|protein kinase activity;	.	.
Potri.002G165800.v3.0	339	316	265	196.7521577	67	92	78	4.328773502	2.113958315	1.73E-43	1.91E-42	up	yes	Potri.002G165800	protein_coding	chrChr02:12503077-12504947:-	gi|224067948|ref|XP_002302613.1|	2413	0	fatty acid desaturase/cytochrome b5 fusion protein mRNA [Populus trichocarpa]	gi|566158407|ref|XM_002302577.2|	1792	0	Populus trichocarpa fatty acid desaturase/cytochrome b5 fusion protein mRNA (POPTR_0002s16740g) mRNA, complete cds	Q3EBF7	728	0	Delta(8)-fatty-acid desaturase 2	YNL111c	62.8	1.00E-10	COG5274	pfam00487	FA_desaturase	Fatty acid desaturase.	GO:0070417|cellular response to cold;GO:0030148|sphingolipid biosynthetic process;	GO:0005783|endoplasmic reticulum;GO:0005789|endoplasmic reticulum membrane;GO:0016021|integral component of membrane;	GO:0046872|metal ion binding;GO:0052631|sphingolipid delta-8 desaturase activity;	K13076	SLD; delta8-fatty-acid desaturase [EC:1.14.19.4]
Potri.003G093200.v3.0	588	624	484	362.47451	131	177	128	4.327550222	2.113550563	8.25E-69	1.51E-67	up	yes	Potri.003G093200	protein_coding	chrChr03:12041835-12044639:-	gi|566161732|ref|XP_006385664.1|	1265	5.00E-169	hypothetical protein POPTR_0003s09200g [Populus trichocarpa]	gi|743848189|ref|XM_011029868.1|	1465	0	PREDICTED: Populus euphratica transcription factor bHLH71 (LOC105128272), mRNA	Q56XR0	202	4.00E-58	Transcription factor bHLH71	.	.	.	.	pfam00010	HLH	Helix-loop-helix DNA-binding domain.	GO:0007275|multicellular organismal development;GO:0006355|regulation of transcription, DNA-templated;GO:0006351|transcription, DNA-templated;	GO:0005634|nucleus;	GO:0003677|DNA binding;GO:0003700|transcription factor activity, sequence-specific DNA binding;	.	.
Potri.015G126900.v3.0	465	481	403	288.888275	88	142	120	4.320730519	2.111275254	4.86E-60	7.53E-59	up	yes	Potri.015G126900	protein_coding	chrChr15:13930753-13936089:+	gi|224134464|ref|XP_002321830.1|	2051	0	trehalose-6-phosphate phosphatase family protein [Populus trichocarpa]	gi|566207631|ref|XM_002321794.2|	2113	0	Populus trichocarpa trehalose-6-phosphate phosphatase family protein (POPTR_0015s14810g) mRNA, complete cds	O64896	526	3.00E-180	Trehalose-phosphate phosphatase A	MT3482_2	158	2.00E-42	COG1877	pfam02358	Trehalose_PPase	Trehalose-phosphatase. This family consist of trehalose-phosphatases EC:3.1.3.12 these enzyme catalyse the de-phosphorylation of trehalose-6-phosphate to trehalose and orthophosphate. The aligned region is present in trehalose-phosphatases and comprises the entire length of the protein it is also found in the C-terminus of trehalose-6-phosphate synthase EC:2.4.1.15 adjacent to the trehalose-6-pho…	GO:0005992|trehalose biosynthetic process;GO:0070413|trehalose metabolism in response to stress;	GO:0005737|cytoplasm;	GO:0004805|trehalose-phosphatase activity;	K01087	otsB; trehalose 6-phosphate phosphatase [EC:3.1.3.12]
Potri.003G111800.v3.0	279	286	211	165.2138719	47	73	81	4.310237458	2.107767352	3.82E-36	3.52E-35	up	yes	Potri.003G111800	protein_coding	chrChr03:13543630-13544908:+	gi|224071553|ref|XP_002303513.1|	1393	0	hypothetical protein POPTR_0003s11110g [Populus trichocarpa]	gi|566162094|ref|XM_002303477.2|	1258	0	Populus trichocarpa hypothetical protein (POPTR_0003s11110g) mRNA, complete cds	.	.	.	.	.	.	.	.	pfam04592	SelP_N	Selenoprotein P, N terminal region. SelP is the only known eukaryotic selenoprotein that contains multiple selenocysteine (Sec) residues, and accounts for more than 50% of the selenium content of rat and human plasma. It is thought to be glycosylated. SelP may have antioxidant properties. It can attach to epithelial cells, and may protect vascular endothelial cells against peroxynitrite toxicity.…	.	.	.	.	.
Potri.013G041300.v3.0	346	330	245	196.2516402	69	82	86	4.308358214	2.107138206	1.80E-42	1.94E-41	up	yes	Potri.013G041300	protein_coding	chrChr13:2893391-2895320:-	gi|224125652|ref|XP_002319642.1|	1022	8.00E-135	auxin-induced protein IAA4 [Populus trichocarpa]	gi|566199307|ref|XM_002319606.2|	1319	0	Populus trichocarpa auxin-induced protein IAA4 (POPTR_0013s03860g) mRNA, complete cds	P32294	254	4.00E-80	Auxin-induced protein 22B	.	.	.	.	pfam02309	AUX_IAA	AUX/IAA family. Transcription of the AUX/IAA family of genes is rapidly induced by the plant hormone auxin. Some members of this family are longer and contain an N terminal DNA binding domain. The function of this region is uncertain.	GO:0009734|auxin-activated signaling pathway;GO:0006355|regulation of transcription, DNA-templated;GO:0006351|transcription, DNA-templated;	GO:0005634|nucleus;	.	.	.
Potri.011G156600.v3.0	102	120	88	66.06302157	16	35	30	4.302044073	2.105022305	7.00E-16	3.32E-15	up	yes	Potri.011G156600	protein_coding	chrChr11:17446449-17447702:+	gi|224115610|ref|XP_002317078.1|	851	1.00E-109	hypothetical protein POPTR_0011s16010g [Populus trichocarpa]	gi|566195753|ref|XM_002317042.2|	1166	0	Populus trichocarpa hypothetical protein (POPTR_0011s16010g) mRNA, complete cds	Q9LW68	204	9.00E-62	Protein LIGHT-DEPENDENT SHORT HYPOCOTYLS 4	.	.	.	.	pfam04852	DUF640	Protein of unknown function (DUF640). This family represents a conserved region found in plant proteins including Resistance protein-like protein.	GO:0009299|mRNA transcription;GO:0009886|post-embryonic morphogenesis;GO:0006355|regulation of transcription, DNA-templated;	GO:0005634|nucleus;	GO:0003677|DNA binding;	.	.
Potri.006G018500.v3.0	94	79	80	54.81094393	27	17	21	4.288153556	2.100356569	1.79E-12	7.17E-12	up	yes	Potri.006G018500	protein_coding	chrChr06:1206057-1207381:-	gi|566173997|ref|XP_006380907.1|	416	1.00E-45	hypothetical protein POPTR_0006s01960g [Populus trichocarpa]	gi|743920937|ref|XM_011006223.1|	481	0	PREDICTED: Populus euphratica keratinocyte proline-rich protein-like (LOC105110998), transcript variant X2, mRNA	.	.	.	.	.	.	.	.	pfam01500	Keratin_B2	Keratin, high sulfur B2 protein. High sulfur proteins are cysteine-rich proteins synthesized during the differentiation of hair matrix cells, and form hair fibres in association with hair keratin intermediate filaments. This family has been divided up into four regions, with the second region containing 8 copies of a short repeat. This family is also known as B2 or KAP1.	.	.	.	.	.
Potri.006G200300.v3.0	1132	1121	880	670.1536491	231	293	289	4.286558943	2.099819982	1.38E-123	5.77E-122	up	yes	Potri.006G200300	protein_coding	chrChr06:21552110-21555071:+	gi|224091467|ref|XP_002309262.1|	2073	0	hypothetical protein POPTR_0006s21460g [Populus trichocarpa]	gi|566177431|ref|XM_002309226.2|	1901	0	Populus trichocarpa hypothetical protein (POPTR_0006s21460g) mRNA, complete cds	Q66GR0	617	0	Fasciclin-like arabinogalactan protein 17	.	.	.	.	pfam02469	Fasciclin	Fasciclin domain. This extracellular domain is found repeated four times in grasshopper fasciclin I as well as in proteins from mammals, sea urchins, plants, yeast and bacteria.	.	GO:0005576|extracellular region;GO:0005773|vacuole;	.	.	.
Potri.014G128000.v3.0	163	141	110	88.22981859	27	44	37	4.275317788	2.096031661	1.48E-20	8.57E-20	up	yes	Potri.014G128000	protein_coding	chrChr14:9802119-9806912:-	gi|743791715|ref|XP_011042104.1|	2321	0	PREDICTED: poly [ADP-ribose] polymerase 2-like isoform X2 [Populus euphratica]	gi|743791714|ref|XM_011043802.1|	1437	0	PREDICTED: Populus euphratica poly [ADP-ribose] polymerase 2-like (LOC105137878), transcript variant X2, mRNA	Q5Z8Q9	535	0	Poly [ADP-ribose] polymerase 2-A	.	.	.	.	pfam00644	PARP	Poly(ADP-ribose) polymerase catalytic domain. Poly(ADP-ribose) polymerase catalyses the covalent attachment of ADP-ribose units from NAD+ to itself and to a limited number of other DNA binding proteins, which decreases their affinity for DNA. Poly(ADP-ribose) polymerase is a regulatory component induced by DNA damage. The carboxyl-terminal region is the most highly conserved region of the protein…	GO:0051103|DNA ligation involved in DNA repair;GO:0006273|lagging strand elongation;GO:0006471|protein ADP-ribosylation;	GO:0005737|cytoplasm;GO:0005634|nucleus;	GO:0003677|DNA binding;GO:0003910|DNA ligase (ATP) activity;GO:0003950|NAD+ ADP-ribosyltransferase activity;	.	.
Potri.001G467300.v3.0	472	500	395	293.2763056	95	135	130	4.239932887	2.084041429	1.43E-61	2.29E-60	up	yes	Potri.001G467300	protein_coding	chrChr01:50038322-50042170:+	gi|224056849|ref|XP_002299054.1|	5127	0	kinase family protein [Populus trichocarpa]	gi|566155326|ref|XM_002299018.2|	3735	0	Populus trichocarpa kinase family protein (POPTR_0001s47150g) mRNA, complete cds	C0LGR3	1348	0	Probable LRR receptor-like serine/threonine-protein kinase At4g26540	alr0124_1	110	3.00E-24	COG4886	pfam00069	Pkinase	Protein kinase domain.	.	GO:0016021|integral component of membrane;GO:0005886|plasma membrane;	GO:0005524|ATP binding;GO:0004674|protein serine/threonine kinase activity;	.	.
Potri.008G070200.v3.0	83	89	48	46.33230609	10	24	24	4.228348216	2.080094192	6.86E-11	2.52E-10	up	yes	Potri.008G070200	protein_coding	chrChr08:4311488-4316200:+	gi|743781638|ref|XP_010999799.1|	2158	0	PREDICTED: protein trichome birefringence-like 30 [Populus euphratica]	gi|743781637|ref|XM_011001497.1|	1427	0	PREDICTED: Populus euphratica protein trichome birefringence-like 30 (LOC105107513), mRNA	Q9LY46	429	6.00E-144	Protein ESKIMO 1	.	.	.	.	pfam13839	PC-Esterase	GDSL/SGNH-like Acyl-Esterase family found in Pmr5 and Cas1p. The PC-Esterase family is comprised of Cas1p, the Homo sapiens C7orf58, Arabidopsis thaliana PMR5 and a group of plant freezing resistance/coldacclimatization proteins typified by Arabidopsis thaliana ESKIMO1. animal FAM55D proteins, and animal FAM113 proteins. The PC-Esterase family has features that are both similar and different from…	GO:0045893|positive regulation of transcription, DNA-templated;GO:0009409|response to cold;GO:0050826|response to freezing;GO:0045492|xylan biosynthetic process;	GO:0005794|Golgi apparatus;GO:0000139|Golgi membrane;GO:0016021|integral component of membrane;	GO:0016413|O-acetyltransferase activity;GO:1990538|xylan O-acetyltransferase activity;	.	.
Potri.001G005000.v3.0	244	239	181	141.9781935	45	86	45	4.220726205	2.077491246	2.41E-27	1.76E-26	up	yes	Potri.001G005000	protein_coding	chrChr01:335093-337546:+	gi|566147148|ref|XP_002297632.2|	817	5.00E-111	hypothetical protein POPTR_0001s04230g [Populus trichocarpa]	gi|566147147|ref|XM_002297596.2|	684	0	Populus trichocarpa hypothetical protein (POPTR_0001s04230g) mRNA, complete cds	Q6NLS8	246	9.00E-80	Peptidyl-tRNA hydrolase, mitochondrial	BS_spoVC	109	9.00E-27	COG0193	pfam01195	Pept_tRNA_hydro	Peptidyl-tRNA hydrolase.	GO:0032543|mitochondrial translation;GO:0006397|mRNA processing;GO:0008380|RNA splicing;	GO:0030529|ribonucleoprotein complex;GO:0005739|mitochondrion;	GO:0004045|aminoacyl-tRNA hydrolase activity;	K01056	PTH1, pth, spoVC; peptidyl-tRNA hydrolase, PTH1 family [EC:3.1.1.29]
Potri.015G080800.v3.0	147	222	141	109.2086083	37	33	64	4.211461281	2.074320902	8.77E-19	4.73E-18	up	yes	Potri.015G080800	protein_coding	chrChr15:10532393-10536855:-	gi|566206740|ref|XP_002322182.2|	5055	0	hypothetical protein POPTR_0015s09240g [Populus trichocarpa]	gi|566206739|ref|XM_002322146.2|	3867	0	Populus trichocarpa hypothetical protein (POPTR_0015s09240g) mRNA, complete cds	C0LGR3	979	0	Probable LRR receptor-like serine/threonine-protein kinase At4g26540	alr0124_1	95.1	2.00E-19	COG4886	pfam00069	Pkinase	Protein kinase domain.	.	GO:0016021|integral component of membrane;GO:0005886|plasma membrane;	GO:0005524|ATP binding;GO:0004674|protein serine/threonine kinase activity;	.	.
Potri.008G116500.v3.0	217	204	174	127.9078849	36	59	64	4.197444543	2.069511264	5.54E-28	4.15E-27	up	yes	Potri.008G116500	protein_coding	chrChr08:7464575-7466763:-	gi|224101677|ref|XP_002312379.1|	1830	0	hypothetical protein POPTR_0008s11540g [Populus trichocarpa]	gi|566183471|ref|XM_002312343.2|	949	0	Populus trichocarpa hypothetical protein (POPTR_0008s11540g) mRNA, complete cds	Q84V83	442	8.00E-150	Leucoanthocyanidin reductase	.	.	.	.	pfam05368	NmrA	NmrA-like family. NmrA is a negative transcriptional regulator involved in the post-translational modification of the transcription factor AreA. NmrA is part of a system controlling nitrogen metabolite repression in fungi. This family only contains a few sequences as iteration results in significant matches to other Rossmann fold families.	GO:0010023|proanthocyanidin biosynthetic process;	.	GO:0033788|leucoanthocyanidin reductase activity;	K13081	LAR; leucoanthocyanidin reductase [EC:1.17.1.3]
Potri.004G061600.v3.0	72	71	47	40.57976402	16	16	18	4.186713227	2.065818103	2.46E-10	8.72E-10	up	yes	Potri.004G061600	protein_coding	chrChr04:5047692-5049923:-	gi|566165169|ref|XP_002305054.2|	2345	0	hypothetical protein POPTR_0004s06010g [Populus trichocarpa]	gi|743911852|ref|XM_011001489.1|	1760	0	PREDICTED: Populus euphratica uncharacterized LOC105107532 (LOC105107532), transcript variant X3, mRNA	.	.	.	.	.	.	.	.	pfam04859	DUF641	Plant protein of unknown function (DUF641). Plant protein of unknown function.	.	.	.	.	.
Potri.016G072900.v3.0	68	45	60	37.73459833	12	23	12	4.174412743	2.061573253	8.36E-09	2.70E-08	up	yes	Potri.016G072900	protein_coding	chrChr16:5466667-5467504:-	gi|566209190|ref|XP_002323398.2|	1137	2.00E-154	hypothetical protein POPTR_0016s07380g [Populus trichocarpa]	gi|566209189|ref|XM_002323362.2|	838	0	Populus trichocarpa hypothetical protein (POPTR_0016s07380g) mRNA, complete cds	Q9FMC8	157	2.00E-44	Transcription repressor OFP13	.	.	.	.	pfam04844	Ovate	Transcriptional repressor, ovate. This is a family of transcriptional repressors. In plants, these proteins are important regulators of growth and development.	GO:0045892|negative regulation of transcription, DNA-templated;GO:0006351|transcription, DNA-templated;	GO:0005634|nucleus;	.	.	.
Potri.010G244900.v3.0	437	430	368	266.6035277	86	125	122	4.150907868	2.053426911	1.75E-54	2.44E-53	up	yes	Potri.010G244900	protein_coding	chrChr10:21994487-21999548:-	gi|743831836|ref|XP_011024125.1|	2000	0	PREDICTED: fasciclin-like arabinogalactan protein 17 [Populus euphratica]	gi|743831835|ref|XM_011025823.1|	1896	0	PREDICTED: Populus euphratica fasciclin-like arabinogalactan protein 17 (LOC105125405), transcript variant X1, mRNA	Q66GR0	580	0	Fasciclin-like arabinogalactan protein 17	.	.	.	.	pfam02469	Fasciclin	Fasciclin domain. This extracellular domain is found repeated four times in grasshopper fasciclin I as well as in proteins from mammals, sea urchins, plants, yeast and bacteria.	.	GO:0005576|extracellular region;GO:0005773|vacuole;	.	.	.
Potri.001G376600.v3.0	165	172	127	99.52908308	30	52	43	4.148163331	2.0524727	1.18E-22	7.39E-22	up	yes	Potri.001G376600	protein_coding	chrChr01:39239320-39247447:-	gi|566153498|ref|XP_002300421.2|	2267	0	hypothetical protein POPTR_0001s38570g [Populus trichocarpa]	gi|566153497|ref|XM_002300385.2|	1780	0	Populus trichocarpa hypothetical protein (POPTR_0001s38570g) mRNA, complete cds	Q9C5J6	570	0	tRNA dimethylallyltransferase 9	CPn0910	180	7.00E-50	COG0324	pfam01715	IPPT	IPP transferase. This is a family of IPP transferases EC:2.5.1.8 also known as tRNA delta(2)-isopentenylpyrophosphate transferase. These enzymes modify both cytoplasmic and mitochondrial tRNAs at A(37) to give isopentenyl A(37).	GO:0009691|cytokinin biosynthetic process;GO:0006400|tRNA modification;	GO:0005737|cytoplasm;	GO:0005524|ATP binding;GO:0052381|tRNA dimethylallyltransferase activity;	K00791	miaA, TRIT1; tRNA dimethylallyltransferase [EC:2.5.1.75]
Potri.001G410700.v3.0	451	456	347	269.5572107	93	137	107	4.145417742	2.051517492	2.36E-54	3.28E-53	up	yes	Potri.001G410700	protein_coding	chrChr01:43489106-43492581:-	gi|566154710|ref|XP_006370577.1|	950	1.00E-125	FLAVODOXIN-LIKE QUINONE REDUCTASE 1 family protein [Populus trichocarpa]	gi|566154709|ref|XM_006370515.1|	874	0	Populus trichocarpa FLAVODOXIN-LIKE QUINONE REDUCTASE 1 family protein (POPTR_0001s43940g) mRNA, complete cds	Q6NQE2	345	4.00E-117	Probable NAD(P)H dehydrogenase (quinone) FQR1-like 1	YPO1857	173	6.00E-51	COG0655	pfam03358	FMN_red	NADPH-dependent FMN reductase.	GO:0055114|oxidation-reduction process;	GO:0005737|cytoplasm;GO:0005886|plasma membrane;GO:0009506|plasmodesma;	GO:0010181|FMN binding;GO:0003955|NAD(P)H dehydrogenase (quinone) activity;	K03809	wrbA; NAD(P)H dehydrogenase (quinone) [EC:1.6.5.2]
Potri.015G144800.v3.0	21	13	24	12.86165765	4	6	6	4.142526495	2.050510925	0.000520087	0.001131913	up	yes	Potri.015G144800	protein_coding	chrChr15:15029759-15031082:-	gi|224137020|ref|XP_002322474.1|	1021	1.00E-136	hypothetical protein POPTR_0015s13050g [Populus trichocarpa]	gi|566207348|ref|XM_002322438.2|	1067	0	Populus trichocarpa hypothetical protein (POPTR_0015s13050g) mRNA, complete cds	.	.	.	.	.	.	.	.	pfam06521	PAR1	PAR1 protein. This family consists of several plant specific PAR1 proteins from Nicotiana tabacum and Arabidopsis thaliana. The function of this family is unknown.	.	.	.	.	.
Potri.013G005300.v3.0	20	24	19	13.65308278	6	8	3	4.120299262	2.042749126	0.000273286	0.00061403	up	yes	Potri.013G005300	protein_coding	chrChr13:349092-349835:+	gi|566198685|ref|XP_006375715.1|	355	1.00E-39	hypothetical protein POPTR_0013s00670g [Populus trichocarpa]	gi|566198684|ref|XM_006375653.1|	629	0	Populus trichocarpa hypothetical protein (POPTR_0013s00670g) mRNA, complete cds	.	.	.	.	.	.	.	.	pfam05675	DUF817	Protein of unknown function (DUF817). This family consists of several bacterial proteins of unknown function.	.	.	.	.	.
Potri.018G126000.v3.0	11683	11196	9059	6902.64801	2422	3353	2968	4.072153448	2.025791926	0	0	up	yes	Potri.018G126000	protein_coding	chrChr18:14854721-14856804:+	gi|743816495|ref|XP_011020188.1|	322	7.00E-32	PREDICTED: 36.4 kDa proline-rich protein-like [Populus euphratica]	gi|566215528|ref|XM_002324595.2|	1258	0	Populus trichocarpa hypothetical protein (POPTR_0018s12630g) mRNA, complete cds	Q00451	79.3	7.00E-15	36.4 kDa proline-rich protein	.	.	.	.	pfam14547	Hydrophob_seed	Hydrophobic seed protein. This domain has a four-helix bundle structure. It contains four disulfide bonds, of which three function to keep the C- and N-terminal parts of the molecule in place.	GO:0006887|exocytosis;GO:0046909|intermembrane transport;GO:0061025|membrane fusion;GO:0015031|protein transport;GO:0009737|response to abscisic acid;GO:0009651|response to salt stress;GO:0010118|stomatal movement;GO:0006906|vesicle fusion;	GO:0016021|integral component of membrane;GO:0031902|late endosome membrane;GO:0005886|plasma membrane;GO:0031201|SNARE complex;GO:0005774|vacuolar membrane;GO:0005773|vacuole;	GO:0005484|SNAP receptor activity;GO:0000149|SNARE binding;	.	.
Potri.010G047700.v3.0	26	50	44	26.48943812	13	11	9	4.047075635	2.016879812	2.62E-06	7.09E-06	up	yes	Potri.010G047700	protein_coding	chrChr10:7885995-7887533:+	gi|224110856|ref|XP_002315660.1|	1437	0	hypothetical protein POPTR_0010s05770g [Populus trichocarpa]	gi|743898212|ref|XM_011044095.1|	1346	0	PREDICTED: Populus euphratica uncharacterized LOC105138093 (LOC105138093), transcript variant X2, mRNA	.	.	.	.	.	.	.	.	pfam05910	DUF868	Plant protein of unknown function (DUF868). This family consists of several hypothetical proteins from Arabidopsis thaliana and Oryza sativa. The function of this family is unknown.	.	.	.	.	.
Potri.016G043700.v3.0	46	71	48	35.59003222	7	14	25	4.044437649	2.01593912	5.91E-08	1.81E-07	up	yes	Potri.016G043700	protein_coding	chrChr16:2726041-2729114:-	gi|566208635|ref|XP_002323272.2|	1427	0	hypothetical protein POPTR_0016s04300g [Populus trichocarpa]	gi|743869113|ref|XM_011034887.1|	1093	0	PREDICTED: Populus euphratica alpha carbonic anhydrase 4-like (LOC105131754), mRNA	F4JIK2	306	3.00E-100	Alpha carbonic anhydrase 4	BH0360	131	4.00E-34	COG3338	pfam00194	Carb_anhydrase	Eukaryotic-type carbonic anhydrase.	GO:0006730|one-carbon metabolic process;	GO:0009570|chloroplast stroma;GO:0009535|chloroplast thylakoid membrane;	GO:0004089|carbonate dehydratase activity;GO:0008270|zinc ion binding;	K01674	cah; carbonic anhydrase [EC:4.2.1.1]
Potri.015G086500.v3.0	2583	2668	2050	1578.851315	555	787	672	4.039670382	2.014237581	1.37E-205	1.35E-203	up	yes	Potri.015G086500	protein_coding	chrChr15:10969878-10973305:+	gi|743923058|ref|XP_011005610.1|	936	1.00E-148	PREDICTED: 28 kDa ribonucleoprotein, chloroplastic-like [Populus euphratica]	gi|566206825|ref|XM_002321613.2|	1355	0	Populus trichocarpa RNA-binding family protein (POPTR_0015s09810g) mRNA, complete cds	Q04836	147	1.00E-71	31 kDa ribonucleoprotein, chloroplastic	all2777	77.4	6.00E-16	COG0724	pfam00076	RRM_1	RNA recognition motif. (a.k.a. RRM, RBD, or RNP domain). The RRM motif is probably diagnostic of an RNA binding protein. RRMs are found in a variety of RNA binding proteins, including various hnRNP proteins, proteins implicated in regulation of alternative splicing, and protein components of snRNPs. The motif also appears in a few single stranded DNA binding proteins. The RRM structure consists o…	GO:0016553|base conversion or substitution editing;GO:0009631|cold acclimation;GO:0045087|innate immune response;GO:0006397|mRNA processing;GO:0009409|response to cold;GO:0009451|RNA modification;GO:0006396|RNA processing;GO:0043489|RNA stabilization;	GO:0009507|chloroplast;GO:0009941|chloroplast envelope;GO:0009570|chloroplast stroma;GO:0009535|chloroplast thylakoid membrane;GO:0030529|ribonucleoprotein complex;GO:0009579|thylakoid;	GO:0000166|nucleotide binding;GO:0008266|poly(U) RNA binding;GO:0003723|RNA binding;	.	.
Potri.002G238800.v3.0	726	696	619	443.7472446	138	231	202	4.018548811	2.006674606	2.11E-74	4.27E-73	up	yes	Potri.002G238800	protein_coding	chrChr02:23182065-23187389:+	gi|566159692|ref|XP_002301766.2|	2246	0	hypothetical protein POPTR_0002s23990g [Populus trichocarpa]	gi|566159691|ref|XM_002301730.2|	2020	0	Populus trichocarpa hypothetical protein (POPTR_0002s23990g) mRNA, complete cds	Q9M8Z8	654	0	Probable pectate lyase 8	TM0433	75.9	7.00E-14	COG3866	pfam00544	Pec_lyase_C	Pectate lyase. This enzyme forms a right handed beta helix structure. Pectate lyase is an enzyme involved in the maceration and soft rotting of plant tissue.	GO:0045490|pectin catabolic process;	.	GO:0046872|metal ion binding;GO:0030570|pectate lyase activity;	K01728	pel; pectate lyase [EC:4.2.2.2]
Potri.008G167200.v3.0	120	138	94	75.84054697	23	42	33	4.012179936	2.004386308	6.26E-17	3.11E-16	up	yes	Potri.008G167200	protein_coding	chrChr08:11416640-11417974:-	gi|224102195|ref|XP_002312584.1|	942	2.00E-123	hypothetical protein POPTR_0008s16680g [Populus trichocarpa]	gi|566184367|ref|XM_002312548.2|	1146	0	Populus trichocarpa hypothetical protein (POPTR_0008s16680g) mRNA, complete cds	.	.	.	.	.	.	.	.	pfam05553	DUF761	Cotton fibre expressed protein. This family consists of several plant proteins of unknown function. Three of the sequences (from Gossypium hirsutum) in this family are described as cotton fibre expressed proteins. The remaining sequences, found in Arabidopsis thaliana, are uncharacterized.	.	.	.	.	.
Potri.001G004600.v3.0	2964	3042	2460	1839.16051	632	899	840	3.990288394	1.99649302	1.29E-230	1.55E-228	up	yes	Potri.001G004600	protein_coding	chrChr01:300313-308109:+	gi|224052904|ref|XP_002297631.1|	2153	0	alpha-tubulin 2 family protein [Populus trichocarpa]	gi|566147141|ref|XM_002297595.2|	1737	0	Populus trichocarpa alpha-tubulin 2 family protein (POPTR_0001s04180g) mRNA, complete cds	P33627	810	0	Tubulin alpha-6 chain	SPBC800.05c	620	0	COG5023	pfam03953	Tubulin_C	Tubulin C-terminal domain. This family includes the tubulin alpha, beta and gamma chains. Members of this family are involved in polymer formation. Tubulins are GTPases. FtsZ can polymerize into tubes, sheets, and rings in vitro and is ubiquitous in eubacteria and archaea. Tubulin is the major component of microtubules. (The FtsZ GTPases have been split into their won family).	GO:0007017|microtubule-based process;	GO:0005737|cytoplasm;GO:0005874|microtubule;	GO:0005525|GTP binding;GO:0003924|GTPase activity;GO:0005200|structural constituent of cytoskeleton;	K07374	TUBA; tubulin alpha
Potri.015G129400.v3.0	136	152	125	89.9025251	31	50	35	3.988487612	1.995841797	1.76E-19	9.72E-19	up	yes	Potri.015G129400	protein_coding	chrChr15:14100586-14102248:+	gi|224134510|ref|XP_002321841.1|	871	1.00E-110	fasciclin-like AGP 15 family protein [Populus trichocarpa]	gi|118481230|gb|EF144309.1|	1062	0	Populus trichocarpa clone PX0015_I05 unknown mRNA	Q8LEE9	205	5.00E-60	Fasciclin-like arabinogalactan protein 12	all5264	52	1.00E-06	COG2335	pfam02469	Fasciclin	Fasciclin domain. This extracellular domain is found repeated four times in grasshopper fasciclin I as well as in proteins from mammals, sea urchins, plants, yeast and bacteria.	GO:0009834|plant-type secondary cell wall biogenesis;	GO:0031225|anchored component of membrane;GO:0005886|plasma membrane;	.	.	.
Potri.001G292300.v3.0	173	158	162	108.2909081	44	57	38	3.970878611	1.989458259	3.52E-21	2.08E-20	up	yes	Potri.001G292300	protein_coding	chrChr01:29766456-29768774:-	gi|566151772|ref|XP_002298781.2|	1707	0	hypothetical protein POPTR_0001s29970g [Populus trichocarpa]	gi|566151771|ref|XM_002298745.2|	1470	0	Populus trichocarpa hypothetical protein (POPTR_0001s29970g) mRNA, complete cds	Q6YXH8	186	2.00E-51	Cyclin-D4-1	YGR109c	56.6	1.00E-07	COG5024	pfam00134	Cyclin_N	Cyclin, N-terminal domain. Cyclins regulate cyclin dependent kinases (CDKs). Human cyclin-O is a Uracil-DNA glycosylase that is related to other cyclins. Cyclins contain two domains of similar all-alpha fold, of which this family corresponds with the N-terminal domain.	GO:0007049|cell cycle;GO:0051301|cell division;	GO:0005634|nucleus;	.	K18810	CYCD1_2_4; cyclin D1/2/4, plant
Potri.012G144000.v3.0	762	774	646	475.6550101	187	229	196	3.968001412	1.988412539	2.95E-81	6.66E-80	up	yes	Potri.012G144000	protein_coding	chrChr12:15653934-15656201:-	gi|566198220|ref|XP_006377055.1|	1764	0	hypothetical protein POPTR_0012s12940g [Populus trichocarpa]	gi|566198219|ref|XM_006376993.1|	1912	0	Populus trichocarpa hypothetical protein (POPTR_0012s12940g) mRNA, complete cds	Q54GU0	134	6.00E-32	Putative transporter arsB	AF2308	117	2.00E-27	COG1055	pfam03600	CitMHS	Citrate transporter.	GO:0098656|anion transmembrane transport;GO:0015700|arsenite transport;	GO:0016021|integral component of membrane;GO:0005887|integral component of plasma membrane;	GO:0015446|arsenite-transmembrane transporting ATPase activity;GO:0005215|transporter activity;	.	.
Potri.005G237900.v3.0	789	832	607	483.4449579	174	260	197	3.930969022	1.974884994	1.10E-78	2.38E-77	up	yes	Potri.005G237900	protein_coding	chrChr05:24514913-24517569:+	gi|566173282|ref|XP_002306921.2|	1074	5.00E-141	hypothetical protein POPTR_0005s25910g [Populus trichocarpa]	gi|566173281|ref|XM_002306885.2|	1392	0	Populus trichocarpa hypothetical protein (POPTR_0005s25910g) mRNA, complete cds	Q8LE10	274	2.00E-86	HVA22-like protein i	SPBC30D10.09c	67.4	6.00E-12	COG5052	pfam03134	TB2_DP1_HVA22	TB2/DP1, HVA22 family. This family includes members from a wide variety of eukaryotes. It includes the TB2/DP1 (deleted in polyposis) protein, which in humans is deleted in severe forms of familial adenomatous polyposis, an autosomal dominant oncological inherited disease. The family also includes the plant protein of known similarity to TB2/DP1, the HVA22 abscisic acid-induced protein, which is …	GO:0010206|photosystem II repair;GO:0006457|protein folding;	GO:0009570|chloroplast stroma;GO:0009535|chloroplast thylakoid membrane;GO:0016021|integral component of membrane;	GO:0003756|protein disulfide isomerase activity;	.	.
Potri.007G044500.v3.0	102	81	58	51.99097564	17	20	31	3.925152862	1.97274884	3.75E-11	1.40E-10	up	yes	Potri.007G044500	protein_coding	chrChr07:3895650-3899241:-	gi|224094312|ref|XP_002310137.1|	1977	0	hypothetical protein POPTR_0007s10960g [Populus trichocarpa]	gi|566180680|ref|XM_002310101.2|	1234	0	Populus trichocarpa hypothetical protein (POPTR_0007s10960g) mRNA, complete cds	P61872	76.3	2.00E-13	Lipase	VC1418	54.7	7.00E-07	COG3675	pfam01764	Lipase_3	Lipase (class 3).	GO:0016042|lipid catabolic process;	GO:0005615|extracellular space;	GO:0046872|metal ion binding;GO:0004806|triglyceride lipase activity;	.	.
Potri.016G143400.v3.0	124	95	78	64.33140843	19	37	29	3.911283491	1.967642107	1.15E-13	4.90E-13	up	yes	Potri.016G143400	protein_coding	chrChr16:14408940-14409727:+	gi|566210368|ref|XP_002323109.2|	641	1.00E-80	hypothetical protein POPTR_0016s14990g [Populus trichocarpa]	gi|566210367|ref|XM_002323073.2|	614	0	Populus trichocarpa hypothetical protein (POPTR_0016s14990g) mRNA, complete cds	.	.	.	.	.	.	.	.	pfam13677	MotB_plug	Membrane MotB of proton-channel complex MotA/MotB. This is the MotB member of the E.coli MotA/MotB proton-channel complex that forms the stator of the bacterial membrane flagellar motor. Key residues act as a plug to prevent premature proton flow. The plug is in the periplasm just C-terminal to the MotB TM, consisting of an amphipathic alpha helix flanked by Pro-52 and Pro-65. In addition to the …	.	.	.	.	.
Potri.009G039500.v3.0	72	65	44	39.1684999	16	15	20	3.906856984	1.966008445	3.09E-09	1.03E-08	up	yes	Potri.009G039500	protein_coding	chrChr09:4745421-4748810:+	gi|743865531|ref|XP_011032201.1|	2603	0	PREDICTED: probable serine/threonine-protein kinase At5g41260 isoform X2 [Populus euphratica]	gi|743865530|ref|XM_011033899.1|	1741	0	PREDICTED: Populus euphratica probable serine/threonine-protein kinase At5g41260 (LOC105131102), transcript variant X2, mRNA	Q9FHD7	699	0	Probable serine/threonine-protein kinase At5g41260	.	.	.	.	pfam07714	Pkinase_Tyr	Protein tyrosine kinase.	.	GO:0005886|plasma membrane;	GO:0005524|ATP binding;GO:0004674|protein serine/threonine kinase activity;	K14500	BSK; BR-signaling kinase [EC:2.7.11.1]
Potri.017G112300.v3.0	884	916	715	547.9962019	194	280	245	3.902573795	1.964425913	3.60E-95	9.99E-94	up	yes	Potri.017G112300	protein_coding	chrChr17:12798655-12800110:-	gi|566213256|ref|XP_006373456.1|	1375	0	hypothetical protein POPTR_0017s13950g [Populus trichocarpa]	gi|566213255|ref|XM_006373394.1|	1437	0	Populus trichocarpa hypothetical protein (POPTR_0017s13950g) mRNA, complete cds	Q94IB1	252	2.00E-77	Protein rough sheath 2 homolog	ECU11g1690	82	7.00E-17	COG5147	pfam13921	Myb_DNA-bind_6	Myb-like DNA-binding domain. This family contains the DNA binding domains from Myb proteins, as well as the SANT domain family.	GO:0010338|leaf formation;GO:0006355|regulation of transcription, DNA-templated;GO:0006351|transcription, DNA-templated;	GO:0005634|nucleus;	GO:0003677|DNA binding;	K09422	MYBP; myb proto-oncogene protein, plant
Potri.009G026800.v3.0	483	410	384	279.3695777	93	155	120	3.897666238	1.962610556	1.71E-46	2.02E-45	up	yes	Potri.009G026800	protein_coding	chrChr09:3770571-3772328:-	gi|224104497|ref|XP_002313455.1|	2384	0	beta-ketoacyl-CoA synthase family protein [Populus trichocarpa]	gi|566186057|ref|XM_002313419.2|	1758	0	Populus trichocarpa beta-ketoacyl-CoA synthase family protein (POPTR_0009s03190g) mRNA, complete cds	Q9SIB2	660	0	3-ketoacyl-CoA synthase 12	DRA0326	58.5	3.00E-08	COG3424	pfam08392	FAE1_CUT1_RppA	FAE1/Type III polyketide synthase-like protein. The members of this family are described as 3-ketoacyl-CoA synthases, type III polyketide synthases, fatty acid elongases and fatty acid condensing enzymes, and are found in both prokaryotic and eukaryotic (mainly plant) species. The region featured in this family contains the active site residues, as well as motifs involved in substrate binding.	GO:0006633|fatty acid biosynthetic process;	GO:0005783|endoplasmic reticulum;GO:0016020|membrane;	.	K15397	KCS; 3-ketoacyl-CoA synthase [EC:2.3.1.199]
Potri.007G046900.v3.0	407	483	322	262.7085971	84	138	125	3.895878721	1.961948767	4.53E-46	5.28E-45	up	yes	Potri.007G046900	protein_coding	chrChr07:4312627-4317100:-	gi|743923418|ref|XP_011005801.1|	2980	0	PREDICTED: probable inactive receptor kinase At5g67200 [Populus euphratica]	gi|743923417|ref|XM_011007499.1|	2423	0	PREDICTED: Populus euphratica probable inactive receptor kinase At5g67200 (LOC105111970), mRNA	Q93Y06	450	4.00E-144	Probable inactive receptor kinase At5g67200	SPy1625_1	82.8	4.00E-16	COG0515	pfam00069	Pkinase	Protein kinase domain.	.	GO:0016021|integral component of membrane;GO:0005886|plasma membrane;	GO:0005524|ATP binding;GO:0004672|protein kinase activity;	.	.
Potri.002G214000.v3.0	347	373	326	229.3858709	76	125	102	3.880100278	1.956093938	5.72E-42	6.07E-41	up	yes	Potri.002G214000	protein_coding	chrChr02:19450066-19454335:-	gi|224068763|ref|XP_002302819.1|	1933	0	RNA-binding family protein [Populus trichocarpa]	gi|743939023|ref|XM_011015655.1|	1484	0	PREDICTED: Populus euphratica CUGBP Elav-like family member 6 (LOC105117871), transcript variant X1, mRNA	Q8LFS6	506	1.00E-173	RNA-binding protein BRN1	.	.	.	.	pfam00076	RRM_1	RNA recognition motif. (a.k.a. RRM, RBD, or RNP domain). The RRM motif is probably diagnostic of an RNA binding protein. RRMs are found in a variety of RNA binding proteins, including various hnRNP proteins, proteins implicated in regulation of alternative splicing, and protein components of snRNPs. The motif also appears in a few single stranded DNA binding proteins. The RRM structure consists o…	GO:0009908|flower development;GO:0006402|mRNA catabolic process;GO:0009626|plant-type hypersensitive response;GO:0080151|positive regulation of salicylic acid mediated signaling pathway;GO:2000028|regulation of photoperiodism, flowering;	GO:0005737|cytoplasm;GO:0030529|ribonucleoprotein complex;	GO:0003729|mRNA binding;GO:0000166|nucleotide binding;	K13207	CUGBP, BRUNOL, CELF; CUG-BP- and ETR3-like factor
Potri.004G229600.v3.0	1274	1239	1019	771.5827175	271	386	361	3.875390548	1.954341708	4.85E-122	1.97E-120	up	yes	Potri.004G229600	protein_coding	chrChr04:23480758-23482600:-	gi|566168339|ref|XP_006385095.1|	1303	4.00E-174	hypothetical protein POPTR_0004s23860g, partial [Populus trichocarpa]	gi|743849251|ref|XM_011030119.1|	995	0	PREDICTED: Populus euphratica zinc-finger homeodomain protein 4 (LOC105128445), mRNA	Q9M9S0	248	5.00E-75	Zinc-finger homeodomain protein 4	.	.	.	.	pfam04770	ZF-HD_dimer	ZF-HD protein dimerization region. This family of proteins has are plant transcription factors, and have been named ZF-HD for zinc finger homeodomain proteins, on the basis of similarity to proteins of known structure. This region is thought to be involved in the formation of homo and heterodimers, and may form a zinc finger.	GO:0048574|long-day photoperiodism, flowering;GO:0006355|regulation of transcription, DNA-templated;GO:0006351|transcription, DNA-templated;	GO:0005634|nucleus;	GO:0003677|DNA binding;GO:0046872|metal ion binding;GO:0042803|protein homodimerization activity;	.	.
Potri.001G096900.v3.0	47	52	36	29.30566894	9	16	14	3.866049226	1.950860007	1.97E-07	5.82E-07	up	yes	Potri.001G096900	protein_coding	chrChr01:7624960-7625790:+	gi|224053823|ref|XP_002297997.1|	886	1.00E-117	pathogenesis-related family protein [Populus trichocarpa]	gi|566148197|ref|XM_002297961.2|	809	0	Populus trichocarpa pathogenesis-related family protein (POPTR_0001s10120g) mRNA, complete cds	P13240	231	5.00E-74	Disease resistance response protein 206	.	.	.	.	pfam03018	Dirigent	Dirigent-like protein. This family contains a number of proteins which are induced during disease response in plants. Members of this family are involved in lignification.	GO:0006952|defense response;GO:0009607|response to biotic stimulus;	GO:0048046|apoplast;	.	.	.
Potri.001G408500.v3.0	284	256	216	165.3001219	55	82	83	3.842158778	1.94191714	2.95E-32	2.49E-31	up	yes	Potri.001G408500	protein_coding	chrChr01:43096028-43102776:-	gi|566154200|ref|XP_006370355.1|	2468	0	hypothetical protein POPTR_0001s41900g [Populus trichocarpa]	gi|566154199|ref|XM_006370293.1|	2017	0	Populus trichocarpa hypothetical protein (POPTR_0001s41900g) mRNA, complete cds	Q9C5E5	686	0	Diacylglycerol kinase 5	.	.	.	.	pfam00609	DAGK_acc	Diacylglycerol kinase accessory domain. Diacylglycerol (DAG) is a second messenger that acts as a protein kinase C activator. This domain is assumed to be an accessory domain: its function is unknown.	GO:0006952|defense response;GO:0007205|protein kinase C-activating G-protein coupled receptor signaling pathway;	.	GO:0005524|ATP binding;GO:0004143|diacylglycerol kinase activity;	K00901	dgkA, DGK; diacylglycerol kinase (ATP) [EC:2.7.1.107]
Potri.006G023000.v3.0	171	152	84	87.64471667	39	49	28	3.832851664	1.938418165	9.47E-15	4.27E-14	up	yes	Potri.006G023000	protein_coding	chrChr06:1605702-1606428:-	gi|566174091|ref|XP_002308830.2|	878	7.00E-113	hypothetical protein POPTR_0006s02380g [Populus trichocarpa]	gi|566174077|ref|XM_002308793.2|	656	0	Populus trichocarpa hypothetical protein (POPTR_0006s02310g) mRNA, complete cds	F8WLS6	236	1.00E-72	7-deoxyloganetin glucosyltransferase	.	.	.	.	pfam00201	UDPGT	UDP-glucoronosyl and UDP-glucosyl transferase.	GO:1900994|(-)-secologanin biosynthetic process;	.	GO:0035251|UDP-glucosyltransferase activity;	.	.
Potri.004G088400.v3.0	40	48	38	27.60764878	8	14	15	3.826408663	1.935990963	5.89E-07	1.68E-06	up	yes	Potri.004G088400	protein_coding	chrChr04:7428743-7429527:+	gi|224079449|ref|XP_002305870.1|	387	3.00E-43	hypothetical protein POPTR_0004s08700g [Populus trichocarpa]	gi|566165622|ref|XM_002305834.2|	667	0	Populus trichocarpa hypothetical protein (POPTR_0004s08700g) mRNA, complete cds	.	.	.	.	.	.	.	.	pfam04995	CcmD	Heme exporter protein D (CcmD). The CcmD protein is part of a C-type cytochrome biogenesis operon. The exact function of this protein is uncertain. It has been proposed that CcmC, CcmD and CcmE interact directly with each other, establishing a cytoplasm to periplasm haem delivery pathway for cytochrome c maturation. This protein is found fused to CcmE in Pseudomonas fluorescens heme exporter prot…	.	.	.	.	.
Potri.006G275900.v3.0	2208	2166	1746	1341.916297	500	670	625	3.799307036	1.925736306	5.42E-179	4.08E-177	up	yes	Potri.006G275900	protein_coding	chrChr06:27590301-27591910:+	gi|566178732|ref|XP_006382176.1|	1564	0	hypothetical protein POPTR_0006s29080g [Populus trichocarpa]	gi|566178731|ref|XM_006382114.1|	1212	0	Populus trichocarpa hypothetical protein (POPTR_0006s29080g) mRNA, complete cds	Q9S9K9	187	4.00E-54	Transcription factor MYB3	ECU11g1690	104	6.00E-25	COG5147	pfam00249	Myb_DNA-binding	Myb-like DNA-binding domain. This family contains the DNA binding domains from Myb proteins, as well as the SANT domain family.	GO:0009800|cinnamic acid biosynthetic process;GO:0009892|negative regulation of metabolic process;GO:0009737|response to abscisic acid;GO:0009751|response to salicylic acid;GO:0009651|response to salt stress;GO:0009611|response to wounding;GO:0006351|transcription, DNA-templated;	GO:0005634|nucleus;	GO:0003677|DNA binding;GO:0003700|transcription factor activity, sequence-specific DNA binding;	K09422	MYBP; myb proto-oncogene protein, plant
Potri.010G107900.v3.0	75	57	34	35.88499066	15	13	20	3.778330707	1.917748982	1.01E-07	3.06E-07	up	yes	Potri.010G107900	protein_coding	chrChr10:12741875-12744762:+	gi|224108295|ref|XP_002314792.1|	938	7.00E-126	calcium binding family protein [Populus trichocarpa]	gi|566190336|ref|XM_002314756.2|	471	0	Populus trichocarpa calcium binding family protein (POPTR_0010s11820g) mRNA, complete cds	Q9CAB7	230	5.00E-74	Probable peroxygenase 4	.	.	.	.	pfam05042	Caleosin	Caleosin related protein. This family contains plant proteins related to caleosin. Caleosins contain calcium-binding domains and have an oleosin-like association with lipid bodies. Caleosins are present at relatively low levels and are mainly bound to microsomal membrane fractions at the early stages of seed development. As the seeds mature, overall levels of caleosins increased dramatically and …	GO:0009819|drought recovery;GO:0009737|response to abscisic acid;	GO:0005811|lipid particle;	GO:0046872|metal ion binding;GO:1990137|plant seed peroxidase activity;	K17991	PXG; peroxygenase [EC:1.11.2.3]
Potri.003G102400.v3.0	60	82	71	47.28731218	21	25	17	3.775564036	1.916692187	5.16E-10	1.79E-09	up	yes	Potri.003G102400	protein_coding	chrChr03:12783594-12789219:-	gi|743847672|ref|XP_011028039.1|	3211	0	PREDICTED: probable methyltransferase PMT20 [Populus euphratica]	gi|743847671|ref|XM_011029737.1|	2358	0	PREDICTED: Populus euphratica probable methyltransferase PMT20 (LOC105128186), transcript variant X1, mRNA	Q94II3	1035	0	Probable methyltransferase PMT21	.	.	.	.	pfam03141	Methyltransf_29	Putative S-adenosyl-L-methionine-dependent methyltransferase. This family is a putative S-adenosyl-L-methionine (SAM)-dependent methyltransferase.	GO:0032259|methylation;	GO:0005789|endoplasmic reticulum membrane;GO:0005768|endosome;GO:0005794|Golgi apparatus;GO:0016021|integral component of membrane;GO:0005802|trans-Golgi network;GO:0005774|vacuolar membrane;	GO:0008757|S-adenosylmethionine-dependent methyltransferase activity;	.	.
Potri.003G126800.v3.0	952	980	830	607.9458084	212	343	266	3.774940069	1.91645374	1.12E-86	2.76E-85	up	yes	Potri.003G126800	protein_coding	chrChr03:14760652-14762710:-	gi|224074921|ref|XP_002304492.1|	2207	0	hypothetical protein POPTR_0003s12690g [Populus trichocarpa]	gi|743826026|ref|XM_011024398.1|	1571	0	PREDICTED: Populus euphratica tubulin beta chain-like (LOC105124386), mRNA	P45960	822	0	Tubulin beta-4 chain	ECU03g0820i	689	0	COG5023	pfam03953	Tubulin_C	Tubulin C-terminal domain. This family includes the tubulin alpha, beta and gamma chains. Members of this family are involved in polymer formation. Tubulins are GTPases. FtsZ can polymerize into tubes, sheets, and rings in vitro and is ubiquitous in eubacteria and archaea. Tubulin is the major component of microtubules. (The FtsZ GTPases have been split into their won family).	GO:0007017|microtubule-based process;	GO:0005737|cytoplasm;GO:0005874|microtubule;	GO:0005525|GTP binding;GO:0003924|GTPase activity;GO:0005200|structural constituent of cytoskeleton;	.	.
Potri.003G210200.v3.0	683	668	563	421.2683332	154	225	190	3.760394399	1.910883983	2.02E-71	3.88E-70	up	yes	Potri.003G210200	protein_coding	chrChr03:20927269-20929973:+	gi|566164055|ref|XP_006386102.1|	3045	0	hypothetical protein POPTR_0003s22110g [Populus trichocarpa]	gi|566164054|ref|XM_006386040.1|	2184	0	Populus trichocarpa hypothetical protein (POPTR_0003s22110g) mRNA, complete cds	Q9LXU9	600	0	IRK-interacting protein	.	.	.	.	pfam14702	hGDE_central	central domain of human glycogen debranching enzyme. this is a central domain of the eukaryotic variant of the glycogen debranching enzyme (GDE). The eukaryotic GDE performs two functions: 4-##-D-glucanotransferase (EC 2.4.1.25) and Amylo-##-1,6-glucosidase (EC 3.2.1.33), performed by the, respectively N- and C- terminal halfs of eukaryotic GDE enzyme The hGDE_central domain follows the glucanotr…	.	GO:0000786|nucleosome;GO:0005634|nucleus;	GO:0003677|DNA binding;	.	.
Potri.003G142000.v3.0	194	159	118	102.7860334	36	41	62	3.754493009	1.908618106	3.54E-18	1.86E-17	up	yes	Potri.003G142000	protein_coding	chrChr03:15869249-15872515:+	gi|566162592|ref|XP_002303661.2|	2464	0	hypothetical protein POPTR_0003s14190g [Populus trichocarpa]	gi|566162591|ref|XM_002303625.2|	2081	0	Populus trichocarpa hypothetical protein (POPTR_0003s14190g) mRNA, complete cds	P52410	668	0	3-oxoacyl-[acyl-carrier-protein] synthase I, chloroplastic	CPn0916	397	3.00E-130	COG0304	pfam00109	ketoacyl-synt	Beta-ketoacyl synthase, N-terminal domain. The structure of beta-ketoacyl synthase is similar to that of the thiolase family (pfam00108) and also chalcone synthase. The active site of beta-ketoacyl synthase is located between the N and C-terminal domains. The N-terminal domain contains most of the structures involved in dimer formation and also the active site cysteine.	GO:0006633|fatty acid biosynthetic process;	GO:0009570|chloroplast stroma;	GO:0004315|3-oxoacyl-[acyl-carrier-protein] synthase activity;	K09458	fabF; 3-oxoacyl-[acyl-carrier-protein] synthase II [EC:2.3.1.179]
Potri.001G093300.v3.0	455	417	377	275.7154238	105	138	129	3.751256932	1.90737408	1.17E-48	1.45E-47	up	yes	Potri.001G093300	protein_coding	chrChr01:7339475-7341388:-	gi|566148238|ref|XP_002299482.2|	1437	0	hypothetical protein POPTR_0001s10460g [Populus trichocarpa]	gi|743843259|ref|XM_011028611.1|	845	0	PREDICTED: Populus euphratica dihydroflavonol-4-reductase-like (LOC105127351), transcript variant X2, mRNA	P51107	177	1.00E-49	Dihydroflavonol 4-reductase	SA0317	93.2	2.00E-20	COG0451	pfam01370	Epimerase	NAD dependent epimerase/dehydratase family. This family of proteins utilize NAD as a cofactor. The proteins in this family use nucleotide-sugar substrates for a variety of chemical reactions.	GO:0009718|anthocyanin-containing compound biosynthetic process;	.	GO:0050662|coenzyme binding;GO:0045552|dihydrokaempferol 4-reductase activity;	K13082	DFR; bifunctional dihydroflavonol 4-reductase/flavanone 4-reductase [EC:1.1.1.219 1.1.1.234]
Potri.004G082000.v3.0	6222	6666	5120	3959.366574	1412	2102	1877	3.734466424	1.900902127	1.23E-272	2.15E-270	up	yes	Potri.004G082000	protein_coding	chrChr04:6760094-6762306:-	gi|224077380|ref|XP_002305237.1|	3060	0	hypothetical protein POPTR_0004s08030g [Populus trichocarpa]	gi|118487891|gb|EF147765.1|	1991	0	Populus trichocarpa clone WS0124_N24 unknown mRNA	Q9SS01	723	0	Benzoate--CoA ligase, peroxisomal	.	.	.	.	pfam00501	AMP-binding	AMP-binding enzyme.	GO:0006952|defense response;GO:0019761|glucosinolate biosynthetic process;	GO:0005777|peroxisome;	GO:0018858|benzoate-CoA ligase activity;	.	.
Potri.009G097800.v3.0	1184	1108	848	689.4450721	260	344	335	3.716440157	1.893921378	2.66E-99	7.84E-98	up	yes	Potri.009G097800	protein_coding	chrChr09:8756029-8758024:-	gi|566187247|ref|XP_006379186.1|	1475	0	hypothetical protein POPTR_0009s10060g [Populus trichocarpa]	gi|566187246|ref|XM_006379124.1|	1432	0	Populus trichocarpa hypothetical protein (POPTR_0009s10060g) mRNA, complete cds	P42753	310	1.00E-98	Cyclin-D3-1	.	.	.	.	pfam00134	Cyclin_N	Cyclin, N-terminal domain. Cyclins regulate cyclin dependent kinases (CDKs). Human cyclin-O is a Uracil-DNA glycosylase that is related to other cyclins. Cyclins contain two domains of similar all-alpha fold, of which this family corresponds with the N-terminal domain.	GO:0051301|cell division;GO:0000082|G1/S transition of mitotic cell cycle;GO:0007067|mitotic nuclear division;GO:0009735|response to cytokinin;GO:0009744|response to sucrose;GO:0048316|seed development;	GO:0005634|nucleus;	.	K14505	CYCD3; cyclin D3, plant
Potri.005G088700.v3.0	137	113	87	73.76578636	25	38	38	3.715908134	1.893714835	5.82E-15	2.65E-14	up	yes	Potri.005G088700	protein_coding	chrChr05:6630130-6631648:+	gi|224081322|ref|XP_002306370.1|	1239	3.00E-168	hypothetical protein POPTR_0005s09090g [Populus trichocarpa]	gi|566170305|ref|XM_002306334.2|	965	0	Populus trichocarpa hypothetical protein (POPTR_0005s09090g) mRNA, complete cds	Q9FTA0	234	5.00E-73	GEM-like protein 4	.	.	.	.	pfam02893	GRAM	GRAM domain. The GRAM domain is found in in glucosyltransferases, myotubularins and other putative membrane-associated proteins.	GO:0007568|aging;GO:0010623|developmental programmed cell death;	GO:0010282|senescence-associated vacuole;	GO:0008234|cysteine-type peptidase activity;	.	.
Potri.007G105300.v3.0	89	80	69	52.42788317	15	22	35	3.708180664	1.890711534	9.21E-11	3.36E-10	up	yes	Potri.007G105300	protein_coding	chrChr07:12971162-12973394:+	gi|566179542|ref|XP_006380377.1|	1746	0	hypothetical protein POPTR_0007s04220g [Populus trichocarpa]	gi|164663922|gb|AC216598.1|	1622	0	Populus trichocarpa clone POP037-D13, complete sequence	Q9FXA4	145	3.00E-36	U-box domain-containing protein 26	.	.	.	.	pfam04564	U-box	U-box domain. This domain is related to the Ring finger pfam00097 but lacks the zinc binding residues.	.	.	GO:0016874|ligase activity;GO:0004842|ubiquitin-protein transferase activity;	.	.
Potri.T024000.v3.0	26	27	23	16.81505828	6	8	9	3.695829639	1.885898257	0.000115095	0.000268988	up	yes	Potri.T024000	protein_coding	chrscaffold_29:472483-473109:+	gi|566256367|ref|XP_006388142.1|	480	2.00E-58	hypothetical protein POPTR_0315s00200g [Populus trichocarpa]	gi|164519398|gb|AC216449.1|	575	0	Populus trichocarpa clone POP006-O09, complete sequence	Q9LSQ6	101	2.00E-25	Calcium-binding protein PBP1	.	.	.	.	pfam13833	EF-hand_8	EF-hand domain pair.	GO:0009733|response to auxin;	.	GO:0005509|calcium ion binding;	.	.
Potri.017G071000.v3.0	80	118	86	62.68771728	16	28	43	3.680553003	1.879922547	2.99E-11	1.12E-10	up	yes	Potri.017G071000	protein_coding	chrChr17:8153444-8156671:-	gi|566212619|ref|XP_002324001.2|	3654	0	hypothetical protein POPTR_0017s10720g [Populus trichocarpa]	gi|566212618|ref|XM_002323965.2|	2506	0	Populus trichocarpa hypothetical protein (POPTR_0017s10720g) mRNA, complete cds	Q9SS87	696	0	Protein SIEVE ELEMENT OCCLUSION B	.	.	.	.	pfam14576	SEO_N	Sieve element occlusion N-terminus. Sieve element occlusion (SEO) proteins, or forisomes, are phloem proteins which accumulate during sieve element differentiation. This domain represents the N-terminus of SEO proteins.	GO:0010088|phloem development;	.	GO:0042803|protein homodimerization activity;GO:0043621|protein self-association;	.	.
Potri.002G218000.v3.0	29	20	9	12.49437698	6	4	7	3.678959935	1.879297965	0.001674	0.003424259	up	yes	Potri.002G218000	protein_coding	chrChr02:20272523-20275249:+	gi|566159345|ref|XP_002301589.2|	1109	3.00E-151	hypothetical protein POPTR_0002s22030g [Populus trichocarpa]	gi|743891426|ref|XM_011041047.1|	339	2.00E-176	PREDICTED: Populus euphratica rho GDP-dissociation inhibitor 1-like (LOC105135937), mRNA	Q9SFC6	262	4.00E-86	Rho GDP-dissociation inhibitor 1	.	.	.	.	pfam02115	Rho_GDI	RHO protein GDP dissociation inhibitor.	GO:0009932|cell tip growth;GO:0010053|root epidermal cell differentiation;	GO:0005737|cytoplasm;	GO:0005096|GTPase activator activity;GO:0005094|Rho GDP-dissociation inhibitor activity;	K12462	ARHGDI, RHOGDI; Rho GDP-dissociation inhibitor
Potri.016G117100.v3.0	809	842	711	522.964176	193	287	239	3.678172631	1.878989193	1.86E-80	4.15E-79	up	yes	Potri.016G117100	protein_coding	chrChr16:12152454-12154936:-	gi|224140423|ref|XP_002323582.1|	1920	0	hypothetical protein POPTR_0016s12440g [Populus trichocarpa]	gi|566209921|ref|XM_002323546.2|	1055	0	Populus trichocarpa hypothetical protein (POPTR_0016s12440g) mRNA, complete cds	P51091	244	3.00E-73	Leucoanthocyanidin dioxygenase	PA4191	115	3.00E-27	COG3491	pfam14226	DIOX_N	non-haem dioxygenase in morphine synthesis N-terminal. This is the highly conserved N-terminal region of proteins with 2-oxoglutarate/Fe(II)-dependent dioxygenase activity.	GO:0009718|anthocyanin-containing compound biosynthetic process;	.	GO:0031418|L-ascorbic acid binding;GO:0050589|leucocyanidin oxygenase activity;GO:0046872|metal ion binding;	.	.
Potri.011G154500.v3.0	122	139	136	88.87227027	28	45	51	3.621913404	1.856752053	4.42E-16	2.12E-15	up	yes	Potri.011G154500	protein_coding	chrChr11:17304321-17308196:-	gi|224117836|ref|XP_002317680.1|	4797	0	hypothetical protein POPTR_0011s15780g [Populus trichocarpa]	gi|743894644|ref|XM_011042277.1|	2870	0	PREDICTED: Populus euphratica alpha-glucosidase-like (LOC105136795), mRNA	O04893	1128	0	Alpha-glucosidase	lin0222	339	1.00E-100	COG1501	pfam01055	Glyco_hydro_31	Glycosyl hydrolases family 31. Glycosyl hydrolases are key enzymes of carbohydrate metabolizm. Family 31 comprises of enzymes that are, or similar to, alpha- galactosidases.	.	.	GO:0004558|alpha-1,4-glucosidase activity;GO:0030246|carbohydrate binding;GO:0032450|maltose alpha-glucosidase activity;	.	.
Potri.003G072800.v3.0	381	380	333	243.5930535	100	130	108	3.612834211	1.853131053	8.30E-42	8.75E-41	up	yes	Potri.003G072800	protein_coding	chrChr03:10170070-10174363:-	gi|566161307|ref|XP_002304257.2|	2893	0	pectinesterase family protein [Populus trichocarpa]	gi|566161306|ref|XM_002304221.2|	2077	0	Populus trichocarpa pectinesterase family protein (POPTR_0003s07040g) mRNA, complete cds	P83948	831	0	Pectinesterase 3	CAC3373	126	1.00E-30	COG4677	pfam01095	Pectinesterase	Pectinesterase.	GO:0042545|cell wall modification;GO:0045490|pectin catabolic process;	GO:0005618|cell wall;GO:0005576|extracellular region;	GO:0045330|aspartyl esterase activity;GO:0004857|enzyme inhibitor activity;GO:0030599|pectinesterase activity;	.	.
Potri.017G080200.v3.0	101	103	69	60.22639818	29	26	28	3.612726602	1.853088081	3.67E-12	1.45E-11	up	yes	Potri.017G080200	protein_coding	chrChr17:9409399-9412871:+	gi|743929411|ref|XP_011008939.1|	2009	0	PREDICTED: aldose 1-epimerase-like [Populus euphratica]	gi|566212776|ref|XM_006373249.1|	1409	0	Populus trichocarpa hypothetical protein (POPTR_0017s11660g) mRNA, complete cds	Q5EA79	259	3.00E-80	Aldose 1-epimerase	TM0282	260	1.00E-80	COG2017	pfam01263	Aldose_epim	Aldose 1-epimerase.	GO:0033499|galactose catabolic process via UDP-galactose;GO:0006006|glucose metabolic process;	GO:0005737|cytoplasm;GO:0070062|extracellular exosome;	GO:0004034|aldose 1-epimerase activity;GO:0030246|carbohydrate binding;	K01785	galM, GALM; aldose 1-epimerase [EC:5.1.3.3]
Potri.009G140300.v3.0	142	147	134	94.4371574	37	43	51	3.610598168	1.852237868	4.02E-18	2.10E-17	up	yes	Potri.009G140300	protein_coding	chrChr09:11205266-11207534:+	gi|743792802|ref|XP_011045452.1|	2769	0	PREDICTED: serine/threonine-protein kinase CDG1-like isoform X1 [Populus euphratica]	gi|743792801|ref|XM_011047150.1|	1612	0	PREDICTED: Populus euphratica serine/threonine-protein kinase CDL1-like (LOC105140349), transcript variant X1, mRNA	Q8RXC8	213	2.00E-60	Receptor-like cytosolic serine/threonine-protein kinase RBK2	Cgl2127_1	89.4	3.00E-18	COG0515	pfam00069	Pkinase	Protein kinase domain.	.	GO:0005737|cytoplasm;GO:0005634|nucleus;	GO:0005524|ATP binding;GO:0051020|GTPase binding;GO:0004674|protein serine/threonine kinase activity;	.	.
Potri.004G233900.v3.0	76	109	92	62.03387499	25	27	34	3.603060066	1.849222703	9.82E-12	3.79E-11	up	yes	Potri.004G233900	protein_coding	chrChr04:23992214-23995447:-	gi|566168416|ref|XP_006385133.1|	2109	0	pectinacetylesterase family protein [Populus trichocarpa]	gi|566168415|ref|XM_006385071.1|	1630	0	Populus trichocarpa pectinacetylesterase family protein (POPTR_0004s24210g) mRNA, complete cds	Q9FH82	566	0	Pectin acetylesterase 11	.	.	.	.	pfam03283	PAE	Pectinacetylesterase.	GO:0071555|cell wall organization;	GO:0005618|cell wall;GO:0005829|cytosol;GO:0005576|extracellular region;GO:0009505|plant-type cell wall;GO:0005886|plasma membrane;GO:0009506|plasmodesma;	GO:0052793|pectin acetylesterase activity;	.	.
Potri.019G040200.v3.0	45	37	43	28.11634531	11	12	16	3.599894013	1.847954432	1.81E-06	4.96E-06	up	yes	Potri.019G040200	protein_coding	chrChr19:4597994-4599963:+	gi|566232958|ref|XP_002325439.2|	2214	0	hypothetical protein POPTR_0019s05670g [Populus trichocarpa]	gi|566232957|ref|XM_002325403.2|	1950	0	Populus trichocarpa hypothetical protein (POPTR_0019s05670g) mRNA, complete cds	Q9FKP1	449	3.00E-148	Cation/calcium exchanger 1	SPAC3A12.06c	81.3	4.00E-15	COG0530	pfam01699	Na_Ca_ex	Sodium/calcium exchanger protein. This is a family of sodium/calcium exchanger integral membrane proteins. This family covers the integral membrane regions of the proteins. Sodium/calcium exchangers regulate intracellular Ca2+ concentrations in many cells; cardiac myocytes, epithelial cells, neurons retinal rod photoreceptors and smooth muscle cells. Ca2+ is moved into or out of the cytosol depen…	GO:0006813|potassium ion transport;GO:0006814|sodium ion transport;	GO:0016021|integral component of membrane;GO:0005774|vacuolar membrane;	GO:0015297|antiporter activity;	K13754	SLC24A6, NCKX6; solute carrier family 24 (sodium/potassium/calcium exchanger), member 6
Potri.012G084800.v3.0	584	591	454	361.1992357	135	185	188	3.573363143	1.837282535	6.13E-60	9.46E-59	up	yes	Potri.012G084800	protein_coding	chrChr12:11220109-11224179:+	gi|224119412|ref|XP_002318065.1|	3391	0	ferric reductase-like transmembrane component family protein [Populus trichocarpa]	gi|743908698|ref|XM_011049508.1|	2636	0	PREDICTED: Populus euphratica ferric reduction oxidase 8, mitochondrial-like (LOC105142058), transcript variant X1, mRNA	Q8VY13	673	0	Ferric reduction oxidase 8, mitochondrial	.	.	.	.	pfam08022	FAD_binding_8	FAD-binding domain.	GO:0006811|ion transport;	GO:0016021|integral component of membrane;GO:0031966|mitochondrial membrane;GO:0005739|mitochondrion;GO:0005886|plasma membrane;	GO:0000293|ferric-chelate reductase activity;GO:0046872|metal ion binding;	.	.
Potri.016G119100.v3.0	36	44	26	23.28596749	8	14	11	3.572170138	1.836800796	1.11E-05	2.84E-05	up	yes	Potri.016G119100	protein_coding	chrChr16:12394360-12396625:-	gi|224140449|ref|XP_002323595.1|	2228	0	hypothetical protein POPTR_0016s12660g [Populus trichocarpa]	gi|566209959|ref|XM_002323559.2|	1606	0	Populus trichocarpa hypothetical protein (POPTR_0016s12660g) mRNA, complete cds	Q8LED3	578	0	Protein trichome birefringence-like 3	.	.	.	.	pfam13839	PC-Esterase	GDSL/SGNH-like Acyl-Esterase family found in Pmr5 and Cas1p. The PC-Esterase family is comprised of Cas1p, the Homo sapiens C7orf58, Arabidopsis thaliana PMR5 and a group of plant freezing resistance/coldacclimatization proteins typified by Arabidopsis thaliana ESKIMO1. animal FAM55D proteins, and animal FAM113 proteins. The PC-Esterase family has features that are both similar and different from…	GO:0030244|cellulose biosynthetic process;GO:0045489|pectin biosynthetic process;GO:0009827|plant-type cell wall modification;GO:0045492|xylan biosynthetic process;	GO:0005794|Golgi apparatus;GO:0000139|Golgi membrane;GO:0016021|integral component of membrane;GO:0005886|plasma membrane;	GO:1990538|xylan O-acetyltransferase activity;	.	.
Potri.016G013000.v3.0	1227	1355	917	773.1289446	277	414	404	3.55725292	1.830763553	1.45E-92	3.88E-91	up	yes	Potri.016G013000	protein_coding	chrChr16:718558-720180:-	.	.	.	.	gi|566208105|ref|XM_002323122.2|	986	0	Populus trichocarpa hypothetical protein (POPTR_0016s01450g) mRNA, complete cds	.	.	.	.	.	.	.	.	pfam00957	Synaptobrevin	Synaptobrevin.	.	.	.	.	.
Potri.014G026500.v3.0	397	495	372	281.1550763	89	141	170	3.549233163	1.827507354	3.01E-37	2.86E-36	up	yes	Potri.014G026500	protein_coding	chrChr14:2243999-2246871:+	gi|118487593|gb|ABK95622.1|	3927	0	unknown [Populus trichocarpa]	gi|118487592|gb|EF147612.1|	2683	0	Populus trichocarpa clone WS0123_M22 unknown mRNA	Q9FHA4	601	0	Subtilisin-like protease SBT1.9	BS_vpr	93.2	1.00E-18	COG1404	pfam00082	Peptidase_S8	Subtilase family. Subtilases are a family of serine proteases. They appear to have independently and convergently evolved an Asp/Ser/His catalytic triad, like that found in the trypsin serine proteases (see pfam00089). Structure is an alpha/beta fold containing a 7-stranded parallel beta sheet, order 2314567.	GO:0006508|proteolysis;	GO:0005618|cell wall;GO:0005576|extracellular region;	GO:0004252|serine-type endopeptidase activity;	.	.
Potri.T094200.v3.0	136	113	113	81.225962	33	43	39	3.522088549	1.816431181	2.35E-15	1.09E-14	up	yes	Potri.T094200	protein_coding	chrscaffold_126:44258-48905:-	gi|764120813|gb|AJR20992.1|	577	1.00E-77	thaumatin-like protein/pathogenesis related protein-5 [Populus szechuanica]	gi|566215162|ref|XM_006372035.1|	754	0	Populus trichocarpa hypothetical protein (POPTR_0018s10480g) mRNA, complete cds	P12670	162	1.00E-72	Protein NP24	.	.	.	.	pfam00314	Thaumatin	Thaumatin family.	GO:0050832|defense response to fungus;GO:0031640|killing of cells of other organism;	GO:0005737|cytoplasm;	.	.	.
Potri.017G059100.v3.0	1330	1268	1001	801.4662984	335	404	396	3.519118018	1.815213898	2.09E-104	6.60E-103	up	yes	Potri.017G059100	protein_coding	chrChr17:5411272-5413433:-	gi|743897759|ref|XP_011042175.1|	2179	0	PREDICTED: UDP-glucuronate 4-epimerase 6-like [Populus euphratica]	gi|743897758|ref|XM_011043873.1|	1504	0	PREDICTED: Populus euphratica UDP-glucuronate 4-epimerase 6-like (LOC105137922), mRNA	Q9LIS3	703	0	UDP-glucuronate 4-epimerase 6	.	.	.	.	pfam01370	Epimerase	NAD dependent epimerase/dehydratase family. This family of proteins utilize NAD as a cofactor. The proteins in this family use nucleotide-sugar substrates for a variety of chemical reactions.	GO:0005975|carbohydrate metabolic process;GO:0050832|defense response to fungus;GO:0050829|defense response to Gram-negative bacterium;GO:0033481|galacturonate biosynthetic process;	GO:0005768|endosome;GO:0005794|Golgi apparatus;GO:0032580|Golgi cisterna membrane;GO:0016021|integral component of membrane;GO:0005802|trans-Golgi network;	GO:0050378|UDP-glucuronate 4-epimerase activity;	K08679	E5.1.3.6; UDP-glucuronate 4-epimerase [EC:5.1.3.6]
Potri.008G198600.v3.0	853	876	634	525.4880432	222	282	244	3.501532941	1.80798666	7.06E-75	1.45E-73	up	yes	Potri.008G198600	protein_coding	chrChr08:13879327-13880973:-	gi|224102557|ref|XP_002312724.1|	711	4.00E-89	hypothetical protein POPTR_0008s20300g [Populus trichocarpa]	gi|166064091|gb|AC216847.1|	999	0	Populus trichocarpa clone POP104-B04, complete sequence	Q9ZS91	221	4.00E-68	Peptide methionine sulfoxide reductase B5	SPBC216.04c	140	2.00E-38	COG0229	pfam01641	SelR	SelR domain. Methionine sulfoxide reduction is an important process, by which cells regulate biological processes and cope with oxidative stress. MsrA, a protein involved in the reduction of methionine sulfoxides in proteins, has been known for four decades and has been extensively characterized with respect to structure and function. However, recent studies revealed that MsrA is only specific fo…	GO:0030091|protein repair;GO:0006979|response to oxidative stress;	GO:0005829|cytosol;	GO:0046872|metal ion binding;GO:0033743|peptide-methionine (R)-S-oxide reductase activity;	K07305	msrB; peptide-methionine (R)-S-oxide reductase [EC:1.8.4.12]
Potri.003G032600.v3.0	57	36	42	30.39071723	13	12	18	3.499373193	1.80709653	1.92E-06	5.26E-06	up	yes	Potri.003G032600	protein_coding	chrChr03:4081151-4083656:-	gi|743935945|ref|XP_011012352.1|	1733	0	PREDICTED: glucan endo-1,3-beta-glucosidase 14-like [Populus euphratica]	gi|743928486|ref|XM_011010149.1|	1321	0	PREDICTED: Populus euphratica glucan endo-1,3-beta-glucosidase 14-like (LOC105113819), mRNA	Q9ZQG9	339	4.00E-110	Glucan endo-1,3-beta-glucosidase 14	.	.	.	.	pfam00332	Glyco_hydro_17	Glycosyl hydrolases family 17.	GO:0005975|carbohydrate metabolic process;GO:0071555|cell wall organization;GO:0006952|defense response;	GO:0046658|anchored component of plasma membrane;GO:0005618|cell wall;GO:0005737|cytoplasm;GO:0005576|extracellular region;GO:0005634|nucleus;	GO:0042973|glucan endo-1,3-beta-D-glucosidase activity;GO:0004553|hydrolase activity, hydrolyzing O-glycosyl compounds;GO:0030247|polysaccharide binding;	.	.
Potri.018G009300.v3.0	992	931	781	604.2822729	239	298	325	3.495636657	1.805555236	4.89E-82	1.11E-80	up	yes	Potri.018G009300	protein_coding	chrChr18:644705-648725:-	gi|429326484|gb|AFZ78582.1|	3311	0	cellulose synthase-like protein [Populus tomentosa]	gi|743903264|ref|XM_011046673.1|	2810	0	PREDICTED: Populus euphratica probable xyloglucan glycosyltransferase 5 (LOC105140018), transcript variant X1, mRNA	Q9SB75	1078	0	Probable xyloglucan glycosyltransferase 5	aq_1407	95.9	3.00E-19	COG1215	pfam13641	Glyco_tranf_2_3	Glycosyltransferase like family 2. Members of this family of prokaryotic proteins include putative glucosyltransferase, which are involved in bacterial capsule biosynthesis.	GO:0071555|cell wall organization;	GO:0000139|Golgi membrane;GO:0016021|integral component of membrane;GO:0005634|nucleus;	GO:0016757|transferase activity, transferring glycosyl groups;	.	.
Potri.004G042000.v3.0	8	9	11	6.415931668	3	2	4	3.492083164	1.804087917	0.023323323	0.040313938	up	yes	Potri.004G042000	protein_coding	chrChr04:3200204-3202447:-	gi|224079239|ref|XP_002305805.1|	966	4.00E-117	DNA mismatch repair MutS family protein [Populus trichocarpa]	gi|224079238|ref|XM_002305769.1|	467	0	Populus trichocarpa DNA mismatch repair MutS family protein (POPTR_0004s04200g) mRNA, complete cds	.	.	.	.	.	.	.	.	pfam00305	Lipoxygenase	Lipoxygenase.	.	.	.	.	.
Potri.001G049700.v3.0	376	400	289	236.9267388	89	127	124	3.488189281	1.802478328	3.97E-40	4.04E-39	up	yes	Potri.001G049700	protein_coding	chrChr01:3781406-3782606:-	gi|743874609|ref|XP_011034711.1|	459	3.00E-52	PREDICTED: CLAVATA3/ESR (CLE)-related protein TDIF-like [Populus euphratica]	gi|566148953|ref|XM_002299239.2|	1021	0	Populus trichocarpa hypothetical protein (POPTR_0001s14510g) mRNA, complete cds	.	.	.	.	.	.	.	.	pfam11778	SID	Septation initiation. This family is required for activation of the spg1 GTPase signalling cascade which leads to the initiation of septation and the subsequent termination of mitosis. It may act as a scaffold at the spindle pole body to which other components of the spg1 signalling cascade attach in pombe. In S.cerevisiae it is both required for the proper formation of the spindle pole body oute…	.	.	.	.	.
Potri.001G058500.v3.0	23	29	25	17.27792891	5	11	9	3.485646863	1.801426415	0.000197021	0.000449383	up	yes	Potri.001G058500	protein_coding	chrChr01:4471426-4472137:-	gi|224057776|ref|XP_002299318.1|	510	2.00E-62	hypothetical protein POPTR_0001s13640g [Populus trichocarpa]	gi|566148789|ref|XM_002299282.2|	568	0	Populus trichocarpa hypothetical protein (POPTR_0001s13640g) mRNA, complete cds	.	.	.	.	.	.	.	.	pfam07880	T4_gp9_10	Bacteriophage T4 gp9/10-like protein. The members of this family are similar to gene products 9 (gp9) and 10 (gp10) of bacteriophage T4. Both proteins are components of the viral baseplate. Gp9 connects the long tail fibres of the virus to the baseplate and triggers tail contraction after viral attachment to a host cell. The protein is active as a trimer, with each monomer being composed of three…	.	.	.	.	.
Potri.018G008300.v3.0	92	83	63	53.08983118	24	27	25	3.464323085	1.792573483	1.07E-10	3.89E-10	up	yes	Potri.018G008300	protein_coding	chrChr18:575963-577515:-	gi|224142075|ref|XP_002324384.1|	2021	0	hypothetical protein POPTR_0018s03470g [Populus trichocarpa]	gi|566214022|ref|XM_002324348.2|	1392	0	Populus trichocarpa hypothetical protein (POPTR_0018s03470g) mRNA, complete cds	.	.	.	.	.	.	.	.	pfam06880	DUF1262	Protein of unknown function (DUF1262). This family represents a conserved region within a number of proteins of unknown function that seem to be specific to Arabidopsis thaliana. Note that some family members contain more than one copy of this region.	.	.	.	.	.
Potri.009G073600.v3.0	97	79	86	59.19432354	24	35	26	3.463636306	1.79228745	2.95E-11	1.11E-10	up	yes	Potri.009G073600	protein_coding	chrChr09:7197974-7200683:+	gi|566186839|ref|XP_002313983.2|	1946	0	hypothetical protein POPTR_0009s07770g [Populus trichocarpa]	gi|566186838|ref|XM_002313947.2|	1555	0	Populus trichocarpa hypothetical protein (POPTR_0009s07770g) mRNA, complete cds	Q9LI74	257	4.00E-73	Protein CHUP1, chloroplastic	.	.	.	.	pfam10211	Ax_dynein_light	Axonemal dynein light chain. Axonemal dynein light chain proteins play a dynamic role in flagellar and cilia motility. Eukaryotic cilia and flagella are complex organelles consisting of a core structure, the axoneme, which is composed of nine microtubule doublets forming a cylinder that surrounds a pair of central singlet microtubules. This ultra-structural arrangement seems to be one of the most…	GO:0009902|chloroplast relocation;	GO:0009507|chloroplast;GO:0009707|chloroplast outer membrane;	.	.	.
Potri.004G054900.v3.0	77	82	63	50.01231489	36	17	16	3.456553512	1.789334261	6.16E-08	1.89E-07	up	yes	Potri.004G054900	protein_coding	chrChr04:4334382-4338765:+	gi|566165070|ref|XP_002305749.2|	1400	0	hypothetical protein POPTR_0004s05410g [Populus trichocarpa]	gi|566165069|ref|XM_002305713.2|	1773	0	Populus trichocarpa hypothetical protein (POPTR_0004s05410g) mRNA, complete cds	Q9LI74	314	7.00E-93	Protein CHUP1, chloroplastic	.	.	.	.	pfam03091	CutA1	CutA1 divalent ion tolerance protein. Several gene loci with a possible involvement in cellular tolerance to copper have been identified. One such locus in eubacteria and archaebacteria, cutA, is thought to be involved in cellular tolerance to a wide variety of divalent cations other than copper. The cutA locus consists of two operons, of one and two genes. The CutA1 protein is a cytoplasmic prot…	GO:0009902|chloroplast relocation;	GO:0009507|chloroplast;GO:0009707|chloroplast outer membrane;	.	.	.
Potri.016G001600.v3.0	116	126	105	78.0990947	35	37	40	3.445171586	1.784575838	9.14E-15	4.13E-14	up	yes	Potri.016G001600	protein_coding	chrChr16:76264-77844:-	gi|566207887|ref|XP_006373555.1|	868	2.00E-111	hypothetical protein POPTR_0016s00350g [Populus trichocarpa]	gi|566207886|ref|XM_006373493.1|	1059	0	Populus trichocarpa hypothetical protein (POPTR_0016s00350g) mRNA, complete cds	O49603	82	2.00E-16	Cell wall / vacuolar inhibitor of fructosidase 2	.	.	.	.	pfam04043	PMEI	Plant invertase/pectin methylesterase inhibitor. This domain inhibits pectin methylesterases (PMEs) and invertases through formation of a non-covalent 1:1 complex. It has been implicated in the regulation of fruit development, carbohydrate metabolizm and cell wall extension. It may also be involved in inhibiting microbial pathogen PMEs. It has been observed that it is often expressed as a large i…	GO:0043086|negative regulation of catalytic activity;GO:0080167|response to karrikin;	GO:0005773|vacuole;	GO:0004857|enzyme inhibitor activity;	.	.
Potri.009G006600.v3.0	764	814	646	500.2892711	211	270	248	3.397170872	1.764333785	3.16E-73	6.26E-72	up	yes	Potri.009G006600	protein_coding	chrChr09:1214435-1216722:-	gi|566185716|ref|XP_002313534.2|	1351	0	xyloglucan endotransglucosylase/hydrolase protein 31 precursor [Populus trichocarpa]	gi|566185715|ref|XM_002313498.2|	1285	0	Populus trichocarpa xyloglucan endotransglucosylase/hydrolase protein 31 precursor (POPTR_0009s01210g) mRNA, complete cds	P93046	407	6.00E-138	Xyloglucan endotransglucosylase/hydrolase protein 31	YGR189c	57.4	6.00E-08	COG2273	pfam00722	Glyco_hydro_16	Glycosyl hydrolases family 16.	GO:0042546|cell wall biogenesis;GO:0016998|cell wall macromolecule catabolic process;GO:0071555|cell wall organization;GO:0010411|xyloglucan metabolic process;	GO:0048046|apoplast;GO:0005618|cell wall;GO:0005886|plasma membrane;	GO:0033946|xyloglucan-specific endo-beta-1,4-glucanase activity;GO:0016762|xyloglucan:xyloglucosyl transferase activity;	K08235	E2.4.1.207; xyloglucan:xyloglucosyl transferase [EC:2.4.1.207]
Potri.001G041700.v3.0	501	466	378	301.7082011	105	180	160	3.387055189	1.760031495	1.24E-44	1.41E-43	up	yes	Potri.001G041700	protein_coding	chrChr01:3033316-3035921:-	gi|224053042|ref|XP_002297678.1|	2381	0	aspartyl protease family protein [Populus trichocarpa]	gi|566146976|ref|XM_002297642.2|	1954	0	Populus trichocarpa aspartyl protease family protein (POPTR_0001s03320g) mRNA, complete cds	Q8S9J6	276	8.00E-83	Aspartyl protease family protein At5g10770	.	.	.	.	pfam14541	TAXi_C	Xylanase inhibitor C-terminal. The N- and C-termini of the members of this family are jointly necessary for creating the catalytic pocket necessary for cleaving xylasnase. Phytopathogens produce xylanase that destroys plant cells, so its destruction through proteolysis is vital for plant-survival.	GO:0030163|protein catabolic process;GO:0006508|proteolysis;	GO:0031225|anchored component of membrane;GO:0005886|plasma membrane;	GO:0004190|aspartic-type endopeptidase activity;	.	.
Potri.001G047800.v3.0	51	50	19	26.33962364	15	10	13	3.381971539	1.757864519	3.44E-05	8.46E-05	up	yes	Potri.001G047800	protein_coding	chrChr01:3540088-3542362:+	gi|224053402|ref|XP_002297801.1|	988	3.00E-130	hypothetical protein POPTR_0001s14750g [Populus trichocarpa]	gi|224053401|ref|XM_002297765.1|	1071	0	Populus trichocarpa hypothetical protein (POPTR_0001s14750g) mRNA, complete cds	Q93VG8	194	3.00E-57	DeSI-like protein At4g17486	.	.	.	.	pfam05903	Peptidase_C97	PPPDE putative peptidase domain. The PPPDE superfamily (after Permuted Papain fold Peptidases of DsRNA viruses and Eukaryotes), consists of predicted thiol peptidases with a circularly permuted papain-like fold. The inference of the likely DUB function of the PPPDE superfamily proteins is based on the fusions of the catalytic domain to Ub-binding PUG (PUB)/UBA domains and a novel alpha-helical Ub…	.	.	GO:0008233|peptidase activity;	.	.
Potri.007G042900.v3.0	11	10	19	9.313289499	1	6	7	3.372183331	1.753682972	0.011460767	0.020835897	up	yes	Potri.007G042900	protein_coding	chrChr07:3673748-3674736:-	gi|566180717|ref|XP_002310148.2|	1051	1.00E-141	hypothetical protein POPTR_0007s11130g [Populus trichocarpa]	gi|164565497|gb|AC216469.1|	989	0	Populus trichocarpa clone POP036-C22, complete sequence	Q9ZQE6	169	1.00E-49	Calmodulin-like protein 1	SPAC3A12.14	103	9.00E-26	COG5126	pfam13499	EF-hand_7	EF-hand domain pair.	.	GO:0005739|mitochondrion;	GO:0005509|calcium ion binding;	K13448	CML; calcium-binding protein CML
Potri.007G098500.v3.0	122	118	97	75.80167717	27	43	42	3.368770811	1.75222228	3.50E-14	1.53E-13	up	yes	Potri.007G098500	protein_coding	chrChr07:12465888-12471953:+	gi|224096133|ref|XP_002310544.1|	3039	0	hypothetical protein POPTR_0007s04870g [Populus trichocarpa]	gi|566179647|ref|XM_002310508.2|	2394	0	Populus trichocarpa hypothetical protein (POPTR_0007s04870g) mRNA, complete cds	Q8LLE5	355	1.00E-109	Filament-like plant protein (Fragment)	.	.	.	.	pfam05911	DUF869	Plant protein of unknown function (DUF869). This family consists of a number of sequences found in Arabidopsis thaliana, Oryza sativa and Lycopersicon esculentum (Tomato). The function of this family is unknown.	.	GO:0016021|integral component of membrane;	.	.	.
Potri.005G184700.v3.0	949	843	688	557.4287577	226	328	267	3.366924011	1.751431161	2.86E-69	5.28E-68	up	yes	Potri.005G184700	protein_coding	chrChr05:20166993-20169401:+	gi|566172392|ref|XP_006383601.1|	1248	1.00E-167	hypothetical protein POPTR_0005s20690g [Populus trichocarpa]	gi|566172391|ref|XM_006383539.1|	1554	0	Populus trichocarpa hypothetical protein (POPTR_0005s20690g) mRNA, complete cds	Q94AQ9	260	6.00E-81	Protein STAY-GREEN LIKE, chloroplastic	.	.	.	.	pfam12638	Staygreen	Staygreen protein. This family of proteins have been implicated in chlorophyll degradation. Intriguingly members of this family are also found in non-photosynthetic bacteria.	GO:0009658|chloroplast organization;	GO:0009507|chloroplast;	.	.	.
Potri.006G258700.v3.0	319	248	186	168.0545795	62	102	85	3.366267798	1.751149952	8.78E-24	5.69E-23	up	yes	Potri.006G258700	protein_coding	chrChr06:26241047-26246393:-	gi|566178436|ref|XP_006382091.1|	2569	0	hypothetical protein POPTR_0006s27490g [Populus trichocarpa]	gi|566178435|ref|XM_006382029.1|	1964	0	Populus trichocarpa hypothetical protein (POPTR_0006s27490g) mRNA, complete cds	.	.	.	.	.	.	.	.	pfam11700	ATG22	Vacuole effluxer Atg22 like. Autophagy is a major survival survival mechanism in which eukaryotes recycle cellular nutrients during stress conditions. Atg22, Avt3 and Avt4 are partially redundant vacuolar effluxes, which mediate the efflux of leucine and other amino acids resulting from autophagy. This family also includes other transporter proteins.	.	.	.	.	.
Potri.014G012800.v3.0	622	691	541	418.0088945	168	242	207	3.35568258	1.746606255	1.31E-60	2.05E-59	up	yes	Potri.014G012800	protein_coding	chrChr14:1330790-1334712:+	gi|743912082|ref|XP_010999912.1|	2824	0	PREDICTED: growth-regulating factor 1-like [Populus euphratica]	gi|743942564|ref|XM_011017476.1|	2124	0	PREDICTED: Populus euphratica growth-regulating factor 1-like (LOC105119348), mRNA	Q6AWY3	331	6.00E-101	Growth-regulating factor 6	.	.	.	.	pfam08879	WRC	WRC. The WRC domain, named after the conserved Trp-Arg-Cys motif, contains two distinctive features: a putative nuclear localisation signal and a zinc-finger motif (C3H). It is suggested that the WRC domain functions in DNA binding.	GO:0032502|developmental process;GO:0006355|regulation of transcription, DNA-templated;GO:0006351|transcription, DNA-templated;	GO:0005634|nucleus;	GO:0005524|ATP binding;	.	.
Potri.014G122200.v3.0	76	84	62	49.84964928	17	27	30	3.355038254	1.746329216	8.47E-10	2.91E-09	up	yes	Potri.014G122200	protein_coding	chrChr14:9455916-9460246:+	gi|743791469|ref|XP_011041424.1|	3887	0	PREDICTED: probable beta-D-xylosidase 2 [Populus euphratica]	gi|566203825|ref|XM_002320274.2|	2499	0	Populus trichocarpa hypothetical protein (POPTR_0014s11730g) mRNA, complete cds	Q94KD8	1151	0	Probable beta-D-xylosidase 2	XF0845	272	8.00E-77	COG1472	pfam00933	Glyco_hydro_3	Glycosyl hydrolase family 3 N terminal domain.	GO:0031222|arabinan catabolic process;GO:0045493|xylan catabolic process;	GO:0009505|plant-type cell wall;GO:0005578|proteinaceous extracellular matrix;	GO:0046556|alpha-L-arabinofuranosidase activity;GO:0009044|xylan 1,4-beta-xylosidase activity;	.	.
Potri.010G108100.v3.0	87	128	93	69.47058382	24	36	43	3.353097246	1.745494324	7.04E-12	2.74E-11	up	yes	Potri.010G108100	protein_coding	chrChr10:12753097-12755926:-	gi|566190339|ref|XP_002315861.2|	1117	2.00E-147	33 kDa secretory family protein [Populus trichocarpa]	gi|566190338|ref|XM_002315825.2|	1521	0	Populus trichocarpa 33 kDa secretory family protein (POPTR_0010s11840g) mRNA, complete cds	Q9ZU94	265	8.00E-83	Cysteine-rich repeat secretory protein 12	.	.	.	.	pfam01657	Stress-antifung	Salt stress response/antifungal. This domain is often found in association with the kinase domains pfam00069 or pfam07714. In many proteins it is duplicated. It contains six conserved cysteines which are involved in disulphide bridges. It has a role in salt stress response and has antifungal activity.	GO:0006810|transport;GO:0016032|viral process;	GO:0016021|integral component of membrane;GO:0009506|plasmodesma;	.	.	.
[truncated: 410 more rows]
