# Supplementary material for: Overexpression Levels of LbDREB6 Differentially Affect Growth, Drought, and Disease Tolerance in Poplar
Source: Front Plant Sci. 2020 Nov 11;11:528550. doi: 10.3389/fpls.2020.528550 (PMC7693672; doi:10.3389/fpls.2020.528550)
Supplement: Supplementary Data 4 — Genes related to disease tolerance in OE18 line compared to the WT and OE14 lines. [file Table_4.XLS]

## Sheet: Sheet1
#ID	A1_Count	A2_Count	A3_Count	C1_Count	C2_Count	C3_Count	A1_FPKM	A2_FPKM	A3_FPKM	C1_FPKM	C2_FPKM	C3_FPKM	FDR	log2FC	regulated	COG_class	COG_class_annotation	GO_annotation	KEGG_annotation	KOG_class	KOG_class_annotation	Swissprot_annotation	nr_annotation
Potri.005G041800.v3.0	16	31	15	0	0	0	1.47638	2.75945	1.39315	0	0	0	1.78e-06	#NAME?	down	--	--	--	--	--	--	putative disease resistance gene NBS-LRR family protein	PREDICTED: probable disease resistance protein At4g27220 [Populus euphratica]
Potri.017G152200.v3.0	85	62	71	0	0	0	2.30625	1.66003	1.91509	0	0	0	1.66e-26	#NAME?	down	[S]	Function unknown	Molecular Function: nucleotide binding (GO:0000166);; Biological Process: immune response-regulating signaling pathway (GO:0002764);; Molecular Function: protein kinase activity (GO:0004672);; Molecular Function: protein serine/threonine kinase activity (GO:0004674);; Molecular Function: protein binding (GO:0005515);; Cellular Component: plasma membrane (GO:0005886);; Biological Process: polysacc…	--	--	--	Probable LRR receptor-like serine/threonine-protein kinase At3g47570 (Precursor) GN=At3g47570 OS=Arabidopsis thaliana (Mouse-ear cress) PE=2 SV=1	hypothetical protein POPTR_0017s03350g [Populus trichocarpa]
Potri.009G101600.v3.0	89	81	69	1	0	0	5.78016	5.31431	4.472	0.0822168	0	0	3.71e-27	-7.9044	down	[P]	Inorganic ion transport and metabolism	Cellular Component: mitochondrion (GO:0005739);; Cellular Component: cytosol (GO:0005829);; Cellular Component: chloroplast stroma (GO:0009570);; Biological Process: response to nitrate (GO:0010167);; Biological Process: nitrate transport (GO:0015706);; Cellular Component: membrane (GO:0016020);; Biological Process: cysteine biosynthetic process (GO:0019344);; Molecular Function: heme binding (GO…	K00366|0|pop:POPTR_0009s10440g|hypothetical protein; K00366 ferredoxin-nitrite reductase [EC:1.7.7.1] (A)	[P]	Inorganic ion transport and metabolism	Ferredoxin--nitrite reductase, chloroplastic (Precursor) GN=NIR1 OS=Betula pendula (European white birch) PE=2 SV=1	hypothetical protein POPTR_0009s10440g, partial [Populus trichocarpa]
Potri.017G152400.v3.0	491	464	552	1	5	3	12.8906	12.0738	14.2696	0.0405415	0.138676	0.128847	5.27e-126	-7.39418	down	[RTKL]	--	Biological Process: immune response-regulating signaling pathway (GO:0002764);; Molecular Function: protein binding (GO:0005515);; Cellular Component: plasma membrane (GO:0005886);; Biological Process: polysaccharide metabolic process (GO:0005976);; Biological Process: metabolic process (GO:0008152);; Biological Process: epidermis development (GO:0008544);; Biological Process: plant-type hypersen…	--	--	--	Probable LRR receptor-like serine/threonine-protein kinase At3g47570 (Precursor) GN=At3g47570 OS=Arabidopsis thaliana (Mouse-ear cress) PE=2 SV=1	hypothetical protein POPTR_0017s03350g [Populus trichocarpa]
Potri.017G151400.v3.0	69	61	88	0	2	0	1.8825	1.65301	2.39213	0	0.0587386	0	6.01e-24	-6.77621	down	[S]	Function unknown	Molecular Function: nucleotide binding (GO:0000166);; Biological Process: immune response-regulating signaling pathway (GO:0002764);; Molecular Function: protein kinase activity (GO:0004672);; Molecular Function: protein binding (GO:0005515);; Cellular Component: plasma membrane (GO:0005886);; Biological Process: starch metabolic process (GO:0005982);; Biological Process: epidermis development (G…	--	--	--	Probable LRR receptor-like serine/threonine-protein kinase At3g47570 (Precursor) GN=At3g47570 OS=Arabidopsis thaliana (Mouse-ear cress) PE=2 SV=1	hypothetical protein POPTR_0017s03350g [Populus trichocarpa]
Populus_trichocarpa_newGene_474	156	158	151	2	2	1	9.68793	9.75131	9.28462	0.132632	0.133338	0.0637806	4.1e-44	-6.54482	down	[P]	Inorganic ion transport and metabolism	Biological Process: nitrogen compound metabolic process (GO:0006807);; Cellular Component: chloroplast (GO:0009507);; Molecular Function: heme binding (GO:0020037);; Biological Process: oxoacid metabolic process (GO:0043436);; Molecular Function: ferredoxin-nitrite reductase activity (GO:0048307);; Molecular Function: iron-sulfur cluster binding (GO:0051536);; Biological Process: oxidation-reduct…	K00366|1.92986e-75|sot:102596437|ferredoxin--nitrite reductase, chloroplastic-like; K00366 ferredoxin-nitrite reductase [EC:1.7.7.1] (A)	--	--	Ferredoxin--nitrite reductase, chloroplastic (Precursor) GN=NIR OS=Spinacia oleracea (Spinach) PE=1 SV=1	PREDICTED: ferredoxin--nitrite reductase, chloroplastic [Sesamum indicum]
Potri.005G041300.v3.0	36	23	29	0	1	0	0.509242	0.329764	0.410166	0	0.0150943	0	3.26e-11	-6.46707	down	--	--	Molecular Function: nucleotide binding (GO:0000166);;	--	[T]	Signal transduction mechanisms	putative disease resistance gene NBS-LRR family protein	PREDICTED: probable disease resistance protein At4g27220 [Populus euphratica]
Potri.001G043800.v3.0	21	26	24	0	1	0	0.807701	1.01265	0.916184	0	0.0410297	0	3.19e-09	-6.15764	down	[S]	Function unknown	Molecular Function: protein binding (GO:0005515);; Cellular Component: cytoplasm (GO:0005737);; Biological Process: ion transport (GO:0006811);; Biological Process: defense response (GO:0006952);; Biological Process: pattern specification process (GO:0007389);; Biological Process: epidermis development (GO:0008544);; Biological Process: response to bacterium (GO:0009617);; Biological Process: hor…	--	[R]	General function prediction only	Receptor-like protein 12 (Precursor) GN=RLP12 OS=Arabidopsis thaliana (Mouse-ear cress) PE=2 SV=2	hypothetical protein POPTR_0001s03540g [Populus trichocarpa]
Potri.012G005600.v3.0	84	51	81	1	1	2	4.14939	2.82619	3.979	0.0764931	0.0770804	0.0692007	1.16e-17	-5.76045	down	[S]	Function unknown	Molecular Function: protein kinase activity (GO:0004672);; Molecular Function: protein binding (GO:0005515);; Biological Process: cellular glucan metabolic process (GO:0006073);; Biological Process: cellular protein modification process (GO:0006464);; Biological Process: anion transport (GO:0006820);; Biological Process: defense response (GO:0006952);; Biological Process: signal transduction (GO:…	--	[R]	General function prediction only	Receptor-like protein 12 (Precursor) GN=RLP12 OS=Arabidopsis thaliana (Mouse-ear cress) PE=2 SV=2	PREDICTED: receptor-like protein 12 [Populus euphratica]
Potri.012G009600.v3.0	42	31	66	3	0	3	2.02721	1.62208	3.20311	0.13111	0	0.128195	8.95e-07	-4.53896	down	[S]	Function unknown	Molecular Function: protein kinase activity (GO:0004672);; Molecular Function: protein binding (GO:0005515);; Biological Process: cellular glucan metabolic process (GO:0006073);; Biological Process: cellular protein modification process (GO:0006464);; Biological Process: ion transport (GO:0006811);; Biological Process: defense response (GO:0006952);; Biological Process: pattern specification proc…	--	[R]	General function prediction only	Receptor-like protein 12 (Precursor) GN=RLP12 OS=Arabidopsis thaliana (Mouse-ear cress) PE=2 SV=2	hypothetical protein POPTR_0012s00570g [Populus trichocarpa]
Potri.007G141000.v3.0	52	45	49	6	10	3	3.80705	3.2313	3.53469	0.460597	0.784321	0.22477	1.66e-08	-2.94799	down	[RTKL]	--	Biological Process: MAPK cascade (GO:0000165);; Biological Process: response to molecule of bacterial origin (GO:0002237);; Molecular Function: protein serine/threonine kinase activity (GO:0004674);; Molecular Function: calmodulin binding (GO:0005516);; Cellular Component: extracellular region (GO:0005576);; Cellular Component: plasma membrane (GO:0005886);; Biological Process: regulation of tran…	K04733|0|pop:POPTR_0007s00820g|POPTRDRAFT_871803; hypothetical protein; K04733 interleukin-1 receptor-associated kinase 4 [EC:2.7.11.1] (A)	[T]	Signal transduction mechanisms	Probable receptor-like protein kinase At5g39020 (Precursor) GN=At5g39020 OS=Arabidopsis thaliana (Mouse-ear cress) PE=2 SV=1	PREDICTED: probable receptor-like protein kinase At5g39020 isoform X7 [Populus euphratica]
Potri.001G052500.v3.0	24	22	11	4	3	1	0.586122	0.539734	0.276733	0.103087	0.078246	0.0249482	0.000384906	-2.8378	down	[S]	Function unknown	Biological Process: transition metal ion transport (GO:0000041);; Biological Process: response to molecule of bacterial origin (GO:0002237);; Molecular Function: protein serine/threonine kinase activity (GO:0004674);; Molecular Function: transmembrane receptor protein tyrosine kinase activity (GO:0004714);; Molecular Function: protein binding (GO:0005515);; Molecular Function: ATP binding (GO:000…	--	--	--	Receptor-like protein kinase 2 (Precursor) GN=RCH2 OS=Arabidopsis thaliana (Mouse-ear cress) PE=1 SV=1	leucine-rich repeat transmembrane protein kinase [Populus trichocarpa]
Potri.005G030800.v3.0	69	68	68	12	9	10	1.64705	1.60137	1.63901	0.280664	0.203444	0.214852	6.94e-10	-2.73071	down	[S]	Function unknown	Biological Process: polysaccharide biosynthetic process (GO:0000271);; Biological Process: immune response-regulating signaling pathway (GO:0002764);; Molecular Function: protein kinase activity (GO:0004672);; Molecular Function: protein serine/threonine kinase activity (GO:0004674);; Molecular Function: protein binding (GO:0005515);; Molecular Function: ATP binding (GO:0005524);; Cellular Compon…	--	--	--	Probable LRR receptor-like serine/threonine-protein kinase At3g47570 (Precursor) GN=At3g47570 OS=Arabidopsis thaliana (Mouse-ear cress) PE=2 SV=1	resistance family protein [Populus trichocarpa]
Potri.005G042000.v3.0	66	88	111	23	10	11	1.99086	2.55928	3.19483	0.738145	0.34074	0.361515	5.7e-08	-2.59588	down	--	--	--	--	--	--	Disease resistance protein RPS2 GN=RPS2 OS=Arabidopsis thaliana (Mouse-ear cress) PE=1 SV=1	PREDICTED: probable disease resistance protein At4g27220 [Populus euphratica]
Potri.008G024400.v3.0	28	27	50	5	9	6	0.422851	0.413975	0.749036	0.0797393	0.145309	0.0924784	0.000852351	-2.39888	down	[V]	Defense mechanisms	Molecular Function: ATP binding (GO:0005524);; Cellular Component: mitochondrion (GO:0005739);; Cellular Component: vacuolar membrane (GO:0005774);; Cellular Component: cytosol (GO:0005829);; Cellular Component: plasma membrane (GO:0005886);; Biological Process: ATP catabolic process (GO:0006200);; Biological Process: protein targeting to membrane (GO:0006612);; Biological Process: drug transmemb…	--	[Q]	Secondary metabolites biosynthesis, transport and catabolism	Pleiotropic drug resistance protein 2 GN=PDR2 OS=Nicotiana plumbaginifolia (Leadwort-leaved tobacco) PE=2 SV=1	hypothetical protein POPTR_0008s02480g [Populus trichocarpa]
Potri.T154200.v3.0	33	30	30	5	4	9	1.31011	1.58285	1.31976	0.331512	0.267701	0.515691	0.000104043	-2.37461	down	--	--	Molecular Function: DNA binding (GO:0003677);; Molecular Function: protein binding (GO:0005515);; Molecular Function: ATP binding (GO:0005524);; Cellular Component: mitochondrion (GO:0005739);; Biological Process: regulation of transcription, DNA-templated (GO:0006355);; Biological Process: defense response (GO:0006952);; Biological Process: signal transduction (GO:0007165);; Cellular Component: …	--	--	--	TMV resistance protein N GN=N OS=Nicotiana glutinosa (Tobacco) PE=1 SV=1	TIR-NBS-NBS-LRR type disease resistance protein [Populus trichocarpa]
Potri.013G097900.v3.0	211	261	228	62	55	40	13.7689	16.0266	13.9641	4.06597	3.24991	2.50872	5.28e-19	-2.16221	down	[S]	Function unknown	Molecular Function: binding (GO:0005488);; Molecular Function: ATP binding (GO:0005524);; Cellular Component: mitochondrion (GO:0005739);; Biological Process: defense response (GO:0006952);; Biological Process: signal transduction (GO:0007165);; Cellular Component: plasmodesma (GO:0009506);; Cellular Component: chloroplast (GO:0009507);; Molecular Function: nucleoside-triphosphatase activity (GO:…	--	--	--	TMV resistance protein N GN=N OS=Nicotiana glutinosa (Tobacco) PE=1 SV=1	PREDICTED: TMV resistance protein N-like isoform X1 [Populus euphratica]
Potri.003G179500.v3.0	221	278	235	61	57	56	9.98746	12.8675	10.7032	2.72116	2.53437	2.64662	1.12e-18	-2.08231	down	[RTKL]	--	Biological Process: activation of MAPKK activity (GO:0000186);; Biological Process: RNA splicing, via endonucleolytic cleavage and ligation (GO:0000394);; Molecular Function: protein serine/threonine kinase activity (GO:0004674);; Molecular Function: MAP kinase kinase kinase activity (GO:0004709);; Molecular Function: ATP binding (GO:0005524);; Cellular Component: plasma membrane (GO:0005886);; B…	--	[T]	Signal transduction mechanisms	Probable receptor-like protein kinase At1g80640 (Precursor) GN=At1g80640 OS=Arabidopsis thaliana (Mouse-ear cress) PE=2 SV=1	hypothetical protein POPTR_0003s17790g [Populus trichocarpa]
Potri.002G242700.v3.0	125	164	157	31	37	46	2.84814	3.74113	3.57843	0.738696	0.894037	1.13743	2.83e-11	-1.97388	down	[RTKL]	--	Biological Process: activation of MAPKK activity (GO:0000186);; Molecular Function: MAP kinase kinase kinase activity (GO:0004709);; Molecular Function: ATP binding (GO:0005524);; Cellular Component: plasma membrane (GO:0005886);; Biological Process: cellular aromatic compound metabolic process (GO:0006725);; Biological Process: cation transport (GO:0006812);; Biological Process: anion transport …	--	--	--	Probable LRR receptor-like serine/threonine-protein kinase At5g48740 (Precursor) GN=At5g48740 OS=Arabidopsis thaliana (Mouse-ear cress) PE=2 SV=1	hypothetical protein POPTR_0002s24420g [Populus trichocarpa]
Potri.T003600.v3.0	123	112	111	46	41	5	3.28855	2.92163	2.92079	1.27319	1.12834	0.145391	9.14e-09	-1.91662	down	[S]	Function unknown	Molecular Function: purine ribonucleoside binding (GO:0032550);; Molecular Function: adenyl ribonucleotide binding (GO:0032559);; Molecular Function: anion binding (GO:0043168);;	K13459|0|pop:POPTR_0019s01100g|hypothetical protein; K13459 disease resistance protein RPS2 (A)	[T]	Signal transduction mechanisms	putative disease resistance gene NBS-LRR family protein	hypothetical protein POPTR_0019s01100g [Populus trichocarpa]
Potri.005G080000.v3.0	159	246	199	50	53	58	4.2459	6.50856	5.27904	1.33061	1.40151	1.57407	1.28e-08	-1.91328	down	[S]	Function unknown	Molecular Function: nucleotide binding (GO:0000166);; Biological Process: immune response-regulating signaling pathway (GO:0002764);; Molecular Function: protein kinase activity (GO:0004672);; Molecular Function: protein serine/threonine kinase activity (GO:0004674);; Molecular Function: protein binding (GO:0005515);; Cellular Component: plasma membrane (GO:0005886);; Biological Process: starch m…	--	--	--	Probable LRR receptor-like serine/threonine-protein kinase At3g47570 (Precursor) GN=At3g47570 OS=Arabidopsis thaliana (Mouse-ear cress) PE=2 SV=1	hypothetical protein POPTR_0005s08180g [Populus trichocarpa]
Potri.002G070900.v3.0	297	449	395	80	121	114	7.0785	10.6583	9.39474	1.90871	2.88848	2.7451	5.79e-09	-1.86294	down	[S]	Function unknown	Biological Process: transition metal ion transport (GO:0000041);; Molecular Function: nucleotide binding (GO:0000166);; Biological Process: response to molecule of bacterial origin (GO:0002237);; Molecular Function: protein kinase activity (GO:0004672);; Molecular Function: protein serine/threonine kinase activity (GO:0004674);; Molecular Function: protein binding (GO:0005515);; Molecular Functio…	--	--	--	Receptor-like protein kinase 2 (Precursor) GN=RCH2 OS=Arabidopsis thaliana (Mouse-ear cress) PE=1 SV=1	hypothetical protein POPTR_0002s07170g [Populus trichocarpa]
Potri.012G118600.v3.0	83	71	70	25	15	26	1.9759	1.66984	1.64857	0.61063	0.360303	0.636295	1.08e-05	-1.76813	down	--	--	--	--	--	--	Putative E3 ubiquitin-protein ligase LIN-2 {ECO:0000303|PubMed:19776163} OS=Lotus japonicus (Lotus corniculatus var. japonicus) PE=1 SV=1	hypothetical protein POPTR_0012s11910g [Populus trichocarpa]
Potri.006G105000.v3.0	33	48	44	11	15	11	1.215	1.75416	1.61236	0.427907	0.553641	0.41891	0.000788752	-1.76239	down	[T]	Signal transduction mechanisms	Molecular Function: phosphoprotein phosphatase activity (GO:0004721);; Molecular Function: protein serine/threonine phosphatase activity (GO:0004722);; Molecular Function: protein binding (GO:0005515);; Cellular Component: nucleus (GO:0005634);; Cellular Component: cytoplasm (GO:0005737);; Cellular Component: plasma membrane (GO:0005886);; Biological Process: protein dephosphorylation (GO:0006470…	--	[T]	Signal transduction mechanisms	Probable protein phosphatase 2C 65 GN=At5g01700 OS=Arabidopsis thaliana (Mouse-ear cress) PE=2 SV=1	hypothetical protein POPTR_0006s10580g [Populus trichocarpa]
Potri.T093200.v3.0	37	53	52	11	15	17	0.932602	1.34353	1.31893	0.295619	0.380193	0.44315	0.000473595	-1.72951	down	[S]	Function unknown	Molecular Function: binding (GO:0005488);; Biological Process: defense response (GO:0006952);; Molecular Function: hydrolase activity (GO:0016787);; Molecular Function: ADP binding (GO:0043531);; Cellular Component: cell part (GO:0044464);;	K13457|0|pop:POPTR_0005s01340g|NBS-LRR resistance gene-like protein ARGH35; K13457 disease resistance protein RPM1 (A)	[T]	Signal transduction mechanisms	Disease resistance protein RPM1 GN=F17A9.20 OS=Arabidopsis thaliana (Mouse-ear cress) PE=1 SV=1	NBS-LRR resistance gene-like protein ARGH35 [Populus trichocarpa]
Potri.005G007700.v3.0	44	51	38	19	10	13	2.00866	2.38726	1.45301	0.521292	0.337715	0.488972	0.00108002	-1.66805	down	--	--	--	--	[R]	General function prediction only	Disease resistance protein RPM1 GN=F17A9.20 OS=Arabidopsis thaliana (Mouse-ear cress) PE=1 SV=1	hypothetical protein POPTR_0005s00960g [Populus trichocarpa]
Potri.017G127000.v3.0	86	98	97	24	38	29	2.02499	2.22937	2.34368	1.08441	1.6299	0.76515	6.69e-06	-1.63267	down	--	--	Molecular Function: binding (GO:0005488);; Cellular Component: cell part (GO:0044464);;	--	[T]	Signal transduction mechanisms	Putative disease resistance protein RGA4 GN=RGA4 OS=Solanum bulbocastanum (Wild potato) PE=2 SV=1	hypothetical protein POPTR_0005s14340g [Populus trichocarpa]
Potri.017G122300.v3.0	130	198	223	50	74	55	9.98939	16.0451	16.3406	3.42148	5.44131	5.85716	0.000106873	-1.62839	down	--	--	--	--	[A]	RNA processing and modification	Probable E3 ubiquitin ligase SUD1 GN=F28A23.140 OS=Arabidopsis thaliana (Mouse-ear cress) PE=1 SV=1	hypothetical protein POPTR_0005s14860g [Populus trichocarpa]
Potri.016G092600.v3.0	102	133	162	32	55	46	2.62908	3.37943	4.19852	0.820465	1.43297	1.18194	1.76e-05	-1.58404	down	--	--	Molecular Function: binding (GO:0005488);; Molecular Function: ATP binding (GO:0005524);; Biological Process: defense response (GO:0006952);; Molecular Function: nucleoside-triphosphatase activity (GO:0017111);; Molecular Function: ADP binding (GO:0043531);;	--	[T]	Signal transduction mechanisms	Disease resistance RPP13-like protein 4 GN=RPP13L4 OS=Arabidopsis thaliana (Mouse-ear cress) PE=2 SV=2	hypothetical protein POPTR_0016s09570g [Populus trichocarpa]
Potri.017G127200.v3.0	216	223	225	75	91	59	4.35906	4.48972	4.51821	1.4825	1.80141	1.18184	4.88e-11	-1.56709	down	--	--	Molecular Function: binding (GO:0005488);;	--	[T]	Signal transduction mechanisms	Putative disease resistance protein RGA4 GN=RGA4 OS=Solanum bulbocastanum (Wild potato) PE=2 SV=1	PREDICTED: putative disease resistance protein RGA4 isoform X1 [Populus euphratica]
Potri.003G149900.v3.0	89	94	154	32	38	45	2.47563	2.49946	4.5699	0.83063	1.0823	1.28224	0.00349222	-1.5573	down	--	--	Biological Process: regulation of cell growth (GO:0001558);; Molecular Function: catalytic activity (GO:0003824);; Molecular Function: protein kinase activity (GO:0004672);; Cellular Component: mitochondrion (GO:0005739);; Cellular Component: plasma membrane (GO:0005886);; Biological Process: cellular protein modification process (GO:0006464);; Biological Process: organelle organization (GO:00069…	--	--	--	Probable LRR receptor-like serine/threonine-protein kinase At3g47570 (Precursor) GN=At3g47570 OS=Arabidopsis thaliana (Mouse-ear cress) PE=2 SV=1	hypothetical protein POPTR_0003s14970g [Populus trichocarpa]
Potri.017G136400.v3.0	155	141	251	70	48	75	2.99962	2.74683	4.82443	1.32452	0.924912	1.4211	0.00606163	-1.50875	down	[S]	Function unknown	Molecular Function: binding (GO:0005488);;	--	[T]	Signal transduction mechanisms	Putative disease resistance protein RGA1 GN=RGA1 OS=Solanum bulbocastanum (Wild potato) PE=2 SV=2	hypothetical protein POPTR_0154s00220g [Populus trichocarpa]
Potri.015G117300.v3.0	931	1151	848	353	353	388	19.5001	23.7977	17.9469	7.32173	7.29585	8.03938	8.26e-11	-1.42682	down	--	--	--	--	--	--	Putative E3 ubiquitin-protein ligase LIN-2 {ECO:0000303|PubMed:19776163} OS=Lotus japonicus (Lotus corniculatus var. japonicus) PE=1 SV=1	hypothetical protein POPTR_0015s15790g [Populus trichocarpa]
Potri.001G169000.v3.0	3621	3437	3565	726	1788	1997	303.768	285.341	294.778	59.5979	147.089	166.747	2.3e-06	-1.24173	down	--	--	Molecular Function: superoxide dismutase activity (GO:0004784);; Cellular Component: extracellular region (GO:0005576);; Cellular Component: nucleus (GO:0005634);; Biological Process: L-fucose biosynthetic process (GO:0006005);; Biological Process: response to cold (GO:0009409);; Cellular Component: plant-type cell wall (GO:0009505);; Biological Process: auxin-activated signaling pathway (GO:0009…	--	--	--	Auxin-binding protein ABP19a (Precursor) GN=ABP19A OS=Prunus persica (Peach) PE=3 SV=1	germin-like family protein [Populus trichocarpa]
Potri.012G053200.v3.0	66	104	120	33	40	52	1.16814	1.80554	2.09535	0.574207	0.693298	0.922094	0.00979547	-1.22026	down	[S]	Function unknown	Biological Process: immune system process (GO:0002376);; Molecular Function: binding (GO:0005488);; Molecular Function: ATP binding (GO:0005524);; Cellular Component: mitochondrion (GO:0005739);; Biological Process: defense response (GO:0006952);; Biological Process: signal transduction (GO:0007165);; Biological Process: response to light stimulus (GO:0009416);; Cellular Component: chloroplast (G…	--	--	--	TMV resistance protein N GN=N OS=Nicotiana glutinosa (Tobacco) PE=1 SV=1	disease resistance family protein [Populus trichocarpa]
Potri.011G164800.v3.0	230	264	215	70	111	129	5.10922	5.8306	4.75119	1.53858	2.44917	2.90283	1.58e-07	-1.19932	down	[S]	Function unknown	Biological Process: transition metal ion transport (GO:0000041);; Molecular Function: nucleotide binding (GO:0000166);; Biological Process: response to molecule of bacterial origin (GO:0002237);; Molecular Function: protein kinase activity (GO:0004672);; Molecular Function: protein serine/threonine kinase activity (GO:0004674);; Molecular Function: protein binding (GO:0005515);; Molecular Functio…	--	--	--	Probable LRR receptor-like serine/threonine-protein kinase At4g26540 (Precursor) GN=At4g26540 OS=Arabidopsis thaliana (Mouse-ear cress) PE=2 SV=1	kinase family protein [Populus trichocarpa]
Potri.013G001000.v3.0	44	79	71	29	28	28	1.77963	3.20913	2.88713	1.18019	1.15207	1.17368	0.00632929	-1.19643	down	[KAD]	--	Biological Process: tryptophan biosynthetic process (GO:0000162);; Biological Process: MAPK cascade (GO:0000165);; Biological Process: defense response to insect (GO:0002213);; Molecular Function: DNA binding (GO:0003677);; Molecular Function: chromatin binding (GO:0003682);; Molecular Function: sequence-specific DNA binding transcription factor activity (GO:0003700);; Cellular Component: nucleus…	K09422|0|pop:POPTR_0013s00290g|POPTRDRAFT_570647; hypothetical protein; K09422 myb proto-oncogene protein, plant (A)	[K]	Transcription	Transcription factor MYB86 GN=F21E10.4 OS=Arabidopsis thaliana (Mouse-ear cress) PE=2 SV=1	hypothetical protein POPTR_0013s00290g [Populus trichocarpa]
Potri.006G104100.v3.0	56	86	89	31	34	37	4.99026	7.5471	7.95392	2.74532	3.04956	3.45445	0.0033005	-1.18532	down	--	--	Molecular Function: protein phosphatase inhibitor activity (GO:0004864);; Molecular Function: receptor activity (GO:0004872);; Cellular Component: nucleus (GO:0005634);; Cellular Component: mitochondrion (GO:0005739);; Biological Process: tryptophan catabolic process (GO:0006569);; Biological Process: fatty acid catabolic process (GO:0009062);; Cellular Component: chloroplast (GO:0009507);; Biolo…	K14496|2.50353e-133|pop:POPTR_0006s10500g|POPTRDRAFT_416581; hypothetical protein; K14496 abscisic acid receptor PYR/PYL family (A)	--	--	Abscisic acid receptor PYL4 GN=T19C21.20 OS=Arabidopsis thaliana (Mouse-ear cress) PE=1 SV=1	hypothetical protein POPTR_0006s10500g [Populus trichocarpa]
Potri.016G099900.v3.0	111	84	84	36	43	45	7.42211	5.57075	5.55849	2.45707	2.90706	3.06651	0.00142304	-1.17544	down	--	--	Molecular Function: sequence-specific DNA binding transcription factor activity (GO:0003700);; Cellular Component: nucleus (GO:0005634);; Biological Process: regulation of transcription, DNA-templated (GO:0006355);; Biological Process: amino acid transport (GO:0006865);; Biological Process: immune response (GO:0006955);; Biological Process: toxin catabolic process (GO:0009407);; Biological Proces…	--	--	--	Probable WRKY transcription factor 49 GN=WRKY49 OS=Arabidopsis thaliana (Mouse-ear cress) PE=2 SV=1	hypothetical protein POPTR_0016s10610g [Populus trichocarpa]
Potri.012G089900.v3.0	749	1025	1107	370	469	475	30.4651	40.8523	44.6178	14.838	18.6739	19.1198	4.92e-05	-1.13866	down	[Q]	Secondary metabolites biosynthesis, transport and catabolism	Biological Process: response to molecule of bacterial origin (GO:0002237);; Molecular Function: monooxygenase activity (GO:0004497);; Molecular Function: binding (GO:0005488);; Molecular Function: iron ion binding (GO:0005506);; Cellular Component: Golgi apparatus (GO:0005794);; Molecular Function: electron carrier activity (GO:0009055);; Biological Process: systemic acquired resistance (GO:00096…	--	[Q]	Secondary metabolites biosynthesis, transport and catabolism	Cytochrome P450 71A1 GN=CYP71A1 OS=Persea americana (Avocado) PE=1 SV=2	hypothetical protein POPTR_0012s09160g [Populus trichocarpa]
Potri.003G065300.v3.0	619	593	539	190	323	333	70.9465	67.2154	61.8026	21.5746	36.7044	38.907	6.05e-08	-1.05527	down	--	--	Molecular Function: superoxide dismutase activity (GO:0004784);; Cellular Component: extracellular region (GO:0005576);; Cellular Component: nucleus (GO:0005634);; Biological Process: L-fucose biosynthetic process (GO:0006005);; Biological Process: response to cold (GO:0009409);; Cellular Component: plant-type cell wall (GO:0009505);; Biological Process: stomatal complex morphogenesis (GO:0010103…	--	--	--	Auxin-binding protein ABP19a (Precursor) GN=ABP19A OS=Prunus persica (Peach) PE=3 SV=1	unknown [Populus trichocarpa]
Potri.011G075400.v3.0	61	96	81	235	155	189	1.41378	2.18496	1.82962	5.22071	3.47009	4.30594	9.13e-05	1.27708	up	[RTKL]	--	Biological Process: respiratory burst involved in defense response (GO:0002679);; Molecular Function: protein serine/threonine kinase activity (GO:0004674);; Molecular Function: calmodulin binding (GO:0005516);; Cellular Component: plasma membrane (GO:0005886);; Biological Process: protein targeting to membrane (GO:0006612);; Biological Process: oligopeptide transport (GO:0006857);; Biological Pr…	--	--	--	Probable LRR receptor-like serine/threonine-protein kinase At1g29720 (Precursor) GN=RFK1 OS=Arabidopsis thaliana (Mouse-ear cress) PE=2 SV=3	PREDICTED: probable LRR receptor-like serine/threonine-protein kinase At1g29720 isoform X7 [Populus euphratica]
Potri.004G170300.v3.0	14	24	19	50	56	43	0.313998	0.54385	0.436593	1.10944	1.23642	0.95465	0.00488889	1.38037	up	[S]	Function unknown	Molecular Function: binding (GO:0005488);; Biological Process: defense response (GO:0006952);;	--	[T]	Signal transduction mechanisms	Putative disease resistance protein RGA3 GN=RGA3 OS=Solanum bulbocastanum (Wild potato) PE=2 SV=2	hypothetical protein POPTR_0014s00500g [Populus trichocarpa]
Potri.005G224100.v3.0	14	12	27	62	39	42	1.10719	0.990125	2.10294	4.8367	3.02275	3.35669	0.0050526	1.42602	up	[KAD]	--	Biological Process: tryptophan biosynthetic process (GO:0000162);; Biological Process: MAPK cascade (GO:0000165);; Biological Process: defense response to insect (GO:0002213);; Molecular Function: DNA binding (GO:0003677);; Molecular Function: chromatin binding (GO:0003682);; Molecular Function: sequence-specific DNA binding transcription factor activity (GO:0003700);; Cellular Component: nucleus…	K09422|0|pop:POPTR_0005s24550g|POPTRDRAFT_559693; hypothetical protein; K09422 myb proto-oncogene protein, plant (A)	[K]	Transcription	Myb-related protein Myb4 GN=OSJNBa0073E02.6 OS=Oryza sativa subsp. japonica (Rice) PE=2 SV=2	hypothetical protein POPTR_0005s24550g [Populus trichocarpa]
Potri.T032200.v3.0	25	24	28	84	53	74	0.84564	0.802518	0.915581	2.72414	1.72684	2.43311	0.000477553	1.44889	up	[RTKL]	--	Molecular Function: protein serine/threonine kinase activity (GO:0004674);; Molecular Function: calmodulin binding (GO:0005516);; Molecular Function: ATP binding (GO:0005524);; Cellular Component: plasma membrane (GO:0005886);; Biological Process: oligopeptide transport (GO:0006857);; Biological Process: defense response (GO:0006952);; Biological Process: transmembrane receptor protein tyrosine k…	--	[T]	Signal transduction mechanisms	Probable LRR receptor-like serine/threonine-protein kinase At1g29720 (Precursor) GN=RFK1 OS=Arabidopsis thaliana (Mouse-ear cress) PE=2 SV=3	PREDICTED: probable LRR receptor-like serine/threonine-protein kinase At1g29720 isoform X6 [Populus euphratica]
Potri.010G155200.v3.0	90	107	94	279	319	240	2.52832	2.96509	2.63262	7.72345	8.86934	6.78216	1.65e-12	1.52016	up	[RTKL]	--	Biological Process: developmental process involved in reproduction (GO:0003006);; Molecular Function: protein serine/threonine kinase activity (GO:0004674);; Molecular Function: binding (GO:0005488);; Cellular Component: plasma membrane (GO:0005886);; Biological Process: signal transduction (GO:0007165);; Biological Process: multicellular organismal development (GO:0007275);; Cellular Component: …	--	--	--	Probable LRR receptor-like serine/threonine-protein kinase At1g53430 (Precursor) GN=At1g53430 OS=Arabidopsis thaliana (Mouse-ear cress) PE=1 SV=1	PREDICTED: probable LRR receptor-like serine/threonine-protein kinase At1g53430 [Populus euphratica]
Potri.001G308600.v3.0	49	65	72	243	171	177	1.14335	1.50888	1.66139	5.59172	3.94132	4.09183	1.49e-07	1.66218	up	[RTKL]	--	Molecular Function: protein serine/threonine kinase activity (GO:0004674);; Molecular Function: calmodulin binding (GO:0005516);; Cellular Component: plasma membrane (GO:0005886);; Biological Process: protein folding (GO:0006457);; Biological Process: oligopeptide transport (GO:0006857);; Biological Process: response to heat (GO:0009408);; Cellular Component: plasmodesma (GO:0009506);; Biological…	--	--	--	Probable LRR receptor-like serine/threonine-protein kinase At1g07650 (Precursor) GN=At1g07650 OS=Arabidopsis thaliana (Mouse-ear cress) PE=1 SV=1	PREDICTED: probable LRR receptor-like serine/threonine-protein kinase At1g07650 isoform X1 [Populus euphratica]
Potri.T049400.v3.0	2	3	13	26	22	19	0.126818	0.171594	0.732457	1.42952	1.2184	1.0617	0.00786668	1.88915	up	--	--	Molecular Function: protein binding (GO:0005515);; Cellular Component: mitochondrion (GO:0005739);; Biological Process: signal transduction (GO:0007165);; Cellular Component: plasmodesma (GO:0009506);; Cellular Component: plastid stroma (GO:0009532);; Biological Process: response to ozone (GO:0010193);; Cellular Component: membrane (GO:0016020);; Biological Process: cellular metabolic process (GO…	--	--	--	TMV resistance protein N GN=N OS=Nicotiana glutinosa (Tobacco) PE=1 SV=1	hypothetical protein POPTR_0005s03160g [Populus trichocarpa]
Potri.005G141400.v3.0	25	24	28	103	132	128	1.4532	1.41722	1.63737	5.90335	7.59774	7.51356	2.43e-11	2.23116	up	--	--	Biological Process: immune effector process (GO:0002252);; Molecular Function: DNA binding (GO:0003677);; Molecular Function: sequence-specific DNA binding transcription factor activity (GO:0003700);; Molecular Function: calmodulin binding (GO:0005516);; Cellular Component: nucleus (GO:0005634);; Biological Process: regulation of transcription, DNA-templated (GO:0006355);; Biological Process: iro…	--	--	--	Probable WRKY transcription factor 7 GN=WRKY7 OS=Arabidopsis thaliana (Mouse-ear cress) PE=2 SV=1	WRKY transcription factor 15 family protein [Populus trichocarpa]
Potri.005G043700.v3.0	5	2	3	21	19	11	0.223934	0.0862751	0.127671	0.868795	0.790822	0.468046	0.00447365	2.34533	up	--	--	Biological Process: immune system process (GO:0002376);; Biological Process: ion transport (GO:0006811);; Biological Process: defense response (GO:0006952);; Biological Process: cell communication (GO:0007154);; Biological Process: tissue development (GO:0009888);; Biological Process: cellular metabolic process (GO:0044237);; Biological Process: single-organism developmental process (GO:0044767);…	--	--	--	Probable LRR receptor-like serine/threonine-protein kinase At1g05700 (Precursor) GN=At1g05700 OS=Arabidopsis thaliana (Mouse-ear cress) PE=2 SV=1	hypothetical protein POPTR_0005s04520g [Populus trichocarpa]
Potri.011G055400.v3.0	18	10	16	95	112	110	0.588461	0.349626	0.550054	3.06494	3.60636	3.48871	2.42e-14	2.84325	up	--	--	--	--	[O]	Posttranslational modification, protein turnover, chaperones	Receptor-like protein 12 (Precursor) GN=RLP12 OS=Arabidopsis thaliana (Mouse-ear cress) PE=2 SV=2	hypothetical protein POPTR_0012s032801g, partial [Populus trichocarpa]
Potri.008G075200.v3.0	21	12	13	177	89	102	2.46332	1.47316	1.57555	20.2959	10.0771	12.0811	7.64e-05	2.99522	up	--	--	Biological Process: response to stress (GO:0006950);; Biological Process: aging (GO:0007568);; Biological Process: response to fungus (GO:0009620);;	--	--	--	Wound-induced protein 1 GN=WUN1 OS=Solanum tuberosum (Potato) PE=2 SV=1	wound-responsive family protein [Populus trichocarpa]
Potri.001G092100.v3.0	7	6	4	93	88	85	0.232212	0.188271	0.139984	3.04203	2.87046	2.82756	9.66e-19	3.96264	up	[T]	Signal transduction mechanisms	Molecular Function: phosphoprotein phosphatase activity (GO:0004721);; Molecular Function: protein serine/threonine phosphatase activity (GO:0004722);; Molecular Function: protein binding (GO:0005515);; Cellular Component: nucleus (GO:0005634);; Cellular Component: Golgi apparatus (GO:0005794);; Cellular Component: cytosol (GO:0005829);; Biological Process: negative regulation of protein kinase a…	K14497|0|pop:POPTR_0001s10570g|POPTRDRAFT_180022; hypothetical protein; K14497 protein phosphatase 2C [EC:3.1.3.16] (A)	[T]	Signal transduction mechanisms	Probable protein phosphatase 2C 51 OS=Oryza sativa subsp. japonica (Rice) PE=2 SV=1	hypothetical protein POPTR_0001s10570g [Populus trichocarpa]
Potri.004G198700.v3.0	2	2	2	36	37	44	0.0449788	0.0405979	0.0417285	0.685858	0.70877	0.840413	9.37e-11	4.27977	up	--	--	Molecular Function: binding (GO:0005488);;	--	[T]	Signal transduction mechanisms	Putative disease resistance protein RGA3 GN=RGA3 OS=Solanum bulbocastanum (Wild potato) PE=2 SV=2	PREDICTED: putative disease resistance protein RGA3 [Populus euphratica]
Potri.010G007800.v3.0	117	37	24	2759	1964	2404	11.2895	3.59683	2.37611	262.556	188.591	234.289	7.05e-52	5.31913	up	--	--	Molecular Function: endopeptidase inhibitor activity (GO:0004866);; Biological Process: proteolysis (GO:0006508);; Molecular Function: peptidase activity (GO:0008233);; Biological Process: negative regulation of endopeptidase activity (GO:0010951);;	--	--	--	Wound-responsive protein GWIN3 (Precursor) GN=GWIN3 OS=Populus sp. (Poplar) PE=2 SV=1	hypothetical protein POPTR_0010s01160g [Populus trichocarpa]
Potri.010G007500.v3.0	75	28	8	1508	1442	1597	10.543	4.01915	1.1768	210.102	201.187	230.006	1.1e-173	5.35208	up	--	--	Molecular Function: endopeptidase inhibitor activity (GO:0004866);; Biological Process: proteolysis (GO:0006508);; Molecular Function: peptidase activity (GO:0008233);; Biological Process: negative regulation of endopeptidase activity (GO:0010951);;	--	--	--	Wound-responsive protein GWIN3 (Precursor) GN=GWIN3 OS=Populus sp. (Poplar) PE=2 SV=1	hypothetical protein POPTR_0010s00955g [Populus trichocarpa]
Potri.T029100.v3.0	53	17	1	933	966	1024	6.90204	2.19791	0.13438	120.299	122.463	135.589	6.85e-150	5.35953	up	--	--	Molecular Function: endopeptidase inhibitor activity (GO:0004866);; Biological Process: proteolysis (GO:0006508);; Molecular Function: peptidase activity (GO:0008233);; Biological Process: negative regulation of endopeptidase activity (GO:0010951);;	--	--	--	Wound-responsive protein GWIN3 (Precursor) GN=GWIN3 OS=Populus sp. (Poplar) PE=2 SV=1	Kunitz-type protease inhibitor KPI-A2.2 [Populus trichocarpa]
Potri.T092600.v3.0	0	1	2	338	344	317	0	0.0118452	0.0230198	3.58763	3.67432	3.42365	6.89e-96	8.37217	up	--	--	--	--	[T]	Signal transduction mechanisms	Disease resistance protein At4g27190 GN=At4g27190 OS=Arabidopsis thaliana (Mouse-ear cress) PE=2 SV=1	putative disease resistance gene NBS-LRR family protein [Populus trichocarpa]
Potri.T092500.v3.0	0	0	0	204	185	185	0.0142722	0	0	3.66776	3.40446	3.4391	5.54e-61	Inf	up	[S]	Function unknown	Molecular Function: binding (GO:0005488);;	--	[T]	Signal transduction mechanisms	Putative disease resistance protein RGA4 GN=RGA4 OS=Solanum bulbocastanum (Wild potato) PE=2 SV=1	hypothetical protein POPTR_0019s052902g, partial [Populus trichocarpa]
